# Supplementary material for: Effect of the Supports’ Positions on the Vibration Characteristics of a Flexible Rotor Shafting
Source: Hindawi journal article supplement (doi:10.1155/2020/1592794), 2020-02-12
Supplement: f1 [file 1592794.f1.zip]

Archive with 17 entries (16 files):
- 1592794.f1/test_data/
- 1592794.f1/test_data/figure15.xlsx
- 1592794.f1/test_data/read_data.m
- 1592794.f1/test_data/Table10_1.xlsx
- 1592794.f1/test_data/Table10_2.xlsx
- 1592794.f1/test_data/Table10_3.xlsx
- 1592794.f1/test_data/Table10_4.xlsx
- 1592794.f1/test_data/Table10_5.xlsx
- 1592794.f1/test_data/Table10_6.xlsx
- 1592794.f1/test_data/Table10_7.xlsx
- 1592794.f1/test_data/Table11_10.xlsx
- 1592794.f1/test_data/Table11_11.xlsx
- 1592794.f1/test_data/Table11_12.xlsx
- 1592794.f1/test_data/Table11_13.xlsx
- 1592794.f1/test_data/Table11_8.xlsx
- 1592794.f1/test_data/Table11_9.xlsx
- 1592794.f1/test_data/Test data description.docx
