# Supplementary material for: Effect of the Supports’ Positions on the Vibration Characteristics of a Flexible Rotor Shafting
Source: Hindawi journal article supplement (doi:10.1155/2020/1592794), 2020-02-12
Supplement: f1 [file 1592794.f1.zip › 1592794.f1/test_data/figure15.xlsx]

## Sheet: Sheet1
Time t/s	vibration deformation amount u/mm
0	0.000643
0.002	0.00108
0.0039	0.00114
0.0059	0.00101
0.0078	0.00106
0.0098	0.00107
0.0117	0.00143
0.0137	0.00118
0.0156	0.00131
0.0176	0.00148
0.0195	0.00124
0.0215	0.00135
0.0234	0.00161
0.0254	0.00175
0.0273	0.00146
0.0293	0.00201
0.0313	0.00218
0.0332	0.00217
0.0352	0.00201
0.0371	0.0023
0.0391	0.00272
0.041	0.00258
0.043	0.00326
0.0449	0.00279
0.0469	0.00332
0.0488	0.00305
0.0508	0.00281
0.0527	0.00332
0.0547	0.00337
0.0566	0.00371
0.0586	0.00374
0.0605	0.00417
0.0625	0.00377
0.0645	0.0046
0.0664	0.00444
0.0684	0.00468
0.0703	0.00502
0.0723	0.00554
0.0742	0.00544
0.0762	0.00567
0.0781	0.00551
0.0801	0.00578
0.082	0.00593
0.084	0.00636
0.0859	0.00614
0.0879	0.00619
0.0898	0.00649
0.0918	0.00673
0.0938	0.00654
0.0957	0.00678
0.0977	0.00695
0.0996	0.00715
0.1016	0.00699
0.1035	0.00674
0.1055	0.00727
0.1074	0.00721
0.1094	0.00759
0.1113	0.00777
0.1133	0.0079
0.1152	0.0081
0.1172	0.00847
0.1191	0.00858
0.1211	0.00923
0.123	0.00947
0.125	0.00995
0.127	0.00974
0.1289	0.0101
0.1309	0.0103
0.1328	0.0109
0.1348	0.0114
0.1367	0.0116
0.1387	0.0119
0.1406	0.0124
0.1426	0.0132
0.1445	0.0141
0.1465	0.0154
0.1484	0.0151
0.1504	0.0137
0.1523	0.0125
0.1543	0.0124
0.1563	0.0137
0.1582	0.0151
0.1602	0.0165
0.1621	0.0161
0.1641	0.0155
0.166	0.0142
0.168	0.0128
0.1699	0.0129
0.1719	0.0134
0.1738	0.0148
0.1758	0.0156
0.1777	0.0146
0.1797	0.0133
0.1816	0.0118
0.1836	0.011
0.1855	0.0111
0.1875	0.0114
0.1895	0.0122
0.1914	0.013
0.1934	0.0123
0.1953	0.0105
0.1973	0.00966
0.1992	0.00835
0.2012	0.00782
0.2031	0.00849
0.2051	0.0086
0.207	0.00973
0.209	0.00927
0.2109	0.00792
0.2129	0.00722
0.2148	0.00663
0.2168	0.0064
0.2188	0.00713
0.2207	0.00853
0.2227	0.0092
0.2246	0.00905
0.2266	0.00763
0.2285	0.00607
0.2305	0.00495
0.2324	0.00688
0.2344	0.00986
0.2363	0.0127
0.2383	0.0125
0.2402	0.0108
0.2422	0.00979
0.2441	0.00934
0.2461	0.01
0.248	0.0116
0.25	0.0146
0.252	0.0165
0.2539	0.0165
0.2559	0.0145
0.2578	0.0127
0.2598	0.0128
0.2617	0.0142
0.2637	0.0157
0.2656	0.0175
0.2676	0.0189
0.2695	0.0193
0.2715	0.0176
0.2734	0.0171
0.2754	0.0181
0.2773	0.02
0.2793	0.0215
0.2813	0.0207
0.2832	0.0188
0.2852	0.0153
0.2871	0.0127
0.2891	0.012
0.291	0.0131
0.293	0.0141
0.2949	0.013
0.2969	0.0112
0.2988	0.00969
0.3008	0.0069
0.3027	0.00366
0.3047	0.00169
0.3066	0.00172
0.3086	0.00143
0.3105	0.000649
0.3125	-0.00203
0.3145	-0.00397
0.3164	-0.00463
0.3184	-0.00548
0.3203	-0.00548
0.3223	-0.00501
0.3242	-0.00247
0.3262	-3.62e-05
0.3281	0.000748
0.3301	-0.000163
0.332	-0.00149
0.334	-0.00209
0.3359	-0.00143
0.3379	-0.00143
0.3398	-0.00108
0.3418	0.000582
0.3438	0.00248
0.3457	0.0025
0.3477	0.000933
0.3496	9.06e-05
0.3516	0.000584
0.3535	0.0011
0.3555	-0.000158
0.3574	-0.00203
0.3594	-0.00175
0.3613	-0.00169
0.3633	-0.00367
0.3652	-0.00575
0.3672	-0.00517
0.3691	-0.00256
0.3711	-0.000432
0.373	-0.00134
0.375	-0.0024
0.377	0.000109
0.3789	0.00424
0.3809	0.00631
0.3828	0.00803
0.3848	0.0114
0.3867	0.0162
0.3887	0.0169
0.3906	0.0119
0.3926	0.00724
0.3945	0.00709
0.3965	0.0101
0.3984	0.0114
0.4004	0.0109
0.4023	0.0105
0.4043	0.0119
0.4063	0.0104
0.4082	0.00503
0.4102	0.00234
0.4121	0.00542
0.4141	0.0121
0.416	0.0173
0.418	0.0193
0.4199	0.0186
0.4219	0.0167
0.4238	0.0139
0.4258	0.0126
0.4277	0.0131
0.4297	0.0155
0.4316	0.0185
0.4336	0.0196
0.4355	0.0165
0.4375	0.00728
0.4395	-0.00427
0.4414	-0.0142
0.4434	-0.0154
0.4453	-0.0104
0.4473	-0.00416
0.4492	-0.000789
0.4512	0.000188
0.4531	-0.0005
0.4551	-0.00429
0.457	-0.00842
0.459	-0.00548
0.4609	0.00416
0.4629	0.0133
0.4648	0.0119
0.4668	0.00251
0.4688	-0.0065
0.4707	-0.013
0.4727	-0.0168
0.4746	-0.0151
0.4766	-0.00553
0.4785	0.00674
0.4805	0.0112
0.4824	0.00381
0.4844	-0.00271
0.4863	-0.0019
0.4883	0.00441
0.4902	0.00855
0.4922	0.0116
0.4941	0.0151
0.4961	0.018
0.498	0.0134
0.5	0.00256
0.502	-0.00419
0.5039	-0.000176
0.5059	0.00857
0.5078	0.0141
0.5098	0.016
0.5117	0.0172
0.5137	0.0169
0.5156	0.0133
0.5176	0.00914
0.5195	0.0106
0.5215	0.0164
0.5234	0.0193
0.5254	0.0178
0.5273	0.0113
0.5293	0.00414
0.5313	-0.00326
0.5332	-0.00798
0.5352	-0.00837
0.5371	-0.00439
0.5391	-0.000294
0.541	0.00123
0.543	-0.00128
0.5449	-0.00507
0.5469	-0.00842
0.5488	-0.0093
0.5508	-0.00512
0.5527	-0.000215
0.5547	0.00358
0.5566	0.00363
0.5586	0.000195
0.5605	-0.00583
0.5625	-0.0108
0.5645	-0.0112
0.5664	-0.00653
0.5684	0.00267
0.5703	0.0134
0.5723	0.0176
0.5742	0.0148
0.5762	0.0085
0.5781	0.00492
0.5801	0.00476
0.582	0.0048
0.584	0.00621
0.5859	0.00972
0.5879	0.0135
0.5898	0.0131
0.5918	0.01
0.5938	0.00942
0.5957	0.0128
0.5977	0.0157
0.5996	0.0153
0.6016	0.0152
0.6035	0.016
0.6055	0.0124
0.6074	0.000546
0.6094	-0.0123
0.6113	-0.0165
0.6133	-0.0108
0.6152	-0.00452
0.6172	-0.000756
0.6191	0.00231
0.6211	0.00467
0.623	0.0039
0.625	-0.00214
0.627	-0.00957
0.6289	-0.0138
0.6309	-0.0111
0.6328	-0.00537
0.6348	-0.000774
0.6367	0.00186
0.6387	0.00173
0.6406	0.00274
0.6426	0.00392
0.6445	0.00411
0.6465	0.00474
0.6484	0.00672
0.6504	0.0102
0.6523	0.0123
0.6543	0.0104
0.6563	0.00661
0.6582	0.00467
0.6602	0.00736
0.6621	0.012
0.6641	0.0161
0.666	0.0178
0.668	0.0185
0.6699	0.0185
0.6719	0.014
0.6738	0.00592
0.6758	-0.00183
0.6777	-0.0051
0.6797	-0.00357
0.6816	-0.00247
0.6836	-0.0067
0.6855	-0.00876
0.6875	-0.00578
0.6895	-0.00214
0.6914	-0.00184
0.6934	-0.00222
0.6953	-0.000861
0.6973	-1.93e-05
0.6992	-0.00397
0.7012	-0.0107
0.7031	-0.0131
0.7051	-0.00698
0.707	0.00275
0.709	0.011
0.7109	0.0126
0.7129	0.0115
0.7148	0.0117
0.7168	0.0101
0.7188	0.0039
0.7207	0.000936
0.7227	0.00509
0.7246	0.0119
0.7266	0.0145
0.7285	0.0138
0.7305	0.0143
0.7324	0.016
0.7344	0.0153
0.7363	0.0113
0.7383	0.00685
0.7402	0.00162
0.7422	-0.00288
0.7441	-0.00657
0.7461	-0.00722
0.748	-0.00688
0.75	-0.00375
0.752	0.000176
0.7539	0.00047
0.7559	-0.00232
0.7578	-0.00514
0.7598	-0.00677
0.7617	-0.00737
0.7637	-0.0082
0.7656	-0.0059
0.7676	-0.0014
0.7695	0.00464
0.7715	0.00882
0.7734	0.00782
0.7754	0.00576
0.7773	0.00636
0.7793	0.00795
0.7813	0.00794
0.7832	0.00967
0.7852	0.0126
0.7871	0.014
0.7891	0.0114
0.791	0.00987
0.793	0.0114
0.7949	0.0136
0.7969	0.0143
0.7988	0.0128
0.8008	0.00736
0.8027	-0.00223
0.8047	-0.0106
0.8066	-0.0163
0.8086	-0.0159
0.8105	-0.00795
0.8125	0.00163
0.8145	0.00724
0.8164	0.0076
0.8184	0.00136
0.8203	-0.0102
0.8223	-0.0212
0.8242	-0.0202
0.8262	-0.00756
0.8281	0.00757
0.8301	0.0181
0.832	0.0196
0.834	0.0138
0.8359	0.00473
0.8379	-0.00438
0.8398	-0.00644
0.8418	0.00314
0.8438	0.0179
0.8457	0.0237
0.8477	0.0196
0.8496	0.0148
0.8516	0.0124
0.8535	0.00665
0.8555	0.00112
0.8574	-0.00139
0.8594	0.000655
0.8613	0.00354
0.8633	0.00193
0.8652	-0.00365
0.8672	-0.00715
0.8691	-0.00893
0.8711	-0.00988
0.873	-0.00838
0.875	-0.00374
0.877	0.00138
0.8789	-0.000216
0.8809	-0.00305
0.8828	-0.00615
0.8848	-0.0058
0.8867	-0.00109
0.8887	0.00466
0.8906	0.0109
0.8926	0.015
0.8945	0.0148
0.8965	0.0107
0.8984	0.00662
0.9004	0.00372
0.9023	0.00333
0.9043	0.0094
0.9063	0.0174
0.9082	0.0197
0.9102	0.0171
0.9121	0.0108
0.9141	-0.00035
0.916	-0.013
0.918	-0.0185
0.9199	-0.0167
0.9219	-0.00659
0.9238	0.00269
0.9258	0.00747
0.9277	0.00677
0.9297	-0.000807
0.9316	-0.0135
0.9336	-0.0236
0.9355	-0.0202
0.9375	-0.00622
0.9395	0.0118
0.9414	0.0238
0.9434	0.0211
0.9453	0.00921
0.9473	-0.00363
0.9492	-0.00941
0.9512	-0.00375
0.9531	0.00946
0.9551	0.0217
0.957	0.0286
0.959	0.0264
0.9609	0.0151
0.9629	0.000418
0.9648	-0.00733
0.9668	-0.0088
0.9688	-0.00563
0.9707	0.00293
0.9727	0.00754
0.9746	0.00326
0.9766	-0.00797
0.9785	-0.016
0.9805	-0.0158
0.9824	-0.0113
0.9844	-0.00427
0.9863	0.00336
0.9883	0.00905
0.9902	0.00458
0.9922	-0.00431
0.9941	-0.00734
0.9961	-0.00326
0.998	0.0061
1	0.0134
1.002	0.0171
1.0039	0.0179
1.0059	0.0149
1.0078	0.00472
1.0098	-0.00125
1.0117	0.00193
1.0137	0.0119
1.0156	0.0197
1.0176	0.0186
1.0195	0.0051
1.0215	-0.00761
1.0234	-0.0167
1.0254	-0.0195
1.0273	-0.0145
1.0293	-0.00334
1.0313	0.00734
1.0332	0.00757
1.0352	-0.000774
1.0371	-0.014
1.0391	-0.0201
1.041	-0.015
1.043	-0.000702
1.0449	0.0154
1.0469	0.0209
1.0488	0.0178
1.0508	0.0085
1.0527	-0.000724
1.0547	-0.0025
1.0566	0.00262
1.0586	0.0133
1.0605	0.0222
1.0625	0.0241
1.0645	0.0173
1.0664	0.00569
1.0684	-0.00726
1.0703	-0.0153
1.0723	-0.0131
1.0742	-0.0092
1.0762	-0.00282
1.0781	0.00193
1.0801	0.00269
1.082	-0.00217
1.084	-0.00989
1.0859	-0.0146
1.0879	-0.0135
1.0898	-0.0066
1.0918	0.00341
1.0938	0.0129
1.0957	0.0137
1.0977	0.00964
1.0996	0.00365
1.1016	0.00177
1.1035	0.00507
1.1055	0.00954
1.1074	0.0115
1.1094	0.0159
1.1113	0.0189
1.1133	0.0166
1.1152	0.00827
1.1172	-0.00557
1.1191	-0.0141
1.1211	-0.0118
1.123	-0.00426
1.125	0.000739
1.127	-0.000633
1.1289	-0.0039
1.1309	-0.00812
1.1328	-0.0119
1.1348	-0.0129
1.1367	-0.00697
1.1387	0.00168
1.1406	0.0115
1.1426	0.0139
1.1445	0.00862
1.1465	0.00241
1.1484	0.00065
1.1504	0.00578
1.1523	0.0129
1.1543	0.0167
1.1563	0.017
1.1582	0.0153
1.1602	0.00801
1.1621	0.000258
1.1641	-0.00615
1.166	-0.00616
1.168	-0.00418
1.1699	-0.0058
1.1719	-0.00672
1.1738	-0.00614
1.1758	-0.00361
1.1777	-0.00481
1.1797	-0.00822
1.1816	-0.00982
1.1836	-0.00639
1.1855	-0.00115
1.1875	0.0058
1.1895	0.00893
1.1914	0.00987
1.1934	0.0087
1.1953	0.00661
1.1973	0.00684
1.1992	0.00795
1.2012	0.0112
1.2031	0.0154
1.2051	0.0165
1.207	0.0121
1.209	0.00314
1.2109	-0.00793
1.2129	-0.01
1.2148	-0.00818
1.2168	-0.00492
1.2188	-0.00527
1.2207	-0.00579
1.2227	-0.00673
1.2246	-0.00926
1.2266	-0.00969
1.2285	-0.00443
1.2305	0.00252
1.2324	0.00851
1.2344	0.00739
1.2363	0.00452
1.2383	0.00427
1.2402	0.00693
1.2422	0.0127
1.2441	0.0144
1.2461	0.0128
1.248	0.012
1.25	0.00805
1.252	0.00356
1.2539	0.00087
1.2559	-0.00248
1.2578	-0.00245
1.2598	-0.00496
1.2617	-0.0079
1.2637	-0.00717
1.2656	-0.00549
1.2676	-0.0062
1.2695	-0.00912
1.2715	-0.00841
1.2734	-0.00393
1.2754	0.00384
1.2773	0.0106
1.2793	0.00998
1.2813	0.00571
1.2832	0.00417
1.2852	0.00651
1.2871	0.0128
1.2891	0.0152
1.291	0.0161
1.293	0.0136
1.2949	0.00789
1.2969	-0.000118
1.2988	-0.00888
1.3008	-0.00891
1.3027	-0.00642
1.3047	-0.00519
1.3066	-0.00429
1.3086	-0.00617
1.3105	-0.00872
1.3125	-0.0108
1.3145	-0.00882
1.3164	-0.0026
1.3184	0.0033
1.3203	0.00741
1.3223	0.00694
1.3242	0.00714
1.3262	0.00794
1.3281	0.0104
1.3301	0.0125
1.332	0.0101
1.334	0.00932
1.3359	0.00888
1.3379	0.00896
1.3398	0.0035
1.3418	-0.0053
1.3438	-0.00849
1.3457	-0.00685
1.3477	-0.00444
1.3496	-0.00663
1.3516	-0.0103
1.3535	-0.0117
1.3555	-0.00783
1.3574	-0.00184
1.3594	0.00224
1.3613	0.0077
1.3633	0.0096
1.3652	0.00718
1.3672	0.00221
1.3691	0.0038
1.3711	0.0133
1.373	0.0198
1.375	0.0189
1.377	0.00934
1.3789	-0.000282
1.3809	-0.00658
1.3828	-0.00747
1.3848	-0.00582
1.3867	-0.00521
1.3887	-0.00477
1.3906	-0.00423
1.3926	-0.00531
1.3945	-0.0102
1.3965	-0.0131
1.3984	-0.00915
1.4004	0.00114
1.4023	0.0101
1.4043	0.0106
1.4063	0.00713
1.4082	0.00677
1.4102	0.0112
1.4121	0.0114
1.4141	0.0086
1.416	0.00986
1.418	0.0118
1.4199	0.0098
1.4219	-0.0024
1.4238	-0.011
1.4258	-0.0091
1.4277	-0.00295
1.4297	-0.00381
1.4316	-0.0107
1.4336	-0.0148
1.4355	-0.0114
1.4375	-0.0023
1.4395	0.00425
1.4414	0.00769
1.4434	0.00755
1.4453	0.00568
1.4473	0.00281
1.4492	0.00418
1.4512	0.013
1.4531	0.0194
1.4551	0.0178
1.457	0.00679
1.459	-0.00411
1.4609	-0.00872
1.4629	-0.00552
1.4648	-0.00392
1.4668	-0.005
1.4688	-0.00443
1.4707	-0.00385
1.4727	-0.00749
1.4746	-0.0143
1.4766	-0.0135
1.4785	-0.00394
1.4805	0.0113
1.4824	0.0162
1.4844	0.0126
1.4863	0.00578
1.4883	0.00674
1.4902	0.0101
1.4922	0.0124
1.4941	0.0118
1.4961	0.00799
1.498	0.00341
1.5	-0.00286
1.502	-0.00605
1.5039	-0.0101
1.5059	-0.0107
1.5078	-0.0096
1.5098	-0.00896
1.5117	-0.0109
1.5137	-0.00599
1.5156	0.00255
1.5176	0.00991
1.5195	0.00619
1.5215	8.59e-06
1.5234	0.000321
1.5254	0.0113
1.5273	0.0203
1.5293	0.0184
1.5313	0.00954
1.5332	0.00189
1.5352	-0.00166
1.5371	-0.00629
1.5391	-0.00853
1.541	-0.0077
1.543	-0.00198
1.5449	-0.000671
1.5469	-0.00898
1.5488	-0.0187
1.5508	-0.0147
1.5527	-0.000914
1.5547	0.0135
1.5566	0.0152
1.5586	0.00902
1.5605	0.00391
1.5625	0.00781
1.5645	0.0127
1.5664	0.0143
1.5684	0.0104
1.5703	0.00453
1.5723	-0.00286
1.5742	-0.00621
1.5762	-0.00742
1.5781	-0.00873
1.5801	-0.00878
1.582	-0.00845
1.584	-0.0107
1.5859	-0.0104
1.5879	-0.00315
1.5898	0.00543
1.5918	0.0089
1.5938	0.00504
1.5957	0.0027
1.5977	0.0089
1.5996	0.0161
1.6016	0.0151
1.6035	0.0101
1.6055	0.00596
1.6074	0.00138
1.6094	-0.00723
1.6113	-0.0112
1.6133	-0.00823
1.6152	-0.00203
1.6172	-0.00319
1.6191	-0.0152
1.6211	-0.0205
1.623	-0.0089
1.625	0.00956
1.627	0.0165
1.6289	0.0108
1.6309	0.005
1.6328	0.00706
1.6348	0.0125
1.6367	0.0136
1.6387	0.0097
1.6406	0.00239
1.6426	-0.0038
1.6445	-0.00427
1.6465	-0.00245
1.6484	-0.00782
1.6504	-0.0114
1.6523	-0.0107
1.6543	-0.00819
1.6563	-0.00771
1.6582	-0.00617
1.6602	0.00317
1.6621	0.0133
1.6641	0.0143
1.666	0.00759
1.668	0.00517
1.6699	0.0111
1.6719	0.0165
1.6738	0.0106
1.6758	-0.00186
1.6777	-0.00838
1.6797	-0.00421
1.6816	-0.00196
1.6836	-0.00786
1.6855	-0.0131
1.6875	-0.0156
1.6895	-0.0122
1.6914	-0.00253
1.6934	0.00821
1.6953	0.0125
1.6973	0.00913
1.6992	0.00407
1.7012	0.00669
1.7031	0.013
1.7051	0.0153
1.707	0.00834
1.709	-0.00184
1.7109	-0.00674
1.7129	-0.00464
1.7148	-0.0034
1.7168	-0.00768
1.7188	-0.0102
1.7207	-0.0125
1.7227	-0.0135
1.7246	-0.00961
1.7266	0.00276
1.7285	0.0161
1.7305	0.0183
1.7324	0.00824
1.7344	0.00281
1.7363	0.00943
1.7383	0.0167
1.7402	0.0104
1.7422	-0.00511
1.7441	-0.0113
1.7461	-0.00288
1.748	-0.0004
1.75	-0.00932
1.752	-0.0164
1.7539	-0.0157
1.7559	-0.00791
1.7578	0.000558
1.7598	0.0071
1.7617	0.0095
1.7637	0.0096
1.7656	0.0105
1.7676	0.0116
1.7695	0.0113
1.7715	0.00817
1.7734	0.0028
1.7754	-0.00412
1.7773	-0.00661
1.7793	-0.00357
1.7813	-0.00441
1.7832	-0.00786
1.7852	-0.015
1.7871	-0.0182
1.7891	-0.0108
1.791	0.00457
1.793	0.0162
1.7949	0.0176
1.7969	0.0113
1.7988	0.00761
1.8008	0.0111
1.8027	0.0124
1.8047	0.00152
1.8066	-0.0133
1.8086	-0.0107
1.8105	0.00459
1.8125	0.00477
1.8145	-0.00889
1.8164	-0.0213
1.8184	-0.0167
1.8203	-0.00503
1.8223	0.00103
1.8242	0.00545
1.8262	0.0138
1.8281	0.0215
1.8301	0.019
1.832	0.00749
1.834	0.00125
1.8359	-0.00103
1.8379	-0.00606
1.8398	-0.00818
1.8418	-0.00239
1.8438	0.00245
1.8457	-0.00249
1.8477	-0.0187
1.8496	-0.0263
1.8516	-0.0122
1.8535	0.00832
1.8555	0.0172
1.8574	0.015
1.8594	0.0148
1.8613	0.0181
1.8633	0.0139
1.8652	-0.000867
1.8672	-0.0162
1.8691	-0.0159
1.8711	2.15e-06
1.873	0.00802
1.875	0.00159
1.877	-0.00887
1.8789	-0.018
1.8809	-0.0203
1.8828	-0.0139
1.8848	0.00303
1.8867	0.0199
1.8887	0.0258
1.8906	0.0213
1.8926	0.0148
1.8945	0.00915
1.8965	-0.00581
1.8984	-0.0234
1.9004	-0.0201
1.9023	0.00147
1.9043	0.0127
1.9063	0.000992
1.9082	-0.0196
1.9102	-0.0206
1.9121	-0.00644
1.9141	0.000821
1.916	-0.00158
1.918	0.00994
1.9199	0.0322
1.9219	0.0358
1.9238	0.01
1.9258	-0.0148
1.9277	-0.0208
1.9297	-0.0114
1.9316	-0.00458
1.9336	-0.00443
1.9355	0.00195
1.9375	0.00283
1.9395	-0.0101
1.9414	-0.0224
1.9434	-0.0137
1.9453	0.00985
1.9473	0.0234
1.9492	0.0197
1.9512	0.0189
1.9531	0.0228
1.9551	0.00824
1.957	-0.0264
1.959	-0.0373
1.9609	-0.0113
1.9629	0.0139
1.9648	0.00795
1.9668	-0.0127
1.9688	-0.0126
1.9707	-0.000164
1.9727	-0.00192
1.9746	-0.0115
1.9766	0.00267
1.9785	0.0334
1.9805	0.041
1.9824	0.0165
1.9844	-0.0121
1.9863	-0.021
1.9883	-0.0159
1.9902	-0.0144
1.9922	-0.0125
1.9941	-0.00264
1.9961	0.00502
1.998	0.00253
2	-0.00545
2.002	-0.00562
2.0039	0.00215
2.0059	0.0116
2.0078	0.019
2.0098	0.024
2.0117	0.0183
2.0137	-0.00624
2.0156	-0.0244
2.0176	-0.0197
2.0195	-0.00822
2.0215	-0.00521
2.0234	-0.00932
2.0254	-0.00452
2.0273	0.00583
2.0293	0.00779
2.0313	0.000317
2.0332	0.0017
2.0352	0.0148
2.0371	0.0252
2.0391	0.0178
2.041	-0.00396
2.043	-0.0168
2.0449	-0.0118
2.0469	-0.00806
2.0488	-0.0131
2.0508	-0.0177
2.0527	-0.00855
2.0547	0.00924
2.0566	0.0118
2.0586	-0.000162
2.0605	0.000279
2.0625	0.0171
2.0645	0.0251
2.0664	0.011
2.0684	-0.00903
2.0703	-0.0143
2.0723	-0.00342
2.0742	-0.00423
2.0762	-0.0144
2.0781	-0.017
2.0801	-0.00617
2.082	0.00266
2.084	0.00253
2.0859	0.00391
2.0879	0.014
2.0898	0.0223
2.0918	0.0183
2.0938	0.00803
2.0957	-0.00672
2.0977	-0.0155
2.0996	-0.0118
2.1016	-0.00709
2.1035	-0.00697
2.1055	-0.0103
2.1074	-0.00688
2.1094	0.00166
2.1113	0.00302
2.1133	0.000588
2.1152	0.00944
2.1172	0.023
2.1191	0.0245
2.1211	0.00931
2.123	-0.0119
2.125	-0.0181
2.127	-0.0104
2.1289	-0.00743
2.1309	-0.0117
2.1328	-0.0137
2.1348	-0.00294
2.1367	0.00783
2.1387	0.00781
2.1406	0.00361
2.1426	0.00838
2.1445	0.02
2.1465	0.0214
2.1484	0.00305
2.1504	-0.0196
2.1523	-0.0171
2.1543	-0.00381
2.1563	-0.00446
2.1582	-0.0155
2.1602	-0.0147
2.1621	0.00174
2.1641	0.0107
2.166	0.00527
2.168	0.00532
2.1699	0.0174
2.1719	0.0249
2.1738	0.0131
2.1758	-0.0115
2.1777	-0.021
2.1797	-0.0107
2.1816	-0.00497
2.1836	-0.0111
2.1855	-0.0176
2.1875	-0.00508
2.1895	0.0111
2.1914	0.00989
2.1934	0.00175
2.1953	0.00969
2.1973	0.023
2.1992	0.02
2.2012	-0.00493
2.2031	-0.0218
2.2051	-0.012
2.207	-0.00133
2.209	-0.00796
2.2109	-0.0175
2.2129	-0.00935
2.2148	0.00595
2.2168	0.00946
2.2188	0.00585
2.2207	0.0112
2.2227	0.0214
2.2246	0.0207
2.2266	0.000748
2.2285	-0.0205
2.2305	-0.017
2.2324	-0.00631
2.2344	-0.00738
2.2363	-0.0155
2.2383	-0.00851
2.2402	0.00739
2.2422	0.00946
2.2441	0.00234
2.2461	0.00961
2.248	0.023
2.25	0.0193
2.252	-0.00201
2.2539	-0.0183
2.2559	-0.0122
2.2578	-0.00492
2.2598	-0.0108
2.2617	-0.0185
2.2637	-0.00767
2.2656	0.00691
2.2676	0.00851
2.2695	0.00628
2.2715	0.0138
2.2734	0.0233
2.2754	0.0174
2.2773	-0.00721
2.2793	-0.0229
2.2813	-0.0121
2.2832	-0.00328
2.2852	-0.0106
2.2871	-0.0162
2.2891	-0.0032
2.291	0.0101
2.293	0.00513
2.2949	0.00105
2.2969	0.0154
2.2988	0.0281
2.3008	0.0163
2.3027	-0.0118
2.3047	-0.02
2.3066	-0.008
2.3086	-0.00571
2.3105	-0.0185
2.3125	-0.02
2.3145	0.00322
2.3164	0.0179
2.3184	0.00752
2.3203	0.00176
2.3223	0.0166
2.3242	0.0272
2.3262	0.00749
2.3281	-0.025
2.3301	-0.0213
2.332	0.000475
2.334	0.000553
2.3359	-0.0181
2.3379	-0.0171
2.3398	0.00533
2.3418	0.0158
2.3438	0.00609
2.3457	0.00584
2.3477	0.0214
2.3496	0.0263
2.3516	-0.000852
2.3535	-0.026
2.3555	-0.0193
2.3574	-0.00376
2.3594	-0.00832
2.3613	-0.0186
2.3633	-0.0034
2.3652	0.0168
2.3672	0.0149
2.3691	0.00519
2.3711	0.0115
2.373	0.0207
2.375	0.00828
2.377	-0.0178
2.3789	-0.0198
2.3809	-0.00533
2.3828	-0.00234
2.3848	-0.0159
2.3867	-0.0149
2.3887	0.0028
2.3906	0.0152
2.3926	0.0136
2.3945	0.0124
2.3965	0.0194
2.3984	0.0166
2.4004	-0.00972
2.4023	-0.0264
2.4043	-0.0184
2.4063	-0.00683
2.4082	-0.00768
2.4102	-0.00874
2.4121	0.00281
2.4141	0.0112
2.416	0.0123
2.418	0.0132
2.4199	0.0144
2.4219	0.0114
2.4238	-0.00347
2.4258	-0.0132
2.4277	-0.0132
2.4297	-0.011
2.4316	-0.0142
2.4336	-0.0121
2.4355	0.000451
2.4375	0.00867
2.4395	0.0121
2.4414	0.0185
2.4434	0.0218
2.4453	0.0127
2.4473	-0.011
2.4492	-0.0223
2.4512	-0.0131
2.4531	-0.00868
2.4551	-0.0113
2.457	-0.00795
2.459	0.0055
2.4609	0.0105
2.4629	0.00751
2.4648	0.011
2.4668	0.0186
2.4688	0.0154
2.4707	-0.00504
2.4727	-0.0166
2.4746	-0.0113
2.4766	-0.00866
2.4785	-0.0179
2.4805	-0.016
2.4824	0.00468
2.4844	0.015
2.4863	0.0132
2.4883	0.0162
2.4902	0.0213
2.4922	0.012
2.4941	-0.0146
2.4961	-0.0245
2.498	-0.0125
2.5	-0.00432
2.502	-0.00959
2.5039	-0.00911
2.5059	0.00331
2.5078	0.0105
2.5098	0.0123
2.5117	0.0141
2.5137	0.0172
2.5156	0.0109
2.5176	-0.00925
2.5195	-0.0167
2.5215	-0.0143
2.5234	-0.0145
2.5254	-0.0157
2.5273	-0.00493
2.5293	0.00916
2.5313	0.0119
2.5332	0.0157
2.5352	0.0219
2.5371	0.0178
2.5391	-0.0041
2.541	-0.0215
2.543	-0.0153
2.5449	-0.00679
2.5469	-0.0114
2.5488	-0.0143
2.5508	-4.73e-05
2.5527	0.0109
2.5547	0.00947
2.5566	0.0115
2.5586	0.02
2.5605	0.0183
2.5625	-0.00612
2.5645	-0.0213
2.5664	-0.0144
2.5684	-0.00999
2.5703	-0.0148
2.5723	-0.0113
2.5742	0.00522
2.5762	0.0145
2.5781	0.0166
2.5801	0.0176
2.582	0.0173
2.584	0.00385
2.5859	-0.015
2.5879	-0.0175
2.5898	-0.0106
2.5918	-0.0119
2.5938	-0.0145
2.5957	-0.00206
2.5977	0.00957
2.5996	0.00944
2.6016	0.015
2.6035	0.0222
2.6055	0.0166
2.6074	-0.00861
2.6094	-0.0216
2.6113	-0.0131
2.6133	-0.00957
2.6152	-0.0154
2.6172	-0.0103
2.6191	0.00627
2.6211	0.013
2.623	0.0144
2.625	0.0175
2.627	0.0185
2.6289	0.0033
2.6309	-0.0175
2.6328	-0.0172
2.6348	-0.0115
2.6367	-0.0141
2.6387	-0.0141
2.6406	0.000783
2.6426	0.0105
2.6445	0.0121
2.6465	0.0191
2.6484	0.0226
2.6504	0.0096
2.6523	-0.0147
2.6543	-0.0197
2.6563	-0.0115
2.6582	-0.012
2.6602	-0.0164
2.6621	-0.00444
2.6641	0.0105
2.666	0.0115
2.668	0.0133
2.6699	0.0199
2.6719	0.0182
2.6738	-0.00597
2.6758	-0.0216
2.6777	-0.0152
2.6797	-0.0104
2.6816	-0.0139
2.6836	-0.00934
2.6855	0.0051
2.6875	0.0123
2.6895	0.0184
2.6914	0.0215
2.6934	0.0154
2.6953	-0.00474
2.6973	-0.0181
2.6992	-0.0133
2.7012	-0.0127
2.7031	-0.0185
2.7051	-0.0108
2.707	0.00857
2.709	0.0116
2.7109	0.0104
2.7129	0.0197
2.7148	0.0234
2.7168	0.00177
2.7188	-0.0231
2.7207	-0.0193
2.7227	-0.00851
2.7246	-0.0109
2.7266	-0.0127
2.7285	0.000827
2.7305	0.0121
2.7324	0.0176
2.7344	0.0188
2.7363	0.0161
2.7383	0.00135
2.7402	-0.0147
2.7422	-0.0142
2.7441	-0.0144
2.7461	-0.0195
2.748	-0.0129
2.75	0.00721
2.752	0.011
2.7539	0.0112
2.7559	0.0222
2.7578	0.0257
2.7598	0.00215
2.7617	-0.0241
2.7637	-0.0203
2.7656	-0.0087
2.7676	-0.0131
2.7695	-0.0137
2.7715	0.00349
2.7734	0.0149
2.7754	0.0175
2.7773	0.0172
2.7793	0.0159
2.7813	0.000842
2.7832	-0.0162
2.7852	-0.0167
2.7871	-0.0155
2.7891	-0.0158
2.791	-0.0072
2.793	0.00653
2.7949	0.00787
2.7969	0.0147
2.7988	0.0266
2.8008	0.0206
2.8027	-0.0081
2.8047	-0.0241
2.8066	-0.0128
2.8086	-0.00873
2.8105	-0.019
2.8125	-0.0119
2.8145	0.0105
2.8164	0.0175
2.8184	0.0167
2.8203	0.0179
2.8223	0.0147
2.8242	-0.00655
2.8262	-0.0209
2.8281	-0.0178
2.8301	-0.0149
2.832	-0.0115
2.834	0.000487
2.8359	0.00868
2.8379	0.0108
2.8398	0.0209
2.8418	0.0252
2.8438	0.00656
2.8457	-0.0202
2.8477	-0.0185
2.8496	-0.00851
2.8516	-0.0159
2.8535	-0.0198
2.8555	0.00155
2.8574	0.016
2.8594	0.0169
2.8613	0.0193
2.8633	0.02
2.8652	0.00286
2.8672	-0.019
2.8691	-0.0202
2.8711	-0.0151
2.873	-0.0145
2.875	-0.00636
2.877	0.00719
2.8789	0.0113
2.8809	0.0185
2.8828	0.025
2.8848	0.015
2.8867	-0.0131
2.8887	-0.0212
2.8906	-0.0121
2.8926	-0.0145
2.8945	-0.0191
2.8965	-0.00293
2.8984	0.014
2.9004	0.0174
2.9023	0.0212
2.9043	0.0213
2.9063	0.00422
2.9082	-0.0189
2.9102	-0.0194
2.9121	-0.0139
2.9141	-0.0161
2.916	-0.01
2.918	0.00781
2.9199	0.0131
2.9219	0.0169
2.9238	0.0229
2.9258	0.0163
2.9277	-0.0104
2.9297	-0.0226
2.9316	-0.015
2.9336	-0.0141
2.9355	-0.016
2.9375	-0.00182
2.9395	0.0115
2.9414	0.0171
2.9434	0.0229
2.9453	0.0215
2.9473	6.8e-05
2.9492	-0.0206
2.9512	-0.0166
2.9531	-0.0133
2.9551	-0.0209
2.957	-0.0114
2.959	0.0108
2.9609	0.0163
2.9629	0.0197
2.9648	0.0238
2.9668	0.0131
2.9688	-0.0144
2.9707	-0.0232
2.9727	-0.0167
2.9746	-0.0161
2.9766	-0.0122
2.9785	0.00448
2.9805	0.0115
2.9824	0.0175
2.9844	0.0257
2.9863	0.0195
2.9883	-0.00907
2.9902	-0.0217
2.9922	-0.0136
2.9941	-0.0155
2.9961	-0.0209
2.998	-0.00447
3	0.0137
3.002	0.0196
3.0039	0.0245
3.0059	0.0217
3.0078	-0.000206
3.0098	-0.0205
3.0117	-0.0177
3.0137	-0.0162
3.0156	-0.0196
3.0176	-0.00494
3.0195	0.012
3.0215	0.0162
3.0234	0.0218
3.0254	0.0241
3.0273	0.00559
3.0293	-0.0198
3.0313	-0.0202
3.0332	-0.0159
3.0352	-0.0185
3.0371	-0.00882
3.0391	0.00859
3.041	0.0151
3.043	0.0233
3.0449	0.0264
3.0469	0.00702
3.0488	-0.019
3.0508	-0.0187
3.0527	-0.0133
3.0547	-0.0211
3.0566	-0.0154
3.0586	0.0078
3.0605	0.0177
3.0625	0.0231
3.0645	0.0255
3.0664	0.0101
3.0684	-0.0161
3.0703	-0.0209
3.0723	-0.017
3.0742	-0.0212
3.0762	-0.0109
3.0781	0.00905
3.0801	0.0152
3.082	0.021
3.084	0.0267
3.0859	0.0107
3.0879	-0.0181
3.0898	-0.0208
3.0918	-0.015
3.0938	-0.0205
3.0957	-0.014
3.0977	0.00639
3.0996	0.0173
3.1016	0.026
3.1035	0.0283
3.1055	0.00718
3.1074	-0.0203
3.1094	-0.0203
3.1113	-0.0144
3.1133	-0.021
3.1152	-0.0112
3.1172	0.00977
3.1191	0.0179
3.1211	0.0248
3.123	0.0249
3.125	0.00402
3.127	-0.0199
3.1289	-0.0183
3.1309	-0.0174
3.1328	-0.0222
3.1348	-0.00821
3.1367	0.0117
3.1387	0.0194
3.1406	0.0271
3.1426	0.0245
3.1445	-0.00205
3.1465	-0.0228
3.1484	-0.0177
3.1504	-0.0168
3.1523	-0.0224
3.1543	-0.00435
3.1563	0.0128
3.1582	0.022
3.1602	0.0298
3.1621	0.0214
3.1641	-0.00938
3.166	-0.0249
3.168	-0.0168
3.1699	-0.0195
3.1719	-0.0171
3.1738	0.00227
3.1758	0.0158
3.1777	0.0243
3.1797	0.0295
3.1816	0.0115
3.1836	-0.0186
3.1855	-0.0215
3.1875	-0.0144
3.1895	-0.0219
3.1914	-0.0158
3.1934	0.0066
3.1953	0.0199
3.1973	0.03
3.1992	0.0281
3.2012	-1.18e-05
3.2031	-0.0238
3.2051	-0.0188
3.207	-0.0174
3.209	-0.0219
3.2109	-0.00454
3.2129	0.0133
3.2148	0.0231
3.2168	0.0306
3.2188	0.0189
3.2207	-0.0129
3.2227	-0.0244
3.2246	-0.0164
3.2266	-0.0217
3.2285	-0.0177
3.2305	0.00385
3.2324	0.0185
3.2344	0.0299
3.2363	0.0316
3.2383	0.00424
3.2402	-0.0248
3.2422	-0.0205
3.2441	-0.0161
3.2461	-0.0228
3.248	-0.00787
3.25	0.0108
3.252	0.0243
3.2539	0.0348
3.2559	0.0219
3.2578	-0.0139
3.2598	-0.0267
3.2617	-0.0175
3.2637	-0.0217
3.2656	-0.0159
3.2676	0.00447
3.2695	0.0202
3.2715	0.0322
3.2734	0.0311
3.2754	-0.000753
3.2773	-0.0266
3.2793	-0.0189
3.2813	-0.0181
3.2832	-0.0239
3.2852	-0.00612
3.2871	0.0142
3.2891	0.0292
3.291	0.0377
3.293	0.0145
3.2949	-0.0224
3.2969	-0.0257
3.2988	-0.0166
3.3008	-0.0226
3.3027	-0.0116
3.3047	0.00935
3.3066	0.0234
3.3086	0.0349
3.3105	0.0247
3.3125	-0.0117
3.3145	-0.0268
3.3164	-0.0184
3.3184	-0.0222
3.3203	-0.019
3.3223	0.00282
3.3242	0.0198
3.3262	0.0357
3.3281	0.0342
3.3301	-0.00216
3.332	-0.0293
3.334	-0.0203
3.3359	-0.0192
3.3379	-0.0215
3.3398	-0.00363
3.3418	0.0139
3.3438	0.0331
3.3457	0.0397
3.3477	0.00928
3.3496	-0.0277
3.3516	-0.0253
3.3535	-0.0201
3.3555	-0.0223
3.3574	-0.00725
3.3594	0.0117
3.3613	0.0306
3.3633	0.0429
3.3652	0.015
3.3672	-0.0257
3.3691	-0.0271
3.3711	-0.0186
3.373	-0.0236
3.375	-0.0116
3.377	0.00847
3.3789	0.0297
3.3809	0.0454
3.3828	0.022
3.3848	-0.0241
3.3867	-0.0318
3.3887	-0.0197
3.3906	-0.0211
3.3926	-0.00927
3.3945	0.00822
3.3965	0.0257
3.3984	0.0429
3.4004	0.0237
3.4023	-0.0217
3.4043	-0.0316
3.4063	-0.0212
3.4082	-0.0224
3.4102	-0.0113
3.4121	0.00681
3.4141	0.0254
3.416	0.0448
3.418	0.0263
3.4199	-0.0217
3.4219	-0.0334
3.4238	-0.0211
3.4258	-0.021
3.4277	-0.00926
3.4297	0.00558
3.4316	0.0242
3.4336	0.0441
3.4355	0.0275
3.4375	-0.0206
3.4395	-0.0339
3.4414	-0.0252
3.4434	-0.0221
3.4453	-0.00719
3.4473	0.00824
3.4492	0.0251
3.4512	0.0449
3.4531	0.0242
3.4551	-0.0232
3.457	-0.0323
3.459	-0.0251
3.4609	-0.0238
3.4629	-0.00673
3.4648	0.00941
3.4668	0.0293
3.4688	0.0467
3.4707	0.0209
3.4727	-0.0271
3.4746	-0.0336
3.4766	-0.0286
3.4785	-0.0213
3.4805	0.000296
3.4824	0.0148
3.4844	0.0326
3.4863	0.0432
3.4883	0.0102
3.4902	-0.0297
3.4922	-0.0315
3.4941	-0.0312
3.4961	-0.0226
3.498	0.00311
3.5	0.0212
3.502	0.0406
3.5039	0.0413
3.5059	-0.00164
3.5078	-0.0352
3.5098	-0.0302
3.5117	-0.0319
3.5137	-0.017
3.5156	0.00884
3.5176	0.0277
3.5195	0.045
3.5215	0.0327
3.5234	-0.0147
3.5254	-0.0344
3.5273	-0.0306
3.5293	-0.0328
3.5313	-0.0115
3.5332	0.0157
3.5352	0.0375
3.5371	0.0488
3.5391	0.0178
3.541	-0.0301
3.543	-0.0317
3.5449	-0.0286
3.5469	-0.0308
3.5488	-0.00763
3.5508	0.0207
3.5527	0.0499
3.5547	0.0501
3.5566	-0.000365
3.5586	-0.0403
3.5605	-0.0309
3.5625	-0.0291
3.5645	-0.0218
3.5664	0.00204
3.5684	0.031
3.5703	0.0584
3.5723	0.0376
3.5742	-0.0234
3.5762	-0.0427
3.5781	-0.0287
3.5801	-0.0295
3.582	-0.0157
3.584	0.00936
3.5859	0.0473
3.5879	0.0657
3.5898	0.0168
3.5918	-0.0446
3.5938	-0.0417
3.5957	-0.0272
3.5977	-0.0206
3.5996	-0.00535
3.6016	0.02
3.6035	0.062
3.6055	0.0576
3.6074	-0.0114
3.6094	-0.0521
3.6113	-0.0399
3.6133	-0.0278
3.6152	-0.0112
3.6172	0.00475
3.6191	0.0395
3.6211	0.0721
3.623	0.0312
3.625	-0.0403
3.627	-0.0515
3.6289	-0.0362
3.6309	-0.0196
3.6328	-0.00356
3.6348	0.0176
3.6367	0.0629
3.6387	0.0659
3.6406	-0.00572
3.6426	-0.0567
3.6445	-0.0502
3.6465	-0.0303
3.6484	-0.00484
3.6504	0.00732
3.6523	0.0402
3.6543	0.0742
3.6563	0.0326
3.6582	-0.0405
3.6602	-0.0586
3.6621	-0.0461
3.6641	-0.0181
3.666	0.0027
3.668	0.025
3.6699	0.0703
3.6719	0.0629
3.6738	-0.0133
3.6758	-0.0603
3.6777	-0.0583
3.6797	-0.0302
3.6816	0.000562
3.6836	0.0132
3.6855	0.0517
3.6875	0.0768
3.6895	0.0223
3.6914	-0.0469
3.6934	-0.068
3.6953	-0.0505
3.6973	-0.00828
3.6992	0.0122
3.7012	0.0375
3.7031	0.0756
3.7051	0.0481
3.707	-0.0251
3.709	-0.0649
3.7109	-0.0652
3.7129	-0.0247
3.7148	0.0083
3.7168	0.0286
3.7188	0.0691
3.7207	0.0674
3.7227	-0.000512
3.7246	-0.0568
3.7266	-0.0763
3.7285	-0.0437
3.7305	0.00473
3.7324	0.0262
3.7344	0.0598
3.7363	0.0722
3.7383	0.02
3.7402	-0.0388
3.7422	-0.0758
3.7441	-0.0666
3.7461	-0.0137
3.748	0.0238
3.75	0.0604
3.752	0.0796
3.7539	0.0337
3.7559	-0.0267
3.7578	-0.0694
3.7598	-0.0768
3.7617	-0.0291
3.7637	0.0141
3.7656	0.0558
3.7676	0.0843
3.7695	0.0483
3.7715	-0.0146
3.7734	-0.0623
3.7754	-0.0856
3.7773	-0.0476
3.7793	0.00426
3.7813	0.0535
3.7832	0.0907
3.7852	0.059
3.7871	-0.00565
3.7891	-0.0536
3.791	-0.0858
3.793	-0.0607
3.7949	-0.0113
3.7969	0.046
3.7988	0.0968
3.8008	0.0747
3.8027	0.00391
3.8047	-0.0522
3.8066	-0.089
3.8086	-0.0686
3.8105	-0.0199
3.8125	0.0369
3.8145	0.0957
3.8164	0.0842
3.8184	0.0172
3.8203	-0.0439
3.8223	-0.0915
3.8242	-0.0818
3.8262	-0.0327
3.8281	0.0316
3.8301	0.101
3.832	0.0963
3.834	0.027
3.8359	-0.0403
3.8379	-0.0935
3.8398	-0.0856
3.8418	-0.0415
3.8438	0.0223
3.8457	0.0992
3.8477	0.105
3.8496	0.0416
3.8516	-0.0341
3.8535	-0.1
3.8555	-0.0994
3.8574	-0.0503
3.8594	0.0216
3.8613	0.102
3.8633	0.109
3.8652	0.0503
3.8672	-0.026
3.8691	-0.101
3.8711	-0.109
3.873	-0.0637
3.875	0.0185
3.877	0.109
3.8789	0.117
3.8809	0.0575
3.8828	-0.0243
3.8848	-0.106
3.8867	-0.117
3.8887	-0.0714
3.8906	0.0177
3.8926	0.113
3.8945	0.121
3.8965	0.0663
3.8984	-0.0216
3.9004	-0.113
3.9023	-0.13
[truncated: 2,098 more rows]
