# Supplementary material for: Effect of the Supports’ Positions on the Vibration Characteristics of a Flexible Rotor Shafting
Source: Hindawi journal article supplement (doi:10.1155/2020/1592794), 2020-02-12
Supplement: f1 [file 1592794.f1.zip › 1592794.f1/test_data/read_data.m]

clf;
[date_Table10_1]=xlsread('F:\The state of postgraduate\post2\Ð¡ÂÛÎÄ-Ó¢ÎÄ\supplementary information file\test_data\Table10_1.xlsx',1);
x=date_Table10_1(:,1);%µÚÒ»ÁÐ
y=date_Table10_1(:,2);%µÚ¶þÁÐ
% ylim([-0.6 0.6])
hold on
xlabel('Time t/s','FontSize',15);
plot(x,y)%»æÖÆÇúÏß
ylabel('Vibration deformation amount u/mm','FontSize',15)

%title('1')
% \Theta appears as a Greek symbol (see String)
% Annotate the point (-pi/4, sin(-pi/4))
%text(-pi/4,sin(-pi/4),'\leftarrow sin(-\pi\div4)',...
 %    'HorizontalAlignment','left')
% Change the line color to red and
% set the line width to 2 points 
%set(p,'Color','red','LineWidth',2)

set(gca,'FontSize',13);
box on;
