# Supplementary material for: Effect of the Supports’ Positions on the Vibration Characteristics of a Flexible Rotor Shafting
Source: Hindawi journal article supplement (doi:10.1155/2020/1592794), 2020-02-12
Supplement: f1 [file 1592794.f1.zip › 1592794.f1/test_data/Table10_1.xlsx]

## Sheet: Sheet1
Time t/s	vibration deformation amount u/mm
0	0.000741
0.002	0.00125
0.0039	0.000243
0.0059	0.00117
0.0078	0.00126
0.0098	0.00108
0.0117	0.00148
0.0137	0.00167
0.0156	0.00142
0.0176	0.0015
0.0195	0.00148
0.0215	0.0015
0.0234	0.00162
0.0254	0.00209
0.0273	0.00256
0.0293	0.00245
0.0313	0.00301
0.0332	0.00334
0.0352	0.00285
0.0371	0.00305
0.0391	0.00386
0.041	0.00364
0.043	0.0039
0.0449	0.00365
0.0469	0.00419
0.0488	0.00458
0.0508	0.00449
0.0527	0.00481
0.0547	0.00502
0.0566	0.00516
0.0586	0.00531
0.0605	0.00604
0.0625	0.00664
0.0645	0.00699
0.0664	0.00767
0.0684	0.00856
0.0703	0.00904
0.0723	0.00938
0.0742	0.00896
0.0762	0.0087
0.0781	0.0084
0.0801	0.00871
0.082	0.00911
0.084	0.00965
0.0859	0.0106
0.0879	0.011
0.0898	0.0115
0.0918	0.012
0.0938	0.0118
0.0957	0.0117
0.0977	0.0123
0.0996	0.0129
0.1016	0.014
0.1035	0.0148
0.1055	0.016
0.1074	0.0157
0.1094	0.0157
0.1113	0.0159
0.1133	0.0165
0.1152	0.0176
0.1172	0.0183
0.1191	0.0195
0.1211	0.0205
0.123	0.0212
0.125	0.021
0.127	0.0214
0.1289	0.0214
0.1309	0.0217
0.1328	0.0221
0.1348	0.0228
0.1367	0.0232
0.1387	0.0237
0.1406	0.0238
0.1426	0.0234
0.1445	0.0229
0.1465	0.023
0.1484	0.0231
0.1504	0.0227
0.1523	0.0232
0.1543	0.0231
0.1563	0.0228
0.1582	0.0226
0.1602	0.0218
0.1621	0.0209
0.1641	0.0211
0.166	0.0221
0.168	0.0222
0.1699	0.0206
0.1719	0.0173
0.1738	0.0136
0.1758	0.0126
0.1777	0.0131
0.1797	0.0141
0.1816	0.0136
0.1836	0.0119
0.1855	0.0102
0.1875	0.00891
0.1895	0.0072
0.1914	0.00379
0.1934	-0.00117
0.1953	-0.00532
0.1973	-0.0062
0.1992	-0.00464
0.2012	-0.00206
0.2031	-0.00206
0.2051	-0.00448
0.207	-0.00724
0.209	-0.0101
0.2109	-0.0119
0.2129	-0.0133
0.2148	-0.0131
0.2168	-0.0121
0.2188	-0.0106
0.2207	-0.0102
0.2227	-0.0135
0.2246	-0.0177
0.2266	-0.0202
0.2285	-0.0208
0.2305	-0.0196
0.2324	-0.0188
0.2344	-0.0182
0.2363	-0.0182
0.2383	-0.0182
0.2402	-0.0193
0.2422	-0.0205
0.2441	-0.022
0.2461	-0.0225
0.248	-0.0213
0.25	-0.0205
0.252	-0.0211
0.2539	-0.0234
0.2559	-0.0265
0.2578	-0.0289
0.2598	-0.0303
0.2617	-0.0317
0.2637	-0.0326
0.2656	-0.033
0.2676	-0.0333
0.2695	-0.0351
0.2715	-0.0376
0.2734	-0.0408
0.2754	-0.0418
0.2773	-0.0406
0.2793	-0.0383
0.2813	-0.0361
0.2832	-0.0345
0.2852	-0.033
0.2871	-0.0304
0.2891	-0.0279
0.291	-0.0253
0.293	-0.023
0.2949	-0.0204
0.2969	-0.0177
0.2988	-0.0152
0.3008	-0.0135
0.3027	-0.0132
0.3047	-0.0126
0.3066	-0.0118
0.3086	-0.0102
0.3105	-0.00983
0.3125	-0.0111
0.3145	-0.0142
0.3164	-0.0175
0.3184	-0.0177
0.3203	-0.0144
0.3223	-0.00846
0.3242	-0.00251
0.3262	0.00289
0.3281	0.00724
0.3301	0.0112
0.332	0.0146
0.334	0.0165
0.3359	0.0187
0.3379	0.0226
0.3398	0.0278
0.3418	0.0322
0.3438	0.034
0.3457	0.0314
0.3477	0.0246
0.3496	0.0154
0.3516	0.00402
0.3535	-0.00617
0.3555	-0.013
0.3574	-0.0145
0.3594	-0.0117
0.3613	-0.00747
0.3633	-0.00709
0.3652	-0.0112
0.3672	-0.0176
0.3691	-0.0225
0.3711	-0.0227
0.373	-0.0196
0.375	-0.0133
0.377	-0.00786
0.3789	-0.00559
0.3809	-0.00949
0.3828	-0.0201
0.3848	-0.0346
0.3867	-0.0467
0.3887	-0.0504
0.3906	-0.0451
0.3926	-0.0355
0.3945	-0.0274
0.3965	-0.0255
0.3984	-0.0287
0.4004	-0.0341
0.4023	-0.037
0.4043	-0.0354
0.4063	-0.0291
0.4082	-0.0195
0.4102	-0.0103
0.4121	-0.00636
0.4141	-0.00829
0.416	-0.0149
0.418	-0.0216
0.4199	-0.0233
0.4219	-0.019
0.4238	-0.00962
0.4258	0.000779
0.4277	0.0106
0.4297	0.0169
0.4316	0.0175
0.4336	0.0149
0.4355	0.0113
0.4375	0.0111
0.4395	0.0148
0.4414	0.0219
0.4434	0.0274
0.4453	0.0285
0.4473	0.0248
0.4492	0.0183
0.4512	0.0101
0.4531	0.000892
0.4551	-0.00641
0.457	-0.0113
0.459	-0.0151
0.4609	-0.0171
0.4629	-0.0191
0.4648	-0.0195
0.4668	-0.0194
0.4688	-0.0182
0.4707	-0.0147
0.4727	-0.0126
0.4746	-0.0131
0.4766	-0.0178
0.4785	-0.0245
0.4805	-0.0333
0.4824	-0.043
0.4844	-0.0487
0.4863	-0.0491
0.4883	-0.0431
0.4902	-0.0326
0.4922	-0.0211
0.4941	-0.0134
0.4961	-0.0118
0.498	-0.0139
0.5	-0.0158
0.502	-0.0152
0.5039	-0.0148
0.5059	-0.0146
0.5078	-0.0142
0.5098	-0.0119
0.5117	-0.00843
0.5137	-0.0024
0.5156	0.00512
0.5176	0.0148
0.5195	0.0248
0.5215	0.0326
0.5234	0.0359
0.5254	0.0351
0.5273	0.0297
0.5293	0.0198
0.5313	0.00371
0.5332	-0.0122
0.5352	-0.0197
0.5371	-0.0173
0.5391	-0.0095
0.541	-0.00403
0.543	-0.00247
0.5449	-0.00544
0.5469	-0.011
0.5488	-0.0174
0.5508	-0.0253
0.5527	-0.034
0.5547	-0.0389
0.5566	-0.0371
0.5586	-0.0309
0.5605	-0.0247
0.5625	-0.0224
0.5645	-0.0254
0.5664	-0.028
0.5684	-0.0287
0.5703	-0.0268
0.5723	-0.0251
0.5742	-0.0205
0.5762	-0.0139
0.5781	-0.00561
0.5801	0.001
0.582	0.00346
0.584	0.00293
0.5859	0.00141
0.5879	0.000111
0.5898	0.000964
0.5918	0.00717
0.5938	0.0177
0.5957	0.0285
0.5977	0.0353
0.5996	0.0353
0.6016	0.0264
0.6035	0.0113
0.6055	-0.00533
0.6074	-0.0188
0.6094	-0.0289
0.6113	-0.0338
0.6133	-0.0287
0.6152	-0.0162
0.6172	-0.00391
0.6191	0.00178
0.6211	-0.00317
0.623	-0.015
0.625	-0.0291
0.627	-0.0439
0.6289	-0.056
0.6309	-0.0593
0.6328	-0.0513
0.6348	-0.0302
0.6367	-0.00654
0.6387	0.00639
0.6406	0.00516
0.6426	-0.00482
0.6445	-0.0145
0.6465	-0.0238
0.6484	-0.0279
0.6504	-0.0257
0.6523	-0.011
0.6543	0.0123
0.6563	0.0373
0.6582	0.051
0.6602	0.0481
0.6621	0.0315
0.6641	0.0137
0.666	0.00132
0.668	-0.00781
0.6699	-0.0126
0.6719	-0.0106
0.6738	-0.00105
0.6758	0.00761
0.6777	0.00681
0.6797	-0.00828
0.6816	-0.0293
0.6836	-0.0414
0.6855	-0.0404
0.6875	-0.0309
0.6895	-0.0232
0.6914	-0.0198
0.6934	-0.0173
0.6953	-0.0178
0.6973	-0.0231
0.6992	-0.0323
0.7012	-0.0408
0.7031	-0.0383
0.7051	-0.0205
0.707	0.00154
0.709	0.0167
0.7109	0.0176
0.7129	0.00937
0.7148	-0.00314
0.7168	-0.0118
0.7188	-0.0114
0.7207	0.000694
0.7227	0.0219
0.7246	0.0441
0.7266	0.0575
0.7285	0.0473
0.7305	0.0147
0.7324	-0.0241
0.7344	-0.0529
0.7363	-0.0592
0.7383	-0.042
0.7402	-0.0157
0.7422	0.00982
0.7441	0.0217
0.7461	0.0138
0.748	-0.0121
0.75	-0.0477
0.752	-0.0748
0.7539	-0.0799
0.7559	-0.0593
0.7578	-0.0206
0.7598	0.0149
0.7617	0.031
0.7637	0.0239
0.7656	-0.000194
0.7676	-0.0271
0.7695	-0.0417
0.7715	-0.0358
0.7734	-0.0103
0.7754	0.0265
0.7773	0.0588
0.7793	0.0704
0.7813	0.054
0.7832	0.0204
0.7852	-0.0136
0.7871	-0.0346
0.7891	-0.0322
0.791	-0.0155
0.793	0.00261
0.7949	0.0112
0.7969	0.00466
0.7988	-0.0117
0.8008	-0.032
0.8027	-0.0441
0.8047	-0.0452
0.8066	-0.0365
0.8086	-0.0245
0.8105	-0.0189
0.8125	-0.0187
0.8145	-0.0214
0.8164	-0.0245
0.8184	-0.0228
0.8203	-0.015
0.8223	-0.00396
0.8242	0.0068
0.8262	0.0118
0.8281	0.00795
0.8301	0.00157
0.832	0.0022
0.834	0.014
0.8359	0.0309
0.8379	0.0448
0.8398	0.0425
0.8418	0.0219
0.8438	-0.00749
0.8457	-0.0356
0.8477	-0.0505
0.8496	-0.0452
0.8516	-0.0243
0.8535	0.000641
0.8555	0.0148
0.8574	0.00883
0.8594	-0.0156
0.8613	-0.0453
0.8633	-0.0643
0.8652	-0.0634
0.8672	-0.041
0.8691	-0.0119
0.8711	0.0139
0.873	0.0256
0.875	0.02
0.877	0.00457
0.8789	-0.011
0.8809	-0.0186
0.8828	-0.0133
0.8848	0.00622
0.8867	0.03
0.8887	0.0473
0.8906	0.0513
0.8926	0.0357
0.8945	0.00777
0.8965	-0.0214
0.8984	-0.0452
0.9004	-0.0532
0.9023	-0.0439
0.9043	-0.0206
0.9063	0.00426
0.9082	0.0165
0.9102	0.00845
0.9121	-0.0184
0.9141	-0.0499
0.916	-0.0726
0.918	-0.071
0.9199	-0.0452
0.9219	-0.0072
0.9238	0.0289
0.9258	0.044
0.9277	0.0349
0.9297	0.00713
0.9316	-0.0233
0.9336	-0.0347
0.9355	-0.0172
0.9375	0.0194
0.9395	0.0551
0.9414	0.0701
0.9434	0.0539
0.9453	0.0143
0.9473	-0.0295
0.9492	-0.0624
0.9512	-0.0669
0.9531	-0.0463
0.9551	-0.0117
0.957	0.0143
0.959	0.0196
0.9609	0.00306
0.9629	-0.0231
0.9648	-0.0502
0.9668	-0.0617
0.9688	-0.0546
0.9707	-0.0317
0.9727	-0.000233
0.9746	0.0269
0.9766	0.0393
0.9785	0.0323
0.9805	0.011
0.9824	-0.0125
0.9844	-0.0206
0.9863	-0.0089
0.9883	0.0177
0.9902	0.0434
0.9922	0.0498
0.9941	0.0354
0.9961	-0.00109
0.998	-0.0432
1	-0.0706
1.002	-0.0678
1.0039	-0.0389
1.0059	-0.00202
1.0078	0.0192
1.0098	0.0163
1.0117	-0.0103
1.0137	-0.0432
1.0156	-0.0633
1.0176	-0.0611
1.0195	-0.0353
1.0215	0.00266
1.0234	0.0344
1.0254	0.0477
1.0273	0.0378
1.0293	0.0161
1.0313	-0.00162
1.0332	-0.00726
1.0352	0.000229
1.0371	0.0145
1.0391	0.0259
1.041	0.0297
1.043	0.0191
1.0449	-0.0076
1.0469	-0.0393
1.0488	-0.0593
1.0508	-0.0566
1.0527	-0.0347
1.0547	-0.008
1.0566	0.00897
1.0586	0.00622
1.0605	-0.0122
1.0625	-0.0347
1.0645	-0.0498
1.0664	-0.0463
1.0684	-0.0238
1.0703	0.0109
1.0723	0.041
1.0742	0.0509
1.0762	0.0362
1.0781	0.0116
1.0801	-0.00606
1.082	-0.00564
1.084	0.00435
1.0859	0.0139
1.0879	0.0133
1.0898	0.00132
1.0918	-0.0145
1.0938	-0.0286
1.0957	-0.0381
1.0977	-0.0426
1.0996	-0.0388
1.1016	-0.0252
1.1035	-0.0101
1.1055	-0.000596
1.1074	-0.00282
1.1094	-0.0141
1.1113	-0.0225
1.1133	-0.0232
1.1152	-0.0108
1.1172	0.00895
1.1191	0.0292
1.1211	0.0428
1.123	0.0427
1.125	0.0284
1.127	0.00924
1.1289	-0.00932
1.1309	-0.0155
1.1328	-0.015
1.1348	-0.0154
1.1367	-0.0187
1.1387	-0.0215
1.1406	-0.0198
1.1426	-0.0183
1.1445	-0.0193
1.1465	-0.0259
1.1484	-0.0362
1.1504	-0.038
1.1523	-0.0305
1.1543	-0.0133
1.1563	0.00602
1.1582	0.0194
1.1602	0.024
1.1621	0.0186
1.1641	0.0111
1.166	0.00821
1.168	0.0121
1.1699	0.0202
1.1719	0.0228
1.1738	0.0176
1.1758	0.00249
1.1777	-0.0177
1.1797	-0.0341
1.1816	-0.0411
1.1836	-0.0389
1.1855	-0.0315
1.1875	-0.0187
1.1895	-0.00631
1.1914	0.000266
1.1934	-0.00337
1.1953	-0.0177
1.1973	-0.0302
1.1992	-0.0304
1.2012	-0.0115
1.2031	0.0191
1.2051	0.0403
1.207	0.0457
1.209	0.0328
1.2109	0.0152
1.2129	0.000123
1.2148	-0.00803
1.2168	-0.00961
1.2188	-0.0141
1.2207	-0.0202
1.2227	-0.024
1.2246	-0.0222
1.2266	-0.0203
1.2285	-0.0217
1.2305	-0.0243
1.2324	-0.0297
1.2344	-0.0281
1.2363	-0.0218
1.2383	-0.0104
1.2402	0.00148
1.2422	0.00977
1.2441	0.0149
1.2461	0.0186
1.248	0.0242
1.25	0.0281
1.252	0.0261
1.2539	0.0163
1.2559	0.00293
1.2578	-0.00548
1.2598	-0.0139
1.2617	-0.0214
1.2637	-0.0274
1.2656	-0.0311
1.2676	-0.0295
1.2695	-0.0224
1.2715	-0.0142
1.2734	-0.0115
1.2754	-0.0156
1.2773	-0.0234
1.2793	-0.0232
1.2813	-0.0134
1.2832	0.0058
1.2852	0.023
1.2871	0.0298
1.2891	0.0287
1.291	0.0226
1.293	0.0162
1.2949	0.00874
1.2969	0.00298
1.2988	-0.00705
1.3008	-0.0216
1.3027	-0.0317
1.3047	-0.032
1.3066	-0.0254
1.3086	-0.0192
1.3105	-0.0163
1.3125	-0.019
1.3145	-0.0191
1.3164	-0.0168
1.3184	-0.0114
1.3203	-0.00606
1.3223	0.000414
1.3242	0.0116
1.3262	0.0265
1.3281	0.039
1.3301	0.0358
1.332	0.019
1.334	-0.00206
1.3359	-0.00928
1.3379	-0.00898
1.3398	-0.0122
1.3418	-0.0239
1.3438	-0.0353
1.3457	-0.0348
1.3477	-0.0233
1.3496	-0.01
1.3516	-0.0102
1.3535	-0.0196
1.3555	-0.0294
1.3574	-0.023
1.3594	-0.00583
1.3613	0.0146
1.3633	0.024
1.3652	0.0261
1.3672	0.0274
1.3691	0.028
1.3711	0.024
1.373	0.0089
1.375	-0.00771
1.377	-0.0219
1.3789	-0.028
1.3809	-0.0265
1.3828	-0.025
1.3848	-0.0269
1.3867	-0.0242
1.3887	-0.0168
1.3906	-0.00576
1.3926	-0.00305
1.3945	-0.00918
1.3965	-0.0169
1.3984	-0.0116
1.4004	0.00766
1.4023	0.0297
1.4043	0.0412
1.4063	0.0344
1.4082	0.018
1.4102	0.000998
1.4121	-0.00528
1.4141	-0.0128
1.416	-0.0267
1.418	-0.0406
1.4199	-0.0406
1.4219	-0.0253
1.4238	-0.00543
1.4258	-0.00142
1.4277	-0.0127
1.4297	-0.0275
1.4316	-0.027
1.4336	-0.0105
1.4355	0.00963
1.4375	0.0189
1.4395	0.0239
1.4414	0.0319
1.4434	0.0393
1.4453	0.033
1.4473	0.00831
1.4492	-0.0186
1.4512	-0.0358
1.4531	-0.0343
1.4551	-0.0236
1.457	-0.0197
1.459	-0.0224
1.4609	-0.02
1.4629	-0.011
1.4648	-0.00314
1.4668	-0.00911
1.4688	-0.0223
1.4707	-0.0235
1.4727	-0.000948
1.4746	0.0307
1.4766	0.0475
1.4785	0.0369
1.4805	0.0155
1.4824	0.000179
1.4844	0.000958
1.4863	-0.00409
1.4883	-0.0256
1.4902	-0.0475
1.4922	-0.0488
1.4941	-0.0254
1.4961	0.00109
1.498	0.00494
1.5	-0.0109
1.502	-0.025
1.5039	-0.019
1.5059	-0.000645
1.5078	0.0121
1.5098	0.0138
1.5117	0.0204
1.5137	0.035
1.5156	0.0433
1.5176	0.0276
1.5195	-0.00445
1.5215	-0.0326
1.5234	-0.042
1.5254	-0.034
1.5273	-0.0275
1.5293	-0.0288
1.5313	-0.0251
1.5332	-0.0102
1.5352	0.00488
1.5371	0.00246
1.5391	-0.0145
1.541	-0.0243
1.543	-0.0079
1.5449	0.0246
1.5469	0.0456
1.5488	0.0394
1.5508	0.019
1.5527	0.00409
1.5547	0.00158
1.5566	-0.0104
1.5586	-0.0366
1.5605	-0.0558
1.5625	-0.0508
1.5645	-0.0203
1.5664	0.00825
1.5684	0.0123
1.5703	-0.00248
1.5723	-0.0153
1.5742	-0.0107
1.5762	0.00301
1.5781	0.0102
1.5801	0.0148
1.582	0.0224
1.584	0.0321
1.5859	0.0309
1.5879	0.0145
1.5898	-0.015
1.5918	-0.0425
1.5938	-0.0523
1.5957	-0.0459
1.5977	-0.0301
1.5996	-0.0137
1.6016	-0.00215
1.6035	0.00213
1.6055	0.00198
1.6074	-0.000103
1.6094	0.000209
1.6113	0.00463
1.6133	0.0138
1.6152	0.0261
1.6172	0.0323
1.6191	0.0256
1.6211	0.0134
1.623	-0.00773
1.625	-0.0306
1.627	-0.0452
1.6289	-0.0492
1.6309	-0.0375
1.6328	-0.017
1.6348	0.003
1.6367	0.0104
1.6387	0.00643
1.6406	-0.00108
1.6426	-0.00233
1.6445	0.00389
1.6465	0.0158
1.6484	0.0237
1.6504	0.0227
1.6523	0.0163
1.6543	0.0102
1.6563	-0.00557
1.6582	-0.0297
1.6602	-0.0537
1.6621	-0.0591
1.6641	-0.0375
1.666	-0.00477
1.668	0.0141
1.6699	0.0131
1.6719	0.00343
1.6738	0.00337
1.6758	0.0103
1.6777	0.0149
1.6797	0.0158
1.6816	0.0142
1.6836	0.0158
1.6855	0.019
1.6875	0.00947
1.6895	-0.0182
1.6914	-0.0474
1.6934	-0.0597
1.6953	-0.0455
1.6973	-0.0174
1.6992	0.00257
1.7012	0.00783
1.7031	0.00591
1.7051	0.00909
1.707	0.015
1.709	0.0155
1.7109	0.00975
1.7129	0.00571
1.7148	0.0101
1.7168	0.0198
1.7188	0.0173
1.7207	-0.00977
1.7227	-0.0432
1.7246	-0.0605
1.7266	-0.0498
1.7285	-0.0221
1.7305	-0.000144
1.7324	0.00993
1.7344	0.0143
1.7363	0.0231
1.7383	0.0248
1.7402	0.0172
1.7422	0.00264
1.7441	-0.00506
1.7461	-0.000302
1.748	0.0144
1.75	0.0162
1.752	-0.00544
1.7539	-0.0357
1.7559	-0.055
1.7578	-0.0474
1.7598	-0.0273
1.7617	-0.0112
1.7637	-0.00332
1.7656	0.0104
1.7676	0.0313
1.7695	0.0432
1.7715	0.0312
1.7734	0.00404
1.7754	-0.0149
1.7773	-0.0113
1.7793	0.00701
1.7813	0.00729
1.7832	-0.0116
1.7852	-0.0352
1.7871	-0.0403
1.7891	-0.0272
1.791	-0.0145
1.793	-0.0127
1.7949	-0.0111
1.7969	0.00683
1.7988	0.0331
1.8008	0.0475
1.8027	0.0334
1.8047	0.00355
1.8066	-0.0186
1.8086	-0.0135
1.8105	-0.00383
1.8125	-0.011
1.8145	-0.0338
1.8164	-0.0439
1.8184	-0.0269
1.8203	-0.00204
1.8223	0.00258
1.8242	-0.0104
1.8262	-0.0111
1.8281	0.013
1.8301	0.0405
1.832	0.0454
1.834	0.0223
1.8359	-0.00491
1.8379	-0.0102
1.8398	-0.00631
1.8418	-0.0154
1.8438	-0.0385
1.8457	-0.0516
1.8477	-0.0356
1.8496	-0.00275
1.8516	0.0139
1.8535	0.006
1.8555	-0.00557
1.8574	0.0027
1.8594	0.0252
1.8613	0.0354
1.8633	0.0196
1.8652	-0.00455
1.8672	-0.00966
1.8691	-0.00136
1.8711	-0.00714
1.873	-0.0336
1.875	-0.0578
1.877	-0.0457
1.8789	-0.00967
1.8809	0.0185
1.8828	0.0192
1.8848	0.0123
1.8867	0.0142
1.8887	0.0284
1.8906	0.0319
1.8926	0.00966
1.8945	-0.0163
1.8965	-0.02
1.8984	-0.00983
1.9004	-0.00768
1.9023	-0.0261
1.9043	-0.0444
1.9063	-0.0384
1.9082	-0.0146
1.9102	0.00475
1.9121	0.0106
1.9141	0.0134
1.916	0.0246
1.918	0.036
1.9199	0.0332
1.9219	0.00722
1.9238	-0.0144
1.9258	-0.0224
1.9277	-0.023
1.9297	-0.0252
1.9316	-0.0321
1.9336	-0.029
1.9355	-0.0152
1.9375	0.00157
1.9395	0.0108
1.9414	0.0148
1.9434	0.0172
1.9453	0.0211
1.9473	0.0233
1.9492	0.0142
1.9512	0.000192
1.9531	-0.00977
1.9551	-0.0209
1.957	-0.0308
1.959	-0.0387
1.9609	-0.0353
1.9629	-0.0206
1.9648	-0.00577
1.9668	0.00588
1.9688	0.0177
1.9707	0.0298
1.9727	0.0336
1.9746	0.0263
1.9766	0.00886
1.9785	-0.00588
1.9805	-0.0099
1.9824	-0.0172
1.9844	-0.0283
1.9863	-0.0384
1.9883	-0.0336
1.9902	-0.0161
1.9922	-0.00204
1.9941	0.00231
1.9961	0.00811
1.998	0.021
2	0.0333
2.002	0.0303
2.0039	0.0101
2.0059	-0.00888
2.0078	-0.0131
2.0098	-0.0172
2.0117	-0.028
2.0137	-0.0415
2.0156	-0.0374
2.0176	-0.0158
2.0195	0.00511
2.0215	0.0137
2.0234	0.0187
2.0254	0.026
2.0273	0.0311
2.0293	0.0272
2.0313	0.00696
2.0332	-0.0113
2.0352	-0.0191
2.0371	-0.0244
2.0391	-0.0317
2.041	-0.0354
2.043	-0.0281
2.0449	-0.0132
2.0469	-0.00177
2.0488	0.00821
2.0508	0.0205
2.0527	0.0312
2.0547	0.0316
2.0566	0.0189
2.0586	-0.000587
2.0605	-0.00871
2.0625	-0.016
2.0645	-0.0276
2.0664	-0.0404
2.0684	-0.038
2.0703	-0.0183
2.0723	0.00145
2.0742	0.00988
2.0762	0.0156
2.0781	0.0251
2.0801	0.0313
2.082	0.0252
2.084	0.00405
2.0859	-0.012
2.0879	-0.0167
2.0898	-0.022
2.0918	-0.0317
2.0938	-0.0372
2.0957	-0.0273
2.0977	-0.0115
2.0996	7.34e-05
2.1016	0.00975
2.1035	0.0249
2.1055	0.036
2.1074	0.0344
2.1094	0.015
2.1113	-0.00461
2.1133	-0.013
2.1152	-0.022
2.1172	-0.035
2.1191	-0.0431
2.1211	-0.0309
2.123	-0.00822
2.125	0.00614
2.127	0.0104
2.1289	0.0178
2.1309	0.0286
2.1328	0.0303
2.1348	0.0148
2.1367	-0.00664
2.1387	-0.0148
2.1406	-0.0185
2.1426	-0.0275
2.1445	-0.0384
2.1465	-0.0351
2.1484	-0.0168
2.1504	-0.000122
2.1523	0.0116
2.1543	0.0259
2.1563	0.0376
2.1582	0.0375
2.1602	0.0184
2.1621	-0.00529
2.1641	-0.0179
2.166	-0.0256
2.168	-0.0361
2.1699	-0.0418
2.1719	-0.0289
2.1738	-0.0071
2.1758	0.00468
2.1777	0.00904
2.1797	0.0169
2.1816	0.0301
2.1836	0.0322
2.1855	0.0143
2.1875	-0.00626
2.1895	-0.0131
2.1914	-0.0186
2.1934	-0.0287
2.1953	-0.0403
2.1973	-0.033
2.1992	-0.0127
2.2012	0.00476
2.2031	0.0182
2.2051	0.031
2.207	0.0373
2.209	0.0297
2.2109	0.00618
2.2129	-0.0124
2.2148	-0.021
2.2168	-0.0297
2.2188	-0.0385
2.2207	-0.0355
2.2227	-0.0161
2.2246	0.00056
2.2266	0.00701
2.2285	0.0143
2.2305	0.0275
2.2324	0.0354
2.2344	0.0256
2.2363	0.00132
2.2383	-0.0117
2.2402	-0.0188
2.2422	-0.0271
2.2441	-0.0394
2.2461	-0.0357
2.248	-0.0169
2.25	0.000926
2.252	0.0149
2.2539	0.0294
2.2559	0.0375
2.2578	0.03
2.2598	0.00633
2.2617	-0.0123
2.2637	-0.0199
2.2656	-0.0285
2.2676	-0.0386
2.2695	-0.0368
2.2715	-0.0167
2.2734	0.00158
2.2754	0.0111
2.2773	0.0207
2.2793	0.0327
2.2813	0.0367
2.2832	0.02
2.2852	-0.00392
2.2871	-0.0166
2.2891	-0.0245
2.291	-0.0342
2.293	-0.0393
2.2949	-0.0256
2.2969	-0.00643
2.2988	0.0043
2.3008	0.0155
2.3027	0.0303
2.3047	0.0366
2.3066	0.0234
2.3086	-0.00238
2.3105	-0.0158
2.3125	-0.0213
2.3145	-0.0291
2.3164	-0.0373
2.3184	-0.0295
2.3203	-0.00832
2.3223	0.0063
2.3242	0.0177
2.3262	0.0304
2.3281	0.0365
2.3301	0.025
2.332	-0.00034
2.334	-0.0153
2.3359	-0.022
2.3379	-0.0316
2.3398	-0.0391
2.3418	-0.0289
2.3438	-0.00795
2.3457	0.0046
2.3477	0.013
2.3496	0.026
2.3516	0.0359
2.3535	0.0293
2.3555	0.00388
2.3574	-0.0136
2.3594	-0.0213
2.3613	-0.0291
2.3633	-0.0376
2.3652	-0.0297
2.3672	-0.00936
2.3691	0.00472
2.3711	0.0164
2.373	0.0312
2.375	0.0381
2.377	0.0234
2.3789	-0.00521
2.3809	-0.0205
2.3828	-0.0251
2.3848	-0.0324
2.3867	-0.0373
2.3887	-0.0254
2.3906	-0.00408
2.3926	0.00916
2.3945	0.0207
2.3965	0.0328
2.3984	0.0367
2.4004	0.0213
2.4023	-0.00485
2.4043	-0.0184
2.4063	-0.0253
2.4082	-0.0348
2.4102	-0.0377
2.4121	-0.0215
2.4141	-0.000517
2.416	0.00999
2.418	0.0217
2.4199	0.0342
2.4219	0.0339
2.4238	0.0118
2.4258	-0.0126
2.4277	-0.0224
2.4297	-0.0279
2.4316	-0.0347
2.4336	-0.0326
2.4355	-0.0121
2.4375	0.00527
2.4395	0.0162
2.4414	0.0297
2.4434	0.0385
2.4453	0.0298
2.4473	0.000295
2.4492	-0.0204
2.4512	-0.026
2.4531	-0.0326
2.4551	-0.038
2.457	-0.026
2.459	-0.00381
2.4609	0.0088
2.4629	0.02
2.4648	0.0317
2.4668	0.0363
2.4688	0.019
2.4707	-0.00854
2.4727	-0.0214
2.4746	-0.027
2.4766	-0.0345
2.4785	-0.0351
2.4805	-0.0165
2.4824	0.00305
2.4844	0.0153
2.4863	0.0291
2.4883	0.04
2.4902	0.0323
2.4922	0.00178
2.4941	-0.022
2.4961	-0.0292
2.498	-0.0355
2.5	-0.0389
2.502	-0.0266
2.5039	-0.00299
2.5059	0.0123
2.5078	0.0252
2.5098	0.038
2.5117	0.0405
2.5137	0.0186
2.5156	-0.0124
2.5176	-0.0268
2.5195	-0.0322
2.5215	-0.0388
2.5234	-0.0349
2.5254	-0.0122
2.5273	0.00759
2.5293	0.019
2.5313	0.033
2.5332	0.0402
2.5352	0.0261
2.5371	-0.00573
2.5391	-0.025
2.541	-0.0307
2.543	-0.0363
2.5449	-0.0364
2.5469	-0.0198
2.5488	0.00358
2.5508	0.0165
2.5527	0.0312
2.5547	0.0426
2.5566	0.0368
2.5586	0.00575
2.5605	-0.0221
2.5625	-0.0305
2.5645	-0.037
2.5664	-0.0405
2.5684	-0.027
2.5703	-0.00261
2.5723	0.012
2.5742	0.0259
2.5762	0.0393
2.5781	0.0398
2.5801	0.015
2.582	-0.0161
2.584	-0.0285
2.5859	-0.0344
2.5879	-0.0389
2.5898	-0.0312
2.5918	-0.00672
2.5938	0.0112
2.5957	0.0238
2.5977	0.0391
2.5996	0.0438
2.6016	0.0199
2.6035	-0.0149
2.6055	-0.0306
2.6074	-0.0367
2.6094	-0.0419
2.6113	-0.034
2.6133	-0.01
2.6152	0.00826
2.6172	0.0234
2.6191	0.0392
2.6211	0.0464
2.623	0.0264
2.625	-0.0098
2.627	-0.0292
2.6289	-0.036
2.6309	-0.041
2.6328	-0.0362
2.6348	-0.0116
2.6367	0.00838
2.6387	0.0217
2.6406	0.0385
2.6426	0.0451
2.6445	0.0237
2.6465	-0.0126
2.6484	-0.0317
2.6504	-0.0367
2.6523	-0.0401
2.6543	-0.0339
2.6563	-0.0106
2.6582	0.00994
2.6602	0.0245
2.6621	0.0412
2.6641	0.0475
2.666	0.0265
2.668	-0.0129
2.6699	-0.0329
2.6719	-0.0383
2.6738	-0.0418
2.6758	-0.0341
2.6777	-0.00892
2.6797	0.00896
2.6816	0.0233
2.6836	0.0405
2.6855	0.0452
2.6875	0.0221
2.6895	-0.0152
2.6914	-0.0325
2.6934	-0.0372
2.6953	-0.0393
2.6973	-0.0308
2.6992	-0.0058
2.7012	0.0121
2.7031	0.0264
2.7051	0.0432
2.707	0.0458
2.709	0.0165
2.7109	-0.0214
2.7129	-0.0363
2.7148	-0.0419
2.7168	-0.0428
2.7188	-0.0277
2.7207	-0.00243
2.7227	0.0143
2.7246	0.0326
2.7266	0.0487
2.7285	0.0466
2.7305	0.0108
2.7324	-0.0255
2.7344	-0.0393
2.7363	-0.0432
2.7383	-0.042
2.7402	-0.0214
2.7422	0.0047
2.7441	0.019
2.7461	0.0368
2.748	0.0504
2.75	0.0363
2.752	-0.00629
2.7539	-0.0361
2.7559	-0.0443
2.7578	-0.0448
2.7598	-0.0351
2.7617	-0.00999
2.7637	0.0125
2.7656	0.0271
2.7676	0.0455
2.7695	0.0524
2.7715	0.0264
2.7734	-0.0185
2.7754	-0.0418
2.7773	-0.0463
2.7793	-0.0442
2.7813	-0.0272
2.7832	0.00073
2.7852	0.0154
2.7871	0.0306
2.7891	0.0488
2.791	0.0458
2.793	0.00714
2.7949	-0.0312
2.7969	-0.0451
2.7988	-0.0455
2.8008	-0.0374
2.8027	-0.0142
2.8047	0.00982
2.8066	0.0222
2.8086	0.0413
2.8105	0.0544
2.8125	0.0343
2.8145	-0.0142
2.8164	-0.0428
2.8184	-0.0507
2.8203	-0.0486
2.8223	-0.0291
2.8242	-0.000626
2.8262	0.0147
2.8281	0.0317
2.8301	0.0522
2.832	0.0533
2.834	0.013
2.8359	-0.032
2.8379	-0.0511
2.8398	-0.0515
2.8418	-0.04
2.8438	-0.0109
2.8457	0.0121
2.8477	0.0229
2.8496	0.0435
2.8516	0.0573
2.8535	0.0314
2.8555	-0.0201
2.8574	-0.0507
2.8594	-0.058
2.8613	-0.048
2.8633	-0.0208
2.8652	0.00849
2.8672	0.0213
2.8691	0.0373
2.8711	0.0567
2.873	0.0496
2.875	0.00133
2.877	-0.043
2.8789	-0.0595
2.8809	-0.0553
2.8828	-0.0318
2.8848	0.00421
2.8867	0.0184
2.8887	0.0273
2.8906	0.0484
2.8926	0.054
2.8945	0.0172
2.8965	-0.032
2.8984	-0.0586
2.9004	-0.0606
2.9023	-0.0392
2.9043	-0.00164
2.9063	0.0203
2.9082	0.0263
2.9102	0.0434
2.9121	0.0578
2.9141	0.0328
2.916	-0.0203
2.918	-0.0562
2.9199	-0.0692
2.9219	-0.0529
2.9238	-0.0105
2.9258	0.0197
2.9277	0.0261
2.9297	0.039
2.9316	0.0571
2.9336	0.0434
2.9355	-0.00714
2.9375	-0.0506
2.9395	-0.0713
2.9414	-0.0605
2.9434	-0.0184
2.9453	0.023
2.9473	0.0305
2.9492	0.037
2.9512	0.0531
2.9531	0.0434
2.9551	-0.0031
2.957	-0.0488
2.959	-0.0747
2.9609	-0.069
2.9629	-0.0228
2.9648	0.0249
2.9668	0.0373
2.9688	0.0409
2.9707	0.0513
2.9727	0.0449
2.9746	0.00209
2.9766	-0.0439
2.9785	-0.0735
2.9805	-0.0741
2.9824	-0.028
2.9844	0.0264
2.9863	0.0415
2.9883	0.0411
2.9902	0.0469
2.9922	0.0371
2.9941	-0.000213
2.9961	-0.0417
2.998	-0.0728
3	-0.0748
3.002	-0.0289
3.0039	0.0284
3.0059	0.0485
3.0078	0.0484
3.0098	0.048
3.0117	0.0333
3.0137	-0.0053
3.0156	-0.042
3.0176	-0.0728
3.0195	-0.0789
3.0215	-0.0302
3.0234	0.0277
3.0254	0.0512
3.0273	0.0539
3.0293	0.0503
3.0313	0.0278
3.0332	-0.0106
3.0352	-0.0439
3.0371	-0.0729
3.0391	-0.0748
3.041	-0.0251
3.043	0.0337
3.0449	0.0564
3.0469	0.061
3.0488	0.0499
3.0508	0.0147
3.0527	-0.0246
3.0547	-0.053
3.0566	-0.0788
3.0586	-0.0692
3.0605	-0.014
3.0625	0.0394
3.0645	0.0651
3.0664	0.0704
3.0684	0.05
3.0703	0.00337
3.0723	-0.0375
3.0742	-0.0627
3.0762	-0.0798
3.0781	-0.0573
3.0801	0.00371
3.082	0.0478
3.084	0.0692
3.0859	0.0703
3.0879	0.036
3.0898	-0.0172
3.0918	-0.0526
3.0938	-0.0736
3.0957	-0.0748
3.0977	-0.0345
3.0996	0.0238
3.1016	0.0593
3.1035	0.0773
3.1055	0.0681
3.1074	0.02
3.1094	-0.0361
3.1113	-0.0657
3.1133	-0.083
3.1152	-0.0663
3.1172	-0.00984
3.1191	0.0383
3.1211	0.0663
3.123	0.0784
3.125	0.0549
3.127	-0.00168
3.1289	-0.0507
3.1309	-0.0774
3.1328	-0.082
3.1348	-0.0424
3.1367	0.0187
3.1387	0.0553
3.1406	0.0748
3.1426	0.0729
3.1445	0.0277
3.1465	-0.0312
3.1484	-0.0676
3.1504	-0.0895
3.1523	-0.0714
3.1543	-0.011
3.1563	0.0422
3.1582	0.0712
3.1602	0.0818
3.1621	0.057
3.1641	-0.0032
3.166	-0.0536
3.168	-0.0829
3.1699	-0.0877
3.1719	-0.0413
3.1738	0.0242
3.1758	0.0623
3.1777	0.0818
3.1797	0.0709
3.1816	0.0174
3.1836	-0.0398
3.1855	-0.0749
3.1875	-0.0918
3.1895	-0.0644
3.1914	0.00186
3.1934	0.0544
3.1953	0.0829
3.1973	0.0859
3.1992	0.0435
3.2012	-0.0248
3.2031	-0.0684
3.2051	-0.0925
3.207	-0.0825
3.209	-0.02
3.2109	0.0387
3.2129	0.0757
3.2148	0.0905
3.2168	0.0617
3.2188	-0.0049
3.2207	-0.0606
3.2227	-0.0904
3.2246	-0.0905
3.2266	-0.0379
3.2285	0.0316
3.2305	0.0733
3.2324	0.0924
3.2344	0.0745
3.2363	0.00745
3.2383	-0.0555
3.2402	-0.0906
3.2422	-0.1
3.2441	-0.0529
3.2461	0.0197
3.248	0.07
3.25	0.096
3.252	0.0855
3.2539	0.0243
3.2559	-0.0488
3.2578	-0.0911
3.2598	-0.104
3.2617	-0.0655
3.2637	0.0141
3.2656	0.0698
3.2676	0.0976
3.2695	0.091
3.2715	0.0287
3.2734	-0.0471
3.2754	-0.0941
3.2773	-0.11
3.2793	-0.0734
3.2813	0.00839
3.2832	0.0733
3.2852	0.106
3.2871	0.102
3.2891	0.0405
3.291	-0.047
3.293	-0.0997
3.2949	-0.119
3.2969	-0.0833
3.2988	0.00493
3.3008	0.0739
3.3027	0.111
3.3047	0.108
3.3066	0.044
3.3086	-0.0458
3.3105	-0.106
3.3125	-0.127
3.3145	-0.0884
3.3164	0.00563
3.3184	0.0845
3.3203	0.123
3.3223	0.118
3.3242	0.0439
3.3262	-0.0557
3.3281	-0.118
3.3301	-0.141
3.332	-0.0933
3.334	0.00802
3.3359	0.0917
3.3379	0.136
3.3398	0.127
3.3418	0.0462
3.3438	-0.0619
3.3457	-0.131
3.3477	-0.151
3.3496	-0.0945
3.3516	0.0197
3.3535	0.107
3.3555	0.149
3.3574	0.131
3.3594	0.0341
3.3613	-0.0779
3.3633	-0.149
3.3652	-0.164
3.3672	-0.0906
3.3691	0.0317
3.3711	0.126
3.373	0.168
3.375	0.138
3.377	0.0271
3.3789	-0.0972
3.3809	-0.17
3.3828	-0.177
3.3848	-0.0835
3.3867	0.0493
3.3887	0.144
3.3906	0.185
3.3926	0.136
3.3945	0.00929
3.3965	-0.118
3.3984	-0.192
3.4004	-0.184
3.4023	-0.0685
3.4043	0.0761
3.4063	0.174
3.4082	0.203
3.4102	0.13
3.4121	-0.0205
3.4141	-0.149
3.416	-0.221
3.418	-0.186
3.4199	-0.0452
3.4219	0.104
3.4238	0.204
3.4258	0.217
3.4277	0.114
3.4297	-0.0505
3.4316	-0.185
3.4336	-0.244
3.4355	-0.176
3.4375	-0.00867
3.4395	0.145
3.4414	0.236
3.4434	0.218
3.4453	0.0775
3.4473	-0.0945
3.4492	-0.227
3.4512	-0.261
3.4531	-0.15
3.4551	0.0331
3.457	0.192
3.459	0.269
3.4609	0.21
3.4629	0.0374
3.4648	-0.146
3.4668	-0.271
3.4688	-0.265
3.4707	-0.108
3.4727	0.086
3.4746	0.242
3.4766	0.285
3.4785	0.177
3.4805	-0.0171
3.4824	-0.203
3.4844	-0.306
3.4863	-0.245
3.4883	-0.0545
3.4902	0.152
3.4922	0.294
3.4941	0.287
3.4961	0.126
3.498	-0.0856
3.5	-0.269
3.502	-0.326
3.5039	-0.203
3.5059	0.0118
3.5078	0.224
3.5098	0.331
3.5117	0.261
3.5137	0.062
3.5156	-0.164
3.5176	-0.326
3.5195	-0.316
3.5215	-0.137
3.5234	0.096
3.5254	0.295
3.5273	0.339
3.5293	0.202
3.5313	-0.0215
3.5332	-0.25
3.5352	-0.36
3.5371	-0.276
3.5391	-0.0588
3.541	0.192
3.543	0.355
3.5449	0.321
3.5469	0.128
3.5488	-0.121
3.5508	-0.329
3.5527	-0.359
3.5547	-0.208
3.5566	0.0393
3.5586	0.283
3.5605	0.372
3.5625	0.264
3.5645	0.0338
3.5664	-0.227
3.5684	-0.377
3.5703	-0.323
3.5723	-0.116
3.5742	0.158
3.5762	0.356
3.5781	0.353
3.5801	0.18
3.582	-0.0836
3.584	-0.321
3.5859	-0.38
3.5879	-0.257
3.5898	-0.00128
3.5918	0.267
3.5938	0.383
3.5957	0.298
3.5977	0.0733
3.5996	-0.205
3.6016	-0.37
3.6035	-0.341
3.6055	-0.155
3.6074	0.127
3.6094	0.336
3.6113	0.359
3.6133	0.209
3.6152	-0.0605
3.6172	-0.301
3.6191	-0.373
3.6211	-0.268
3.623	-0.0179
3.625	0.246
3.627	0.364
3.6289	0.298
3.6309	0.0823
3.6328	-0.192
3.6348	-0.345
3.6367	-0.333
3.6387	-0.151
3.6406	0.12
3.6426	0.309
3.6445	0.338
3.6465	0.196
3.6484	-0.0627
3.6504	-0.277
3.6523	-0.342
3.6543	-0.243
3.6563	-0.005
3.6582	0.222
3.6602	0.321
3.6621	0.265
3.6641	0.0534
3.666	-0.179
3.668	-0.308
3.6699	-0.289
3.6719	-0.107
3.6738	0.123
3.6758	0.27
3.6777	0.285
3.6797	0.142
3.6816	-0.0792
3.6836	-0.238
3.6855	-0.285
3.6875	-0.175
3.6895	0.0271
3.6914	0.188
3.6934	0.261
3.6953	0.187
3.6973	0.00705
3.6992	-0.161
3.7012	-0.249
3.7031	-0.2
3.7051	-0.0388
3.707	0.119
3.709	0.212
3.7109	0.193
3.7129	0.0578
3.7148	-0.0842
3.7168	-0.19
3.7188	-0.192
3.7207	-0.0812
3.7227	0.0495
3.7246	0.152
3.7266	0.17
3.7285	0.084
3.7305	-0.0321
3.7324	-0.128
3.7344	-0.153
3.7363	-0.0813
3.7383	0.0123
3.7402	0.0926
3.7422	0.124
3.7441	0.0708
3.7461	-0.000317
3.748	-0.0757
3.75	-0.106
3.752	-0.065
3.7539	-0.00343
3.7559	0.0545
3.7578	0.0814
3.7598	0.0449
3.7617	-0.0012
3.7637	-0.0413
3.7656	-0.0586
3.7676	-0.0238
3.7695	0.00201
3.7715	0.0267
3.7734	0.0347
3.7754	0.00466
3.7773	-0.0159
3.7793	-0.032
3.7813	-0.0237
3.7832	0.0143
3.7852	0.0334
3.7871	0.0309
3.7891	0.0128
3.791	-0.0362
3.793	-0.0485
3.7949	-0.039
3.7969	-0.00453
3.7988	0.0485
3.8008	0.0556
3.8027	0.04
3.8047	-0.002
3.8066	-0.0586
3.8086	-0.0752
3.8105	-0.0553
3.8125	-0.000366
3.8145	0.0726
3.8164	0.0877
3.8184	0.0609
3.8203	-0.00423
3.8223	-0.0831
3.8242	-0.0988
3.8262	-0.0762
3.8281	0.000203
3.8301	0.0809
3.832	0.102
3.834	0.0762
3.8359	0.00208
3.8379	-0.0834
3.8398	-0.108
3.8418	-0.0877
3.8438	-0.00612
3.8457	0.0828
3.8477	0.106
3.8496	0.0858
3.8516	-0.000956
3.8535	-0.0834
3.8555	-0.113
3.8574	-0.0912
3.8594	-0.00438
3.8613	0.0789
3.8633	0.107
3.8652	0.0865
3.8672	0.00171
3.8691	-0.0764
3.8711	-0.105
3.873	-0.0884
3.875	-0.00179
3.877	0.0646
3.8789	0.0958
3.8809	0.0736
3.8828	-0.00373
3.8848	-0.0657
3.8867	-0.0919
3.8887	-0.0659
3.8906	0.0105
3.8926	0.0583
3.8945	0.0779
3.8965	0.0494
3.8984	-0.0185
3.9004	-0.0555
3.9023	-0.0747
[truncated: 2,098 more rows]
