# Supplementary material for: Effect of the Supports’ Positions on the Vibration Characteristics of a Flexible Rotor Shafting
Source: Hindawi journal article supplement (doi:10.1155/2020/1592794), 2020-02-12
Supplement: f1 [file 1592794.f1.zip › 1592794.f1/test_data/Table10_2.xlsx]

## Sheet: Sheet1
Time t/s	vibration deformation amount u/mm
0	-0.000839
0.002	-0.00102
0.0039	-0.00162
0.0059	-0.00208
0.0078	-0.00259
0.0098	-0.00322
0.0117	-0.00325
0.0137	-0.00366
0.0156	-0.00478
0.0176	-0.00576
0.0195	-0.00678
0.0215	-0.007
0.0234	-0.00787
0.0254	-0.00853
0.0273	-0.0101
0.0293	-0.0113
0.0313	-0.0124
0.0332	-0.0131
0.0352	-0.014
0.0371	-0.015
0.0391	-0.0163
0.041	-0.0179
0.043	-0.0193
0.0449	-0.021
0.0469	-0.0229
0.0488	-0.0244
0.0508	-0.026
0.0527	-0.0275
0.0547	-0.0297
0.0566	-0.0317
0.0586	-0.0342
0.0605	-0.0352
0.0625	-0.0363
0.0645	-0.0375
0.0664	-0.0389
0.0684	-0.0398
0.0703	-0.04
0.0723	-0.0387
0.0742	-0.0379
0.0762	-0.0369
0.0781	-0.0369
0.0801	-0.0389
0.082	-0.0408
0.084	-0.0396
0.0859	-0.0355
0.0879	-0.0317
0.0898	-0.0302
0.0918	-0.03
0.0938	-0.0309
0.0957	-0.0306
0.0977	-0.0295
0.0996	-0.0271
0.1016	-0.0241
0.1035	-0.02
0.1055	-0.0181
0.1074	-0.017
0.1094	-0.0178
0.1113	-0.0176
0.1133	-0.0153
0.1152	-0.0117
0.1172	-0.0101
0.1191	-0.0114
0.1211	-0.0149
0.123	-0.0179
0.125	-0.0195
0.127	-0.0193
0.1289	-0.0173
0.1309	-0.0149
0.1328	-0.013
0.1348	-0.0136
0.1367	-0.0165
0.1387	-0.0192
0.1406	-0.0187
0.1426	-0.015
0.1445	-0.00916
0.1465	-0.00425
0.1484	-0.00132
0.1504	-0.000224
0.1523	0.000586
0.1543	0.00104
0.1563	0.00342
0.1582	0.00826
0.1602	0.0152
0.1621	0.0219
0.1641	0.0244
0.166	0.0228
0.168	0.0199
0.1699	0.0185
0.1719	0.0189
0.1738	0.0188
0.1758	0.0174
0.1777	0.0159
0.1797	0.0151
0.1816	0.0135
0.1836	0.0106
0.1855	0.008
0.1875	0.0084
0.1895	0.0102
0.1914	0.0113
0.1934	0.00982
0.1953	0.00685
0.1973	0.00582
0.1992	0.00641
0.2012	0.0076
0.2031	0.00801
0.2051	0.00794
0.207	0.00751
0.209	0.00615
0.2109	0.00372
0.2129	-0.000992
0.2148	-0.00518
0.2168	-0.00846
0.2188	-0.00873
0.2207	-0.0102
0.2227	-0.0134
0.2246	-0.019
0.2266	-0.0245
0.2285	-0.0294
0.2305	-0.0335
0.2324	-0.0365
0.2344	-0.0373
0.2363	-0.0344
0.2383	-0.0304
0.2402	-0.028
0.2422	-0.0299
0.2441	-0.0321
0.2461	-0.0319
0.248	-0.0285
0.25	-0.0239
0.252	-0.0198
0.2539	-0.0157
0.2559	-0.0117
0.2578	-0.00888
0.2598	-0.00972
0.2617	-0.0128
0.2637	-0.0149
0.2656	-0.0141
0.2676	-0.00998
0.2695	-0.00577
0.2715	-0.00337
0.2734	-0.000829
0.2754	0.00164
0.2773	0.00517
0.2793	0.00856
0.2813	0.0129
0.2832	0.0179
0.2852	0.0239
0.2871	0.0281
0.2891	0.0277
0.291	0.0239
0.293	0.0185
0.2949	0.0128
0.2969	0.00893
0.2988	0.00502
0.3008	0.00159
0.3027	0.00179
0.3047	0.00418
0.3066	0.00524
0.3086	0.00405
0.3105	0.00307
0.3125	0.00257
0.3145	0.00351
0.3164	0.00199
0.3184	-0.0014
0.3203	-0.00608
0.3223	-0.0123
0.3242	-0.0197
0.3262	-0.03
0.3281	-0.0395
0.3301	-0.044
0.332	-0.0409
0.334	-0.035
0.3359	-0.0307
0.3379	-0.0282
0.3398	-0.0273
0.3418	-0.0262
0.3438	-0.0216
0.3457	-0.0173
0.3477	-0.0119
0.3496	-0.012
0.3516	-0.0146
0.3535	-0.0188
0.3555	-0.0208
0.3574	-0.0174
0.3594	-0.0103
0.3613	-0.00142
0.3633	0.00684
0.3652	0.0136
0.3672	0.0187
0.3691	0.0202
0.3711	0.019
0.373	0.0179
0.375	0.018
0.377	0.0197
0.3789	0.0194
0.3809	0.0178
0.3828	0.0142
0.3848	0.0115
0.3867	0.0101
0.3887	0.00883
0.3906	0.00807
0.3926	0.00696
0.3945	0.00468
0.3965	0.00105
0.3984	-0.00306
0.4004	-0.00736
0.4023	-0.0106
0.4043	-0.0156
0.4063	-0.0231
0.4082	-0.0299
0.4102	-0.0348
0.4121	-0.0377
0.4141	-0.0383
0.416	-0.0395
0.418	-0.0352
0.4199	-0.0294
0.4219	-0.0221
0.4238	-0.014
0.4258	-0.00933
0.4277	-0.0071
0.4297	-0.0071
0.4316	-0.0106
0.4336	-0.0159
0.4355	-0.0173
0.4375	-0.0125
0.4395	-0.0025
0.4414	0.00993
0.4434	0.0204
0.4453	0.0266
0.4473	0.0277
0.4492	0.0271
0.4512	0.0232
0.4531	0.0163
0.4551	0.00796
0.457	0.0036
0.459	0.00499
0.4609	0.00832
0.4629	0.00848
0.4648	0.00725
0.4668	0.00546
0.4688	0.00566
0.4707	0.00324
0.4727	-0.00396
0.4746	-0.0136
0.4766	-0.0235
0.4785	-0.0314
0.4805	-0.0379
0.4824	-0.041
0.4844	-0.0394
0.4863	-0.0341
0.4883	-0.0247
0.4902	-0.0182
0.4922	-0.0165
0.4941	-0.0189
0.4961	-0.0222
0.498	-0.0207
0.5	-0.017
0.502	-0.0129
0.5039	-0.00739
0.5059	0.00201
0.5078	0.00968
0.5098	0.0145
0.5117	0.0156
0.5137	0.0149
0.5156	0.0156
0.5176	0.0216
0.5195	0.0269
0.5215	0.0262
0.5234	0.022
0.5254	0.0163
0.5273	0.0102
0.5293	0.00165
0.5313	-0.00548
0.5332	-0.00634
0.5352	0.000231
0.5371	0.00663
0.5391	0.00384
0.541	-0.00734
0.543	-0.0239
0.5449	-0.0388
0.5469	-0.0462
0.5488	-0.0467
0.5508	-0.0425
0.5527	-0.033
0.5547	-0.02
0.5566	-0.0126
0.5586	-0.0111
0.5605	-0.0143
0.5625	-0.016
0.5645	-0.014
0.5664	-0.0138
0.5684	-0.0127
0.5703	-0.00923
0.5723	0.000512
0.5742	0.0172
0.5762	0.0304
0.5781	0.0351
0.5801	0.0304
0.582	0.0228
0.584	0.0132
0.5859	0.00442
0.5879	0.00124
0.5898	0.00412
0.5918	0.0124
0.5938	0.02
0.5957	0.0205
0.5977	0.00881
0.5996	-0.00956
0.6016	-0.0237
0.6035	-0.0305
0.6055	-0.0344
0.6074	-0.0354
0.6094	-0.0318
0.6113	-0.0248
0.6133	-0.0232
0.6152	-0.0252
0.6172	-0.0304
0.6191	-0.028
0.6211	-0.0177
0.623	-0.00758
0.625	-0.00272
0.627	-0.00271
0.6289	-0.000664
0.6309	0.00281
0.6328	0.00514
0.6348	0.00705
0.6367	0.0123
0.6387	0.0231
0.6406	0.0352
0.6426	0.0379
0.6445	0.0286
0.6465	0.0135
0.6484	0.000782
0.6504	-0.00814
0.6523	-0.00983
0.6543	-0.00364
0.6563	0.00562
0.6582	0.0115
0.6602	0.00708
0.6621	-0.00945
0.6641	-0.0364
0.666	-0.0567
0.668	-0.0603
0.6699	-0.0483
0.6719	-0.0277
0.6738	-0.01
0.6758	-0.00105
0.6777	-0.00222
0.6797	-0.0112
0.6816	-0.0223
0.6836	-0.029
0.6855	-0.0241
0.6875	-0.00771
0.6895	0.015
0.6914	0.0354
0.6934	0.0426
0.6953	0.0346
0.6973	0.0196
0.6992	0.00606
0.7012	0.000305
0.7031	0.00491
0.7051	0.0168
0.707	0.0256
0.709	0.0264
0.7109	0.0148
0.7129	-0.00538
0.7148	-0.0249
0.7168	-0.0338
0.7188	-0.0325
0.7207	-0.0263
0.7227	-0.0197
0.7246	-0.02
0.7266	-0.0299
0.7285	-0.041
0.7305	-0.0432
0.7324	-0.031
0.7344	-0.011
0.7363	0.00754
0.7383	0.0136
0.7402	0.00726
0.7422	-0.00487
0.7441	-0.0156
0.7461	-0.0113
0.748	0.00612
0.75	0.0305
0.752	0.0513
0.7539	0.0546
0.7559	0.036
0.7578	0.0055
0.7598	-0.0197
0.7617	-0.0267
0.7637	-0.0142
0.7656	0.00827
0.7676	0.0256
0.7695	0.0254
0.7715	0.00501
0.7734	-0.0336
0.7754	-0.0689
0.7773	-0.0801
0.7793	-0.0617
0.7813	-0.0238
0.7832	0.00965
0.7852	0.0208
0.7871	0.00603
0.7891	-0.0197
0.791	-0.038
0.793	-0.0378
0.7949	-0.0196
0.7969	0.00768
0.7988	0.0386
0.8008	0.0558
0.8027	0.0493
0.8047	0.023
0.8066	-0.00488
0.8086	-0.0119
0.8105	0.0029
0.8125	0.0241
0.8145	0.0298
0.8164	0.0198
0.8184	0.00379
0.8203	-0.0142
0.8223	-0.03
0.8242	-0.0423
0.8262	-0.0447
0.8281	-0.0304
0.8301	-0.0173
0.832	-0.0164
0.834	-0.029
0.8359	-0.0381
0.8379	-0.0298
0.8398	-0.0106
0.8418	0.00366
0.8438	0.00316
0.8457	-0.00131
0.8477	-0.00177
0.8496	0.00635
0.8516	0.0165
0.8535	0.0229
0.8555	0.0309
0.8574	0.0374
0.8594	0.0325
0.8613	0.0152
0.8633	-0.00598
0.8652	-0.015
0.8672	-0.00395
0.8691	0.0103
0.8711	0.0114
0.873	-0.00418
0.875	-0.0278
0.877	-0.0455
0.8789	-0.0504
0.8809	-0.0483
0.8828	-0.0365
0.8848	-0.0187
0.8867	-0.00121
0.8887	0.00382
0.8906	-0.00533
0.8926	-0.0173
0.8945	-0.016
0.8965	-0.00283
0.8984	0.015
0.9004	0.0259
0.9023	0.0296
0.9043	0.031
0.9063	0.0308
0.9082	0.0263
0.9102	0.0142
0.9121	0.000509
0.9141	-0.00728
0.916	-0.00459
0.918	0.000155
0.9199	-0.00167
0.9219	-0.00968
0.9238	-0.0228
0.9258	-0.0347
0.9277	-0.0455
0.9297	-0.0521
0.9316	-0.0456
0.9336	-0.0254
0.9355	-0.000905
0.9375	0.0093
0.9395	0.00265
0.9414	-0.0103
0.9434	-0.0157
0.9453	-0.0106
0.9473	0.00788
0.9492	0.0295
0.9512	0.0473
0.9531	0.0506
0.9551	0.0344
0.957	0.0089
0.959	-0.0102
0.9609	-0.0127
0.9629	0.000331
0.9648	0.0122
0.9668	0.0102
0.9688	-0.00387
0.9707	-0.0262
0.9727	-0.0457
0.9746	-0.0541
0.9766	-0.0528
0.9785	-0.0383
0.9805	-0.0158
0.9824	0.00264
0.9844	0.00776
0.9863	9.13e-05
0.9883	-0.00889
0.9902	-0.0115
0.9922	-0.00587
0.9941	0.00789
0.9961	0.0236
0.998	0.0405
1	0.0494
1.002	0.0419
1.0039	0.0182
1.0059	-0.00985
1.0078	-0.0248
1.0098	-0.0188
1.0117	-0.00321
1.0137	0.00875
1.0156	0.00548
1.0176	-0.0149
1.0195	-0.0401
1.0215	-0.0626
1.0234	-0.0676
1.0254	-0.0466
1.0273	-0.00997
1.0293	0.0179
1.0313	0.0207
1.0332	0.00552
1.0352	-0.00797
1.0371	-0.0115
1.0391	-0.000353
1.041	0.0159
1.043	0.0334
1.0449	0.0456
1.0469	0.0468
1.0488	0.0336
1.0508	0.00706
1.0527	-0.0171
1.0547	-0.0257
1.0566	-0.0199
1.0586	-0.00898
1.0605	-0.00622
1.0625	-0.0143
1.0645	-0.0279
1.0664	-0.0456
1.0684	-0.0551
1.0703	-0.0484
1.0723	-0.0258
1.0742	0.00295
1.0762	0.0229
1.0781	0.0245
1.0801	0.00872
1.082	-0.00798
1.084	-0.00993
1.0859	0.0071
1.0879	0.0345
1.0898	0.0518
1.0918	0.0481
1.0938	0.0255
1.0957	-0.00379
1.0977	-0.0223
1.0996	-0.0286
1.1016	-0.0237
1.1035	-0.0154
1.1055	-0.0109
1.1074	-0.0138
1.1094	-0.0283
1.1113	-0.0473
1.1133	-0.051
1.1152	-0.0364
1.1172	-0.0109
1.1191	0.0101
1.1211	0.0225
1.123	0.0251
1.125	0.0216
1.127	0.0128
1.1289	0.00422
1.1309	0.00613
1.1328	0.021
1.1348	0.0408
1.1367	0.0434
1.1387	0.0215
1.1406	-0.0132
1.1426	-0.0399
1.1445	-0.0448
1.1465	-0.0357
1.1484	-0.0217
1.1504	-0.0149
1.1523	-0.0206
1.1543	-0.0289
1.1563	-0.0324
1.1582	-0.0288
1.1602	-0.0173
1.1621	-0.000376
1.1641	0.0166
1.166	0.0277
1.168	0.0312
1.1699	0.0262
1.1719	0.0207
1.1738	0.0172
1.1758	0.0161
1.1777	0.0151
1.1797	0.0134
1.1816	0.0108
1.1836	0.000251
1.1855	-0.0192
1.1875	-0.0413
1.1895	-0.0502
1.1914	-0.0421
1.1934	-0.0287
1.1953	-0.0187
1.1973	-0.0156
1.1992	-0.0118
1.2012	-0.00516
1.2031	0.00447
1.2051	0.0102
1.207	0.0128
1.209	0.016
1.2109	0.0224
1.2129	0.031
1.2148	0.0352
1.2168	0.0304
1.2188	0.0152
1.2207	-0.00328
1.2227	-0.0178
1.2246	-0.0264
1.2266	-0.0269
1.2285	-0.0255
1.2305	-0.022
1.2324	-0.0283
1.2344	-0.0366
1.2363	-0.0387
1.2383	-0.0283
1.2402	-0.0124
1.2422	0.00358
1.2441	0.0171
1.2461	0.025
1.248	0.0311
1.25	0.029
1.252	0.022
1.2539	0.0129
1.2559	0.0135
1.2578	0.0191
1.2598	0.0218
1.2617	0.0103
1.2637	-0.0155
1.2656	-0.04
1.2676	-0.0511
1.2695	-0.0432
1.2715	-0.0323
1.2734	-0.0253
1.2754	-0.0215
1.2773	-0.0137
1.2793	-0.00374
1.2813	0.00367
1.2832	0.00753
1.2852	0.00947
1.2871	0.016
1.2891	0.0256
1.291	0.036
1.293	0.0377
1.2949	0.0287
1.2969	0.00968
1.2988	-0.00754
1.3008	-0.0207
1.3027	-0.0271
1.3047	-0.031
1.3066	-0.0292
1.3086	-0.0254
1.3105	-0.0274
1.3125	-0.03
1.3145	-0.0278
1.3164	-0.0194
1.3184	-0.0052
1.3203	0.0129
1.3223	0.0273
1.3242	0.0346
1.3262	0.0312
1.3281	0.0227
1.3301	0.0145
1.332	0.0152
1.334	0.0173
1.3359	0.0147
1.3379	-0.00176
1.3398	-0.0246
1.3418	-0.0436
1.3438	-0.0455
1.3457	-0.0362
1.3477	-0.0299
1.3496	-0.0274
1.3516	-0.0216
1.3535	-0.0113
1.3555	0.00257
1.3574	0.0106
1.3594	0.0134
1.3613	0.0182
1.3633	0.0275
1.3652	0.0383
1.3672	0.0371
1.3691	0.0229
1.3711	0.00336
1.373	-0.0054
1.375	-0.00996
1.377	-0.0207
1.3789	-0.0384
1.3809	-0.0441
1.3828	-0.0366
1.3848	-0.0241
1.3867	-0.0191
1.3887	-0.0203
1.3906	-0.0153
1.3926	0.0052
1.3945	0.0272
1.3965	0.0348
1.3984	0.0253
1.4004	0.0169
1.4023	0.0195
1.4043	0.0294
1.4063	0.0264
1.4082	0.00887
1.4102	-0.0149
1.4121	-0.031
1.4141	-0.0375
1.416	-0.0364
1.418	-0.0348
1.4199	-0.0352
1.4219	-0.0288
1.4238	-0.0145
1.4258	-0.0027
1.4277	0.00408
1.4297	0.00889
1.4316	0.0181
1.4336	0.0317
1.4355	0.0381
1.4375	0.0332
1.4395	0.0217
1.4414	0.0117
1.4434	0.00686
1.4453	-0.00397
1.4473	-0.0253
1.4492	-0.0467
1.4512	-0.0494
1.4531	-0.0347
1.4551	-0.0226
1.457	-0.0203
1.459	-0.022
1.4609	-0.0136
1.4629	0.00861
1.4648	0.0271
1.4668	0.0294
1.4688	0.0216
1.4707	0.0203
1.4727	0.031
1.4746	0.0364
1.4766	0.0211
1.4785	-0.00667
1.4805	-0.0305
1.4824	-0.0379
1.4844	-0.0363
1.4863	-0.0331
1.4883	-0.0341
1.4902	-0.0308
1.4922	-0.0161
1.4941	-0.00396
1.4961	0.00409
1.498	0.00919
1.5	0.0184
1.502	0.0328
1.5039	0.0396
1.5059	0.0327
1.5078	0.0188
1.5098	0.0103
1.5117	0.00735
1.5137	-0.00608
1.5156	-0.0321
1.5176	-0.0559
1.5195	-0.0511
1.5215	-0.0297
1.5234	-0.0156
1.5254	-0.0171
1.5273	-0.0215
1.5293	-0.00724
1.5313	0.018
1.5332	0.0333
1.5352	0.0289
1.5371	0.0215
1.5391	0.0276
1.541	0.0369
1.543	0.0266
1.5449	-0.00147
1.5469	-0.0282
1.5488	-0.0394
1.5508	-0.0384
1.5527	-0.0332
1.5547	-0.0355
1.5566	-0.033
1.5586	-0.0186
1.5605	0.000165
1.5625	0.0136
1.5645	0.0194
1.5664	0.0214
1.5684	0.0252
1.5703	0.0307
1.5723	0.0315
1.5742	0.0242
1.5762	0.0122
1.5781	-0.00115
1.5801	-0.0203
1.582	-0.0435
1.584	-0.0545
1.5859	-0.0455
1.5879	-0.0292
1.5898	-0.0164
1.5918	-0.0117
1.5938	-0.00529
1.5957	0.00982
1.5977	0.0269
1.5996	0.035
1.6016	0.0327
1.6035	0.0283
1.6055	0.0275
1.6074	0.0212
1.6094	0.00633
1.6113	-0.0191
1.6133	-0.0437
1.6152	-0.0521
1.6172	-0.0424
1.6191	-0.0304
1.6211	-0.0216
1.623	-0.014
1.625	-0.00206
1.627	0.0167
1.6289	0.0289
1.6309	0.0284
1.6328	0.0209
1.6348	0.0224
1.6367	0.032
1.6387	0.0311
1.6406	0.0115
1.6426	-0.0214
1.6445	-0.0483
1.6465	-0.0546
1.6484	-0.0409
1.6504	-0.0308
1.6523	-0.0222
1.6543	-0.012
1.6563	0.00375
1.6582	0.0215
1.6602	0.0273
1.6621	0.025
1.6641	0.0226
1.666	0.0289
1.668	0.0335
1.6699	0.0265
1.6719	0.00411
1.6738	-0.0262
1.6758	-0.0523
1.6777	-0.0582
1.6797	-0.0463
1.6816	-0.0314
1.6836	-0.016
1.6855	-0.00419
1.6875	0.00977
1.6895	0.0213
1.6914	0.0244
1.6934	0.0202
1.6953	0.0229
1.6973	0.0334
1.6992	0.0375
1.7012	0.0207
1.7031	-0.0101
1.7051	-0.0416
1.707	-0.058
1.709	-0.0525
1.7109	-0.0402
1.7129	-0.0241
1.7148	-0.00713
1.7168	0.0105
1.7188	0.0266
1.7207	0.0311
1.7227	0.0233
1.7246	0.0158
1.7266	0.0194
1.7285	0.03
1.7305	0.0311
1.7324	0.012
1.7344	-0.0256
1.7363	-0.0604
1.7383	-0.0654
1.7402	-0.0495
1.7422	-0.0311
1.7441	-0.0152
1.7461	0.0032
1.748	0.0265
1.75	0.0401
1.752	0.033
1.7539	0.0176
1.7559	0.0145
1.7578	0.026
1.7598	0.029
1.7617	0.012
1.7637	-0.0215
1.7656	-0.0513
1.7676	-0.059
1.7695	-0.0516
1.7715	-0.0398
1.7734	-0.0211
1.7754	0.00367
1.7773	0.0331
1.7793	0.0478
1.7813	0.0371
1.7832	0.0161
1.7852	0.00867
1.7871	0.0181
1.7891	0.024
1.791	0.00889
1.793	-0.0255
1.7949	-0.0542
1.7969	-0.0549
1.7988	-0.0441
1.8008	-0.0355
1.8027	-0.0247
1.8047	0.00181
1.8066	0.0382
1.8086	0.057
1.8105	0.0454
1.8125	0.0207
1.8145	0.01
1.8164	0.0125
1.8184	0.012
1.8203	-0.00797
1.8223	-0.0394
1.8242	-0.0549
1.8262	-0.0465
1.8281	-0.036
1.8301	-0.0297
1.832	-0.0213
1.834	0.00905
1.8359	0.0458
1.8379	0.0579
1.8398	0.0387
1.8418	0.0176
1.8438	0.0129
1.8457	0.0141
1.8477	-0.00221
1.8496	-0.0345
1.8516	-0.0566
1.8535	-0.0476
1.8555	-0.0292
1.8574	-0.0216
1.8594	-0.0231
1.8613	-0.00697
1.8633	0.0291
1.8652	0.0552
1.8672	0.0507
1.8691	0.0287
1.8711	0.0149
1.873	0.0133
1.875	0.00505
1.877	-0.0252
1.8789	-0.0608
1.8809	-0.0636
1.8828	-0.0401
1.8848	-0.0164
1.8867	-0.0108
1.8887	-0.00583
1.8906	0.0173
1.8926	0.0442
1.8945	0.0516
1.8965	0.0362
1.8984	0.0199
1.9004	0.0116
1.9023	0.00471
1.9043	-0.019
1.9063	-0.0528
1.9082	-0.0656
1.9102	-0.052
1.9121	-0.0254
1.9141	-0.00599
1.916	0.00846
1.918	0.0274
1.9199	0.0436
1.9219	0.0438
1.9238	0.0314
1.9258	0.0168
1.9277	0.0073
1.9297	-0.0015
1.9316	-0.0234
1.9336	-0.0506
1.9355	-0.0584
1.9375	-0.0486
1.9395	-0.0286
1.9414	-0.00902
1.9434	0.0135
1.9453	0.0368
1.9473	0.0504
1.9492	0.0464
1.9512	0.0332
1.9531	0.0159
1.9551	-0.000563
1.957	-0.0175
1.959	-0.0393
1.9609	-0.0524
1.9629	-0.0501
1.9648	-0.0394
1.9668	-0.0239
1.9688	-0.00372
1.9707	0.0241
1.9727	0.0452
1.9746	0.0459
1.9766	0.0345
1.9785	0.0271
1.9805	0.0179
1.9824	-0.00103
1.9844	-0.0327
1.9863	-0.0592
1.9883	-0.0565
1.9902	-0.039
1.9922	-0.0241
1.9941	-0.0127
1.9961	0.0091
1.998	0.0383
2	0.0524
2.002	0.0439
2.0039	0.0273
2.0059	0.0166
2.0078	0.00679
2.0098	-0.0138
2.0117	-0.0471
2.0137	-0.0651
2.0156	-0.0563
2.0176	-0.0351
2.0195	-0.0149
2.0215	0.00624
2.0234	0.0313
2.0254	0.049
2.0273	0.049
2.0293	0.0366
2.0313	0.0231
2.0332	0.00504
2.0352	-0.0177
2.0371	-0.0439
2.0391	-0.0558
2.041	-0.0497
2.043	-0.0385
2.0449	-0.0248
2.0469	-0.00118
2.0488	0.0335
2.0508	0.054
2.0527	0.049
2.0547	0.032
2.0566	0.021
2.0586	0.011
2.0605	-0.0118
2.0625	-0.0476
2.0645	-0.0665
2.0664	-0.0544
2.0684	-0.0326
2.0703	-0.0174
2.0723	-0.00097
2.0742	0.028
2.0762	0.0518
2.0781	0.0542
2.0801	0.0395
2.082	0.021
2.084	0.00361
2.0859	-0.0184
2.0879	-0.047
2.0898	-0.061
2.0918	-0.0555
2.0938	-0.0375
2.0957	-0.018
2.0977	0.00778
2.0996	0.0395
2.1016	0.0531
2.1035	0.045
2.1055	0.0311
2.1074	0.0208
2.1094	0.00575
2.1113	-0.0239
2.1133	-0.058
2.1152	-0.0649
2.1172	-0.0477
2.1191	-0.0263
2.1211	-0.011
2.123	0.0131
2.125	0.0442
2.127	0.06
2.1289	0.0517
2.1309	0.0295
2.1328	0.0077
2.1348	-0.0099
2.1367	-0.0357
2.1387	-0.0583
2.1406	-0.0607
2.1426	-0.047
2.1445	-0.0252
2.1465	0.00175
2.1484	0.0323
2.1504	0.0522
2.1523	0.0512
2.1543	0.04
2.1563	0.0276
2.1582	0.00792
2.1602	-0.0243
2.1621	-0.0582
2.1641	-0.066
2.166	-0.0501
2.168	-0.0301
2.1699	-0.0132
2.1719	0.0145
2.1738	0.0485
2.1758	0.0608
2.1777	0.0486
2.1797	0.0276
2.1816	0.00803
2.1836	-0.0114
2.1855	-0.0403
2.1875	-0.0617
2.1895	-0.0604
2.1914	-0.044
2.1934	-0.0212
2.1953	0.00776
2.1973	0.0407
2.1992	0.0579
2.2012	0.0538
2.2031	0.0408
2.2051	0.0229
2.207	-0.0049
2.209	-0.0429
2.2109	-0.0694
2.2129	-0.0628
2.2148	-0.042
2.2168	-0.0228
2.2188	-0.00151
2.2207	0.0337
2.2227	0.0609
2.2246	0.0576
2.2266	0.0365
2.2285	0.0162
2.2305	-0.00177
2.2324	-0.0266
2.2344	-0.0566
2.2363	-0.065
2.2383	-0.0523
2.2402	-0.0302
2.2422	-0.00187
2.2441	0.033
2.2461	0.0586
2.248	0.0599
2.25	0.0474
2.252	0.0275
2.2539	0.000119
2.2559	-0.0376
2.2578	-0.0679
2.2598	-0.0677
2.2617	-0.0476
2.2637	-0.0266
2.2656	-0.00314
2.2676	0.0316
2.2695	0.0596
2.2715	0.0594
2.2734	0.0419
2.2754	0.0227
2.2773	0.000715
2.2793	-0.0309
2.2813	-0.0618
2.2832	-0.0665
2.2852	-0.0516
2.2871	-0.0301
2.2891	-0.00164
2.291	0.0391
2.293	0.0656
2.2949	0.0624
2.2969	0.0426
2.2988	0.0187
2.3008	-0.00827
2.3027	-0.0435
2.3047	-0.0703
2.3066	-0.0653
2.3086	-0.0442
2.3105	-0.0197
2.3125	0.00846
2.3145	0.0423
2.3164	0.063
2.3184	0.0572
2.3203	0.0405
2.3223	0.0172
2.3242	-0.0125
2.3262	-0.0503
2.3281	-0.0704
2.3301	-0.0629
2.332	-0.0436
2.334	-0.0198
2.3359	0.0163
2.3379	0.0571
2.3398	0.0696
2.3418	0.0545
2.3438	0.0311
2.3457	0.00449
2.3477	-0.0268
2.3496	-0.0616
2.3516	-0.0709
2.3535	-0.0551
2.3555	-0.0318
2.3574	-0.00406
2.3594	0.0328
2.3613	0.0621
2.3633	0.0631
2.3652	0.0476
2.3672	0.0252
2.3691	-0.00266
2.3711	-0.0411
2.373	-0.0714
2.375	-0.0691
2.377	-0.0491
2.3789	-0.0255
2.3809	0.00674
2.3828	0.0479
2.3848	0.0704
2.3867	0.0621
2.3887	0.04
2.3906	0.0121
2.3926	-0.0223
2.3945	-0.0599
2.3965	-0.0733
2.3984	-0.0595
2.4004	-0.0359
2.4023	-0.00924
2.4043	0.0311
2.4063	0.0653
2.4082	0.0669
2.4102	0.0476
2.4121	0.023
2.4141	-0.004
2.416	-0.0401
2.418	-0.0702
2.4199	-0.069
2.4219	-0.0495
2.4238	-0.0239
2.4258	0.0103
2.4277	0.0503
2.4297	0.0709
2.4316	0.0623
2.4336	0.0411
2.4355	0.0119
2.4375	-0.0274
2.4395	-0.067
2.4414	-0.0767
2.4434	-0.0585
2.4453	-0.0326
2.4473	-0.00381
2.4492	0.0393
2.4512	0.0704
2.4531	0.0664
2.4551	0.044
2.457	0.0171
2.459	-0.0139
2.4609	-0.0511
2.4629	-0.0733
2.4648	-0.0639
2.4668	-0.0428
2.4688	-0.0157
2.4707	0.0218
2.4727	0.0612
2.4746	0.072
2.4766	0.0579
2.4785	0.0318
2.4805	7.98e-05
2.4824	-0.0418
2.4844	-0.0756
2.4863	-0.0752
2.4883	-0.0536
2.4902	-0.0262
2.4922	0.0116
2.4941	0.0571
2.4961	0.0761
2.498	0.0628
2.5	0.0367
2.502	0.00543
2.5039	-0.0332
2.5059	-0.0703
2.5078	-0.0754
2.5098	-0.0547
2.5117	-0.0278
2.5137	0.00397
2.5156	0.0475
2.5176	0.0733
2.5195	0.0661
2.5215	0.042
2.5234	0.0116
2.5254	-0.0251
2.5273	-0.0647
2.5293	-0.0778
2.5313	-0.0617
2.5332	-0.0374
2.5352	-0.0039
2.5371	0.0409
2.5391	0.0743
2.541	0.0723
2.543	0.0505
2.5449	0.0193
2.5469	-0.021
2.5488	-0.0656
2.5508	-0.0828
2.5527	-0.065
2.5547	-0.0372
2.5566	-0.00511
2.5586	0.04
2.5605	0.0747
2.5625	0.0716
2.5645	0.048
2.5664	0.0156
2.5684	-0.0201
2.5703	-0.0608
2.5723	-0.0794
2.5742	-0.0648
2.5762	-0.0397
2.5781	-0.00814
2.5801	0.037
2.582	0.0734
2.584	0.0743
2.5859	0.0539
2.5879	0.0223
2.5898	-0.0172
2.5918	-0.0634
2.5938	-0.0847
2.5957	-0.0703
2.5977	-0.0432
2.5996	-0.00813
2.6016	0.0402
2.6035	0.0779
2.6055	0.0765
2.6074	0.0523
2.6094	0.0184
2.6113	-0.0237
2.6133	-0.0685
2.6152	-0.0845
2.6172	-0.0661
2.6191	-0.0362
2.6211	-0.000545
2.623	0.0472
2.625	0.0793
2.627	0.0736
2.6289	0.0469
2.6309	0.0121
2.6328	-0.0296
2.6348	-0.0723
2.6367	-0.0827
2.6387	-0.0633
2.6406	-0.035
2.6426	0.00356
2.6445	0.0533
2.6465	0.0825
2.6484	0.0744
2.6504	0.0471
2.6523	0.00821
2.6543	-0.0399
2.6563	-0.0822
2.6582	-0.0854
2.6602	-0.0595
2.6621	-0.027
2.6641	0.0171
2.666	0.0685
2.668	0.086
2.6699	0.0673
2.6719	0.0331
2.6738	-0.00746
2.6758	-0.0539
2.6777	-0.0855
2.6797	-0.0774
2.6816	-0.0502
2.6836	-0.0153
2.6855	0.0322
2.6875	0.0768
2.6895	0.0836
2.6914	0.0615
2.6934	0.0255
2.6953	-0.0189
2.6973	-0.0688
2.6992	-0.0887
2.7012	-0.0726
2.7031	-0.044
2.7051	-0.005
2.707	0.0502
2.709	0.0866
2.7109	0.0812
2.7129	0.0515
2.7148	0.0103
2.7168	-0.0396
2.7188	-0.0844
2.7207	-0.0887
2.7227	-0.0631
2.7246	-0.0276
2.7266	0.0218
2.7285	0.0758
2.7305	0.0922
2.7324	0.0705
2.7344	0.0312
2.7363	-0.016
2.7383	-0.0671
2.7402	-0.0923
2.7422	-0.0769
2.7441	-0.0469
2.7461	-0.00676
2.748	0.0484
2.75	0.0889
2.752	0.0853
2.7539	0.0554
2.7559	0.0117
2.7578	-0.0415
2.7598	-0.0871
2.7617	-0.0909
2.7637	-0.0638
2.7656	-0.0284
2.7676	0.023
2.7695	0.0793
2.7715	0.0954
2.7734	0.0714
2.7754	0.0283
2.7773	-0.0226
2.7793	-0.0748
2.7813	-0.0952
2.7832	-0.0768
2.7852	-0.0435
2.7871	0.00239
2.7891	0.0619
2.791	0.0974
2.793	0.0857
2.7949	0.048
2.7969	-0.00255
2.7988	-0.0592
2.8008	-0.0954
2.8027	-0.0857
2.8047	-0.056
2.8066	-0.018
2.8086	0.0402
2.8105	0.0914
2.8125	0.0943
2.8145	0.0632
2.8164	0.0137
2.8184	-0.0429
2.8203	-0.0904
2.8223	-0.0941
2.8242	-0.0676
2.8262	-0.0305
2.8281	0.0272
2.8301	0.0882
2.832	0.105
2.834	0.0757
2.8359	0.0243
2.8379	-0.0353
2.8398	-0.0891
2.8418	-0.0996
2.8438	-0.0737
2.8457	-0.0383
2.8477	0.0147
2.8496	0.0799
2.8516	0.108
2.8535	0.0851
2.8555	0.0353
2.8574	-0.0272
2.8594	-0.0856
2.8613	-0.104
2.8633	-0.0781
2.8652	-0.0421
2.8672	0.00835
2.8691	0.0756
2.8711	0.109
2.873	0.0905
2.875	0.0395
2.877	-0.0249
2.8789	-0.0848
2.8809	-0.104
2.8828	-0.0806
2.8848	-0.0459
2.8867	0.00295
2.8887	0.0711
2.8906	0.112
2.8926	0.0983
2.8945	0.0467
2.8965	-0.0225
2.8984	-0.0878
2.9004	-0.109
2.9023	-0.082
2.9043	-0.0469
2.9063	0.00122
2.9082	0.0717
2.9102	0.113
2.9121	0.101
2.9141	0.0471
2.916	-0.0257
2.918	-0.0927
2.9199	-0.111
2.9219	-0.0812
2.9238	-0.0434
2.9258	0.00759
2.9277	0.0781
2.9297	0.118
2.9316	0.102
2.9336	0.0429
2.9355	-0.037
2.9375	-0.106
2.9395	-0.114
2.9414	-0.0763
2.9434	-0.0367
2.9453	0.0164
2.9473	0.085
2.9492	0.121
2.9512	0.101
2.9531	0.0353
2.9551	-0.0523
2.957	-0.118
2.959	-0.115
2.9609	-0.0679
2.9629	-0.0242
2.9648	0.0322
2.9668	0.097
2.9688	0.121
2.9707	0.0924
2.9727	0.0179
2.9746	-0.0748
2.9766	-0.13
2.9785	-0.108
2.9805	-0.0566
2.9824	-0.0099
2.9844	0.0503
2.9863	0.108
2.9883	0.121
2.9902	0.0822
2.9922	-0.00218
2.9941	-0.0991
2.9961	-0.139
2.998	-0.097
3	-0.0405
3.002	0.00878
3.0039	0.0702
3.0059	0.114
3.0078	0.114
3.0098	0.0641
3.0117	-0.033
3.0137	-0.125
3.0156	-0.14
3.0176	-0.0813
3.0195	-0.0201
3.0215	0.0379
3.0234	0.0949
3.0254	0.121
3.0273	0.104
3.0293	0.035
3.0313	-0.0749
3.0332	-0.152
3.0352	-0.131
3.0371	-0.0585
3.0391	0.00734
3.041	0.0699
3.043	0.112
3.0449	0.118
3.0469	0.0825
3.0488	-0.00846
3.0508	-0.12
3.0527	-0.162
3.0547	-0.106
3.0566	-0.0245
3.0586	0.0497
3.0605	0.105
3.0625	0.12
3.0645	0.101
3.0664	0.0412
3.0684	-0.0671
3.0703	-0.157
3.0723	-0.148
3.0742	-0.0693
3.0762	0.0187
3.0781	0.0927
3.0801	0.125
3.082	0.113
3.084	0.0718
3.0859	-0.0145
3.0879	-0.123
3.0898	-0.167
3.0918	-0.114
3.0938	-0.0237
3.0957	0.069
3.0977	0.126
3.0996	0.123
3.1016	0.0882
3.1035	0.0206
3.1055	-0.0827
3.1074	-0.16
3.1094	-0.144
3.1113	-0.066
3.1133	0.0348
3.1152	0.121
3.1172	0.143
3.1191	0.108
3.1211	0.045
3.123	-0.0528
3.125	-0.147
3.127	-0.16
3.1289	-0.1
3.1309	-0.00317
3.1328	0.102
3.1348	0.153
3.1367	0.132
3.1387	0.068
3.1406	-0.0293
3.1426	-0.133
3.1445	-0.168
3.1465	-0.121
3.1484	-0.0309
3.1504	0.08
3.1523	0.156
3.1543	0.151
3.1563	0.0887
3.1582	-0.0117
3.1602	-0.125
3.1621	-0.175
3.1641	-0.135
3.166	-0.0495
3.168	0.0601
3.1699	0.15
3.1719	0.163
3.1738	0.11
3.1758	0.00917
3.1777	-0.114
3.1797	-0.183
3.1816	-0.148
3.1836	-0.0611
3.1855	0.048
3.1875	0.143
3.1895	0.165
3.1914	0.121
3.1934	0.0256
3.1953	-0.102
3.1973	-0.185
3.1992	-0.161
3.2012	-0.0729
3.2031	0.0411
3.2051	0.142
3.207	0.172
3.209	0.129
3.2109	0.0363
3.2129	-0.095
3.2148	-0.189
3.2168	-0.172
3.2188	-0.0839
3.2207	0.0366
3.2227	0.146
3.2246	0.177
3.2266	0.136
3.2285	0.0401
3.2305	-0.094
3.2324	-0.191
3.2344	-0.179
3.2363	-0.0896
3.2383	0.0377
3.2402	0.155
3.2422	0.188
3.2441	0.138
3.2461	0.0335
3.248	-0.108
3.25	-0.201
3.252	-0.182
3.2539	-0.087
3.2559	0.0455
3.2578	0.165
3.2598	0.197
3.2617	0.142
3.2637	0.0235
3.2656	-0.125
3.2676	-0.213
3.2695	-0.179
3.2715	-0.0749
3.2734	0.0645
3.2754	0.18
3.2773	0.198
3.2793	0.132
3.2813	0.00319
3.2832	-0.149
3.2852	-0.222
3.2871	-0.172
3.2891	-0.0545
3.291	0.091
3.293	0.196
3.2949	0.199
3.2969	0.118
3.2988	-0.0245
3.3008	-0.179
3.3027	-0.23
3.3047	-0.158
3.3066	-0.0274
3.3086	0.124
3.3105	0.211
3.3125	0.193
3.3145	0.0954
3.3164	-0.0628
3.3184	-0.207
3.3203	-0.229
3.3223	-0.137
3.3242	0.0103
3.3262	0.163
3.3281	0.228
3.3301	0.181
3.332	0.0567
3.334	-0.117
3.3359	-0.239
3.3379	-0.22
3.3398	-0.103
3.3418	0.0604
3.3438	0.202
3.3457	0.236
3.3477	0.161
3.3496	0.00737
3.3516	-0.175
3.3535	-0.262
3.3555	-0.197
3.3574	-0.0523
3.3594	0.124
3.3613	0.237
3.3633	0.227
3.3652	0.117
3.3672	-0.0644
3.3691	-0.233
3.3711	-0.264
3.373	-0.158
3.375	0.0164
3.377	0.191
3.3789	0.263
3.3809	0.206
3.3828	0.0543
3.3848	-0.149
3.3867	-0.282
3.3887	-0.245
3.3906	-0.0967
3.3926	0.102
3.3945	0.25
3.3965	0.264
3.3984	0.159
3.4004	-0.0348
3.4023	-0.235
3.4043	-0.299
3.4063	-0.199
3.4082	-0.00902
3.4102	0.195
3.4121	0.293
3.4141	0.242
3.416	0.0781
3.418	-0.15
3.4199	-0.307
3.4219	-0.282
3.4238	-0.12
3.4258	0.105
3.4277	0.278
3.4297	0.301
3.4316	0.182
3.4336	-0.037
3.4355	-0.264
3.4375	-0.335
3.4395	-0.222
3.4414	-0.00322
3.4434	0.227
3.4453	0.327
3.4473	0.263
3.4492	0.0715
3.4512	-0.184
3.4531	-0.345
3.4551	-0.305
3.457	-0.113
3.459	0.142
3.4609	0.324
3.4629	0.329
3.4648	0.176
3.4668	-0.0829
3.4688	-0.321
3.4707	-0.365
3.4727	-0.215
3.4746	0.0435
3.4766	0.285
3.4785	0.366
3.4805	0.266
3.4824	0.0252
3.4844	-0.257
3.4863	-0.396
3.4883	-0.305
3.4902	-0.0621
3.4922	0.224
3.4941	0.384
3.4961	0.341
3.498	0.129
3.5	-0.178
3.502	-0.397
3.5039	-0.379
3.5059	-0.166
3.5078	0.142
3.5098	0.373
3.5117	0.4
3.5137	0.228
3.5156	-0.0812
3.5176	-0.37
3.5195	-0.433
3.5215	-0.263
3.5234	0.0487
3.5254	0.34
3.5273	0.437
3.5293	0.314
3.5313	0.0173
3.5332	-0.318
3.5352	-0.464
3.5371	-0.347
3.5391	-0.0483
3.541	0.286
3.543	0.459
3.5449	0.391
3.5469	0.12
3.5488	-0.251
3.5508	-0.479
3.5527	-0.424
3.5547	-0.146
3.5566	0.222
3.5586	0.459
3.5605	0.454
3.5625	0.215
3.5645	-0.169
3.5664	-0.468
3.5684	-0.486
3.5703	-0.242
3.5723	0.145
3.5742	0.449
3.5762	0.507
3.5781	0.308
3.5801	-0.0851
3.582	-0.447
3.584	-0.535
3.5859	-0.331
3.5879	0.0643
3.5898	0.423
3.5918	0.545
3.5938	0.39
3.5957	0.00307
3.5977	-0.409
3.5996	-0.568
3.6016	-0.411
3.6035	-0.0187
3.6055	0.385
3.6074	0.569
3.6094	0.465
3.6113	0.0943
3.6133	-0.357
3.6152	-0.59
3.6172	-0.488
3.6191	-0.107
3.6211	0.342
3.623	0.591
3.625	0.539
3.627	0.189
3.6289	-0.299
3.6309	-0.605
3.6328	-0.568
3.6348	-0.205
3.6367	0.285
3.6387	0.605
3.6406	0.616
3.6426	0.289
3.6445	-0.233
3.6465	-0.615
3.6484	-0.643
3.6504	-0.305
3.6523	0.225
3.6543	0.614
3.6563	0.689
3.6582	0.386
3.6602	-0.169
3.6621	-0.623
3.6641	-0.713
3.666	-0.391
3.668	0.171
3.6699	0.622
3.6719	0.749
3.6738	0.47
3.6758	-0.107
3.6777	-0.624
3.6797	-0.777
3.6816	-0.475
3.6836	0.12
3.6855	0.634
3.6875	0.814
3.6895	0.551
3.6914	-0.0567
3.6934	-0.632
3.6953	-0.837
3.6973	-0.549
3.6992	0.0817
3.7012	0.655
3.7031	0.876
3.7051	0.615
3.707	-0.0286
3.709	-0.655
3.7109	-0.894
3.7129	-0.599
3.7148	0.0651
3.7168	0.679
3.7188	0.924
3.7207	0.663
3.7227	-0.00378
3.7246	-0.674
3.7266	-0.952
3.7285	-0.655
3.7305	0.0555
3.7324	0.723
3.7344	0.986
3.7363	0.697
3.7383	-0.0179
3.7402	-0.718
3.7422	-0.995
3.7441	-0.669
3.7461	0.0745
3.748	0.765
3.75	1.03
3.752	0.71
3.7539	-0.0396
3.7559	-0.767
3.7578	-1.04
3.7598	-0.675
3.7617	0.114
3.7637	0.825
3.7656	1.07
3.7676	0.701
3.7695	-0.0848
3.7715	-0.82
3.7734	-1.07
3.7754	-0.664
3.7773	0.165
3.7793	0.886
3.7813	1.1
3.7832	0.681
3.7852	-0.147
3.7871	-0.889
3.7891	-1.1
3.791	-0.627
3.793	0.243
3.7949	0.956
3.7969	1.11
3.7988	0.634
3.8008	-0.224
3.8027	-0.953
3.8047	-1.12
3.8066	-0.581
3.8086	0.33
3.8105	1.03
3.8125	1.13
3.8145	0.571
3.8164	-0.323
3.8184	-1.03
3.8203	-1.11
3.8223	-0.501
3.8242	0.436
3.8262	1.1
3.8281	1.11
3.8301	0.486
3.832	-0.429
3.834	-1.09
3.8359	-1.1
3.8379	-0.404
3.8398	0.559
3.8418	1.17
3.8438	1.09
3.8457	0.377
3.8477	-0.552
3.8496	-1.16
3.8516	-1.06
3.8535	-0.283
3.8555	0.689
3.8574	1.22
3.8594	1.04
3.8613	0.246
3.8633	-0.69
3.8652	-1.21
3.8672	-0.994
3.8691	-0.129
3.8711	0.83
3.873	1.25
3.875	0.949
3.877	0.0936
3.8789	-0.823
3.8809	-1.25
3.8828	-0.903
3.8848	0.043
3.8867	0.963
3.8887	1.26
3.8906	0.841
3.8926	-0.0832
3.8945	-0.959
3.8965	-1.25
3.8984	-0.778
3.9004	0.234
3.9023	1.08
[truncated: 2,098 more rows]
