# Supplementary material for: Effect of the Supports’ Positions on the Vibration Characteristics of a Flexible Rotor Shafting
Source: Hindawi journal article supplement (doi:10.1155/2020/1592794), 2020-02-12
Supplement: f1 [file 1592794.f1.zip › 1592794.f1/test_data/Table10_3.xlsx]

## Sheet: Sheet1
Time t/s	vibration deformation amount u/mm
0	0.000706
0.002	0.00148
0.0039	0.000884
0.0059	0.00148
0.0078	0.00135
0.0098	0.00172
0.0117	0.00156
0.0137	0.00144
0.0156	0.0014
0.0176	0.00182
0.0195	0.002
0.0215	0.00191
0.0234	0.00203
0.0254	0.00259
0.0273	0.00259
0.0293	0.00215
0.0313	0.00164
0.0332	0.0027
0.0352	0.00277
0.0371	0.00216
0.0391	0.00298
0.041	0.00266
0.043	0.0018
0.0449	0.00282
0.0469	0.00395
0.0488	0.00345
0.0508	0.00325
0.0527	0.00415
0.0547	0.00386
0.0566	0.00337
0.0586	0.00405
0.0605	0.00394
0.0625	0.00406
0.0645	0.00503
0.0664	0.0046
0.0684	0.00433
0.0703	0.00473
0.0723	0.00432
0.0742	0.00458
0.0762	0.00548
0.0781	0.00548
0.0801	0.00534
0.082	0.00643
0.084	0.00509
0.0859	0.00629
0.0879	0.00552
0.0898	0.00548
0.0918	0.00543
0.0938	0.00671
0.0957	0.00658
0.0977	0.00635
0.0996	0.00678
0.1016	0.00674
0.1035	0.00656
0.1055	0.00664
0.1074	0.0074
0.1094	0.00716
0.1113	0.00754
0.1133	0.00795
0.1152	0.00793
0.1172	0.00775
0.1191	0.00755
0.1211	0.00799
0.123	0.008
0.125	0.00822
0.127	0.00932
0.1289	0.00863
0.1309	0.00908
0.1328	0.00851
0.1348	0.00898
0.1367	0.00929
0.1387	0.0092
0.1406	0.00985
0.1426	0.00988
0.1445	0.0106
0.1465	0.00996
0.1484	0.00958
0.1504	0.00979
0.1523	0.0101
0.1543	0.0104
0.1563	0.011
0.1582	0.011
0.1602	0.0108
0.1621	0.0107
0.1641	0.0103
0.166	0.0101
0.168	0.0104
0.1699	0.011
0.1719	0.0117
0.1738	0.0121
0.1758	0.0119
0.1777	0.0109
0.1797	0.0109
0.1816	0.011
0.1836	0.0115
0.1855	0.0123
0.1875	0.0123
0.1895	0.0122
0.1914	0.0127
0.1934	0.0123
0.1953	0.0121
0.1973	0.0125
0.1992	0.0132
0.2012	0.0139
0.2031	0.0143
0.2051	0.0137
0.207	0.0132
0.209	0.0118
0.2109	0.0119
0.2129	0.0127
0.2148	0.0134
0.2168	0.0141
0.2188	0.0143
0.2207	0.0137
0.2227	0.0122
0.2246	0.0106
0.2266	0.00993
0.2285	0.0106
0.2305	0.011
0.2324	0.0113
0.2344	0.0101
0.2363	0.00782
0.2383	0.0061
0.2402	0.00465
0.2422	0.00441
0.2441	0.00409
0.2461	0.00408
0.248	0.00388
0.25	0.00266
0.252	0.000757
0.2539	-0.00143
0.2559	-0.00353
0.2578	-0.00422
0.2598	-0.00427
0.2617	-0.00411
0.2637	-0.00503
0.2656	-0.00608
0.2676	-0.00801
0.2695	-0.01
0.2715	-0.0112
0.2734	-0.0115
0.2754	-0.0108
0.2773	-0.00877
0.2793	-0.00788
0.2813	-0.00867
0.2832	-0.0106
0.2852	-0.0118
0.2871	-0.0105
0.2891	-0.00702
0.291	-0.00348
0.293	-0.00257
0.2949	-0.003
0.2969	-0.00368
0.2988	-0.00263
0.3008	0.000313
0.3027	0.00316
0.3047	0.00639
0.3066	0.00866
0.3086	0.0104
0.3105	0.0111
0.3125	0.0113
0.3145	0.0119
0.3164	0.0145
0.3184	0.018
0.3203	0.0213
0.3223	0.0216
0.3242	0.0183
0.3262	0.0137
0.3281	0.00877
0.3301	0.00539
0.332	0.00522
0.334	0.00819
0.3359	0.0112
0.3379	0.0121
0.3398	0.00913
0.3418	0.0043
0.3438	0.000852
0.3457	0.000749
0.3477	0.00334
0.3496	0.0075
0.3516	0.0117
0.3535	0.0146
0.3555	0.0149
0.3574	0.0124
0.3594	0.0102
0.3613	0.0112
0.3633	0.0164
0.3652	0.0236
0.3672	0.0285
0.3691	0.0294
0.3711	0.0278
0.373	0.0244
0.375	0.0216
0.377	0.0186
0.3789	0.0166
0.3809	0.0165
0.3828	0.0163
0.3848	0.0152
0.3867	0.0109
0.3887	0.00572
0.3906	0.00277
0.3926	0.00255
0.3945	0.00375
0.3965	0.00334
0.3984	0.0031
0.4004	0.00361
0.4023	0.00513
0.4043	0.0068
0.4063	0.00783
0.4082	0.00929
0.4102	0.0133
0.4121	0.0171
0.4141	0.017
0.416	0.0133
0.418	0.00691
0.4199	0.00288
0.4219	0.00314
0.4238	0.0056
0.4258	0.0077
0.4277	0.00683
0.4297	0.00235
0.4316	-0.00321
0.4336	-0.00753
0.4355	-0.00905
0.4375	-0.00657
0.4395	-0.00124
0.4414	0.00341
0.4434	0.0048
0.4453	0.00334
0.4473	-0.000453
0.4492	-0.00219
0.4512	-0.000567
0.4531	0.00474
0.4551	0.0123
0.457	0.0182
0.459	0.0201
0.4609	0.017
0.4629	0.0124
0.4648	0.0105
0.4668	0.0105
0.4688	0.0108
0.4707	0.0112
0.4727	0.012
0.4746	0.0126
0.4766	0.0122
0.4785	0.0116
0.4805	0.0122
0.4824	0.0166
0.4844	0.0229
0.4863	0.0269
0.4883	0.0256
0.4902	0.0219
0.4922	0.0168
0.4941	0.0113
0.4961	0.00346
0.498	-0.00471
0.5	-0.0106
0.502	-0.0092
0.5039	-0.00281
0.5059	0.0059
0.5078	0.0121
0.5098	0.0149
0.5117	0.0144
0.5137	0.0126
0.5156	0.0113
0.5176	0.0104
0.5195	0.00876
0.5215	0.00459
0.5234	-0.0032
0.5254	-0.0132
0.5273	-0.0198
0.5293	-0.0187
0.5313	-0.0106
0.5332	0.000254
0.5352	0.00768
0.5371	0.0113
0.5391	0.0122
0.541	0.0119
0.543	0.0111
0.5449	0.00886
0.5469	0.00585
0.5488	0.00174
0.5508	0.000848
0.5527	0.00442
0.5547	0.00882
0.5566	0.0143
0.5586	0.0183
0.5605	0.0214
0.5625	0.0246
0.5645	0.0249
0.5664	0.0221
0.5684	0.0155
0.5703	0.00965
0.5723	0.00712
0.5742	0.00638
0.5762	0.00599
0.5781	0.00686
0.5801	0.00833
0.582	0.0109
0.584	0.00995
0.5859	0.00631
0.5879	0.00305
0.5898	0.00144
0.5918	0.00506
0.5938	0.0111
0.5957	0.0154
0.5977	0.0123
0.5996	0.00485
0.6016	-0.0042
0.6035	-0.0103
0.6055	-0.0126
0.6074	-0.0128
0.6094	-0.0107
0.6113	-0.00281
0.6133	0.00801
0.6152	0.0148
0.6172	0.0152
0.6191	0.0125
0.6211	0.012
0.623	0.0135
0.625	0.012
0.627	0.00538
0.6289	-0.00135
0.6309	-0.00119
0.6328	0.0079
0.6348	0.0198
0.6367	0.0258
0.6387	0.0262
0.6406	0.0242
0.6426	0.0215
0.6445	0.0133
0.6465	-0.00296
0.6484	-0.019
0.6504	-0.0206
0.6523	-0.00671
0.6543	0.0114
0.6563	0.0223
0.6582	0.0222
0.6602	0.0182
0.6621	0.0126
0.6641	0.00449
0.666	-0.00988
0.668	-0.0214
0.6699	-0.0218
0.6719	-0.00844
0.6738	0.00603
0.6758	0.0102
0.6777	0.00797
0.6797	0.00533
0.6816	0.00596
0.6836	0.00628
0.6855	0.00472
0.6875	0.00162
0.6895	0.00362
0.6914	0.0134
0.6934	0.0231
0.6953	0.0255
0.6973	0.0194
0.6992	0.0134
0.7012	0.0117
0.7031	0.0123
0.7051	0.0107
0.707	0.00948
0.709	0.01
0.7109	0.0125
0.7129	0.0132
0.7148	0.00687
0.7168	-0.00495
0.7188	-0.0115
0.7207	-0.00484
0.7227	0.00764
0.7246	0.0189
0.7266	0.0202
0.7285	0.0152
0.7305	0.0049
0.7324	-0.00988
0.7344	-0.0261
0.7363	-0.0341
0.7383	-0.0239
0.7402	0.00333
0.7422	0.028
0.7441	0.0358
0.7461	0.0279
0.748	0.0129
0.75	-0.00212
0.752	-0.0145
0.7539	-0.0165
0.7559	-0.00621
0.7578	0.0186
0.7598	0.0434
0.7617	0.0491
0.7637	0.032
0.7656	0.0062
0.7676	-0.0128
0.7695	-0.0205
0.7715	-0.0167
0.7734	-0.00336
0.7754	0.014
0.7773	0.0289
0.7793	0.0326
0.7813	0.0193
0.7832	-0.00351
0.7852	-0.0205
0.7871	-0.0225
0.7891	-0.0115
0.791	0.0023
0.793	0.0105
0.7949	0.0106
0.7969	0.007
0.7988	6.87e-05
0.8008	-0.0086
0.8027	-0.0107
0.8047	9.67e-06
0.8066	0.019
0.8086	0.0349
0.8105	0.0362
0.8125	0.0194
0.8145	-0.00158
0.8164	-0.0117
0.8184	-0.00546
0.8203	0.0102
0.8223	0.0261
0.8242	0.0345
0.8262	0.0274
0.8281	0.0081
0.8301	-0.0187
0.832	-0.0355
0.834	-0.0268
0.8359	0.00425
0.8379	0.038
0.8398	0.049
0.8418	0.0327
0.8438	-0.00349
0.8457	-0.0404
0.8477	-0.0587
0.8496	-0.0486
0.8516	-0.00952
0.8535	0.0382
0.8555	0.0651
0.8574	0.057
0.8594	0.0164
0.8613	-0.0313
0.8633	-0.0534
0.8652	-0.0373
0.8672	0.0066
0.8691	0.0544
0.8711	0.0809
0.873	0.0681
0.875	0.0212
0.877	-0.0332
0.8789	-0.0663
0.8809	-0.0548
0.8828	-0.00447
0.8848	0.0518
0.8867	0.0777
0.8887	0.0579
0.8906	0.00769
0.8926	-0.0426
0.8945	-0.065
0.8965	-0.0496
0.8984	-0.00615
0.9004	0.0395
0.9023	0.058
0.9043	0.039
0.9063	-0.00769
0.9082	-0.0501
0.9102	-0.0532
0.9121	-0.0148
0.9141	0.0373
0.916	0.0681
0.918	0.0597
0.9199	0.0212
0.9219	-0.0209
0.9238	-0.043
0.9258	-0.0348
0.9277	0.00256
0.9297	0.0446
0.9316	0.0604
0.9336	0.0396
0.9355	-0.0107
0.9375	-0.0509
0.9395	-0.0535
0.9414	-0.0179
0.9434	0.0293
0.9453	0.0543
0.9473	0.0444
0.9492	0.00544
0.9512	-0.0393
0.9531	-0.0662
0.9551	-0.0537
0.957	-0.00664
0.959	0.0483
0.9609	0.0763
0.9629	0.0566
0.9648	0.00584
0.9668	-0.0383
0.9688	-0.0465
0.9707	-0.0162
0.9727	0.0295
0.9746	0.0592
0.9766	0.0599
0.9785	0.0327
0.9805	-0.0102
0.9824	-0.043
0.9844	-0.0479
0.9863	-0.0219
0.9883	0.0203
0.9902	0.0506
0.9922	0.0508
0.9941	0.0216
0.9961	-0.0169
0.998	-0.0432
1	-0.0462
1.002	-0.0305
1.0039	0.000166
1.0059	0.031
1.0078	0.0473
1.0098	0.0395
1.0117	0.0126
1.0137	-0.0177
1.0156	-0.0304
1.0176	-0.0193
1.0195	0.00878
1.0215	0.0382
1.0234	0.0521
1.0254	0.044
1.0273	0.0142
1.0293	-0.0241
1.0313	-0.0472
1.0332	-0.0398
1.0352	-0.00345
1.0371	0.04
1.0391	0.0601
1.041	0.043
1.043	-0.00184
1.0449	-0.0461
1.0469	-0.0624
1.0488	-0.043
1.0508	-0.000491
1.0527	0.0423
1.0547	0.0594
1.0566	0.0424
1.0586	0.0027
1.0605	-0.0323
1.0625	-0.0369
1.0645	-0.00797
1.0664	0.0319
1.0684	0.0557
1.0703	0.0494
1.0723	0.0213
1.0742	-0.0122
1.0762	-0.0347
1.0781	-0.0327
1.0801	-0.0132
1.082	0.0146
1.084	0.0362
1.0859	0.0397
1.0879	0.0209
1.0898	-0.00992
1.0918	-0.0373
1.0938	-0.0441
1.0957	-0.0311
1.0977	-0.00322
1.0996	0.0273
1.1016	0.0446
1.1035	0.0411
1.1055	0.014
1.1074	-0.019
1.1094	-0.0364
1.1113	-0.0242
1.1133	0.0132
1.1152	0.0514
1.1172	0.0626
1.1191	0.0403
1.1211	-0.00581
1.123	-0.0432
1.125	-0.0497
1.127	-0.0234
1.1289	0.0196
1.1309	0.0521
1.1328	0.0535
1.1348	0.021
1.1367	-0.0246
1.1387	-0.0544
1.1406	-0.0516
1.1426	-0.0212
1.1445	0.0194
1.1465	0.0457
1.1484	0.049
1.1504	0.0289
1.1523	0.00105
1.1543	-0.0202
1.1563	-0.026
1.1582	-0.0103
1.1602	0.0173
1.1621	0.0407
1.1641	0.0462
1.166	0.0254
1.168	-0.00833
1.1699	-0.0388
1.1719	-0.0449
1.1738	-0.0207
1.1758	0.0191
1.1777	0.0478
1.1797	0.0434
1.1816	0.01
1.1836	-0.0334
1.1855	-0.0614
1.1875	-0.0516
1.1895	-0.00884
1.1914	0.0424
1.1934	0.069
1.1953	0.0536
1.1973	0.011
1.1992	-0.0275
1.2012	-0.0359
1.2031	-0.0139
1.2051	0.0171
1.207	0.0388
1.209	0.0396
1.2109	0.0251
1.2129	0.000981
1.2148	-0.0254
1.2168	-0.0367
1.2188	-0.0237
1.2207	0.00788
1.2227	0.0336
1.2246	0.0362
1.2266	0.013
1.2285	-0.0211
1.2305	-0.0428
1.2324	-0.0419
1.2344	-0.0143
1.2363	0.0265
1.2383	0.0585
1.2402	0.06
1.2422	0.026
1.2441	-0.0204
1.2461	-0.0459
1.248	-0.0349
1.25	0.00275
1.252	0.0371
1.2539	0.0483
1.2559	0.0292
1.2578	-0.00354
1.2598	-0.0271
1.2617	-0.0298
1.2637	-0.0187
1.2656	-0.00306
1.2676	0.0135
1.2695	0.0212
1.2715	0.0166
1.2734	0.000801
1.2754	-0.0168
1.2773	-0.0206
1.2793	-0.00606
1.2813	0.0206
1.2832	0.0414
1.2852	0.0438
1.2871	0.0279
1.2891	-0.00218
1.291	-0.0264
1.293	-0.0336
1.2949	-0.0142
1.2969	0.0171
1.2988	0.0357
1.3008	0.0302
1.3027	0.00734
1.3047	-0.0148
1.3066	-0.0267
1.3086	-0.0248
1.3105	-0.0167
1.3125	-0.00395
1.3145	0.0111
1.3164	0.0231
1.3184	0.0274
1.3203	0.0159
1.3223	-0.00191
1.3242	-0.0148
1.3262	-0.01
1.3281	0.0105
1.3301	0.0297
1.332	0.0324
1.334	0.015
1.3359	-0.00655
1.3379	-0.02
1.3398	-0.0182
1.3418	-0.00223
1.3438	0.0146
1.3457	0.0201
1.3477	0.0106
1.3496	-0.00438
1.3516	-0.0173
1.3535	-0.0209
1.3555	-0.0159
1.3574	-0.00214
1.3594	0.0194
1.3613	0.0375
1.3633	0.0412
1.3652	0.0239
1.3672	-0.00328
1.3691	-0.0264
1.3711	-0.0273
1.373	-0.00835
1.375	0.0192
1.377	0.0342
1.3789	0.0236
1.3809	0.000426
1.3828	-0.0182
1.3848	-0.0224
1.3867	-0.0161
1.3887	-0.00602
1.3906	0.00136
1.3926	0.00658
1.3945	0.0114
1.3965	0.0133
1.3984	0.00865
1.4004	0.00085
1.4023	-0.00168
1.4043	0.00687
1.4063	0.0239
1.4082	0.0298
1.4102	0.017
1.4121	-0.00887
1.4141	-0.0213
1.416	-0.0127
1.418	0.00517
1.4199	0.016
1.4219	0.0141
1.4238	0.00446
1.4258	-0.00554
1.4277	-0.0113
1.4297	-0.0161
1.4316	-0.0165
1.4336	-0.00971
1.4355	0.00852
1.4375	0.0284
1.4395	0.0377
1.4414	0.0257
1.4434	0.00201
1.4453	-0.0176
1.4473	-0.0205
1.4492	-0.0073
1.4512	0.0107
1.4531	0.0231
1.4551	0.0176
1.457	0.00506
1.459	-0.00513
1.4609	-0.0113
1.4629	-0.0161
1.4648	-0.0166
1.4668	-0.0101
1.4688	0.00455
1.4707	0.0183
1.4727	0.0227
1.4746	0.0121
1.4766	-9.81e-05
1.4785	-0.000177
1.4805	0.0119
1.4824	0.0234
1.4844	0.019
1.4863	0.000169
1.4883	-0.0143
1.4902	-0.0083
1.4922	0.00381
1.4941	0.00732
1.4961	0.00241
1.498	-0.00178
1.5	-0.000102
1.502	0.00236
1.5039	-0.00823
1.5059	-0.0212
1.5078	-0.0224
1.5098	0.00122
1.5117	0.0318
1.5137	0.0434
1.5156	0.0244
1.5176	-0.00223
1.5195	-0.015
1.5215	-0.00917
1.5234	-0.00146
1.5254	0.00294
1.5273	0.007
1.5293	0.0138
1.5313	0.0205
1.5332	0.0123
1.5352	-0.0132
1.5371	-0.0323
1.5391	-0.0279
1.541	-0.00193
1.543	0.0192
1.5449	0.0198
1.5469	0.0116
1.5488	0.00893
1.5508	0.0168
1.5527	0.0183
1.5547	0.00569
1.5566	-0.0121
1.5586	-0.0168
1.5605	-0.00317
1.5625	0.0162
1.5645	0.017
1.5664	0.00122
1.5684	-0.0107
1.5703	-0.00914
1.5723	-0.0022
1.5742	-0.00441
1.5762	-0.0132
1.5781	-0.0132
1.5801	0.00456
1.582	0.0266
1.584	0.0292
1.5859	0.0127
1.5879	-0.00111
1.5898	0.00369
1.5918	0.0121
1.5938	0.00387
1.5957	-0.0128
1.5977	-0.0142
1.5996	0.00374
1.6016	0.024
1.6035	0.0192
1.6055	-0.00759
1.6074	-0.0267
1.6094	-0.0203
1.6113	-0.000941
1.6133	0.00623
1.6152	0.000281
1.6172	0.00417
1.6191	0.0249
1.6211	0.0389
1.623	0.0226
1.625	-0.0148
1.627	-0.0363
1.6289	-0.0226
1.6309	0.0116
1.6328	0.0257
1.6348	0.0102
1.6367	-0.00448
1.6387	-0.00271
1.6406	0.00132
1.6426	-0.00971
1.6445	-0.03
1.6465	-0.0271
1.6484	0.00901
1.6504	0.0446
1.6523	0.0444
1.6543	0.0112
1.6563	-0.00954
1.6582	-0.00112
1.6602	0.00843
1.6621	-0.00507
1.6641	-0.0219
1.666	-0.00949
1.668	0.0224
1.6699	0.0364
1.6719	0.00819
1.6738	-0.0318
1.6758	-0.038
1.6777	-0.0108
1.6797	0.0116
1.6816	0.00711
1.6836	-0.00145
1.6855	0.0152
1.6875	0.0393
1.6895	0.0327
1.6914	-0.00796
1.6934	-0.0403
1.6953	-0.0294
1.6973	0.0136
1.6992	0.035
1.7012	0.0156
1.7031	-0.00969
1.7051	-0.0115
1.707	-0.00116
1.709	-0.00535
1.7109	-0.0212
1.7129	-0.0215
1.7148	0.00975
1.7168	0.043
1.7188	0.041
1.7207	0.00984
1.7227	-0.0119
1.7246	-0.00871
1.7266	-0.00224
1.7285	-0.00909
1.7305	-0.0131
1.7324	-0.000294
1.7344	0.0237
1.7363	0.0254
1.7383	-0.00291
1.7402	-0.0327
1.7422	-0.0335
1.7441	-0.00923
1.7461	0.0146
1.748	0.0228
1.75	0.0226
1.752	0.0239
1.7539	0.0202
1.7559	0.00477
1.7578	-0.0182
1.7598	-0.0293
1.7617	-0.0101
1.7637	0.0176
1.7656	0.0298
1.7676	0.0166
1.7695	-0.00826
1.7715	-0.0226
1.7734	-0.0199
1.7754	-0.0115
1.7773	-0.00378
1.7793	0.00855
1.7813	0.0292
1.7832	0.0423
1.7852	0.0294
1.7871	-0.00674
1.7891	-0.0394
1.791	-0.0388
1.793	-0.00459
1.7949	0.0256
1.7969	0.0269
1.7988	0.0104
1.8008	-0.0049
1.8027	-0.0125
1.8047	-0.022
1.8066	-0.0305
1.8086	-0.0181
1.8105	0.0204
1.8125	0.0567
1.8145	0.0544
1.8164	0.0188
1.8184	-0.018
1.8203	-0.0364
1.8223	-0.0312
1.8242	-0.0104
1.8262	0.0113
1.8281	0.0275
1.8301	0.0313
1.832	0.013
1.834	-0.0174
1.8359	-0.0408
1.8379	-0.0401
1.8398	-0.0135
1.8418	0.028
1.8438	0.0559
1.8457	0.0512
1.8477	0.0171
1.8496	-0.0234
1.8516	-0.0451
1.8535	-0.0338
1.8555	-0.00628
1.8574	0.0176
1.8594	0.034
1.8613	0.0296
1.8633	0.00632
1.8652	-0.0284
1.8672	-0.047
1.8691	-0.0314
1.8711	0.0119
1.873	0.0474
1.875	0.0542
1.877	0.0368
1.8789	0.00467
1.8809	-0.034
1.8828	-0.0549
1.8848	-0.0381
1.8867	0.00392
1.8887	0.0409
1.8906	0.0435
1.8926	0.0171
1.8945	-0.0176
1.8965	-0.0421
1.8984	-0.0452
1.9004	-0.0176
1.9023	0.03
1.9043	0.0655
1.9063	0.0616
1.9082	0.0208
1.9102	-0.0302
1.9121	-0.0539
1.9141	-0.0427
1.916	-0.0127
1.918	0.022
1.9199	0.044
1.9219	0.0408
1.9238	0.0101
1.9258	-0.0313
1.9277	-0.0541
1.9297	-0.0347
1.9316	0.0142
1.9336	0.0573
1.9355	0.0648
1.9375	0.0326
1.9395	-0.0193
1.9414	-0.0508
1.9434	-0.0477
1.9453	-0.0216
1.9473	0.0101
1.9492	0.0316
1.9512	0.0393
1.9531	0.0221
1.9551	-0.0167
1.957	-0.0451
1.959	-0.0334
1.9609	0.00997
1.9629	0.0492
1.9648	0.0565
1.9668	0.0288
1.9688	-0.0112
1.9707	-0.0357
1.9727	-0.0394
1.9746	-0.0247
1.9766	0.00178
1.9785	0.027
1.9805	0.0384
1.9824	0.0228
1.9844	-0.0146
1.9863	-0.0408
1.9883	-0.0274
1.9902	0.0134
1.9922	0.0437
1.9941	0.0374
1.9961	0.00686
1.998	-0.0127
2	-0.0162
2.002	-0.0207
2.0039	-0.024
2.0059	-0.0129
2.0078	0.018
2.0098	0.0379
2.0117	0.0224
2.0137	-0.0107
2.0156	-0.0209
2.0176	-0.00279
2.0195	0.0215
2.0215	0.0251
2.0234	0.00548
2.0254	-0.00995
2.0273	-0.00673
2.0293	-0.0023
2.0313	-0.00915
2.0332	-0.0183
2.0352	-0.00885
2.0371	0.0116
2.0391	0.018
2.041	0.00348
2.043	-0.00529
2.0449	0.00669
2.0469	0.023
2.0488	0.0198
2.0508	-0.00524
2.0527	-0.0201
2.0547	-0.00907
2.0566	0.00625
2.0586	0.00805
2.0605	-0.00383
2.0625	-0.00783
2.0645	-0.000616
2.0664	0.00413
2.0684	-0.000722
2.0703	-0.000923
2.0723	0.0123
2.0742	0.0298
2.0762	0.0263
2.0781	-0.00486
2.0801	-0.0335
2.082	-0.0289
2.084	-0.00446
2.0859	0.0133
2.0879	0.0112
2.0898	0.00454
2.0918	0.000576
2.0938	-0.0048
2.0957	-0.00856
2.0977	-0.00214
2.0996	0.0144
2.1016	0.0302
2.1035	0.0286
2.1055	0.00457
2.1074	-0.0183
2.1094	-0.0286
2.1113	-0.02
2.1133	-0.0016
2.1152	0.0131
2.1172	0.0186
2.1191	0.0105
2.1211	-0.00502
2.123	-0.0125
2.125	-0.00365
2.127	0.012
2.1289	0.0192
2.1309	0.00932
2.1328	-0.00389
2.1348	-0.00482
2.1367	-0.0063
2.1387	-0.0121
2.1406	-0.0154
2.1426	-0.00291
2.1445	0.0122
2.1465	0.0134
2.1484	0.00537
2.1504	0.00562
2.1523	0.0132
2.1543	0.0169
2.1563	0.00627
2.1582	-0.014
2.1602	-0.0187
2.1621	-0.00743
2.1641	0.00302
2.166	0.00308
2.168	-0.000188
2.1699	0.00118
2.1719	-0.00144
2.1738	-0.00754
2.1758	-0.00353
2.1777	0.015
2.1797	0.0285
2.1816	0.0223
2.1836	-0.00365
2.1855	-0.0188
2.1875	-0.0167
2.1895	-0.0101
2.1914	-0.00541
2.1934	0.00167
2.1953	0.013
2.1973	0.0151
2.1992	0.00332
2.2012	-0.00655
2.2031	0.000475
2.2051	0.0134
2.207	0.0167
2.209	0.00113
2.2109	-0.0127
2.2129	-0.0117
2.2148	-0.00636
2.2168	-0.00678
2.2188	-0.00629
2.2207	0.00214
2.2227	0.0065
2.2246	0.00455
2.2266	0.00499
2.2285	0.0148
2.2305	0.0194
2.2324	0.00953
2.2344	-0.00959
2.2363	-0.0149
2.2383	-0.00725
2.2402	-0.00266
2.2422	-0.00406
2.2441	-0.000525
2.2461	0.00943
2.248	0.0081
2.25	-0.0056
2.252	-0.0093
2.2539	0.00762
2.2559	0.0257
2.2578	0.0177
2.2598	-0.01
2.2617	-0.0208
2.2637	-0.0107
2.2656	-0.00116
2.2676	-0.00475
2.2695	-0.00501
2.2715	0.00561
2.2734	0.0112
2.2754	0.00898
2.2773	0.00785
2.2793	0.0104
2.2813	0.0127
2.2832	0.00343
2.2852	-0.0103
2.2871	-0.0124
2.2891	-0.00862
2.291	-0.00491
2.293	-0.00154
2.2949	0.00684
2.2969	0.0088
2.2988	-0.00125
2.3008	-0.00575
2.3027	0.00783
2.3047	0.0232
2.3066	0.0185
2.3086	-0.00683
2.3105	-0.0179
2.3125	-0.00929
2.3145	-0.000736
2.3164	-0.00429
2.3184	-0.00626
2.3203	0.00403
2.3223	0.0125
2.3242	0.0104
2.3262	0.0081
2.3281	0.00893
2.3301	0.0106
2.332	0.0014
2.334	-0.0119
2.3359	-0.0143
2.3379	-0.0106
2.3398	-0.00439
2.3418	0.00198
2.3438	0.00982
2.3457	0.00589
2.3477	-0.0049
2.3496	-0.00103
2.3516	0.0173
2.3535	0.0248
2.3555	0.00904
2.3574	-0.0134
2.3594	-0.0136
2.3613	-0.00427
2.3633	-0.00352
2.3652	-0.00807
2.3672	-0.00129
2.3691	0.0121
2.3711	0.0122
2.373	0.00411
2.375	0.0039
2.377	0.0101
2.3789	0.00752
2.3809	-0.00826
2.3828	-0.0135
2.3848	-0.00765
2.3867	-0.00167
2.3887	-0.00281
2.3906	0.00218
2.3926	0.00582
2.3945	0.00125
2.3965	0.00191
2.3984	0.0144
2.4004	0.0237
2.4023	0.0137
2.4043	-0.0106
2.4063	-0.0196
2.4082	-0.012
2.4102	-0.00579
2.4121	-0.00549
2.4141	0.00205
2.416	0.0129
2.418	0.0103
2.4199	0.00304
2.4219	0.00378
2.4238	0.00924
2.4258	0.00596
2.4277	-0.00785
2.4297	-0.00865
2.4316	-0.00272
2.4336	-0.00241
2.4355	-0.0066
2.4375	-0.0014
2.4395	0.00591
2.4414	0.00408
2.4434	0.00706
2.4453	0.0178
2.4473	0.0224
2.4492	0.00647
2.4512	-0.0181
2.4531	-0.0223
2.4551	-0.0121
2.457	-0.00507
2.459	-0.0014
2.4609	0.00951
2.4629	0.0145
2.4648	0.00584
2.4668	0.000919
2.4688	0.00627
2.4707	0.0117
2.4727	0.00166
2.4746	-0.00909
2.4766	-0.00382
2.4785	0.000125
2.4805	-0.00469
2.4824	-0.0082
2.4844	0.000841
2.4863	0.00638
2.4883	0.00573
2.4902	0.0105
2.4922	0.018
2.4941	0.0129
2.4961	-0.00938
2.498	-0.0213
2.5	-0.0144
2.502	-0.0052
2.5039	-0.00266
2.5059	0.0055
2.5078	0.0134
2.5098	0.00804
2.5117	0.00328
2.5137	0.00832
2.5156	0.0129
2.5176	0.00351
2.5195	-0.0116
2.5215	-0.00975
2.5234	-0.00222
2.5254	-0.00488
2.5273	-0.00773
2.5293	0.00148
2.5313	0.00856
2.5332	0.00571
2.5352	0.00766
2.5371	0.015
2.5391	0.0124
2.541	-0.00741
2.543	-0.0172
2.5449	-0.00986
2.5469	-0.00312
2.5488	-0.00526
2.5508	0.000622
2.5527	0.0112
2.5547	0.0102
2.5566	0.00846
2.5586	0.0123
2.5605	0.0136
2.5625	-0.000754
2.5645	-0.0173
2.5664	-0.0147
2.5684	-0.0058
2.5703	-0.00452
2.5723	-0.00183
2.5742	0.0086
2.5762	0.00968
2.5781	0.00381
2.5801	0.00664
2.582	0.0132
2.584	0.00799
2.5859	-0.00972
2.5879	-0.0115
2.5898	-0.00291
2.5918	-0.00244
2.5938	-0.00616
2.5957	0.00117
2.5977	0.00976
2.5996	0.00686
2.6016	0.0085
2.6035	0.014
2.6055	0.0101
2.6074	-0.0097
2.6094	-0.0207
2.6113	-0.0119
2.6133	-0.00347
2.6152	-0.00277
2.6172	0.00419
2.6191	0.0118
2.6211	0.00805
2.623	0.00678
2.625	0.0122
2.627	0.0118
2.6289	-0.00508
2.6309	-0.0158
2.6328	-0.0074
2.6348	-0.00195
2.6367	-0.00617
2.6387	-0.00337
2.6406	0.00893
2.6426	0.00983
2.6445	0.0073
2.6465	0.0109
2.6484	0.0122
2.6504	-0.00367
2.6523	-0.0182
2.6543	-0.012
2.6563	-0.00326
2.6582	-0.00375
2.6602	-0.00137
2.6621	0.00965
2.6641	0.0107
2.666	0.0102
2.668	0.0143
2.6699	0.0136
2.6719	-0.00359
2.6738	-0.02
2.6758	-0.0146
2.6777	-0.0062
2.6797	-0.00607
2.6816	-0.000994
2.6836	0.0118
2.6855	0.0119
2.6875	0.00707
2.6895	0.00882
2.6914	0.0106
2.6934	-0.00315
2.6953	-0.0172
2.6973	-0.00929
2.6992	0.000502
2.7012	-0.00178
2.7031	-0.00297
2.7051	0.00707
2.707	0.00827
2.709	0.00751
2.7109	0.0124
2.7129	0.0133
2.7148	-0.00431
2.7168	-0.0198
2.7188	-0.0138
2.7207	-0.00609
2.7227	-0.00596
2.7246	-0.000526
2.7266	0.0115
2.7285	0.0116
2.7305	0.0109
2.7324	0.0138
2.7344	0.0109
2.7363	-0.00884
2.7383	-0.0205
2.7402	-0.00945
2.7422	-0.00146
2.7441	-0.00395
2.7461	0.000945
2.748	0.0113
2.75	0.0092
2.752	0.0082
2.7539	0.0116
2.7559	0.0065
2.7578	-0.0132
2.7598	-0.0188
2.7617	-0.00631
2.7637	-0.00126
2.7656	-0.00556
2.7676	0.000496
2.7695	0.0105
2.7715	0.0113
2.7734	0.0153
2.7754	0.0173
2.7773	0.00564
2.7793	-0.0176
2.7813	-0.0202
2.7832	-0.00854
2.7852	-0.00677
2.7871	-0.0053
2.7891	0.00832
2.791	0.0153
2.793	0.0119
2.7949	0.0115
2.7969	0.01
2.7988	-0.00571
2.8008	-0.0213
2.8027	-0.0115
2.8047	0.00196
2.8066	-0.000169
2.8086	-0.00261
2.8105	0.00763
2.8125	0.00944
2.8145	0.00891
2.8164	0.0131
2.8184	0.00936
2.8203	-0.0103
2.8223	-0.0202
2.8242	-0.00956
2.8262	-0.00476
2.8281	-0.00714
2.8301	0.000817
2.832	0.0115
2.834	0.0122
2.8359	0.0145
2.8379	0.0162
2.8398	0.00375
2.8418	-0.0193
2.8438	-0.0188
2.8457	-0.00437
2.8477	-0.00307
2.8496	-0.00401
2.8516	0.0083
2.8535	0.0129
2.8555	0.0112
2.8574	0.0134
2.8594	0.00871
2.8613	-0.0123
2.8633	-0.0239
2.8652	-0.0107
2.8672	0.000947
2.8691	-0.00258
2.8711	-1.93e-05
2.873	0.00897
2.875	0.0107
2.877	0.0155
2.8789	0.0177
2.8809	0.00385
2.8828	-0.0205
2.8848	-0.0196
2.8867	-0.00531
2.8887	-0.00531
2.8906	-0.00569
2.8926	0.00706
2.8945	0.0132
2.8965	0.0148
2.8984	0.0168
2.9004	0.00798
2.9023	-0.0164
2.9043	-0.0259
2.9063	-0.00748
2.9082	0.00351
2.9102	-0.000814
2.9121	0.00313
2.9141	0.0105
2.916	0.0113
2.918	0.0156
2.9199	0.0127
2.9219	-0.00782
2.9238	-0.0263
2.9258	-0.0147
2.9277	-0.000475
2.9297	-0.00332
2.9316	-0.00181
2.9336	0.00771
2.9355	0.0108
2.9375	0.0158
2.9395	0.0175
2.9414	0.00307
2.9434	-0.0222
2.9453	-0.0199
2.9473	-0.00183
2.9492	-0.000597
2.9512	-0.0048
2.9531	0.00586
2.9551	0.0121
2.957	0.0155
2.959	0.0189
2.9609	0.00586
2.9629	-0.0227
2.9648	-0.0273
2.9668	-0.00734
2.9688	0.00205
2.9707	-0.00201
2.9727	0.00388
2.9746	0.0105
2.9766	0.0159
2.9785	0.0223
2.9805	0.0131
2.9824	-0.0168
2.9844	-0.0301
2.9863	-0.0101
2.9883	0.00141
2.9902	-0.00288
2.9922	0.00183
2.9941	0.00924
2.9961	0.0132
2.998	0.0199
3	0.0123
3.002	-0.0161
3.0039	-0.0309
3.0059	-0.0105
3.0078	0.00694
3.0098	0.00184
3.0117	0.0012
3.0137	0.00677
3.0156	0.012
3.0176	0.0212
3.0195	0.0162
3.0215	-0.0144
3.0234	-0.034
3.0254	-0.015
3.0273	0.00242
3.0293	0.000146
3.0313	0.000674
3.0332	0.0055
3.0352	0.0124
3.0371	0.0222
3.0391	0.0182
3.041	-0.0131
3.043	-0.0347
3.0449	-0.014
3.0469	0.00722
3.0488	0.00366
3.0508	0.000899
3.0527	0.00511
3.0547	0.0111
3.0566	0.0238
3.0586	0.0172
3.0605	-0.0185
3.0625	-0.0378
3.0645	-0.0155
3.0664	0.00643
3.0684	0.005
3.0703	0.0025
3.0723	0.00303
3.0742	0.0124
3.0762	0.0274
3.0781	0.0194
3.0801	-0.0206
3.082	-0.04
3.084	-0.0125
3.0859	0.00782
3.0879	0.00567
3.0898	0.00365
3.0918	0.00223
3.0938	0.0122
3.0957	0.0277
3.0977	0.012
3.0996	-0.0289
3.1016	-0.0398
3.1035	-0.00722
3.1055	0.0145
3.1074	0.0115
3.1094	0.00509
3.1113	-1.72e-05
3.1133	0.0131
3.1152	0.0293
3.1172	0.0075
3.1191	-0.0369
3.1211	-0.0367
3.123	-0.00326
3.125	0.0135
3.127	0.0115
3.1289	0.00141
3.1309	-0.00284
3.1328	0.0162
3.1348	0.0297
3.1367	-0.000478
3.1387	-0.0408
3.1406	-0.0297
3.1426	0.00582
3.1445	0.018
3.1465	0.0118
3.1484	-0.00169
3.1504	-0.00306
3.1523	0.0231
3.1543	0.0281
3.1563	-0.0143
3.1582	-0.0461
3.1602	-0.0256
3.1621	0.00675
3.1641	0.0198
3.166	0.0133
3.168	-0.00368
3.1699	0.00396
3.1719	0.0308
3.1738	0.0206
3.1758	-0.0296
3.1777	-0.0455
3.1797	-0.0153
3.1816	0.0134
3.1836	0.024
3.1855	0.0117
3.1875	-0.00606
3.1895	0.00893
3.1914	0.0278
3.1934	-0.00089
3.1953	-0.042
3.1973	-0.0364
3.1992	-0.000839
3.2012	0.0255
3.2031	0.0295
3.2051	0.00455
3.207	-0.00798
3.209	0.0152
3.2109	0.02
3.2129	-0.0186
3.2148	-0.0415
3.2168	-0.023
3.2188	0.00631
3.2207	0.0308
3.2227	0.0221
3.2246	-0.0055
3.2266	-0.00291
3.2285	0.0182
3.2305	0.00384
3.2324	-0.029
3.2344	-0.0296
3.2363	-0.0076
3.2383	0.0182
3.2402	0.0315
3.2422	0.00954
3.2441	-0.00723
3.2461	0.00987
3.248	0.0126
3.25	-0.0168
3.252	-0.0318
3.2539	-0.0228
3.2559	-0.000631
3.2578	0.0284
3.2598	0.0267
3.2617	0.00396
3.2637	0.00283
3.2656	0.0117
3.2676	-0.00756
3.2695	-0.0271
3.2715	-0.0225
3.2734	-0.0119
3.2754	0.0144
3.2773	0.032
3.2793	0.015
3.2813	0.00427
3.2832	0.00471
3.2852	-0.0115
3.2871	-0.0279
3.2891	-0.0211
3.291	-0.00837
3.293	0.00924
3.2949	0.0297
3.2969	0.0226
3.2988	0.00802
3.3008	0.00571
3.3027	-0.00922
3.3047	-0.032
3.3066	-0.0228
3.3086	-0.00745
3.3105	0.00553
3.3125	0.0241
3.3145	0.021
3.3164	0.00865
3.3184	0.00634
3.3203	-0.00629
3.3223	-0.0303
3.3242	-0.0247
3.3262	-0.0021
3.3281	0.00925
3.3301	0.0212
3.332	0.0186
3.334	0.00454
3.3359	0.00944
3.3379	0.00163
3.3398	-0.0281
3.3418	-0.0317
3.3438	-0.01
3.3457	0.00583
3.3477	0.0218
3.3496	0.0195
3.3516	0.00582
3.3535	0.00893
3.3555	0.00797
3.3574	-0.0205
3.3594	-0.0322
3.3613	-0.0142
3.3633	0.00178
3.3652	0.0213
3.3672	0.0245
3.3691	0.00702
3.3711	0.00818
3.373	0.00437
3.375	-0.024
3.377	-0.0358
3.3789	-0.0177
3.3809	0.00262
3.3828	0.0261
3.3848	0.0319
3.3867	0.013
3.3887	0.00615
3.3906	0.00116
3.3926	-0.0286
3.3945	-0.037
3.3965	-0.0167
3.3984	0.00199
3.4004	0.0282
3.4023	0.0334
3.4043	0.014
3.4063	0.00429
3.4082	-0.00836
3.4102	-0.0357
3.4121	-0.0358
3.4141	-0.00739
3.416	0.0123
3.418	0.0317
3.4199	0.0317
3.4219	0.0104
3.4238	0.00423
3.4258	-0.0113
3.4277	-0.0419
3.4297	-0.0359
3.4316	-0.00693
3.4336	0.0157
3.4355	0.0353
3.4375	0.0278
3.4395	0.00764
3.4414	0.00184
3.4434	-0.0133
3.4453	-0.0418
3.4473	-0.0308
3.4492	-0.000788
3.4512	0.0193
3.4531	0.0379
3.4551	0.0242
3.457	0.0042
3.459	0.000887
3.4609	-0.0236
3.4629	-0.0472
3.4648	-0.0286
3.4668	0.0019
3.4688	0.0276
3.4707	0.0431
3.4727	0.0246
3.4746	0.00552
3.4766	-0.00269
3.4785	-0.033
3.4805	-0.05
3.4824	-0.0229
3.4844	0.0051
3.4863	0.0353
3.4883	0.0446
3.4902	0.0209
3.4922	0.00498
3.4941	-0.0137
3.4961	-0.0487
3.498	-0.0494
3.5	-0.0118
3.502	0.0199
3.5039	0.0465
3.5059	0.0434
3.5078	0.0155
3.5098	0.00218
3.5117	-0.0264
3.5137	-0.0609
3.5156	-0.0447
3.5176	-0.00594
3.5195	0.0321
3.5215	0.0553
3.5234	0.0374
3.5254	0.0107
3.5273	-0.00694
3.5293	-0.0424
3.5313	-0.0619
3.5332	-0.0292
3.5352	0.00958
3.5371	0.0468
3.5391	0.0574
3.541	0.0267
3.543	0.00506
3.5449	-0.0233
3.5469	-0.0628
3.5488	-0.0572
3.5508	-0.0159
3.5527	0.0291
3.5547	0.0635
3.5566	0.0532
3.5586	0.0194
3.5605	-0.00468
3.5625	-0.0443
3.5645	-0.0718
3.5664	-0.0423
3.5684	0.00151
3.5703	0.0495
3.5723	0.0693
3.5742	0.0397
3.5762	0.00891
3.5781	-0.0264
3.5801	-0.0691
3.582	-0.0655
3.584	-0.0194
3.5859	0.0304
3.5879	0.0715
3.5898	0.0634
3.5918	0.0241
3.5938	-0.00613
3.5957	-0.0541
3.5977	-0.0795
3.5996	-0.0471
3.6016	0.00172
3.6035	0.0577
3.6055	0.0766
3.6074	0.0453
3.6094	0.0081
3.6113	-0.0339
3.6133	-0.0782
3.6152	-0.0656
3.6172	-0.0163
3.6191	0.0346
3.6211	0.0777
3.623	0.0637
3.625	0.0255
3.627	-0.015
3.6289	-0.0714
3.6309	-0.0844
3.6328	-0.0416
3.6348	0.0159
3.6367	0.0714
3.6387	0.0805
3.6406	0.0436
3.6426	0.00285
3.6445	-0.0522
3.6465	-0.0918
3.6484	-0.062
3.6504	-0.00779
3.6523	0.0552
3.6543	0.0882
3.6563	0.0607
3.6582	0.0189
3.6602	-0.0377
3.6621	-0.0926
3.6641	-0.0821
3.666	-0.0239
3.668	0.0414
3.6699	0.0906
3.6719	0.0785
3.6738	0.0345
3.6758	-0.017
3.6777	-0.0855
3.6797	-0.0981
3.6816	-0.0476
3.6836	0.0206
3.6855	0.0868
3.6875	0.091
3.6895	0.0488
3.6914	-0.00454
3.6934	-0.073
3.6953	-0.105
3.6973	-0.0611
3.6992	0.00587
3.7012	0.0769
3.7031	0.101
3.7051	0.0618
3.707	0.0108
3.709	-0.0635
3.7109	-0.113
3.7129	-0.082
3.7148	-0.0116
3.7168	0.0704
3.7188	0.11
3.7207	0.0794
3.7227	0.0223
3.7246	-0.0515
3.7266	-0.116
3.7285	-0.0956
3.7305	-0.0277
3.7324	0.0567
3.7344	0.114
3.7363	0.0925
3.7383	0.0364
3.7402	-0.0447
3.7422	-0.12
3.7441	-0.112
3.7461	-0.0385
3.748	0.0525
3.75	0.12
3.752	0.107
3.7539	0.0483
3.7559	-0.0327
3.7578	-0.122
3.7598	-0.125
3.7617	-0.056
3.7637	0.0417
3.7656	0.122
3.7676	0.119
3.7695	0.0605
3.7715	-0.0287
3.7734	-0.124
3.7754	-0.135
3.7773	-0.0624
3.7793	0.0372
3.7813	0.126
3.7832	0.128
3.7852	0.0711
3.7871	-0.0212
3.7891	-0.129
3.791	-0.15
3.793	-0.079
3.7949	0.0343
3.7969	0.134
3.7988	0.143
3.8008	0.08
3.8027	-0.0197
3.8047	-0.134
3.8066	-0.159
3.8086	-0.0854
3.8105	0.0293
3.8125	0.139
3.8145	0.152
3.8164	0.0916
3.8184	-0.0207
3.8203	-0.145
3.8223	-0.173
3.8242	-0.0927
3.8262	0.0369
3.8281	0.151
3.8301	0.165
3.832	0.0967
3.834	-0.0214
3.8359	-0.156
3.8379	-0.182
3.8398	-0.101
3.8418	0.0385
3.8438	0.161
3.8457	0.174
3.8477	0.102
3.8496	-0.0319
3.8516	-0.169
3.8535	-0.19
3.8555	-0.0958
3.8574	0.0512
3.8594	0.175
3.8613	0.181
3.8633	0.104
3.8652	-0.0434
3.8672	-0.188
3.8691	-0.202
3.8711	-0.0989
3.873	0.0689
3.875	0.193
3.877	0.193
3.8789	0.0986
3.8809	-0.0633
3.8828	-0.206
3.8848	-0.205
3.8867	-0.0906
3.8887	0.0856
3.8906	0.206
3.8926	0.199
3.8945	0.0953
3.8965	-0.0906
3.8984	-0.229
3.9004	-0.214
3.9023	-0.0732
[truncated: 2,098 more rows]
