# Supplementary material for: Effect of the Supports’ Positions on the Vibration Characteristics of a Flexible Rotor Shafting
Source: Hindawi journal article supplement (doi:10.1155/2020/1592794), 2020-02-12
Supplement: f1 [file 1592794.f1.zip › 1592794.f1/test_data/Table10_4.xlsx]

## Sheet: Sheet1
Time t/s	vibration deformation amount u/mm
0	-0.000658
0.002	-0.00122
0.0039	-0.00134
0.0059	-0.00114
0.0078	-0.00146
0.0098	-0.00151
0.0117	-0.00147
0.0137	-0.00127
0.0156	-0.00126
0.0176	-0.00193
0.0195	-0.00219
0.0215	-0.0017
0.0234	-0.00206
0.0254	-0.00197
0.0273	-0.00206
0.0293	-0.0017
0.0313	-0.00147
0.0332	-0.00135
0.0352	-0.00156
0.0371	-0.00195
0.0391	-0.00172
0.041	-0.00133
0.043	-0.000707
0.0449	-0.00121
0.0469	-0.00108
0.0488	-0.00161
0.0508	-0.00151
0.0527	-0.0022
0.0547	-0.00204
0.0566	-0.00291
0.0586	-0.00258
0.0605	-0.00227
0.0625	-0.00232
0.0645	-0.00273
0.0664	-0.0039
0.0684	-0.00381
0.0703	-0.00381
0.0723	-0.00352
0.0742	-0.00261
0.0762	-0.00286
0.0781	-0.0032
0.0801	-0.00364
0.082	-0.00391
0.084	-0.00451
0.0859	-0.00431
0.0879	-0.00436
0.0898	-0.00459
0.0918	-0.00454
0.0938	-0.00431
0.0957	-0.00498
0.0977	-0.00571
0.0996	-0.00561
0.1016	-0.00622
0.1035	-0.00628
0.1055	-0.00583
0.1074	-0.00559
0.1094	-0.00536
0.1113	-0.00609
0.1133	-0.00613
0.1152	-0.00682
0.1172	-0.0073
0.1191	-0.00767
0.1211	-0.00722
0.123	-0.00706
0.125	-0.00737
0.127	-0.00775
0.1289	-0.008
0.1309	-0.00859
0.1328	-0.00941
0.1348	-0.00999
0.1367	-0.00971
0.1387	-0.00943
0.1406	-0.00959
0.1426	-0.00987
0.1445	-0.0105
0.1465	-0.0113
0.1484	-0.0116
0.1504	-0.0119
0.1523	-0.0122
0.1543	-0.012
0.1563	-0.0124
0.1582	-0.013
0.1602	-0.014
0.1621	-0.0145
0.1641	-0.015
0.166	-0.0158
0.168	-0.0162
0.1699	-0.0166
0.1719	-0.0171
0.1738	-0.0175
0.1758	-0.0183
0.1777	-0.0191
0.1797	-0.0197
0.1816	-0.0208
0.1836	-0.0218
0.1855	-0.0222
0.1875	-0.0225
0.1895	-0.0228
0.1914	-0.0233
0.1934	-0.0248
0.1953	-0.0263
0.1973	-0.0274
0.1992	-0.0281
0.2012	-0.028
0.2031	-0.0283
0.2051	-0.0287
0.207	-0.0288
0.209	-0.0288
0.2109	-0.028
0.2129	-0.0264
0.2148	-0.027
0.2168	-0.0298
0.2188	-0.0331
0.2207	-0.0332
0.2227	-0.0298
0.2246	-0.026
0.2266	-0.0239
0.2285	-0.0244
0.2305	-0.0273
0.2324	-0.028
0.2344	-0.0278
0.2363	-0.0263
0.2383	-0.0249
0.2402	-0.023
0.2422	-0.0201
0.2441	-0.0178
0.2461	-0.0189
0.248	-0.0208
0.25	-0.0214
0.252	-0.0198
0.2539	-0.0159
0.2559	-0.0124
0.2578	-0.0105
0.2598	-0.011
0.2617	-0.0119
0.2637	-0.0115
0.2656	-0.012
0.2676	-0.0115
0.2695	-0.00983
0.2715	-0.0076
0.2734	-0.0034
0.2754	-0.00239
0.2773	-0.00349
0.2793	-0.00568
0.2813	-0.00598
0.2832	-0.00449
0.2852	-0.00301
0.2871	-0.00124
0.2891	-0.000713
0.291	-0.00071
0.293	0.000503
0.2949	0.000875
0.2969	-0.000713
0.2988	-0.00323
0.3008	-0.00511
0.3027	-0.00355
0.3047	-0.00155
0.3066	-0.000368
0.3086	-0.00229
0.3105	-0.00448
0.3125	-0.00489
0.3145	-0.00426
0.3164	-0.00315
0.3184	-0.00333
0.3203	-0.00356
0.3223	-0.00213
0.3242	-0.000261
0.3262	0.00127
0.3281	0.00119
0.3301	0.00123
0.332	0.0019
0.334	0.00362
0.3359	0.00557
0.3379	0.00801
0.3398	0.0107
0.3418	0.013
0.3438	0.0146
0.3457	0.0142
0.3477	0.0132
0.3496	0.0143
0.3516	0.0175
0.3535	0.021
0.3555	0.0224
0.3574	0.0215
0.3594	0.0192
0.3613	0.0167
0.3633	0.0146
0.3652	0.0122
0.3672	0.0102
0.3691	0.00933
0.3711	0.0093
0.373	0.00826
0.375	0.00663
0.377	0.00379
0.3789	0.00104
0.3809	-0.000452
0.3828	-0.00038
0.3848	-0.000776
0.3867	-0.000434
0.3887	0.00113
0.3906	0.00176
0.3926	0.00148
0.3945	-0.000248
0.3965	-0.00262
0.3984	-0.00332
0.4004	-0.00193
0.4023	-0.000404
0.4043	-0.000236
0.4063	-0.00198
0.4082	-0.00336
0.4102	-0.00414
0.4121	-0.00439
0.4141	-0.00587
0.416	-0.00834
0.418	-0.0104
0.4199	-0.0128
0.4219	-0.0156
0.4238	-0.0195
0.4258	-0.0235
0.4277	-0.0262
0.4297	-0.0254
0.4316	-0.0232
0.4336	-0.0218
0.4355	-0.0215
0.4375	-0.0233
0.4395	-0.0263
0.4414	-0.0283
0.4434	-0.0286
0.4453	-0.025
0.4473	-0.0185
0.4492	-0.0126
0.4512	-0.0083
0.4531	-0.00664
0.4551	-0.00792
0.457	-0.00933
0.459	-0.00978
0.4609	-0.00789
0.4629	-0.00445
0.4648	-0.000467
0.4668	0.00177
0.4688	0.00173
0.4707	-0.000431
0.4727	-0.00342
0.4746	-0.00615
0.4766	-0.00688
0.4785	-0.00504
0.4805	-0.000522
0.4824	0.00561
0.4844	0.0109
0.4863	0.0132
0.4883	0.0135
0.4902	0.0143
0.4922	0.0147
0.4941	0.0169
0.4961	0.0181
0.498	0.0179
0.5	0.0171
0.502	0.0172
0.5039	0.0172
0.5059	0.0146
0.5078	0.00848
0.5098	0.00124
0.5117	-0.00194
0.5137	-0.000999
0.5156	0.00115
0.5176	0.000825
0.5195	-0.0015
0.5215	-0.00351
0.5234	-0.00382
0.5254	-0.00324
0.5273	-0.00503
0.5293	-0.00722
0.5313	-0.00701
0.5332	-0.00456
0.5352	-0.00427
0.5371	-0.00877
0.5391	-0.0173
0.541	-0.0247
0.543	-0.0299
0.5449	-0.0317
0.5469	-0.0308
0.5488	-0.0275
0.5508	-0.0241
0.5527	-0.0213
0.5547	-0.0208
0.5566	-0.0209
0.5586	-0.0187
0.5605	-0.0148
0.5625	-0.00809
0.5645	-0.0015
0.5664	0.00326
0.5684	0.00376
0.5703	0.00136
0.5723	-0.00228
0.5742	-0.0056
0.5762	-0.00878
0.5781	-0.00898
0.5801	-0.00573
0.582	0.000895
0.584	0.00827
0.5859	0.0137
0.5879	0.0162
0.5898	0.0165
0.5918	0.0156
0.5938	0.016
0.5957	0.0153
0.5977	0.015
0.5996	0.0137
0.6016	0.011
0.6035	0.00743
0.6055	0.00384
0.6074	0.00117
0.6094	-0.000176
0.6113	0.000348
0.6133	0.00149
0.6152	0.00129
0.6172	-0.000558
0.6191	-0.00275
0.6211	-0.00487
0.623	-0.00756
0.625	-0.011
0.627	-0.0151
0.6289	-0.0193
0.6309	-0.0234
0.6328	-0.0267
0.6348	-0.028
0.6367	-0.0258
0.6387	-0.0216
0.6406	-0.0194
0.6426	-0.0193
0.6445	-0.0209
0.6465	-0.0212
0.6484	-0.0159
0.6504	-0.00838
0.6523	-0.00145
0.6543	0.00158
0.6563	0.000884
0.6582	0.000515
0.6602	-0.00109
0.6621	-0.00272
0.6641	-0.00334
0.666	-0.00284
0.668	0.00152
0.6699	0.0103
0.6719	0.0212
0.6738	0.0254
0.6758	0.0233
0.6777	0.019
0.6797	0.0162
0.6816	0.0135
0.6836	0.00779
0.6855	0.00102
0.6875	-0.00388
0.6895	-0.00213
0.6914	0.00167
0.6934	0.00202
0.6953	-0.00226
0.6973	-0.00663
0.6992	-0.00797
0.7012	-0.00703
0.7031	-0.00744
0.7051	-0.0115
0.707	-0.019
0.709	-0.0264
0.7109	-0.0325
0.7129	-0.0342
0.7148	-0.0306
0.7168	-0.0228
0.7188	-0.0148
0.7207	-0.0101
0.7227	-0.00878
0.7246	-0.00776
0.7266	-0.0069
0.7285	-0.00391
0.7305	-0.00245
0.7324	-0.00173
0.7344	-0.00211
0.7363	-0.00182
0.7383	0.00102
0.7402	0.00366
0.7422	0.00768
0.7441	0.0122
0.7461	0.0183
0.748	0.0226
0.75	0.0226
0.752	0.0186
0.7539	0.0113
0.7559	0.00422
0.7578	0.00281
0.7598	0.00316
0.7617	0.00379
0.7637	0.00146
0.7656	-0.000987
0.7676	-0.00235
0.7695	-0.00401
0.7715	-0.00894
0.7734	-0.0158
0.7754	-0.0207
0.7773	-0.0236
0.7793	-0.0265
0.7813	-0.0289
0.7832	-0.0278
0.7852	-0.0233
0.7871	-0.0181
0.7891	-0.0148
0.791	-0.0143
0.793	-0.0127
0.7949	-0.00725
0.7969	0.000486
0.7988	0.00642
0.8008	0.00498
0.8027	-0.000118
0.8047	-0.00236
0.8066	-0.000689
0.8086	0.00348
0.8105	0.0101
0.8125	0.0178
0.8145	0.0256
0.8164	0.0301
0.8184	0.0269
0.8203	0.0132
0.8223	-0.00439
0.8242	-0.0128
0.8262	-0.00948
0.8281	-0.00224
0.8301	0.00385
0.832	0.00549
0.834	0.00518
0.8359	-0.000575
0.8379	-0.0126
0.8398	-0.0281
0.8418	-0.0423
0.8438	-0.0454
0.8457	-0.033
0.8477	-0.015
0.8496	-0.00356
0.8516	-0.00177
0.8535	-0.00632
0.8555	-0.012
0.8574	-0.0141
0.8594	-0.0146
0.8613	-0.0105
0.8633	-0.00185
0.8652	0.00799
0.8672	0.0154
0.8691	0.0164
0.8711	0.014
0.873	0.0133
0.875	0.0128
0.877	0.0131
0.8789	0.0147
0.8809	0.0169
0.8828	0.018
0.8848	0.0145
0.8867	0.00492
0.8887	-0.00838
0.8906	-0.0163
0.8926	-0.0161
0.8945	-0.0102
0.8965	-0.00715
0.8984	-0.00683
0.9004	-0.0112
0.9023	-0.0237
0.9043	-0.0358
0.9063	-0.0396
0.9082	-0.0332
0.9102	-0.0193
0.9121	-0.00687
0.9141	-0.00039
0.916	0.00202
0.918	0.00299
0.9199	0.00218
0.9219	-0.00154
0.9238	-0.00574
0.9258	-0.00476
0.9277	0.00143
0.9297	0.014
0.9316	0.0255
0.9336	0.0301
0.9355	0.026
0.9375	0.0153
0.9395	0.00349
0.9414	-0.00396
0.9434	-0.00536
0.9453	-0.0029
0.9473	0.000349
0.9492	0.00419
0.9512	0.00298
0.9531	-0.00829
0.9551	-0.0241
0.957	-0.0378
0.959	-0.0426
0.9609	-0.0327
0.9629	-0.0187
0.9648	-0.00896
0.9668	-0.00513
0.9688	-0.00555
0.9707	-0.00666
0.9727	-0.00888
0.9746	-0.0108
0.9766	-0.00822
0.9785	0.00185
0.9805	0.0142
0.9824	0.0204
0.9844	0.023
0.9863	0.0184
0.9883	0.0135
0.9902	0.0121
0.9922	0.0124
0.9941	0.0119
0.9961	0.0084
0.998	0.00289
1	-0.00403
1.002	-0.00926
1.0039	-0.0137
1.0059	-0.017
1.0078	-0.0175
1.0098	-0.0162
1.0117	-0.022
1.0137	-0.0293
1.0156	-0.034
1.0176	-0.028
1.0195	-0.0123
1.0215	0.00119
1.0234	0.00247
1.0254	-0.00349
1.0273	-0.0051
1.0293	-0.000732
1.0313	0.00572
1.0332	0.00739
1.0352	0.00572
1.0371	0.0113
1.0391	0.0202
1.041	0.0265
1.043	0.0239
1.0449	0.0122
1.0469	0.00289
1.0488	8.73e-05
1.0508	0.00102
1.0527	-0.00195
1.0547	-0.00893
1.0566	-0.0153
1.0586	-0.0171
1.0605	-0.0171
1.0625	-0.0243
1.0645	-0.0321
1.0664	-0.0322
1.0684	-0.0228
1.0703	-0.00993
1.0723	-0.00505
1.0742	-0.00674
1.0762	-0.00749
1.0781	-0.00232
1.0801	0.00732
1.082	0.0127
1.084	0.00929
1.0859	0.00577
1.0879	0.00933
1.0898	0.0183
1.0918	0.0249
1.0938	0.0218
1.0957	0.0116
1.0977	0.00496
1.0996	0.00103
1.1016	-0.00428
1.1035	-0.0116
1.1055	-0.0171
1.1074	-0.0172
1.1094	-0.0138
1.1113	-0.0185
1.1133	-0.0283
1.1152	-0.0338
1.1172	-0.0278
1.1191	-0.0101
1.1211	0.00283
1.123	0.00273
1.125	-0.00626
1.127	-0.00884
1.1289	-0.000953
1.1309	0.011
1.1328	0.0147
1.1348	0.0146
1.1367	0.0161
1.1387	0.0204
1.1406	0.0237
1.1426	0.0184
1.1445	0.0081
1.1465	0.00125
1.1484	-0.00161
1.1504	-0.00331
1.1523	-0.00898
1.1543	-0.0202
1.1563	-0.0263
1.1582	-0.0255
1.1602	-0.024
1.1621	-0.0232
1.1641	-0.025
1.166	-0.022
1.168	-0.0103
1.1699	0.000577
1.1719	0.00312
1.1738	7.52e-06
1.1758	-0.00116
1.1777	0.00632
1.1797	0.0126
1.1816	0.0159
1.1836	0.0148
1.1855	0.0157
1.1875	0.0202
1.1895	0.0206
1.1914	0.0133
1.1934	0.00164
1.1953	-0.00744
1.1973	-0.00924
1.1992	-0.00881
1.2012	-0.0155
1.2031	-0.0244
1.2051	-0.0333
1.207	-0.0318
1.209	-0.0222
1.2109	-0.0134
1.2129	-0.00756
1.2148	-0.00519
1.2168	-0.00397
1.2188	-0.00428
1.2207	-0.00413
1.2227	0.00208
1.2246	0.0117
1.2266	0.021
1.2285	0.026
1.2305	0.0223
1.2324	0.0171
1.2344	0.0117
1.2363	0.00984
1.2383	0.006
1.2402	-0.00239
1.2422	-0.0113
1.2441	-0.0182
1.2461	-0.0215
1.248	-0.0218
1.25	-0.0258
1.252	-0.0288
1.2539	-0.0285
1.2559	-0.0197
1.2578	-0.00469
1.2598	0.00506
1.2617	0.0032
1.2637	-0.00529
1.2656	-0.00553
1.2676	0.00518
1.2695	0.016
1.2715	0.0211
1.2734	0.0181
1.2754	0.0159
1.2773	0.0183
1.2793	0.0193
1.2813	0.0124
1.2832	-0.001
1.2852	-0.0112
1.2871	-0.0132
1.2891	-0.0161
1.291	-0.0236
1.293	-0.0357
1.2949	-0.0381
1.2969	-0.0258
1.2988	-0.0103
1.3008	-6.73e-05
1.3027	-0.00108
1.3047	-0.00618
1.3066	-0.00773
1.3086	1.36e-05
1.3105	0.011
1.3125	0.0153
1.3145	0.0163
1.3164	0.0181
1.3184	0.0223
1.3203	0.0234
1.3223	0.0152
1.3242	0.00239
1.3262	-0.00739
1.3281	-0.0107
1.3301	-0.0132
1.332	-0.02
1.334	-0.0286
1.3359	-0.0342
1.3379	-0.0301
1.3398	-0.0207
1.3418	-0.00939
1.3438	0.00029
1.3457	0.00388
1.3477	0.000198
1.3496	-0.00433
1.3516	-0.000875
1.3535	0.00888
1.3555	0.02
1.3574	0.0243
1.3594	0.0224
1.3613	0.0189
1.3633	0.0162
1.3652	0.0127
1.3672	0.00235
1.3691	-0.011
1.3711	-0.0223
1.373	-0.0292
1.375	-0.0307
1.377	-0.0309
1.3789	-0.026
1.3809	-0.0206
1.3828	-0.0123
1.3848	-0.00198
1.3867	0.00331
1.3887	0.00118
1.3906	-0.00232
1.3926	0.00245
1.3945	0.0122
1.3965	0.0211
1.3984	0.0219
1.4004	0.0195
1.4023	0.0171
1.4043	0.0156
1.4063	0.0103
1.4082	-0.00195
1.4102	-0.0129
1.4121	-0.0227
1.4141	-0.0288
1.416	-0.0345
1.418	-0.0348
1.4199	-0.0266
1.4219	-0.0139
1.4238	0.000599
1.4258	0.00768
1.4277	0.00351
1.4297	-0.00742
1.4316	-0.00731
1.4336	0.00502
1.4355	0.0228
1.4375	0.0306
1.4395	0.0267
1.4414	0.0179
1.4434	0.0145
1.4453	0.0128
1.4473	0.000566
1.4492	-0.0173
1.4512	-0.0341
1.4531	-0.036
1.4551	-0.0298
1.457	-0.022
1.459	-0.02
1.4609	-0.0196
1.4629	-0.00872
1.4648	0.00713
1.4668	0.0102
1.4688	-0.000243
1.4707	-0.00624
1.4727	0.00213
1.4746	0.0209
1.4766	0.0307
1.4785	0.0261
1.4805	0.0148
1.4824	0.011
1.4844	0.0114
1.4863	0.00452
1.4883	-0.013
1.4902	-0.0345
1.4922	-0.0443
1.4941	-0.0406
1.4961	-0.0241
1.498	-0.0122
1.5	-0.00675
1.502	-0.0018
1.5039	0.00377
1.5059	0.003
1.5078	0.000487
1.5098	0.00102
1.5117	0.00963
1.5137	0.0218
1.5156	0.0288
1.5176	0.027
1.5195	0.0175
1.5215	0.00771
1.5234	-0.00168
1.5254	-0.013
1.5273	-0.0289
1.5293	-0.0415
1.5313	-0.043
1.5332	-0.0297
1.5352	-0.0135
1.5371	-0.00253
1.5391	0.00483
1.541	0.00734
1.543	0.00257
1.5449	-0.00153
1.5469	-0.00127
1.5488	0.00894
1.5508	0.0212
1.5527	0.0284
1.5547	0.0284
1.5566	0.0226
1.5586	0.0129
1.5605	-0.000829
1.5625	-0.019
1.5645	-0.0377
1.5664	-0.049
1.5684	-0.0459
1.5703	-0.0267
1.5723	-0.00872
1.5742	0.00284
1.5762	0.00731
1.5781	0.00684
1.5801	0.00504
1.582	0.00497
1.584	0.00545
1.5859	0.00924
1.5879	0.0147
1.5898	0.0238
1.5918	0.0286
1.5938	0.0244
1.5957	0.00802
1.5977	-0.0109
1.5996	-0.0291
1.6016	-0.0433
1.6035	-0.0511
1.6055	-0.0421
1.6074	-0.0213
1.6094	0.00193
1.6113	0.0174
1.6133	0.0166
1.6152	0.00297
1.6172	-0.00653
1.6191	-0.00297
1.6211	0.0111
1.623	0.0225
1.625	0.0266
1.627	0.0264
1.6289	0.0262
1.6309	0.0168
1.6328	-0.00531
1.6348	-0.0367
1.6367	-0.0595
1.6387	-0.0597
1.6406	-0.0366
1.6426	-0.00973
1.6445	0.00429
1.6465	0.0114
1.6484	0.0131
1.6504	0.0108
1.6523	0.00704
1.6543	0.0013
1.6563	0.000576
1.6582	0.00769
1.6602	0.023
1.6621	0.0351
1.6641	0.0319
1.666	0.0132
1.668	-0.0111
1.6699	-0.0359
1.6719	-0.0545
1.6738	-0.0613
1.6758	-0.0459
1.6777	-0.0171
1.6797	0.0116
1.6816	0.0274
1.6836	0.0212
1.6855	0.00762
1.6875	-0.000369
1.6895	0.00132
1.6914	0.00716
1.6934	0.0112
1.6953	0.0188
1.6973	0.0305
1.6992	0.0323
1.7012	0.0145
1.7031	-0.0232
1.7051	-0.0601
1.707	-0.0744
1.709	-0.0553
1.7109	-0.0218
1.7129	0.00479
1.7148	0.0211
1.7168	0.0256
1.7188	0.0206
1.7207	0.0112
1.7227	0.000397
1.7246	-0.00576
1.7266	-0.000484
1.7285	0.0178
1.7305	0.0366
1.7324	0.0387
1.7344	0.0192
1.7363	-0.017
1.7383	-0.0536
1.7402	-0.0743
1.7422	-0.0645
1.7441	-0.0341
1.7461	-0.000368
1.748	0.0238
1.75	0.0306
1.752	0.0263
1.7539	0.017
1.7559	0.00648
1.7578	-0.00355
1.7598	-0.00422
1.7617	0.00708
1.7637	0.0266
1.7656	0.0353
1.7676	0.0226
1.7695	-0.0114
1.7715	-0.0529
1.7734	-0.0761
1.7754	-0.0644
1.7773	-0.0318
1.7793	0.00382
1.7813	0.0266
1.7832	0.031
1.7852	0.0256
1.7871	0.0182
1.7891	0.0094
1.791	-2.72e-05
1.793	-0.00397
1.7949	0.00695
1.7969	0.0256
1.7988	0.0328
1.8008	0.0135
1.8027	-0.0291
1.8047	-0.0682
1.8066	-0.0745
1.8086	-0.0476
1.8105	-0.0108
1.8125	0.0163
1.8145	0.0249
1.8164	0.026
1.8184	0.0277
1.8203	0.0241
1.8223	0.00781
1.8242	-0.00827
1.8262	-0.00616
1.8281	0.0142
1.8301	0.0325
1.832	0.0251
1.834	-0.011
1.8359	-0.0549
1.8379	-0.0736
1.8398	-0.0555
1.8418	-0.0237
1.8438	0.00563
1.8457	0.0198
1.8477	0.0277
1.8496	0.0333
1.8516	0.0309
1.8535	0.0154
1.8555	-0.00503
1.8574	-0.0095
1.8594	0.00505
1.8613	0.0231
1.8633	0.0211
1.8652	-0.00941
1.8672	-0.0497
1.8691	-0.067
1.8711	-0.052
1.873	-0.0221
1.875	0.00507
1.877	0.0203
1.8789	0.0288
1.8809	0.0351
1.8828	0.0338
1.8848	0.0172
1.8867	-0.00404
1.8887	-0.00973
1.8906	0.00293
1.8926	0.0193
1.8945	0.0163
1.8965	-0.0143
1.8984	-0.0529
1.9004	-0.0642
1.9023	-0.0462
1.9043	-0.0153
1.9063	0.00695
1.9082	0.017
1.9102	0.0291
1.9121	0.0416
1.9141	0.0401
1.916	0.0182
1.918	-0.00745
1.9199	-0.0149
1.9219	-0.00226
1.9238	0.012
1.9258	0.00423
1.9277	-0.0281
1.9297	-0.0538
1.9316	-0.0519
1.9336	-0.0276
1.9355	0.000218
1.9375	0.0152
1.9395	0.0208
1.9414	0.0293
1.9434	0.0372
1.9453	0.032
1.9473	0.0116
1.9492	-0.00663
1.9512	-0.00867
1.9531	0.0014
1.9551	0.00121
1.957	-0.0237
1.959	-0.0521
1.9609	-0.0543
1.9629	-0.0309
1.9648	-4.37e-05
1.9668	0.0157
1.9688	0.0198
1.9707	0.0263
1.9727	0.034
1.9746	0.03
1.9766	0.0138
1.9785	-0.00158
1.9805	-0.00538
1.9824	0.00188
1.9844	0.00189
1.9863	-0.0204
1.9883	-0.0508
1.9902	-0.0576
1.9922	-0.0388
1.9941	-0.00424
1.9961	0.0197
1.998	0.0274
2	0.03
2.002	0.0323
2.0039	0.0285
2.0059	0.0146
2.0078	-0.00159
2.0098	-0.00896
2.0117	-0.0056
2.0137	-0.00613
2.0156	-0.0245
2.0176	-0.046
2.0195	-0.0513
2.0215	-0.0334
2.0234	-0.00038
2.0254	0.0242
2.0273	0.034
2.0293	0.0338
2.0313	0.0281
2.0332	0.0196
2.0352	0.0108
2.0371	0.00265
2.0391	-0.00373
2.041	-0.0086
2.043	-0.0177
2.0449	-0.0358
2.0469	-0.0447
2.0488	-0.0407
2.0508	-0.0219
2.0527	0.00193
2.0547	0.0222
2.0566	0.0354
2.0586	0.038
2.0605	0.0289
2.0625	0.0151
2.0645	0.00591
2.0664	7.16e-07
2.0684	-0.00706
2.0703	-0.0192
2.0723	-0.0372
2.0742	-0.0458
2.0762	-0.0393
2.0781	-0.0235
2.0801	-0.000852
2.082	0.02
2.084	0.0356
2.0859	0.04
2.0879	0.0295
2.0898	0.0125
2.0918	0.0034
2.0938	0.00286
2.0957	0.000193
2.0977	-0.0109
2.0996	-0.034
2.1016	-0.0498
2.1035	-0.0454
2.1055	-0.0284
2.1074	-0.00589
2.1094	0.014
2.1113	0.0327
2.1133	0.0452
2.1152	0.0398
2.1172	0.0199
2.1191	0.00212
2.1211	-0.00441
2.123	-0.00506
2.125	-0.0109
2.127	-0.0298
2.1289	-0.0463
2.1309	-0.043
2.1328	-0.0264
2.1348	-0.00407
2.1367	0.0141
2.1387	0.0297
2.1406	0.0381
2.1426	0.0347
2.1445	0.0214
2.1465	0.00949
2.1484	0.0017
2.1504	-0.00617
2.1523	-0.0211
2.1543	-0.0425
2.1563	-0.0505
2.1582	-0.0405
2.1602	-0.0209
2.1621	0.00206
2.1641	0.0227
2.166	0.0397
2.168	0.045
2.1699	0.0304
2.1719	0.0106
2.1738	0.000434
2.1758	-0.00194
2.1777	-0.00661
2.1797	-0.0226
2.1816	-0.0453
2.1836	-0.049
2.1855	-0.0357
2.1875	-0.0148
2.1895	0.00533
2.1914	0.0252
2.1934	0.0429
2.1953	0.0459
2.1973	0.0301
2.1992	0.0101
2.2012	-0.00255
2.2031	-0.00976
2.2051	-0.019
2.207	-0.0385
2.209	-0.0497
2.2109	-0.0413
2.2129	-0.022
2.2148	0.00212
2.2168	0.0228
2.2188	0.039
2.2207	0.0429
2.2227	0.0303
2.2246	0.0123
2.2266	0.00404
2.2285	-0.000774
2.2305	-0.0108
2.2324	-0.0319
2.2344	-0.0528
2.2363	-0.0499
2.2383	-0.0311
2.2402	-0.00874
2.2422	0.0122
2.2441	0.0348
2.2461	0.0505
2.248	0.0448
2.25	0.0223
2.252	0.00228
2.2539	-0.0077
2.2559	-0.0152
2.2578	-0.0288
2.2598	-0.0471
2.2617	-0.0477
2.2637	-0.0324
2.2656	-0.00995
2.2676	0.0119
2.2695	0.0327
2.2715	0.0441
2.2734	0.0381
2.2754	0.0207
2.2773	0.00799
2.2793	0.00222
2.2813	-0.0091
2.2832	-0.0322
2.2852	-0.055
2.2871	-0.0532
2.2891	-0.0324
2.291	-0.00702
2.293	0.0138
2.2949	0.0353
2.2969	0.0509
2.2988	0.0441
2.3008	0.0227
2.3027	0.00272
2.3047	-0.00757
2.3066	-0.0164
2.3086	-0.0325
2.3105	-0.0497
2.3125	-0.0484
2.3145	-0.0319
2.3164	-0.00871
2.3184	0.0148
2.3203	0.0394
2.3223	0.0508
2.3242	0.0401
2.3262	0.0203
2.3281	0.00521
2.3301	-0.00533
2.332	-0.021
2.334	-0.0461
2.3359	-0.058
2.3379	-0.0462
2.3398	-0.0217
2.3418	0.0033
2.3438	0.0266
2.3457	0.0484
2.3477	0.0518
2.3496	0.0323
2.3516	0.00875
2.3535	-0.00382
2.3555	-0.0119
2.3574	-0.0261
2.3594	-0.0478
2.3613	-0.0529
2.3633	-0.0384
2.3652	-0.0153
2.3672	0.00819
2.3691	0.0347
2.3711	0.0535
2.373	0.0468
2.375	0.0247
2.377	0.00722
2.3789	-0.00411
2.3809	-0.0192
2.3828	-0.0445
2.3848	-0.0596
2.3867	-0.0492
2.3887	-0.0249
2.3906	0.000688
2.3926	0.0258
2.3945	0.05
2.3965	0.054
2.3984	0.0344
2.4004	0.0116
2.4023	-0.00289
2.4043	-0.0145
2.4063	-0.035
2.4082	-0.0572
2.4102	-0.0546
2.4121	-0.0323
2.4141	-0.00641
2.416	0.0179
2.418	0.0432
2.4199	0.0568
2.4219	0.0431
2.4238	0.0182
2.4258	0.000703
2.4277	-0.0119
2.4297	-0.0283
2.4316	-0.0514
2.4336	-0.0573
2.4355	-0.0418
2.4375	-0.0165
2.4395	0.0104
2.4414	0.0392
2.4434	0.058
2.4453	0.0487
2.4473	0.0249
2.4492	0.00638
2.4512	-0.00875
2.4531	-0.0289
2.4551	-0.0564
2.457	-0.0639
2.459	-0.0442
2.4609	-0.0144
2.4629	0.0133
2.4648	0.0407
2.4668	0.0595
2.4688	0.0518
2.4707	0.0252
2.4727	0.0026
2.4746	-0.0133
2.4766	-0.0295
2.4785	-0.0515
2.4805	-0.0585
2.4824	-0.0421
2.4844	-0.0178
2.4863	0.00778
2.4883	0.0373
2.4902	0.0602
2.4922	0.0531
2.4941	0.0269
2.4961	0.00519
2.498	-0.0105
2.5	-0.0296
2.502	-0.0568
2.5039	-0.064
2.5059	-0.0456
2.5078	-0.0163
2.5098	0.0148
2.5117	0.0455
2.5137	0.0633
2.5156	0.0506
2.5176	0.023
2.5195	0.0027
2.5215	-0.0138
2.5234	-0.0374
2.5254	-0.063
2.5273	-0.0633
2.5293	-0.0378
2.5313	-0.00739
2.5332	0.0213
2.5352	0.0508
2.5371	0.0645
2.5391	0.0472
2.541	0.02
2.543	-0.00245
2.5449	-0.0213
2.5469	-0.0455
2.5488	-0.0646
2.5508	-0.0562
2.5527	-0.031
2.5547	-0.00328
2.5566	0.027
2.5586	0.0583
2.5605	0.0642
2.5625	0.0409
2.5645	0.0135
2.5664	-0.00727
2.5684	-0.0286
2.5703	-0.0578
2.5723	-0.0697
2.5742	-0.0526
2.5762	-0.022
2.5781	0.0118
2.5801	0.0458
2.582	0.0693
2.584	0.059
2.5859	0.0275
2.5879	0.00073
2.5898	-0.0189
2.5918	-0.0419
2.5938	-0.0652
2.5957	-0.0626
2.5977	-0.0371
2.5996	-0.00698
2.6016	0.0239
2.6035	0.0571
2.6055	0.0679
2.6074	0.0456
2.6094	0.0169
2.6113	-0.00586
2.6133	-0.0272
2.6152	-0.0563
2.6172	-0.0704
2.6191	-0.0542
2.6211	-0.0242
2.623	0.00903
2.625	0.0448
2.627	0.0692
2.6289	0.0588
2.6309	0.0291
2.6328	0.00385
2.6348	-0.0171
2.6367	-0.0448
2.6387	-0.0712
2.6406	-0.0665
2.6426	-0.0367
2.6445	-0.00114
2.6465	0.0332
2.6484	0.0649
2.6504	0.0686
2.6523	0.0426
2.6543	0.0141
2.6563	-0.0111
2.6582	-0.0375
2.6602	-0.0672
2.6621	-0.0713
2.6641	-0.0459
2.666	-0.0134
2.668	0.0189
2.6699	0.0539
2.6719	0.0708
2.6738	0.0536
2.6758	0.0241
2.6777	-0.00215
2.6797	-0.0287
2.6816	-0.0622
2.6836	-0.0762
2.6855	-0.0566
2.6875	-0.0233
2.6895	0.0117
2.6914	0.0489
2.6934	0.0755
2.6953	0.064
2.6973	0.0313
2.6992	-0.000803
2.7012	-0.0271
2.7031	-0.056
2.7051	-0.0744
2.707	-0.0606
2.709	-0.0302
2.7109	0.00262
2.7129	0.0408
2.7148	0.0735
2.7168	0.0686
2.7188	0.0373
2.7207	0.00545
2.7227	-0.02
2.7246	-0.0502
2.7266	-0.0755
2.7285	-0.0676
2.7305	-0.0378
2.7324	-0.00238
2.7344	0.0385
2.7363	0.0726
2.7383	0.0714
2.7402	0.0404
2.7422	0.00915
2.7441	-0.0171
2.7461	-0.0475
2.748	-0.0763
2.75	-0.0718
2.752	-0.0412
2.7539	-0.00193
2.7559	0.0393
2.7578	0.0747
2.7598	0.0738
2.7617	0.0432
2.7637	0.0111
2.7656	-0.0181
2.7676	-0.052
2.7695	-0.0804
2.7715	-0.073
2.7734	-0.0392
2.7754	-0.000874
2.7773	0.0389
2.7793	0.0734
2.7813	0.0731
2.7832	0.0439
2.7852	0.0113
2.7871	-0.019
2.7891	-0.0548
2.791	-0.083
2.793	-0.073
2.7949	-0.0374
2.7969	0.00258
2.7988	0.0448
2.8008	0.0797
2.8027	0.0748
2.8047	0.042
2.8066	0.00667
2.8086	-0.0272
2.8105	-0.0627
2.8125	-0.0847
2.8145	-0.0678
2.8164	-0.0315
2.8184	0.00634
2.8203	0.0503
2.8223	0.0823
2.8242	0.0724
2.8262	0.0375
2.8281	0.00166
2.8301	-0.0323
2.832	-0.0702
2.834	-0.086
2.8359	-0.0639
2.8379	-0.0251
2.8398	0.017
2.8418	0.0617
2.8438	0.0852
2.8457	0.0649
2.8477	0.0285
2.8496	-0.0062
2.8516	-0.0414
2.8535	-0.0789
2.8555	-0.0853
2.8574	-0.0561
2.8594	-0.0145
2.8613	0.0302
2.8633	0.0753
2.8652	0.0868
2.8672	0.0582
2.8691	0.0195
2.8711	-0.0178
2.873	-0.0582
2.875	-0.0897
2.877	-0.0804
2.8789	-0.0432
2.8809	0.00058
2.8828	0.0479
2.8848	0.0853
2.8867	0.0798
2.8887	0.046
2.8906	0.00729
2.8926	-0.032
2.8945	-0.0755
2.8965	-0.0945
2.8984	-0.0698
2.9004	-0.0264
2.9023	0.0208
2.9043	0.0698
2.9063	0.0926
2.9082	0.069
2.9102	0.0285
2.9121	-0.0122
2.9141	-0.0544
2.916	-0.0901
2.918	-0.086
2.9199	-0.05
2.9219	-0.00652
2.9238	0.0427
2.9258	0.0866
2.9277	0.0871
2.9297	0.0529
2.9316	0.0109
2.9336	-0.0318
2.9355	-0.0768
2.9375	-0.0968
2.9395	-0.0727
2.9414	-0.0295
2.9434	0.0193
2.9453	0.071
2.9473	0.0946
2.9492	0.0711
2.9512	0.0305
2.9531	-0.0117
2.9551	-0.0576
2.957	-0.0955
2.959	-0.0893
2.9609	-0.0508
2.9629	-0.00143
2.9648	0.0529
2.9668	0.0959
2.9688	0.0888
2.9707	0.0493
2.9727	0.0035
2.9746	-0.0441
2.9766	-0.0905
2.9785	-0.0996
2.9805	-0.067
2.9824	-0.019
2.9844	0.0351
2.9863	0.0872
2.9883	0.0979
2.9902	0.0649
2.9922	0.0197
2.9941	-0.0286
2.9961	-0.0807
2.998	-0.106
3	-0.0816
3.002	-0.034
3.0039	0.0208
3.0059	0.0795
3.0078	0.105
3.0098	0.078
3.0117	0.0301
3.0137	-0.02
3.0156	-0.0717
3.0176	-0.106
3.0195	-0.0895
3.0215	-0.0456
3.0234	0.00726
3.0254	0.0682
3.0273	0.106
3.0293	0.0891
3.0313	0.0435
3.0332	-0.00875
3.0352	-0.0646
3.0371	-0.107
3.0391	-0.0991
3.041	-0.0555
3.043	-0.00145
3.0449	0.061
3.0469	0.106
3.0488	0.0959
3.0508	0.0507
3.0527	-0.00271
3.0547	-0.0587
3.0566	-0.106
3.0586	-0.103
3.0605	-0.0611
3.0625	-0.00696
3.0645	0.0567
3.0664	0.107
3.0684	0.103
3.0703	0.0584
3.0723	0.00135
3.0742	-0.0586
3.0762	-0.109
3.0781	-0.108
3.0801	-0.0647
3.082	-0.00953
3.084	0.055
3.0859	0.107
3.0879	0.106
3.0898	0.0621
3.0918	0.00439
3.0938	-0.0592
3.0957	-0.112
3.0977	-0.112
3.0996	-0.0648
3.1016	-0.00771
3.1035	0.0584
3.1055	0.112
3.1074	0.109
3.1094	0.0627
3.1113	6.84e-05
3.1133	-0.0663
3.1152	-0.117
3.1172	-0.111
3.1191	-0.0619
3.1211	-0.00379
3.123	0.0641
3.125	0.115
3.127	0.109
3.1289	0.0611
3.1309	-0.003
3.1328	-0.0742
3.1348	-0.124
3.1367	-0.112
3.1387	-0.0569
3.1406	0.00527
3.1426	0.0749
3.1445	0.119
3.1465	0.105
3.1484	0.054
3.1504	-0.013
3.1523	-0.0848
3.1543	-0.129
3.1563	-0.107
3.1582	-0.0475
3.1602	0.0176
3.1621	0.0892
3.1641	0.124
3.166	0.101
3.168	0.0454
3.1699	-0.0279
3.1719	-0.103
3.1738	-0.136
3.1758	-0.1
3.1777	-0.0354
3.1797	0.0367
3.1816	0.105
3.1836	0.126
3.1855	0.0919
3.1875	0.0303
3.1895	-0.0474
3.1914	-0.121
3.1934	-0.138
3.1953	-0.0879
3.1973	-0.0168
3.1992	0.0608
3.2012	0.124
3.2031	0.125
3.2051	0.0777
3.207	0.00622
3.209	-0.0767
3.2109	-0.138
3.2129	-0.13
3.2148	-0.0681
3.2168	0.00752
3.2188	0.09
3.2207	0.136
3.2227	0.117
3.2246	0.0567
3.2266	-0.0218
3.2285	-0.108
3.2305	-0.15
3.2324	-0.115
3.2344	-0.0427
3.2363	0.0408
3.2383	0.119
3.2402	0.139
3.2422	0.0983
3.2441	0.0275
3.2461	-0.059
3.248	-0.136
3.25	-0.146
3.252	-0.089
3.2539	-0.00968
3.2559	0.0813
3.2578	0.142
3.2598	0.133
3.2617	0.0731
3.2637	-0.0104
3.2656	-0.104
3.2676	-0.159
3.2695	-0.131
3.2715	-0.056
3.2734	0.0349
3.2754	0.122
3.2773	0.152
3.2793	0.113
3.2813	0.0366
3.2832	-0.0605
3.2852	-0.147
3.2871	-0.159
3.2891	-0.0978
3.291	-0.0102
3.293	0.0889
3.2949	0.154
3.2969	0.143
3.2988	0.0776
3.3008	-0.0177
3.3027	-0.12
3.3047	-0.172
3.3066	-0.135
3.3086	-0.0523
3.3105	0.049
3.3125	0.141
3.3145	0.163
3.3164	0.114
3.3184	0.026
3.3203	-0.0834
3.3223	-0.168
3.3242	-0.165
3.3262	-0.0904
3.3281	0.00898
3.3301	0.115
3.332	0.169
3.334	0.142
3.3359	0.065
3.3379	-0.0433
3.3398	-0.149
3.3418	-0.181
3.3438	-0.125
3.3457	-0.0301
3.3477	0.0846
3.3496	0.168
3.3516	0.167
3.3535	0.0997
3.3555	-0.00683
3.3574	-0.127
3.3594	-0.19
3.3613	-0.154
3.3633	-0.0649
3.3652	0.0509
3.3672	0.156
3.3691	0.182
3.3711	0.132
3.373	0.0296
3.375	-0.0997
3.377	-0.19
3.3789	-0.178
3.3809	-0.096
3.3828	0.0203
3.3848	0.141
3.3867	0.193
3.3887	0.158
3.3906	0.0603
3.3926	-0.075
3.3945	-0.187
3.3965	-0.196
3.3984	-0.122
3.4004	-0.00702
3.4023	0.124
3.4043	0.197
3.4063	0.18
3.4082	0.0912
3.4102	-0.0486
3.4121	-0.18
3.4141	-0.213
3.416	-0.147
3.418	-0.0306
3.4199	0.11
3.4219	0.2
3.4238	0.196
3.4258	0.115
3.4277	-0.025
3.4297	-0.17
3.4316	-0.224
3.4336	-0.169
3.4355	-0.0547
3.4375	0.0969
3.4395	0.206
3.4414	0.215
3.4434	0.138
3.4453	-0.00853
3.4473	-0.167
3.4492	-0.235
3.4512	-0.188
3.4531	-0.0726
3.4551	0.0862
3.457	0.209
3.459	0.232
3.4609	0.16
3.4629	0.00756
3.4648	-0.164
3.4668	-0.245
3.4688	-0.206
3.4707	-0.089
3.4727	0.0823
3.4746	0.218
3.4766	0.247
3.4785	0.174
3.4805	0.0146
3.4824	-0.169
3.4844	-0.256
3.4863	-0.219
3.4883	-0.0985
3.4902	0.0826
3.4922	0.225
3.4941	0.26
3.4961	0.188
3.498	0.0182
3.5	-0.173
3.502	-0.266
3.5039	-0.233
3.5059	-0.105
3.5078	0.0884
3.5098	0.237
3.5117	0.273
3.5137	0.194
3.5156	0.0116
3.5176	-0.184
3.5195	-0.271
3.5215	-0.237
3.5234	-0.103
3.5254	0.098
3.5273	0.248
3.5293	0.286
3.5313	0.197
3.5332	-0.000791
3.5352	-0.201
3.5371	-0.283
3.5391	-0.243
3.541	-0.0947
3.543	0.116
3.5449	0.264
3.5469	0.297
3.5488	0.196
3.5508	-0.0179
3.5527	-0.22
3.5547	-0.298
3.5566	-0.252
3.5586	-0.0803
3.5605	0.144
3.5625	0.294
3.5645	0.315
3.5664	0.186
3.5684	-0.0533
3.5703	-0.255
3.5723	-0.323
3.5742	-0.256
3.5762	-0.0503
3.5781	0.188
3.5801	0.334
3.582	0.335
3.584	0.167
3.5859	-0.101
3.5879	-0.302
3.5898	-0.359
3.5918	-0.253
3.5938	-0.00359
3.5957	0.247
3.5977	0.385
3.5996	0.35
3.6016	0.128
3.6035	-0.167
3.6055	-0.364
3.6074	-0.398
3.6094	-0.232
3.6113	0.0675
3.6133	0.329
3.6152	0.442
3.6172	0.34
3.6191	0.0542
3.6211	-0.255
3.623	-0.433
3.625	-0.417
3.627	-0.176
3.6289	0.162
3.6309	0.419
3.6328	0.481
3.6348	0.293
3.6367	-0.0537
3.6387	-0.358
3.6406	-0.494
3.6426	-0.394
3.6445	-0.075
3.6465	0.284
3.6484	0.511
3.6504	0.485
3.6523	0.192
3.6543	-0.199
3.6563	-0.476
3.6582	-0.527
3.6602	-0.306
3.6621	0.0809
3.6641	0.426
3.666	0.572
3.668	0.418
3.6699	0.0328
3.6719	-0.356
3.6738	-0.566
3.6758	-0.499
3.6777	-0.162
3.6797	0.261
3.6816	0.558
3.6836	0.577
3.6855	0.278
3.6875	-0.166
3.6895	-0.507
3.6914	-0.602
3.6934	-0.387
3.6953	0.0371
3.6973	0.445
3.6992	0.64
3.7012	0.494
3.7031	0.0717
3.7051	-0.372
3.707	-0.619
3.709	-0.557
3.7109	-0.196
3.7129	0.265
3.7148	0.601
3.7168	0.635
3.7188	0.316
3.7207	-0.17
3.7227	-0.551
3.7246	-0.657
3.7266	-0.417
3.7285	0.046
3.7305	0.485
3.7324	0.687
3.7344	0.521
3.7363	0.0652
3.7383	-0.408
3.7402	-0.666
3.7422	-0.584
3.7441	-0.188
3.7461	0.303
3.748	0.65
3.75	0.661
3.752	0.302
3.7539	-0.211
3.7559	-0.601
3.7578	-0.684
3.7598	-0.402
3.7617	0.0907
3.7637	0.538
3.7656	0.72
3.7676	0.507
3.7695	0.0157
3.7715	-0.468
3.7734	-0.711
3.7754	-0.578
3.7773	-0.136
3.7793	0.376
3.7813	0.701
3.7832	0.653
3.7852	0.241
3.7871	-0.286
3.7891	-0.657
3.791	-0.689
3.793	-0.349
3.7949	0.171
3.7969	0.612
3.7988	0.736
3.8008	0.448
3.8027	-0.0787
3.8047	-0.551
3.8066	-0.738
3.8086	-0.528
3.8105	-0.041
3.8125	0.471
3.8145	0.747
3.8164	0.612
3.8184	0.139
3.8203	-0.392
3.8223	-0.721
3.8242	-0.662
3.8262	-0.25
3.8281	0.292
3.8301	0.694
3.832	0.721
3.834	0.341
3.8359	-0.209
3.8379	-0.646
3.8398	-0.74
3.8418	-0.434
3.8438	0.0948
3.8457	0.588
3.8477	0.772
3.8496	0.521
3.8516	-0.00855
3.8535	-0.529
3.8555	-0.769
3.8574	-0.584
3.8594	-0.0984
3.8613	0.448
3.8633	0.762
3.8652	0.649
3.8672	0.18
3.8691	-0.375
3.8711	-0.737
3.873	-0.687
3.875	-0.279
3.877	0.283
3.8789	0.705
3.8809	0.731
3.8828	0.35
3.8848	-0.214
3.8867	-0.667
3.8887	-0.744
3.8906	-0.424
3.8926	0.116
3.8945	0.61
3.8965	0.764
3.8984	0.49
3.9004	-0.0448
3.9023	-0.565
[truncated: 2,098 more rows]
