# Supplementary material for: Effect of the Supports’ Positions on the Vibration Characteristics of a Flexible Rotor Shafting
Source: Hindawi journal article supplement (doi:10.1155/2020/1592794), 2020-02-12
Supplement: f1 [file 1592794.f1.zip › 1592794.f1/test_data/Table10_5.xlsx]

## Sheet: Sheet1
Time t/s	vibration deformation amount u/mm
0	0.000768
0.002	0.00111
0.0039	0.001
0.0059	0.00153
0.0078	0.00162
0.0098	0.00142
0.0117	0.0018
0.0137	0.00153
0.0156	0.00179
0.0176	0.00224
0.0195	0.00224
0.0215	0.0024
0.0234	0.0023
0.0254	0.00226
0.0273	0.00228
0.0293	0.00212
0.0313	0.00258
0.0332	0.00267
0.0352	0.00286
0.0371	0.00252
0.0391	0.00297
0.041	0.00264
0.043	0.00263
0.0449	0.00248
0.0469	0.00292
0.0488	0.00342
0.0508	0.00364
0.0527	0.00333
0.0547	0.00361
0.0566	0.00364
0.0586	0.00347
0.0605	0.00365
0.0625	0.00379
0.0645	0.00385
0.0664	0.00343
0.0684	0.00385
0.0703	0.00389
0.0723	0.0037
0.0742	0.00361
0.0762	0.00383
0.0781	0.0039
0.0801	0.00394
0.082	0.00334
0.084	0.00319
0.0859	0.00253
0.0879	0.00181
0.0898	0.00123
0.0918	0.000854
0.0938	0.000329
0.0957	0.000436
0.0977	0.000261
0.0996	-0.000471
0.1016	-0.00124
0.1035	-0.002
0.1055	-0.00243
0.1074	-0.00261
0.1094	-0.00301
0.1113	-0.00337
0.1133	-0.00428
0.1152	-0.00489
0.1172	-0.00565
0.1191	-0.00631
0.1211	-0.00623
0.123	-0.00666
0.125	-0.00727
0.127	-0.00806
0.1289	-0.00887
0.1309	-0.00946
0.1328	-0.0109
0.1348	-0.0113
0.1367	-0.0115
0.1387	-0.0117
0.1406	-0.0125
0.1426	-0.0132
0.1445	-0.0136
0.1465	-0.0148
0.1484	-0.0147
0.1504	-0.0155
0.1523	-0.0159
0.1543	-0.0158
0.1563	-0.016
0.1582	-0.016
0.1602	-0.0165
0.1621	-0.0174
0.1641	-0.0177
0.166	-0.0179
0.168	-0.0173
0.1699	-0.0172
0.1719	-0.0176
0.1738	-0.0179
0.1758	-0.0179
0.1777	-0.0173
0.1797	-0.017
0.1816	-0.0146
0.1836	-0.0133
0.1855	-0.0142
0.1875	-0.0168
0.1895	-0.0186
0.1914	-0.0189
0.1934	-0.0186
0.1953	-0.0164
0.1973	-0.0132
0.1992	-0.0105
0.2012	-0.0104
0.2031	-0.0118
0.2051	-0.0131
0.207	-0.0136
0.209	-0.0123
0.2109	-0.0112
0.2129	-0.00922
0.2148	-0.00747
0.2168	-0.00782
0.2188	-0.00859
0.2207	-0.00951
0.2227	-0.009
0.2246	-0.00709
0.2266	-0.00464
0.2285	-0.00248
0.2305	-0.0011
0.2324	-0.000501
0.2344	-0.00132
0.2363	-0.00164
0.2383	-0.000717
0.2402	0.00149
0.2422	0.00368
0.2441	0.00526
0.2461	0.00592
0.248	0.00564
0.25	0.00425
0.252	0.00339
0.2539	0.00362
0.2559	0.00476
0.2578	0.00573
0.2598	0.00512
0.2617	0.00261
0.2637	-0.000519
0.2656	-0.00277
0.2676	-0.00239
0.2695	-0.00134
0.2715	-0.000221
0.2734	-0.000592
0.2754	-0.00218
0.2773	-0.00499
0.2793	-0.00855
0.2813	-0.0114
0.2832	-0.0114
0.2852	-0.0103
0.2871	-0.0109
0.2891	-0.0131
0.291	-0.0158
0.293	-0.0163
0.2949	-0.0153
0.2969	-0.0131
0.2988	-0.0107
0.3008	-0.00767
0.3027	-0.00528
0.3047	-0.0053
0.3066	-0.00445
0.3086	-0.00242
0.3105	-0.000871
0.3125	0.00023
0.3145	0.000741
0.3164	0.00186
0.3184	0.00321
0.3203	0.0014
0.3223	2.11e-05
0.3242	0.000644
0.3262	0.00197
0.3281	0.00329
0.3301	0.00402
0.332	0.00488
0.334	0.00446
0.3359	0.0028
0.3379	0.00131
0.3398	0.00036
0.3418	-0.00135
0.3438	-0.00344
0.3457	-0.00525
0.3477	-0.00461
0.3496	-0.00365
0.3516	-0.00369
0.3535	-0.00336
0.3555	-0.0019
0.3574	-3.9e-05
0.3594	0.000538
0.3613	0.000578
0.3633	0.00172
0.3652	0.00285
0.3672	0.00319
0.3691	0.00265
0.3711	0.00219
0.373	0.00216
0.375	0.00168
0.377	-0.000116
0.3789	-0.00276
0.3809	-0.00502
0.3828	-0.00736
0.3848	-0.00812
0.3867	-0.00815
0.3887	-0.00866
0.3906	-0.0121
0.3926	-0.016
0.3945	-0.0175
0.3965	-0.0161
0.3984	-0.0129
0.4004	-0.0105
0.4023	-0.00818
0.4043	-0.00547
0.4063	-0.00285
0.4082	-0.00176
0.4102	-0.000379
0.4121	7.12e-05
0.4141	0.000807
0.416	0.00232
0.418	0.00327
0.4199	0.00026
0.4219	-0.006
0.4238	-0.0148
0.4258	-0.0215
0.4277	-0.0231
0.4297	-0.021
0.4316	-0.0161
0.4336	-0.0107
0.4355	-0.0057
0.4375	-0.0036
0.4395	-0.00293
0.4414	-0.00211
0.4434	0.00143
0.4453	0.00877
0.4473	0.0146
0.4492	0.0144
0.4512	0.00567
0.4531	-0.00716
0.4551	-0.0171
0.457	-0.0191
0.459	-0.0125
0.4609	-0.00215
0.4629	0.00612
0.4648	0.00587
0.4668	-0.001
0.4688	-0.0082
0.4707	-0.00937
0.4727	-0.00108
0.4746	0.0113
0.4766	0.0177
0.4785	0.0136
0.4805	-0.00163
0.4824	-0.0199
0.4844	-0.0309
0.4863	-0.0286
0.4883	-0.016
0.4902	-0.00157
0.4922	0.00563
0.4941	0.00412
0.4961	-8.95e-05
0.498	-0.00517
0.5	-0.00842
0.502	-0.00635
0.5039	0.000698
0.5059	0.00698
0.5078	0.00678
0.5098	-0.000728
0.5117	-0.0116
0.5137	-0.0194
0.5156	-0.0216
0.5176	-0.0148
0.5195	-0.00402
0.5215	0.00472
0.5234	0.00488
0.5254	-0.00278
0.5273	-0.00951
0.5293	-0.0097
0.5313	-0.00307
0.5332	0.00595
0.5352	0.015
0.5371	0.0166
0.5391	0.0061
0.541	-0.00958
0.543	-0.0199
0.5449	-0.0188
0.5469	-0.00854
0.5488	0.00549
0.5508	0.0163
0.5527	0.0182
0.5547	0.00969
0.5566	-0.00418
0.5586	-0.0152
0.5605	-0.0173
0.5625	-0.0123
0.5645	-0.00884
0.5664	-0.0102
0.5684	-0.0145
0.5703	-0.018
0.5723	-0.0165
0.5742	-0.0106
0.5762	-0.00096
0.5781	0.00791
0.5801	0.0135
0.582	0.0109
0.584	-0.000662
0.5859	-0.0174
0.5879	-0.0295
0.5898	-0.0309
0.5918	-0.0214
0.5938	-0.00895
0.5957	0.00277
0.5977	0.00844
0.5996	0.0106
0.6016	0.0097
0.6035	0.00572
0.6055	-0.00315
0.6074	-0.00975
0.6094	-0.0116
0.6113	-0.00621
0.6133	-2.18e-05
0.6152	0.00254
0.6172	0.00435
0.6191	0.0072
0.6211	0.00754
0.623	0.0035
0.625	-0.00154
0.627	-0.00459
0.6289	-0.00763
0.6309	-0.0105
0.6328	-0.0128
0.6348	-0.0104
0.6367	-0.00459
0.6387	0.00122
0.6406	0.00271
0.6426	-0.000737
0.6445	-0.00507
0.6465	-0.00797
0.6484	-0.00764
0.6504	-0.00637
0.6523	-0.00517
0.6543	-0.00449
0.6563	-0.00497
0.6582	-0.0108
0.6602	-0.016
0.6621	-0.016
0.6641	-0.00832
0.666	0.00371
0.668	0.0158
0.6699	0.0203
0.6719	0.014
0.6738	-0.00089
0.6758	-0.017
0.6777	-0.0241
0.6797	-0.019
0.6816	-0.00224
0.6836	0.0143
0.6855	0.0207
0.6875	0.0163
0.6895	0.00479
0.6914	-0.0119
0.6934	-0.0264
0.6953	-0.0321
0.6973	-0.0253
0.6992	-0.0109
0.7012	0.00197
0.7031	0.00983
0.7051	0.0111
0.707	0.00734
0.709	-0.000565
0.7109	-0.0104
0.7129	-0.0203
0.7148	-0.0217
0.7168	-0.0161
0.7188	-0.00864
0.7207	-0.00172
0.7227	0.00534
0.7246	0.00939
0.7266	0.00919
0.7285	0.00221
0.7305	-0.00503
0.7324	-0.00752
0.7344	-0.00655
0.7363	-0.00236
0.7383	0.00279
0.7402	0.00853
0.7422	0.0115
0.7441	0.00766
0.7461	-8.52e-05
0.748	-0.00577
0.75	-0.0104
0.752	-0.0117
0.7539	-0.0108
0.7559	-0.00809
0.7578	-0.00659
0.7598	-0.00682
0.7617	-0.00753
0.7637	-0.00598
0.7656	-0.00425
0.7676	-0.000322
0.7695	-0.000805
0.7715	-0.00551
0.7734	-0.0111
0.7754	-0.0189
0.7773	-0.0234
0.7793	-0.0172
0.7813	-0.00242
0.7832	0.0151
0.7852	0.0239
0.7871	0.02
0.7891	0.0036
0.791	-0.0173
0.793	-0.0286
0.7949	-0.0242
0.7969	-0.00255
0.7988	0.0203
0.8008	0.0292
0.8027	0.0217
0.8047	0.00339
0.8066	-0.0199
0.8086	-0.038
0.8105	-0.0381
0.8125	-0.0191
0.8145	0.0068
0.8164	0.025
0.8184	0.0262
0.8203	0.0115
0.8223	-0.0118
0.8242	-0.0319
0.8262	-0.0387
0.8281	-0.0233
0.8301	0.00233
0.832	0.0192
0.834	0.0195
0.8359	0.00403
0.8379	-0.0127
0.8398	-0.021
0.8418	-0.015
0.8438	0.00296
0.8457	0.0197
0.8477	0.0251
0.8496	0.0126
0.8516	-0.00665
0.8535	-0.0202
0.8555	-0.0201
0.8574	-0.00567
0.8594	0.012
0.8613	0.0198
0.8633	0.0104
0.8652	-0.0122
0.8672	-0.036
0.8691	-0.0417
0.8711	-0.0241
0.873	0.00394
0.875	0.0254
0.877	0.0323
0.8789	0.0158
0.8809	-0.0173
0.8828	-0.0479
0.8848	-0.056
0.8867	-0.0321
0.8887	0.00622
0.8906	0.0385
0.8926	0.0486
0.8945	0.0313
0.8965	-0.00749
0.8984	-0.0452
0.9004	-0.0532
0.9023	-0.025
0.9043	0.0196
0.9063	0.051
0.9082	0.0498
0.9102	0.0212
0.9121	-0.0217
0.9141	-0.0557
0.916	-0.0581
0.918	-0.0248
0.9199	0.0197
0.9219	0.0467
0.9238	0.0409
0.9258	0.00626
0.9277	-0.0332
0.9297	-0.0545
0.9316	-0.0489
0.9336	-0.0118
0.9355	0.0257
0.9375	0.0391
0.9395	0.019
0.9414	-0.0138
0.9434	-0.0364
0.9453	-0.0341
0.9473	-0.00927
0.9492	0.0219
0.9512	0.0404
0.9531	0.0297
0.9551	-0.00246
0.957	-0.0313
0.959	-0.0406
0.9609	-0.0222
0.9629	0.0103
0.9648	0.0316
0.9668	0.0265
0.9688	-0.00404
0.9707	-0.0395
0.9727	-0.0529
0.9746	-0.0339
0.9766	0.00118
0.9785	0.0344
0.9805	0.0447
0.9824	0.0188
0.9844	-0.0243
0.9863	-0.059
0.9883	-0.0581
0.9902	-0.0217
0.9922	0.025
0.9941	0.056
0.9961	0.0515
0.998	0.0144
1	-0.0318
1.002	-0.0555
1.0039	-0.0416
1.0059	0.00139
1.0078	0.0439
1.0098	0.0574
1.0117	0.0352
1.0137	-0.0123
1.0156	-0.0532
1.0176	-0.0608
1.0195	-0.0342
1.0215	0.00856
1.0234	0.0389
1.0254	0.0392
1.0273	0.0114
1.0293	-0.025
1.0313	-0.05
1.0332	-0.046
1.0352	-0.0201
1.0371	0.0101
1.0391	0.0272
1.041	0.0247
1.043	0.00909
1.0449	-0.00999
1.0469	-0.0212
1.0488	-0.0194
1.0508	-0.0051
1.0527	0.01
1.0547	0.021
1.0566	0.0176
1.0586	0.00442
1.0605	-0.00783
1.0625	-0.0169
1.0645	-0.0212
1.0664	-0.02
1.0684	-0.0128
1.0703	0.00218
1.0723	0.0139
1.0742	0.0161
1.0762	0.00666
1.0781	-0.013
1.0801	-0.0302
1.082	-0.031
1.084	-0.0164
1.0859	0.00531
1.0879	0.0203
1.0898	0.0211
1.0918	0.00777
1.0938	-0.00828
1.0957	-0.0174
1.0977	-0.0138
1.0996	-0.000825
1.1016	0.016
1.1035	0.0244
1.1055	0.0164
1.1074	-0.00136
1.1094	-0.0177
1.1113	-0.0244
1.1133	-0.0196
1.1152	-0.0116
1.1172	-0.00304
1.1191	0.00432
1.1211	0.00328
1.123	-0.00137
1.125	-0.00711
1.127	-0.0134
1.1289	-0.0153
1.1309	-0.0176
1.1328	-0.0154
1.1348	-0.00691
1.1367	0.00874
1.1387	0.0195
1.1406	0.0187
1.1426	0.00438
1.1445	-0.0111
1.1465	-0.0201
1.1484	-0.0131
1.1504	0.00454
1.1523	0.0208
1.1543	0.0259
1.1563	0.0104
1.1582	-0.015
1.1602	-0.035
1.1621	-0.0343
1.1641	-0.0135
1.166	0.0153
1.168	0.0285
1.1699	0.0201
1.1719	-0.00758
1.1738	-0.0324
1.1758	-0.0383
1.1777	-0.0248
1.1797	-0.000609
1.1816	0.0201
1.1836	0.0275
1.1855	0.0198
1.1875	0.00204
1.1895	-0.0156
1.1914	-0.0229
1.1934	-0.0145
1.1953	0.00499
1.1973	0.0194
1.1992	0.0225
1.2012	0.0113
1.2031	-0.0091
1.2051	-0.0287
1.207	-0.0402
1.209	-0.0309
1.2109	-0.00446
1.2129	0.0214
1.2148	0.0326
1.2168	0.0186
1.2188	-0.0121
1.2207	-0.039
1.2227	-0.0483
1.2246	-0.0291
1.2266	0.00892
1.2285	0.0428
1.2305	0.0474
1.2324	0.0216
1.2344	-0.0165
1.2363	-0.0405
1.2383	-0.0345
1.2402	-0.00411
1.2422	0.0291
1.2441	0.0435
1.2461	0.0282
1.248	-0.00776
1.25	-0.0395
1.252	-0.0479
1.2539	-0.0277
1.2559	0.00363
1.2578	0.0264
1.2598	0.029
1.2617	0.00807
1.2637	-0.0191
1.2656	-0.0411
1.2676	-0.0424
1.2695	-0.0197
1.2715	0.0148
1.2734	0.0411
1.2754	0.0425
1.2773	0.0184
1.2793	-0.0178
1.2813	-0.0431
1.2832	-0.0383
1.2852	-0.00808
1.2871	0.0284
1.2891	0.0448
1.291	0.0283
1.293	-0.0116
1.2949	-0.0512
1.2969	-0.0565
1.2988	-0.0276
1.3008	0.0159
1.3027	0.0424
1.3047	0.0347
1.3066	0.00236
1.3086	-0.0339
1.3105	-0.051
1.3125	-0.0369
1.3145	-0.000601
1.3164	0.034
1.3184	0.0474
1.3203	0.0337
1.3223	0.00152
1.3242	-0.028
1.3262	-0.0372
1.3281	-0.0208
1.3301	0.00805
1.332	0.0295
1.334	0.0301
1.3359	0.00665
1.3379	-0.0253
1.3398	-0.0449
1.3418	-0.0407
1.3438	-0.014
1.3457	0.0153
1.3477	0.0324
1.3496	0.0212
1.3516	-0.0117
1.3535	-0.0406
1.3555	-0.0405
1.3574	-0.0124
1.3594	0.0219
1.3613	0.0412
1.3633	0.0351
1.3652	0.00849
1.3672	-0.0201
1.3691	-0.0343
1.3711	-0.0233
1.373	0.000168
1.375	0.0188
1.377	0.018
1.3789	0.00551
1.3809	-0.00785
1.3828	-0.0176
1.3848	-0.0235
1.3867	-0.0224
1.3887	-0.00761
1.3906	0.0101
1.3926	0.0159
1.3945	0.00712
1.3965	-0.00697
1.3984	-0.0137
1.4004	-0.00954
1.4023	0.00292
1.4043	0.0145
1.4063	0.0197
1.4082	0.012
1.4102	-0.00251
1.4121	-0.0152
1.4141	-0.0174
1.416	-0.0121
1.418	-0.00731
1.4199	-0.00518
1.4219	-0.0029
1.4238	0.000809
1.4258	0.000585
1.4277	-0.00568
1.4297	-0.0135
1.4316	-0.0199
1.4336	-0.015
1.4355	-0.00047
1.4375	0.0167
1.4395	0.0211
1.4414	0.0143
1.4434	-2.43e-05
1.4453	-0.00826
1.4473	-0.0074
1.4492	-0.00164
1.4512	0.00405
1.4531	0.00573
1.4551	0.00269
1.457	-0.00519
1.459	-0.0108
1.4609	-0.0141
1.4629	-0.0138
1.4648	-0.0119
1.4668	-0.00455
1.4688	0.00367
1.4707	0.00284
1.4727	-0.00574
1.4746	-0.0123
1.4766	-0.00644
1.4785	0.00536
1.4805	0.0166
1.4824	0.0155
1.4844	0.00759
1.4863	-0.0049
1.4883	-0.0108
1.4902	-0.0109
1.4922	-0.00558
1.4941	-0.00358
1.4961	-0.00594
1.498	-0.00749
1.5	-0.00426
1.502	-0.000859
1.5039	-0.00465
1.5059	-0.012
1.5078	-0.0154
1.5098	-0.00778
1.5117	0.00327
1.5137	0.00929
1.5156	0.00761
1.5176	0.00946
1.5195	0.00943
1.5215	0.0074
1.5234	0.000307
1.5254	-0.00373
1.5273	-0.00541
1.5293	-0.00374
1.5313	-0.00449
1.5332	-0.00576
1.5352	-0.00921
1.5371	-0.0128
1.5391	-0.015
1.541	-0.0112
1.543	-0.00106
1.5449	-0.000296
1.5469	-0.00659
1.5488	-0.00911
1.5508	-0.000654
1.5527	0.0106
1.5547	0.0144
1.5566	0.00772
1.5586	0.00113
1.5605	-0.00165
1.5625	-0.00242
1.5645	-0.0041
1.5664	-0.00578
1.5684	-0.00837
1.5703	-0.00616
1.5723	-0.00281
1.5742	-0.00174
1.5762	-0.00798
1.5781	-0.0119
1.5801	-0.00978
1.582	-0.00479
1.584	0.00159
1.5859	0.00269
1.5879	0.00436
1.5898	0.00876
1.5918	0.0127
1.5938	0.00995
1.5957	0.000341
1.5977	-0.00862
1.5996	-0.0098
1.6016	-0.00508
1.6035	-0.00369
1.6055	-0.00775
1.6074	-0.0134
1.6094	-0.0137
1.6113	-0.00906
1.6133	-0.00143
1.6152	-0.00101
1.6172	-0.00788
1.6191	-0.0096
1.6211	-0.00179
1.623	0.00788
1.625	0.0117
1.627	0.0103
1.6289	0.00912
1.6309	0.00626
1.6328	-0.000895
1.6348	-0.0106
1.6367	-0.0126
1.6387	-0.00747
1.6406	-0.000308
1.6426	0.00149
1.6445	-0.00535
1.6465	-0.0155
1.6484	-0.0161
1.6504	-0.00948
1.6523	-0.00376
1.6543	0.00132
1.6563	0.00455
1.6582	0.0109
1.6602	0.0158
1.6621	0.00978
1.6641	-0.00258
1.666	-0.0121
1.668	-0.00856
1.6699	-0.00138
1.6719	0.00115
1.6738	-0.00587
1.6758	-0.0123
1.6777	-0.0129
1.6797	-0.00935
1.6816	-0.00655
1.6836	-0.00631
1.6855	-0.00734
1.6875	-0.000341
1.6895	0.00692
1.6914	0.00669
1.6934	0.00513
1.6953	0.00833
1.6973	0.0135
1.6992	0.00906
1.7012	-0.00441
1.7031	-0.0122
1.7051	-0.0108
1.707	-0.00493
1.709	-0.00554
1.7109	-0.012
1.7129	-0.0156
1.7148	-0.0102
1.7168	-0.00342
1.7188	-0.00521
1.7207	-0.00661
1.7227	-0.00143
1.7246	0.0101
1.7266	0.0176
1.7285	0.0138
1.7305	0.00153
1.7324	-0.00591
1.7344	-0.00547
1.7363	-0.00493
1.7383	-0.00912
1.7402	-0.0103
1.7422	-0.00461
1.7441	-0.00132
1.7461	-0.00722
1.748	-0.0113
1.75	-0.0117
1.752	-0.00442
1.7539	0.00224
1.7559	0.00507
1.7578	0.00944
1.7598	0.017
1.7617	0.0187
1.7637	0.00568
1.7656	-0.0119
1.7676	-0.0178
1.7695	-0.0117
1.7715	-0.00425
1.7734	-0.00663
1.7754	-0.0114
1.7773	-0.0112
1.7793	-0.00356
1.7813	-0.0035
1.7832	-0.0113
1.7852	-0.0113
1.7871	0.0015
1.7891	0.0158
1.791	0.0193
1.793	0.0135
1.7949	0.00627
1.7969	-0.000414
1.7988	-0.01
1.8008	-0.0181
1.8027	-0.0158
1.8047	-0.00179
1.8066	0.00477
1.8086	-0.00403
1.8105	-0.0139
1.8125	-0.0125
1.8145	-0.00755
1.8164	-0.00505
1.8184	-0.00127
1.8203	0.011
1.8223	0.0261
1.8242	0.0233
1.8262	0.00209
1.8281	-0.0165
1.8301	-0.017
1.832	-0.0106
1.834	-0.00973
1.8359	-0.0097
1.8379	-0.00566
1.8398	0.000112
1.8418	-0.00146
1.8438	-0.0121
1.8457	-0.0172
1.8477	-0.006
1.8496	0.00765
1.8516	0.0165
1.8535	0.0208
1.8555	0.0218
1.8574	0.0108
1.8594	-0.0103
1.8613	-0.0252
1.8633	-0.0216
1.8652	-0.00656
1.8672	-0.000561
1.8691	-0.0059
1.8711	-0.00816
1.873	-0.0021
1.875	-0.0069
1.877	-0.0147
1.8789	-0.0127
1.8809	0.00964
1.8828	0.0303
1.8848	0.0265
1.8867	0.00515
1.8887	-0.00753
1.8906	-0.01
1.8926	-0.0169
1.8945	-0.0229
1.8965	-0.0119
1.8984	0.0052
1.9004	0.00834
1.9023	-0.00348
1.9043	-0.0164
1.9063	-0.0111
1.9082	-0.00355
1.9102	0.00176
1.9121	0.013
1.9141	0.0297
1.916	0.03
1.918	0.00261
1.9199	-0.0272
1.9219	-0.0315
1.9238	-0.0162
1.9258	-0.00917
1.9277	-0.0118
1.9297	-0.00285
1.9316	0.0138
1.9336	0.00624
1.9355	-0.0186
1.9375	-0.0257
1.9395	-0.00132
1.9414	0.0256
1.9434	0.0278
1.9453	0.0155
1.9473	0.00964
1.9492	-0.000285
1.9512	-0.0246
1.9531	-0.0378
1.9551	-0.0204
1.957	0.00255
1.959	0.00947
1.9609	0.00101
1.9629	-0.00252
1.9648	-0.00294
1.9668	-0.00919
1.9688	-0.00941
1.9707	0.00949
1.9727	0.0303
1.9746	0.0257
1.9766	-0.000381
1.9785	-0.0194
1.9805	-0.0222
1.9824	-0.0236
1.9844	-0.026
1.9863	-0.0151
1.9883	0.0135
1.9902	0.0215
1.9922	0.000875
1.9941	-0.0165
1.9961	-0.0103
1.998	0.00685
2	0.0144
2.002	0.0183
2.0039	0.0217
2.0059	0.0144
2.0078	-0.0129
2.0098	-0.0349
2.0117	-0.0332
2.0137	-0.0202
2.0156	-0.00675
2.0176	0.0062
2.0195	0.0139
2.0215	0.0113
2.0234	-0.00439
2.0254	-0.00923
2.0273	0.00229
2.0293	0.0124
2.0313	0.0101
2.0332	0.00689
2.0352	0.00356
2.0371	-0.00904
2.0391	-0.0261
2.041	-0.0339
2.043	-0.018
2.0449	0.00597
2.0469	0.0121
2.0488	0.00996
2.0508	0.00681
2.0527	0.007
2.0547	0.00401
2.0566	0.00182
2.0586	0.00458
2.0605	0.00705
2.0625	-3.94e-05
2.0645	-0.012
2.0664	-0.022
2.0684	-0.0283
2.0703	-0.0219
2.0723	-0.00375
2.0742	0.00839
2.0762	0.0106
2.0781	0.0066
2.0801	0.00965
2.082	0.0116
2.084	0.00403
2.0859	-0.00352
2.0879	0.000929
2.0898	0.00239
2.0918	-0.00757
2.0938	-0.0188
2.0957	-0.022
2.0977	-0.0125
2.0996	-0.00387
2.1016	-0.000615
2.1035	0.00492
2.1055	0.0109
2.1074	0.0155
2.1094	0.0134
2.1113	0.00549
2.1133	-0.00124
2.1152	-0.00672
2.1172	-0.0119
2.1191	-0.0177
2.1211	-0.0228
2.123	-0.0201
2.125	-0.00266
2.127	0.00676
2.1289	0.00279
2.1309	-0.00235
2.1328	0.00514
2.1348	0.0154
2.1367	0.0148
2.1387	0.00793
2.1406	0.00604
2.1426	0.00052
2.1445	-0.0134
2.1465	-0.0249
2.1484	-0.0283
2.1504	-0.0169
2.1523	-0.000841
2.1543	0.00664
2.1563	0.0088
2.1582	0.00721
2.1602	0.0107
2.1621	0.0102
2.1641	0.00199
2.166	-0.0034
2.168	0.00063
2.1699	-0.00224
2.1719	-0.0143
2.1738	-0.0276
2.1758	-0.024
2.1777	-0.00397
2.1797	0.00417
2.1816	0.00402
2.1836	0.00768
2.1855	0.0157
2.1875	0.0163
2.1895	0.00696
2.1914	-0.00124
2.1934	-0.00207
2.1953	-0.00675
2.1973	-0.0167
2.1992	-0.0251
2.2012	-0.0248
2.2031	-0.00936
2.2051	0.0027
2.207	0.0059
2.209	0.00521
2.2109	0.0115
2.2129	0.0171
2.2148	0.00831
2.2168	-0.00222
2.2188	-0.00155
2.2207	-0.00106
2.2227	-0.0119
2.2246	-0.0245
2.2266	-0.0243
2.2285	-0.00896
2.2305	0.000942
2.2324	0.00298
2.2344	0.00715
2.2363	0.0171
2.2383	0.0186
2.2402	0.00814
2.2422	-0.00249
2.2441	-0.00539
2.2461	-0.00794
2.248	-0.0193
2.25	-0.0291
2.252	-0.0233
2.2539	-0.00241
2.2559	0.00614
2.2578	0.00245
2.2598	0.00289
2.2617	0.0138
2.2637	0.0191
2.2656	0.00793
2.2676	0.00137
2.2695	0.00436
2.2715	-0.00146
2.2734	-0.0195
2.2754	-0.0326
2.2773	-0.0243
2.2793	-0.00502
2.2813	0.00302
2.2832	0.00592
2.2852	0.013
2.2871	0.0245
2.2891	0.0168
2.291	-0.00384
2.293	-0.0107
2.2949	-0.00272
2.2969	-0.00588
2.2988	-0.0221
2.3008	-0.0304
2.3027	-0.0116
2.3047	0.00657
2.3066	0.00223
2.3086	-0.000644
2.3105	0.0133
2.3125	0.0276
2.3145	0.0167
2.3164	-0.0015
2.3184	-0.00518
2.3203	-0.0027
2.3223	-0.0153
2.3242	-0.0339
2.3262	-0.0309
2.3281	-0.00476
2.3301	0.0108
2.332	0.00733
2.334	0.00623
2.3359	0.0199
2.3379	0.0209
2.3398	-0.00018
2.3418	-0.0114
2.3438	-0.00307
2.3457	0.000103
2.3477	-0.0173
2.3496	-0.0315
2.3516	-0.0163
2.3535	0.00383
2.3555	0.00444
2.3574	0.00289
2.3594	0.0177
2.3613	0.0307
2.3633	0.0165
2.3652	-0.00735
2.3672	-0.0131
2.3691	-0.0104
2.3711	-0.0203
2.373	-0.0347
2.375	-0.0231
2.377	0.00616
2.3789	0.0149
2.3809	0.00512
2.3828	0.0064
2.3848	0.0207
2.3867	0.0178
2.3887	-0.000493
2.3906	-0.00511
2.3926	0.000437
2.3945	-0.00683
2.3965	-0.0288
2.3984	-0.0329
2.4004	-0.0108
2.4023	0.00643
2.4043	0.00844
2.4063	0.0139
2.4082	0.0287
2.4102	0.0242
2.4121	-0.00151
2.4141	-0.018
2.416	-0.0156
2.418	-0.0131
2.4199	-0.0253
2.4219	-0.024
2.4238	-0.000681
2.4258	0.0127
2.4277	0.00643
2.4297	0.00394
2.4316	0.0186
2.4336	0.0237
2.4355	0.00927
2.4375	-0.00429
2.4395	-0.00863
2.4414	-0.0148
2.4434	-0.0327
2.4453	-0.0343
2.4473	-0.0104
2.4492	0.0126
2.4512	0.0162
2.4531	0.0169
2.4551	0.0241
2.457	0.016
2.459	-0.00493
2.4609	-0.0152
2.4629	-0.0108
2.4648	-0.0104
2.4668	-0.0225
2.4688	-0.0207
2.4707	-0.00301
2.4727	0.00662
2.4746	0.00367
2.4766	0.011
2.4785	0.026
2.4805	0.0238
2.4824	0.00512
2.4844	-0.00915
2.4863	-0.0164
2.4883	-0.0283
2.4902	-0.0389
2.4922	-0.0241
2.4941	0.00485
2.4961	0.0178
2.498	0.0155
2.5	0.0181
2.502	0.0213
2.5039	0.0071
2.5059	-0.00734
2.5078	-0.00831
2.5098	-0.00516
2.5117	-0.0159
2.5137	-0.0278
2.5156	-0.0187
2.5176	-0.00195
2.5195	0.00387
2.5215	0.0102
2.5234	0.0265
2.5254	0.0314
2.5273	0.0117
2.5293	-0.00902
2.5313	-0.0182
2.5332	-0.025
2.5352	-0.0356
2.5371	-0.0283
2.5391	0.000935
2.541	0.0184
2.543	0.016
2.5449	0.0133
2.5469	0.0201
2.5488	0.0138
2.5508	-0.00114
2.5527	-0.0079
2.5547	-0.00793
2.5566	-0.017
2.5586	-0.0319
2.5605	-0.0254
2.5625	-0.00518
2.5645	0.0073
2.5664	0.0139
2.5684	0.0272
2.5703	0.031
2.5723	0.0112
2.5742	-0.00881
2.5762	-0.0178
2.5781	-0.0217
2.5801	-0.0314
2.582	-0.026
2.584	-0.000917
2.5859	0.0149
2.5879	0.0131
2.5898	0.0138
2.5918	0.0224
2.5938	0.016
2.5957	0.000407
2.5977	-0.00821
2.5996	-0.0108
2.6016	-0.0247
2.6035	-0.037
2.6055	-0.0238
2.6074	0.000693
2.6094	0.0116
2.6113	0.0161
2.6133	0.0276
2.6152	0.0293
2.6172	0.00885
2.6191	-0.00848
2.6211	-0.0155
2.623	-0.0207
2.625	-0.031
2.627	-0.0248
2.6289	-0.00192
2.6309	0.0112
2.6328	0.0129
2.6348	0.02
2.6367	0.027
2.6387	0.0135
2.6406	-0.00444
2.6426	-0.0119
2.6445	-0.019
2.6465	-0.0328
2.6484	-0.0345
2.6504	-0.00941
2.6523	0.0103
2.6543	0.014
2.6563	0.0183
2.6582	0.0293
2.6602	0.0226
2.6621	0.0023
2.6641	-0.0118
2.666	-0.0173
2.668	-0.0278
2.6699	-0.0345
2.6719	-0.0182
2.6738	0.00383
2.6758	0.014
2.6777	0.0197
2.6797	0.0297
2.6816	0.022
2.6836	0.000942
2.6855	-0.0119
2.6875	-0.0168
2.6895	-0.0256
2.6914	-0.0348
2.6934	-0.0172
2.6953	0.00638
2.6973	0.0131
2.6992	0.0142
2.7012	0.0259
2.7031	0.0266
2.7051	0.00836
2.707	-0.00807
2.709	-0.0152
2.7109	-0.0268
2.7129	-0.0401
2.7148	-0.0273
2.7168	-0.00108
2.7188	0.0138
2.7207	0.0196
2.7227	0.0295
2.7246	0.0277
2.7266	0.00807
2.7285	-0.00851
2.7305	-0.0154
2.7324	-0.0243
2.7344	-0.034
2.7363	-0.0213
2.7383	0.00109
2.7402	0.0107
2.7422	0.0142
2.7441	0.0278
2.7461	0.028
2.748	0.00862
2.75	-0.00751
2.752	-0.0165
2.7539	-0.0295
2.7559	-0.0413
2.7578	-0.0253
2.7598	0.00245
2.7617	0.0156
2.7637	0.0194
2.7656	0.03
2.7676	0.0286
2.7695	0.00856
2.7715	-0.00874
2.7734	-0.0183
2.7754	-0.029
2.7773	-0.0365
2.7793	-0.0206
2.7813	0.00224
2.7832	0.0126
2.7852	0.0205
2.7871	0.0332
2.7891	0.0236
2.791	0.00154
2.793	-0.0116
2.7949	-0.0194
2.7969	-0.0326
2.7988	-0.0378
2.8008	-0.014
2.8027	0.0107
2.8047	0.0171
2.8066	0.0213
2.8086	0.0317
2.8105	0.0217
2.8125	0.00104
2.8145	-0.0142
2.8164	-0.0227
2.8184	-0.0379
2.8203	-0.0357
2.8223	-0.012
2.8242	0.00753
2.8262	0.0174
2.8281	0.0296
2.8301	0.0345
2.832	0.0157
2.834	-0.00395
2.8359	-0.0149
2.8379	-0.0259
2.8398	-0.0392
2.8418	-0.0273
2.8438	7.02e-05
2.8457	0.0136
2.8477	0.0186
2.8496	0.0325
2.8516	0.0306
2.8535	0.0078
2.8555	-0.011
2.8574	-0.0217
2.8594	-0.036
2.8613	-0.042
2.8633	-0.0186
2.8652	0.00662
2.8672	0.0189
2.8691	0.0269
2.8711	0.0356
2.873	0.0223
2.875	-0.000254
2.877	-0.0144
2.8789	-0.0251
2.8809	-0.0391
2.8828	-0.0329
2.8848	-0.00539
2.8867	0.0118
2.8887	0.0198
2.8906	0.0349
2.8926	0.033
2.8945	0.00812
2.8965	-0.0108
2.8984	-0.0224
2.9004	-0.0356
2.9023	-0.0426
2.9043	-0.0177
2.9063	0.00988
2.9082	0.0208
2.9102	0.028
2.9121	0.0356
2.9141	0.0207
2.916	-0.00183
2.918	-0.017
2.9199	-0.0288
2.9219	-0.0437
2.9238	-0.0318
2.9258	-0.00466
2.9277	0.0119
2.9297	0.0229
2.9316	0.0389
2.9336	0.0319
2.9355	0.00734
2.9375	-0.0115
2.9395	-0.023
2.9414	-0.0388
2.9434	-0.0405
2.9453	-0.0126
2.9473	0.0123
2.9492	0.0221
2.9512	0.0349
2.9531	0.0375
2.9551	0.0145
2.957	-0.0086
2.959	-0.0244
2.9609	-0.041
2.9629	-0.0471
2.9648	-0.021
2.9668	0.00705
2.9688	0.0212
2.9707	0.0323
2.9727	0.0404
2.9746	0.0223
2.9766	-0.00298
2.9785	-0.0191
2.9805	-0.0326
2.9824	-0.0446
2.9844	-0.0287
2.9863	0.0013
2.9883	0.0167
2.9902	0.0296
2.9922	0.0433
2.9941	0.0257
2.9961	-0.00099
2.998	-0.0193
3	-0.0342
3.002	-0.0491
3.0039	-0.0352
3.0059	-7.16e-07
3.0078	0.0207
3.0098	0.0315
3.0117	0.0415
3.0137	0.0304
3.0156	0.00366
3.0176	-0.0171
3.0195	-0.0328
3.0215	-0.0489
3.0234	-0.0369
3.0254	-0.00552
3.0273	0.0142
3.0293	0.0276
3.0313	0.044
3.0332	0.0332
3.0352	0.00579
3.0371	-0.0162
3.0391	-0.0309
3.041	-0.0472
3.043	-0.0388
3.0449	-0.00528
3.0469	0.0166
3.0488	0.0298
3.0508	0.0448
3.0527	0.0348
3.0547	0.00505
3.0566	-0.0177
3.0586	-0.0366
3.0605	-0.0544
3.0625	-0.0406
3.0645	-0.00514
3.0664	0.0196
3.0684	0.0346
3.0703	0.0478
3.0723	0.0347
3.0742	0.00333
3.0762	-0.0203
3.0781	-0.0376
3.0801	-0.0518
3.082	-0.0354
3.084	0.00101
3.0859	0.021
3.0879	0.0361
3.0898	0.0486
3.0918	0.0283
3.0938	-0.00391
3.0957	-0.0251
3.0977	-0.043
3.0996	-0.0539
3.1016	-0.0314
3.1035	0.00603
3.1055	0.026
3.1074	0.041
3.1094	0.047
3.1113	0.0253
3.1133	-0.00487
3.1152	-0.0268
3.1172	-0.0482
3.1191	-0.0547
3.1211	-0.0243
3.123	0.00876
3.125	0.0262
3.127	0.0463
3.1289	0.0479
3.1309	0.0178
3.1328	-0.0123
3.1348	-0.034
3.1367	-0.0529
3.1387	-0.05
3.1406	-0.013
3.1426	0.0179
3.1445	0.0347
3.1465	0.052
3.1484	0.0415
3.1504	0.00686
3.1523	-0.0209
3.1543	-0.045
3.1563	-0.0623
3.1582	-0.0417
3.1602	-0.00135
3.1621	0.0256
3.1641	0.0449
3.166	0.0542
3.168	0.0314
3.1699	-0.00415
3.1719	-0.0299
3.1738	-0.0526
3.1758	-0.0576
3.1777	-0.024
3.1797	0.0146
3.1816	0.0326
3.1836	0.053
3.1855	0.0493
3.1875	0.0132
3.1895	-0.02
3.1914	-0.0442
3.1934	-0.0628
3.1953	-0.0475
3.1973	-0.00473
3.1992	0.0254
3.2012	0.046
3.2031	0.0561
3.2051	0.0359
3.207	-0.00147
3.209	-0.0296
3.2109	-0.0546
3.2129	-0.0629
3.2148	-0.0292
3.2168	0.011
3.2188	0.0326
3.2207	0.0555
3.2227	0.0518
3.2246	0.0172
3.2266	-0.0178
3.2285	-0.0455
3.2305	-0.0651
3.2324	-0.0498
3.2344	-0.00388
3.2363	0.0271
3.2383	0.0501
3.2402	0.0616
3.2422	0.0362
3.2441	-0.00578
3.2461	-0.0372
3.248	-0.0669
3.25	-0.067
3.252	-0.0235
3.2539	0.0176
3.2559	0.0442
3.2578	0.0646
3.2598	0.051
3.2617	0.00925
3.2637	-0.0282
3.2656	-0.0588
3.2676	-0.0715
3.2695	-0.0399
3.2715	0.0107
3.2734	0.0378
3.2754	0.0624
3.2773	0.0614
3.2793	0.0201
3.2813	-0.0217
3.2832	-0.0555
3.2852	-0.0764
3.2871	-0.0533
3.2891	-0.00181
3.291	0.035
3.293	0.0596
3.2949	0.0669
3.2969	0.0346
3.2988	-0.0108
3.3008	-0.0447
3.3027	-0.0729
3.3047	-0.0654
3.3066	-0.0144
3.3086	0.0254
3.3105	0.0526
3.3125	0.0705
3.3145	0.0442
3.3164	-0.000645
3.3184	-0.04
3.3203	-0.0716
3.3223	-0.0728
3.3242	-0.026
3.3262	0.0212
3.3281	0.0519
3.3301	0.0727
3.332	0.0562
3.334	0.00774
3.3359	-0.0351
3.3379	-0.0742
3.3398	-0.0845
3.3418	-0.0375
3.3438	0.0149
3.3457	0.0519
3.3477	0.0774
3.3496	0.0635
3.3516	0.0147
3.3535	-0.0335
3.3555	-0.0745
3.3574	-0.0873
3.3594	-0.0429
3.3613	0.0164
3.3633	0.0531
3.3652	0.0812
3.3672	0.0681
3.3691	0.014
3.3711	-0.0373
3.373	-0.0817
3.375	-0.0931
3.377	-0.0451
3.3789	0.016
3.3809	0.0582
3.3828	0.0847
3.3848	0.0701
3.3867	0.0161
3.3887	-0.0369
3.3906	-0.0798
3.3926	-0.0941
3.3945	-0.0461
3.3965	0.0172
3.3984	0.0566
3.4004	0.0867
3.4023	0.0687
3.4043	0.014
3.4063	-0.0394
3.4082	-0.0837
3.4102	-0.0949
3.4121	-0.0441
3.4141	0.0185
3.416	0.0622
3.418	0.0897
3.4199	0.0707
3.4219	0.0127
3.4238	-0.0419
3.4258	-0.0921
3.4277	-0.0998
3.4297	-0.0422
3.4316	0.0206
3.4336	0.0686
3.4355	0.0957
3.4375	0.0689
3.4395	0.00856
3.4414	-0.0506
3.4434	-0.0996
3.4453	-0.0989
3.4473	-0.0343
3.4492	0.0319
3.4512	0.0794
3.4531	0.103
3.4551	0.0633
3.457	-0.00419
3.459	-0.0681
3.4609	-0.116
3.4629	-0.0955
3.4648	-0.0212
3.4668	0.045
3.4688	0.0941
3.4707	0.105
3.4727	0.0535
3.4746	-0.0191
3.4766	-0.0834
3.4785	-0.12
3.4805	-0.0825
3.4824	-0.00173
3.4844	0.0573
3.4863	0.105
3.4883	0.0975
3.4902	0.0338
3.4922	-0.0384
3.4941	-0.101
3.4961	-0.119
3.498	-0.0608
3.5	0.0163
3.502	0.0746
3.5039	0.112
3.5059	0.0875
3.5078	0.0142
3.5098	-0.0575
3.5117	-0.118
3.5137	-0.113
3.5156	-0.038
3.5176	0.0336
3.5195	0.0924
3.5215	0.114
3.5234	0.0692
3.5254	-0.00812
3.5273	-0.0824
3.5293	-0.127
3.5313	-0.0923
3.5332	-0.00936
3.5352	0.058
3.5371	0.11
3.5391	0.11
3.541	0.0422
3.543	-0.0389
3.5449	-0.116
3.5469	-0.131
3.5488	-0.0621
3.5508	0.0204
3.5527	0.0868
3.5547	0.124
3.5566	0.0916
3.5586	0.0111
3.5605	-0.075
3.5625	-0.136
3.5645	-0.113
3.5664	-0.0218
3.5684	0.0532
3.5703	0.113
3.5723	0.119
3.5742	0.0558
3.5762	-0.0317
3.5781	-0.116
3.5801	-0.141
3.582	-0.0712
3.584	0.0204
3.5859	0.0907
3.5879	0.13
3.5898	0.0971
3.5918	0.0132
3.5938	-0.0775
3.5957	-0.146
3.5977	-0.118
3.5996	-0.0213
3.6016	0.0609
3.6035	0.122
3.6055	0.122
3.6074	0.0558
3.6094	-0.0373
3.6113	-0.125
3.6133	-0.146
3.6152	-0.0662
3.6172	0.0313
3.6191	0.104
3.6211	0.138
3.623	0.0908
3.625	0.000938
3.627	-0.098
3.6289	-0.161
3.6309	-0.111
3.6328	-0.00598
3.6348	0.0828
3.6367	0.139
3.6387	0.123
3.6406	0.0402
3.6426	-0.0617
3.6445	-0.15
3.6465	-0.148
3.6484	-0.0456
3.6504	0.056
3.6523	0.131
3.6543	0.143
3.6563	0.0729
3.6582	-0.0284
3.6602	-0.134
3.6621	-0.169
3.6641	-0.0864
3.666	0.0291
3.668	0.119
3.6699	0.157
3.6719	0.107
3.6738	0.00437
3.6758	-0.108
3.6777	-0.181
3.6797	-0.126
3.6816	-0.00484
3.6836	0.101
3.6855	0.162
3.6875	0.134
3.6895	0.0375
3.6914	-0.0821
3.6934	-0.177
3.6953	-0.159
3.6973	-0.0377
3.6992	0.0824
3.7012	0.165
3.7031	0.16
3.7051	0.0645
3.707	-0.058
3.709	-0.176
3.7109	-0.187
3.7129	-0.0736
3.7148	0.0618
3.7168	0.163
3.7188	0.179
3.7207	0.0962
3.7227	-0.0343
3.7246	-0.162
3.7266	-0.206
3.7285	-0.105
3.7305	0.0401
3.7324	0.157
3.7344	0.196
3.7363	0.118
3.7383	-0.0118
3.7402	-0.154
3.7422	-0.218
3.7441	-0.133
3.7461	0.0194
3.748	0.151
3.75	0.208
3.752	0.145
3.7539	0.00745
3.7559	-0.142
3.7578	-0.231
3.7598	-0.158
3.7617	-0.00126
3.7637	0.144
3.7656	0.218
3.7676	0.163
3.7695	0.0268
3.7715	-0.133
3.7734	-0.236
3.7754	-0.179
3.7773	-0.0166
3.7793	0.14
3.7813	0.23
3.7832	0.183
3.7852	0.04
3.7871	-0.13
3.7891	-0.25
3.791	-0.198
3.793	-0.0327
3.7949	0.139
3.7969	0.239
3.7988	0.201
3.8008	0.0546
3.8027	-0.126
3.8047	-0.256
3.8066	-0.215
3.8086	-0.0416
3.8105	0.138
3.8125	0.253
3.8145	0.214
3.8164	0.0635
3.8184	-0.13
3.8203	-0.269
3.8223	-0.227
3.8242	-0.0496
3.8262	0.145
3.8281	0.266
3.8301	0.232
3.832	0.0705
3.834	-0.134
3.8359	-0.285
3.8379	-0.24
3.8398	-0.0548
3.8418	0.152
3.8438	0.283
3.8457	0.243
3.8477	0.0767
3.8496	-0.145
3.8516	-0.298
3.8535	-0.252
3.8555	-0.0542
3.8574	0.166
3.8594	0.305
3.8613	0.258
3.8633	0.0749
3.8652	-0.165
3.8672	-0.323
3.8691	-0.261
3.8711	-0.0512
3.873	0.189
3.875	0.327
3.877	0.271
3.8789	0.0697
3.8809	-0.186
3.8828	-0.344
3.8848	-0.269
3.8867	-0.0411
3.8887	0.216
3.8906	0.355
3.8926	0.278
3.8945	0.0584
3.8965	-0.22
3.8984	-0.368
3.9004	-0.275
3.9023	-0.0238
[truncated: 2,098 more rows]
