# Supplementary material for: Effect of the Supports’ Positions on the Vibration Characteristics of a Flexible Rotor Shafting
Source: Hindawi journal article supplement (doi:10.1155/2020/1592794), 2020-02-12
Supplement: f1 [file 1592794.f1.zip › 1592794.f1/test_data/Table10_6.xlsx]

## Sheet: Sheet1
Time t/s	vibration deformation amount u/mm
0	-0.000844
0.002	-0.00106
0.0039	-0.00109
0.0059	-0.00104
0.0078	-0.00114
0.0098	-0.00147
0.0117	-0.00133
0.0137	-0.00115
0.0156	-0.00125
0.0176	-0.000785
0.0195	-0.00118
0.0215	-0.001
0.0234	-0.00164
0.0254	-0.00132
0.0273	-0.00136
0.0293	-0.00154
0.0313	-0.00138
0.0332	-0.00157
0.0352	-0.00166
0.0371	-0.00147
0.0391	-0.00124
0.041	-0.00148
0.043	-0.00158
0.0449	-0.0015
0.0469	-0.00172
0.0488	-0.00217
0.0508	-0.00178
0.0527	-0.00173
0.0547	-0.00175
0.0566	-0.00235
0.0586	-0.00217
0.0605	-0.00254
0.0625	-0.00249
0.0645	-0.00242
0.0664	-0.00265
0.0684	-0.0025
0.0703	-0.00251
0.0723	-0.00285
0.0742	-0.00356
0.0762	-0.00338
0.0781	-0.00325
0.0801	-0.00299
0.082	-0.00292
0.084	-0.00334
0.0859	-0.00361
0.0879	-0.00363
0.0898	-0.00411
0.0918	-0.00394
0.0938	-0.0035
0.0957	-0.00374
0.0977	-0.00358
0.0996	-0.00385
0.1016	-0.00416
0.1035	-0.00442
0.1055	-0.00414
0.1074	-0.00349
0.1094	-0.00362
0.1113	-0.00376
0.1133	-0.00363
0.1152	-0.00408
0.1172	-0.00379
0.1191	-0.00304
0.1211	-0.00216
0.123	-0.00124
0.125	-0.00195
0.127	-0.00268
0.1289	-0.00329
0.1309	-0.00325
0.1328	-0.00164
0.1348	-0.000209
0.1367	0.000793
0.1387	0.000868
0.1406	0.000705
0.1426	6.73e-05
0.1445	-3.37e-05
0.1465	0.000471
0.1484	0.00201
0.1504	0.00348
0.1523	0.00451
0.1543	0.00421
0.1563	0.00357
0.1582	0.00344
0.1602	0.0037
0.1621	0.00453
0.1641	0.00562
0.166	0.00705
0.168	0.00736
0.1699	0.00741
0.1719	0.0067
0.1738	0.00663
0.1758	0.00734
0.1777	0.00817
0.1797	0.00969
0.1816	0.0104
0.1836	0.0106
0.1855	0.0104
0.1875	0.0107
0.1895	0.0108
0.1914	0.011
0.1934	0.0111
0.1953	0.0113
0.1973	0.0119
0.1992	0.0121
0.2012	0.0115
0.2031	0.0102
0.2051	0.00914
0.207	0.00852
0.209	0.00812
0.2109	0.00808
0.2129	0.00797
0.2148	0.00704
0.2168	0.00577
0.2188	0.00423
0.2207	0.00361
0.2227	0.00352
0.2246	0.0037
0.2266	0.00298
0.2285	0.00187
0.2305	0.0012
0.2324	0.00027
0.2344	-0.000791
0.2363	-0.00165
0.2383	-0.00201
0.2402	-0.00221
0.2422	-0.00197
0.2441	-0.00136
0.2461	-0.00176
0.248	-0.00222
0.25	-0.0028
0.252	-0.0027
0.2539	-0.00164
0.2559	-0.00144
0.2578	-0.000541
0.2598	-0.00012
0.2617	0.000855
0.2637	0.00139
0.2656	0.00143
0.2676	0.00109
0.2695	0.00109
0.2715	0.00193
0.2734	0.00294
0.2754	0.00363
0.2773	0.00403
0.2793	0.00517
0.2813	0.00551
0.2832	0.00555
0.2852	0.00512
0.2871	0.00374
0.2891	0.0028
0.291	0.0024
0.293	0.00149
0.2949	0.00063
0.2969	-0.000238
0.2988	-0.00139
0.3008	-0.00242
0.3027	-0.00364
0.3047	-0.00502
0.3066	-0.00755
0.3086	-0.0104
0.3105	-0.013
0.3125	-0.0141
0.3145	-0.0141
0.3164	-0.0139
0.3184	-0.0135
0.3203	-0.0127
0.3223	-0.0113
0.3242	-0.0107
0.3262	-0.00976
0.3281	-0.00986
0.3301	-0.00821
0.332	-0.00717
0.334	-0.00772
0.3359	-0.00866
0.3379	-0.00842
0.3398	-0.0061
0.3418	-0.00298
0.3438	-0.00121
0.3457	-0.00134
0.3477	-0.00107
0.3496	-0.000938
0.3516	-0.000894
0.3535	-0.002
0.3555	-0.00264
0.3574	-0.00212
0.3594	-0.00139
0.3613	-0.00154
0.3633	-0.00273
0.3652	-0.00257
0.3672	-0.000303
0.3691	0.00229
0.3711	0.00369
0.373	0.00427
0.375	0.00645
0.377	0.00922
0.3789	0.0121
0.3809	0.0134
0.3828	0.0134
0.3848	0.0118
0.3867	0.0096
0.3887	0.00888
0.3906	0.00828
0.3926	0.00607
0.3945	0.00141
0.3965	-0.00181
0.3984	-0.00346
0.4004	-0.003
0.4023	-0.00257
0.4043	-0.00326
0.4063	-0.0033
0.4082	-0.0018
0.4102	-9.88e-05
0.4121	0.00132
0.4141	0.00175
0.416	0.00208
0.418	0.00416
0.4199	0.00557
0.4219	0.00513
0.4238	0.00338
0.4258	0.0013
0.4277	-0.000769
0.4297	-0.00356
0.4316	-0.0101
0.4336	-0.0165
0.4355	-0.0209
0.4375	-0.0203
0.4395	-0.0166
0.4414	-0.0127
0.4434	-0.0106
0.4453	-0.00909
0.4473	-0.00752
0.4492	-0.00692
0.4512	-0.00559
0.4531	-0.00398
0.4551	-0.00151
0.457	0.000911
0.459	1.79e-06
0.4609	-0.00436
0.4629	-0.00983
0.4648	-0.0131
0.4668	-0.00885
0.4688	-0.00113
0.4707	0.00612
0.4727	0.00866
0.4746	0.00788
0.4766	0.00664
0.4785	0.00724
0.4805	0.00816
0.4824	0.00858
0.4844	0.00863
0.4863	0.00862
0.4883	0.00883
0.4902	0.00706
0.4922	0.00354
0.4941	-0.00121
0.4961	-0.00297
0.498	-0.00317
0.5	-0.000299
0.502	0.00252
0.5039	0.00296
0.5059	0.00309
0.5078	0.00269
0.5098	0.00257
0.5117	0.00164
0.5137	7.27e-05
0.5156	-0.00077
0.5176	-0.00189
0.5195	-0.00341
0.5215	-0.00769
0.5234	-0.0126
0.5254	-0.0147
0.5273	-0.0144
0.5293	-0.0135
0.5313	-0.0131
0.5332	-0.012
0.5352	-0.00978
0.5371	-0.0068
0.5391	-0.00402
0.541	-0.00123
0.543	-0.0014
0.5449	-0.00139
0.5469	-0.00189
0.5488	-0.00233
0.5508	-0.00403
0.5527	-0.00457
0.5547	-0.00329
0.5566	0.00125
0.5586	0.00774
0.5605	0.0141
0.5625	0.0161
0.5645	0.0133
0.5664	0.0101
0.5684	0.00708
0.5703	0.00463
0.5723	7.7e-05
0.5742	-0.00389
0.5762	-0.00386
0.5781	-0.00185
0.5801	0.000132
0.582	-0.000467
0.584	-0.000745
0.5859	0.00145
0.5879	0.00468
0.5898	0.00578
0.5918	0.00344
0.5938	0.000649
0.5957	-0.00276
0.5977	-0.0085
0.5996	-0.0164
0.6016	-0.022
0.6035	-0.022
0.6055	-0.0166
0.6074	-0.0087
0.6094	-0.00176
0.6113	-0.000357
0.6133	-0.00289
0.6152	-0.00561
0.6172	-0.00757
0.6191	-0.00821
0.6211	-0.00707
0.623	-0.00455
0.625	0.000702
0.627	0.00582
0.6289	0.00753
0.6309	0.00804
0.6328	0.00942
0.6348	0.0112
0.6367	0.0109
0.6387	0.0089
0.6406	0.00697
0.6426	0.00521
0.6445	0.00399
0.6465	0.00331
0.6484	0.000477
0.6504	-1.5e-05
0.6523	-0.00108
0.6543	-0.00061
0.6563	0.00123
0.6582	0.00206
0.6602	0.00143
0.6621	0.00058
0.6641	-0.00179
0.666	-0.00653
0.668	-0.0114
0.6699	-0.0147
0.6719	-0.0156
0.6738	-0.0178
0.6758	-0.0174
0.6777	-0.0133
0.6797	-0.0058
0.6816	0.00256
0.6836	0.00478
0.6855	0.00229
0.6875	-0.003
0.6895	-0.00891
0.6914	-0.0112
0.6934	-0.00777
0.6953	0.000317
0.6973	0.0125
0.6992	0.0226
0.7012	0.0227
0.7031	0.0136
0.7051	0.00344
0.707	-0.00323
0.709	-0.00459
0.7109	-0.00298
0.7129	-0.000518
0.7148	0.00253
0.7168	0.00494
0.7188	0.0072
0.7207	0.00552
0.7227	0.00148
0.7246	-0.00346
0.7266	-0.00523
0.7285	-0.00553
0.7305	-0.00908
0.7324	-0.015
0.7344	-0.0178
0.7363	-0.016
0.7383	-0.0106
0.7402	-0.00578
0.7422	-0.00354
0.7441	-0.00522
0.7461	-0.00577
0.748	-0.00529
0.75	-0.00533
0.752	-0.0058
0.7539	-0.00181
0.7559	0.00523
0.7578	0.0102
0.7598	0.0132
0.7617	0.0133
0.7637	0.0115
0.7656	0.00938
0.7676	0.00662
0.7695	0.00206
0.7715	-0.000916
0.7734	-0.000153
0.7754	0.00235
0.7773	0.00219
0.7793	6.41e-05
0.7813	-0.00142
0.7832	-0.00161
0.7852	-0.00159
0.7871	-0.00178
0.7891	-0.00424
0.791	-0.00862
0.793	-0.0116
0.7949	-0.0159
0.7969	-0.0207
0.7988	-0.0205
0.8008	-0.0124
0.8027	-0.00111
0.8047	0.00663
0.8066	0.00594
0.8086	0.000144
0.8105	-0.00834
0.8125	-0.0128
0.8145	-0.00951
0.8164	0.0016
0.8184	0.0178
0.8203	0.027
0.8223	0.0233
0.8242	0.011
0.8262	-0.000672
0.8281	-0.00658
0.8301	-0.0069
0.832	-0.00362
0.834	0.000565
0.8359	0.00601
0.8379	0.0124
0.8398	0.0114
0.8418	0.00301
0.8438	-0.00896
0.8457	-0.0171
0.8477	-0.0208
0.8496	-0.0177
0.8516	-0.0107
0.8535	-0.00464
0.8555	-0.00182
0.8574	-0.00509
0.8594	-0.00909
0.8613	-0.0122
0.8633	-0.0102
0.8652	-0.00466
0.8672	0.00112
0.8691	0.00738
0.8711	0.00846
0.873	0.00794
0.875	0.00949
0.877	0.0111
0.8789	0.0115
0.8809	0.00839
0.8828	0.00362
0.8848	-0.000732
0.8867	0.000638
0.8887	0.000591
0.8906	-0.00216
0.8926	-0.00343
0.8945	-0.000495
0.8965	0.0014
0.8984	0.00142
0.9004	-0.00278
0.9023	-0.0103
0.9043	-0.0152
0.9063	-0.0185
0.9082	-0.0205
0.9102	-0.0171
0.9121	-0.00713
0.9141	0.00363
0.916	0.00679
0.918	0.00265
0.9199	-0.00658
0.9219	-0.0107
0.9238	-0.00783
0.9258	0.000369
0.9277	0.0151
0.9297	0.0257
0.9316	0.0259
0.9336	0.0159
0.9355	0.000733
0.9375	-0.00936
0.9395	-0.0104
0.9414	-0.00323
0.9434	0.00344
0.9453	0.00915
0.9473	0.011
0.9492	0.00695
0.9512	-0.00366
0.9531	-0.0158
0.9551	-0.0254
0.957	-0.0224
0.959	-0.0135
0.9609	-0.00441
0.9629	-0.00182
0.9648	-0.00424
0.9668	-0.00655
0.9688	-0.00865
0.9707	-0.00745
0.9727	-0.00496
0.9746	0.00137
0.9766	0.00764
0.9785	0.0127
0.9805	0.017
0.9824	0.0145
0.9844	0.00908
0.9863	0.00351
0.9883	-0.000285
0.9902	8.59e-06
0.9922	0.0014
0.9941	0.000342
0.9961	0.000632
0.998	0.00215
1	0.00223
1.002	-0.000563
1.0039	-0.00553
1.0059	-0.0146
1.0078	-0.0181
1.0098	-0.0192
1.0117	-0.0165
1.0137	-0.0103
1.0156	-0.00305
1.0176	0.0014
1.0195	-0.000875
1.0215	-0.00584
1.0234	-0.00876
1.0254	-0.0034
1.0273	0.00492
1.0293	0.0145
1.0313	0.0215
1.0332	0.021
1.0352	0.0142
1.0371	0.00312
1.0391	-0.00703
1.041	-0.00777
1.043	-0.00288
1.0449	0.00329
1.0469	0.00725
1.0488	0.00522
1.0508	-0.0016
1.0527	-0.0093
1.0547	-0.0168
1.0566	-0.0174
1.0586	-0.0158
1.0605	-0.013
1.0625	-0.0106
1.0645	-0.00716
1.0664	-0.00392
1.0684	-0.00261
1.0703	-0.00283
1.0723	-0.00284
1.0742	5.66e-05
1.0762	0.0038
1.0781	0.0117
1.0801	0.0169
1.082	0.0171
1.084	0.0118
1.0859	0.00378
1.0879	-0.00135
1.0898	-0.00184
1.0918	-0.00248
1.0938	-0.000658
1.0957	0.003
1.0977	0.00483
1.0996	0.0012
1.1016	-0.00715
1.1035	-0.0201
1.1055	-0.0225
1.1074	-0.0187
1.1094	-0.00943
1.1113	-0.00128
1.1133	0.00117
1.1152	-0.00241
1.1172	-0.00616
1.1191	-0.0075
1.1211	-0.00271
1.123	0.00484
1.125	0.0137
1.127	0.0211
1.1289	0.0206
1.1309	0.0144
1.1328	0.00185
1.1348	-0.00705
1.1367	-0.00697
1.1387	-0.00193
1.1406	0.00361
1.1426	0.00537
1.1445	0.000604
1.1465	-0.0053
1.1484	-0.0101
1.1504	-0.0142
1.1523	-0.0153
1.1543	-0.0183
1.1563	-0.0176
1.1582	-0.0105
1.1602	-0.000421
1.1621	0.00417
1.1641	0.00171
1.166	-0.00186
1.168	-0.00285
1.1699	0.000817
1.1719	0.01
1.1738	0.0188
1.1758	0.0202
1.1777	0.0141
1.1797	0.0039
1.1816	-0.00286
1.1836	-0.00507
1.1855	-0.00414
1.1875	6.01e-05
1.1895	0.00162
1.1914	-0.000416
1.1934	-0.00591
1.1953	-0.0154
1.1973	-0.0184
1.1992	-0.0173
1.2012	-0.0134
1.2031	-0.00833
1.2051	-0.00501
1.207	-0.00191
1.209	-0.000654
1.2109	0.00165
1.2129	0.00473
1.2148	0.00771
1.2168	0.0124
1.2188	0.0142
1.2207	0.0122
1.2227	0.00853
1.2246	0.00357
1.2266	0.00174
1.2285	4.44e-05
1.2305	-0.00197
1.2324	-0.00366
1.2344	-0.00593
1.2363	-0.00504
1.2383	-0.00684
1.2402	-0.00915
1.2422	-0.0123
1.2441	-0.0172
1.2461	-0.0186
1.248	-0.012
1.25	-0.0026
1.252	0.00183
1.2539	0.00185
1.2559	0.00324
1.2578	0.00638
1.2598	0.0117
1.2617	0.016
1.2637	0.0154
1.2656	0.00997
1.2676	0.00225
1.2695	-0.000181
1.2715	-7.45e-05
1.2734	0.000919
1.2754	0.000394
1.2773	-0.00479
1.2793	-0.0109
1.2813	-0.0157
1.2832	-0.014
1.2852	-0.00937
1.2871	-0.00827
1.2891	-0.0109
1.291	-0.013
1.293	-0.0106
1.2949	-0.0052
1.2969	0.00248
1.2988	0.0092
1.3008	0.0127
1.3027	0.0161
1.3047	0.0138
1.3066	0.00995
1.3086	0.0043
1.3105	0.00126
1.3125	0.00196
1.3145	0.00113
1.3164	0.000232
1.3184	-0.00148
1.3203	-0.00362
1.3223	-0.0084
1.3242	-0.0151
1.3262	-0.018
1.3281	-0.0166
1.3301	-0.0108
1.332	-0.00482
1.334	-0.00147
1.3359	-0.0042
1.3379	-0.00491
1.3398	0.00125
1.3418	0.0102
1.3438	0.0185
1.3457	0.0198
1.3477	0.0154
1.3496	0.00704
1.3516	-0.000297
1.3535	-0.00238
1.3555	-0.00207
1.3574	0.00133
1.3594	-0.00112
1.3613	-0.00757
1.3633	-0.0147
1.3652	-0.0145
1.3672	-0.00914
1.3691	-0.00889
1.3711	-0.0136
1.373	-0.0162
1.375	-0.00988
1.377	-0.000765
1.3789	0.00719
1.3809	0.00866
1.3828	0.00965
1.3848	0.0134
1.3867	0.0169
1.3887	0.0151
1.3906	0.00528
1.3926	-0.00338
1.3945	-0.00467
1.3965	0.00141
1.3984	0.00592
1.4004	0.000984
1.4023	-0.011
1.4043	-0.022
1.4063	-0.0207
1.4082	-0.0131
1.4102	-0.00687
1.4121	-0.0052
1.4141	-0.00566
1.416	-0.00578
1.418	-0.00304
1.4199	0.00415
1.4219	0.0116
1.4238	0.0189
1.4258	0.018
1.4277	0.0131
1.4297	0.00476
1.4316	0.00102
1.4336	-0.000398
1.4355	-0.000614
1.4375	-0.003
1.4395	-0.01
1.4414	-0.0139
1.4434	-0.0132
1.4453	-0.0065
1.4473	-0.00732
1.4492	-0.015
1.4512	-0.018
1.4531	-0.011
1.4551	-0.00166
1.457	0.00498
1.459	0.00843
1.4609	0.0139
1.4629	0.0223
1.4648	0.0234
1.4668	0.0125
1.4688	-0.00508
1.4707	-0.0125
1.4727	-0.00647
1.4746	0.00706
1.4766	0.00767
1.4785	-0.00552
1.4805	-0.0223
1.4824	-0.0236
1.4844	-0.013
1.4863	-0.00629
1.4883	-0.00822
1.4902	-0.0118
1.4922	-0.00914
1.4941	0.00294
1.4961	0.0135
1.498	0.0158
1.5	0.0132
1.502	0.0102
1.5039	0.0123
1.5059	0.012
1.5078	0.00603
1.5098	-0.00438
1.5117	-0.00842
1.5137	-0.00771
1.5156	-0.00666
1.5176	-0.0114
1.5195	-0.0147
1.5215	-0.0139
1.5234	-0.01
1.5254	-0.00642
1.5273	-0.00625
1.5293	-0.00923
1.5313	-0.00432
1.5332	0.00734
1.5352	0.0213
1.5371	0.028
1.5391	0.0229
1.541	0.00835
1.543	-0.0049
1.5449	-0.00929
1.5469	-0.00393
1.5488	0.0022
1.5508	-0.00235
1.5527	-0.0136
1.5547	-0.0199
1.5566	-0.0117
1.5586	-0.00594
1.5605	-0.00988
1.5625	-0.0165
1.5645	-0.0143
1.5664	0.000368
1.5684	0.0161
1.5703	0.0197
1.5723	0.0149
1.5742	0.0117
1.5762	0.0146
1.5781	0.0135
1.5801	0.00411
1.582	-0.0096
1.584	-0.0125
1.5859	-0.00559
1.5879	-0.00199
1.5898	-0.0103
1.5918	-0.019
1.5938	-0.0195
1.5957	-0.00955
1.5977	-0.000851
1.5996	-0.00487
1.6016	-0.0102
1.6035	-0.000794
1.6055	0.02
1.6074	0.0334
1.6094	0.0244
1.6113	0.00408
1.6133	-0.00708
1.6152	-0.0024
1.6172	0.00637
1.6191	0.00257
1.6211	-0.0133
1.623	-0.0255
1.625	-0.0194
1.627	-0.00158
1.6289	0.000487
1.6309	-0.0135
1.6328	-0.0206
1.6348	-0.0119
1.6367	0.00624
1.6387	0.0143
1.6406	0.0124
1.6426	0.0149
1.6445	0.0236
1.6465	0.0252
1.6484	0.00842
1.6504	-0.0148
1.6523	-0.0217
1.6543	-0.0113
1.6563	-0.00276
1.6582	-0.00833
1.6602	-0.0176
1.6621	-0.0154
1.6641	-0.00564
1.666	-0.000869
1.668	-0.0111
1.6699	-0.0175
1.6719	-0.00172
1.6738	0.0267
1.6758	0.0398
1.6777	0.0252
1.6797	0.00137
1.6816	-0.00608
1.6836	0.000768
1.6855	0.00419
1.6875	-0.00811
1.6895	-0.024
1.6914	-0.0252
1.6934	-0.00783
1.6953	0.00585
1.6973	-0.00377
1.6992	-0.019
1.7012	-0.0194
1.7031	-0.0032
1.7051	0.0126
1.707	0.0166
1.709	0.0171
1.7109	0.0235
1.7129	0.0268
1.7148	0.0136
1.7168	-0.0114
1.7188	-0.0242
1.7207	-0.0185
1.7227	-0.00904
1.7246	-0.00979
1.7266	-0.0116
1.7285	-0.0092
1.7305	-0.00405
1.7324	-0.00562
1.7344	-0.0159
1.7363	-0.0143
1.7383	0.00753
1.7402	0.0322
1.7422	0.0369
1.7441	0.0223
1.7461	0.006
1.748	-0.00134
1.75	-0.00562
1.752	-0.0123
1.7539	-0.0204
1.7559	-0.0237
1.7578	-0.0125
1.7598	0.00196
1.7617	0.00317
1.7637	-0.0061
1.7656	-0.0179
1.7676	-0.0166
1.7695	-1.25e-05
1.7715	0.0203
1.7734	0.0315
1.7754	0.0305
1.7773	0.0209
1.7793	0.00694
1.7813	-0.008
1.7832	-0.0188
1.7852	-0.0261
1.7871	-0.0278
1.7891	-0.0168
1.791	0.00361
1.793	0.00964
1.7949	-0.00105
1.7969	-0.0181
1.7988	-0.0224
1.8008	-0.0063
1.8027	0.0146
1.8047	0.0302
1.8066	0.035
1.8086	0.0307
1.8105	0.0177
1.8125	-0.00643
1.8145	-0.0268
1.8164	-0.0365
1.8184	-0.0327
1.8203	-0.0162
1.8223	0.00445
1.8242	0.0147
1.8262	0.00859
1.8281	-0.0116
1.8301	-0.026
1.832	-0.0163
1.834	0.0103
1.8359	0.0316
1.8379	0.0365
1.8398	0.0302
1.8418	0.0174
1.8438	-0.00141
1.8457	-0.0257
1.8477	-0.0462
1.8496	-0.0465
1.8516	-0.0185
1.8535	0.0141
1.8555	0.024
1.8574	0.0104
1.8594	-0.0114
1.8613	-0.0204
1.8633	-0.0133
1.8652	0.00388
1.8672	0.024
1.8691	0.0394
1.8711	0.0388
1.873	0.0189
1.875	-0.00987
1.877	-0.038
1.8789	-0.0556
1.8809	-0.0469
1.8828	-0.0138
1.8848	0.0193
1.8867	0.0308
1.8887	0.0123
1.8906	-0.0106
1.8926	-0.0162
1.8945	-0.0055
1.8965	0.00717
1.8984	0.0192
1.9004	0.0322
1.9023	0.0359
1.9043	0.0169
1.9063	-0.0189
1.9082	-0.0525
1.9102	-0.0575
1.9121	-0.0305
1.9141	0.00123
1.916	0.0216
1.918	0.0227
1.9199	0.0128
1.9219	-0.000463
1.9238	-0.0093
1.9258	-0.00734
1.9277	0.00867
1.9297	0.0261
1.9316	0.03
1.9336	0.0167
1.9355	-0.00928
1.9375	-0.0392
1.9395	-0.0518
1.9414	-0.0372
1.9434	-0.0121
1.9453	0.0104
1.9473	0.0197
1.9492	0.0195
1.9512	0.0136
1.9531	0.00292
1.9551	-0.00432
1.957	0.00141
1.959	0.0176
1.9609	0.0231
1.9629	0.0111
1.9648	-0.0133
1.9668	-0.0354
1.9688	-0.0383
1.9707	-0.0264
1.9727	-0.0111
1.9746	0.00257
1.9766	0.0116
1.9785	0.02
1.9805	0.0215
1.9824	0.0128
1.9844	0.00143
1.9863	0.00222
1.9883	0.0113
1.9902	0.0133
1.9922	-0.00158
1.9941	-0.0254
1.9961	-0.0374
1.998	-0.0239
2	-0.00956
2.002	-0.00397
2.0039	-0.00373
2.0059	0.00672
2.0078	0.0203
2.0098	0.0215
2.0117	0.0115
2.0137	0.00775
2.0156	0.0137
2.0176	0.013
2.0195	-0.000779
2.0215	-0.0257
2.0234	-0.042
2.0254	-0.0326
2.0273	-0.0104
2.0293	0.0026
2.0313	0.00369
2.0332	0.00242
2.0352	0.0105
2.0371	0.0188
2.0391	0.0138
2.041	0.00669
2.043	0.00968
2.0449	0.0174
2.0469	0.011
2.0488	-0.0133
2.0508	-0.0409
2.0527	-0.0411
2.0547	-0.0203
2.0566	-0.000601
2.0586	0.00714
2.0605	0.00883
2.0625	0.0147
2.0645	0.0186
2.0664	0.0138
2.0684	0.00667
2.0703	0.00592
2.0723	0.00932
2.0742	0.00684
2.0762	-0.0108
2.0781	-0.0346
2.0801	-0.0384
2.082	-0.0212
2.084	-0.00431
2.0859	0.00282
2.0879	0.00583
2.0898	0.0158
2.0918	0.0235
2.0938	0.0183
2.0957	0.00815
2.0977	0.00755
2.0996	0.009
2.1016	0.0019
2.1035	-0.0183
2.1055	-0.0373
2.1074	-0.0335
2.1094	-0.0154
2.1113	-7.88e-05
2.1133	0.00527
2.1152	0.00716
2.1172	0.0156
2.1191	0.0214
2.1211	0.0169
2.123	0.00957
2.125	0.00736
2.127	0.00656
2.1289	-0.00326
2.1309	-0.0252
2.1328	-0.0404
2.1348	-0.0295
2.1367	-0.0116
2.1387	0.00282
2.1406	0.00648
2.1426	0.0134
2.1445	0.0205
2.1465	0.0186
2.1484	0.0119
2.1504	0.0111
2.1523	0.01
2.1543	0.00161
2.1563	-0.0174
2.1582	-0.0372
2.1602	-0.0361
2.1621	-0.0192
2.1641	-0.00362
2.166	0.00337
2.168	0.00911
2.1699	0.0202
2.1719	0.0238
2.1738	0.0149
2.1758	0.00667
2.1777	0.0088
2.1797	0.00701
2.1816	-0.00652
2.1836	-0.0313
2.1855	-0.0397
2.1875	-0.0237
2.1895	-0.00658
2.1914	0.00288
2.1934	0.00773
2.1953	0.0174
2.1973	0.0226
2.1992	0.0174
2.2012	0.0103
2.2031	0.00839
2.2051	0.00583
2.207	-0.0052
2.209	-0.0277
2.2109	-0.0402
2.2129	-0.0294
2.2148	-0.0107
2.2168	6.98e-05
2.2188	0.00595
2.2207	0.0184
2.2227	0.0266
2.2246	0.0204
2.2266	0.00927
2.2285	0.00806
2.2305	0.00778
2.2324	-0.00461
2.2344	-0.0283
2.2363	-0.0406
2.2383	-0.0287
2.2402	-0.00848
2.2422	0.00282
2.2441	0.00667
2.2461	0.0172
2.248	0.0248
2.25	0.0202
2.252	0.0102
2.2539	0.00584
2.2559	0.00473
2.2578	-0.00532
2.2598	-0.0284
2.2617	-0.0404
2.2637	-0.0279
2.2656	-0.00988
2.2676	0.00116
2.2695	0.00787
2.2715	0.0218
2.2734	0.0286
2.2754	0.0204
2.2773	0.0101
2.2793	0.00788
2.2813	0.00404
2.2832	-0.0127
2.2852	-0.0375
2.2871	-0.0414
2.2891	-0.0229
2.291	-0.00206
2.293	0.00589
2.2949	0.0113
2.2969	0.0244
2.2988	0.0269
2.3008	0.0157
2.3027	0.00622
2.3047	0.004
2.3066	0.000195
2.3086	-0.0177
2.3105	-0.0388
2.3125	-0.0348
2.3145	-0.0176
2.3164	-0.000813
2.3184	0.0082
2.3203	0.02
2.3223	0.0281
2.3242	0.0237
2.3262	0.0135
2.3281	0.00668
2.3301	0.00162
2.332	-0.0121
2.334	-0.0353
2.3359	-0.0407
2.3379	-0.0242
2.3398	-0.00571
2.3418	0.00344
2.3438	0.0121
2.3457	0.0259
2.3477	0.0287
2.3496	0.0172
2.3516	0.00918
2.3535	0.00633
2.3555	-0.00284
2.3574	-0.0254
2.3594	-0.0428
2.3613	-0.0335
2.3633	-0.0133
2.3652	0.00326
2.3672	0.0133
2.3691	0.0259
2.3711	0.03
2.373	0.02
2.375	0.00903
2.377	0.00433
2.3789	-0.00207
2.3809	-0.0203
2.3828	-0.0404
2.3848	-0.035
2.3867	-0.0158
2.3887	-0.00179
2.3906	0.00719
2.3926	0.0211
2.3945	0.0322
2.3965	0.0246
2.3984	0.0129
2.4004	0.00783
2.4023	0.00133
2.4043	-0.0183
2.4063	-0.0424
2.4082	-0.0425
2.4102	-0.0218
2.4121	-0.000341
2.4141	0.0107
2.416	0.0233
2.418	0.0335
2.4199	0.026
2.4219	0.0124
2.4238	0.00411
2.4258	-0.00284
2.4277	-0.0182
2.4297	-0.0392
2.4316	-0.0371
2.4336	-0.0192
2.4355	-0.0023
2.4375	0.00833
2.4395	0.0223
2.4414	0.0319
2.4434	0.0246
2.4453	0.0138
2.4473	0.00902
2.4492	0.00205
2.4512	-0.0201
2.4531	-0.0454
2.4551	-0.0434
2.457	-0.0213
2.459	-0.00149
2.4609	0.0114
2.4629	0.0274
2.4648	0.0373
2.4668	0.0262
2.4688	0.0105
2.4707	0.00236
2.4727	-0.00619
2.4746	-0.025
2.4766	-0.043
2.4785	-0.0346
2.4805	-0.0136
2.4824	0.00343
2.4844	0.014
2.4863	0.0277
2.4883	0.0317
2.4902	0.0211
2.4922	0.0127
2.4941	0.00707
2.4961	-0.00614
2.498	-0.0332
2.5	-0.0497
2.502	-0.0352
2.5039	-0.0118
2.5059	0.00524
2.5078	0.0197
2.5098	0.0355
2.5117	0.0347
2.5137	0.0186
2.5156	0.007
2.5176	-0.000845
2.5195	-0.0161
2.5215	-0.0399
2.5234	-0.0446
2.5254	-0.0253
2.5273	-0.00358
2.5293	0.00958
2.5313	0.0245
2.5332	0.0368
2.5352	0.0286
2.5371	0.0154
2.5391	0.00555
2.541	-0.00446
2.543	-0.0256
2.5449	-0.0467
2.5469	-0.0386
2.5488	-0.0166
2.5508	0.00239
2.5527	0.0166
2.5547	0.0337
2.5566	0.0367
2.5586	0.0229
2.5605	0.0102
2.5625	0.00208
2.5645	-0.0128
2.5664	-0.0397
2.5684	-0.0482
2.5703	-0.0296
2.5723	-0.00693
2.5742	0.00781
2.5762	0.0243
2.5781	0.0386
2.5801	0.0311
2.582	0.0151
2.584	0.00539
2.5859	-0.00475
2.5879	-0.0262
2.5898	-0.0474
2.5918	-0.04
2.5938	-0.0164
2.5957	0.00381
2.5977	0.0192
2.5996	0.0361
2.6016	0.0361
2.6035	0.0204
2.6055	0.00817
2.6074	0.000775
2.6094	-0.0165
2.6113	-0.0423
2.6133	-0.0462
2.6152	-0.0259
2.6172	-0.0051
2.6191	0.0101
2.6211	0.0285
2.623	0.04
2.625	0.0295
2.627	0.0146
2.6289	0.00539
2.6309	-0.00739
2.6328	-0.0349
2.6348	-0.052
2.6367	-0.038
2.6387	-0.0119
2.6406	0.00842
2.6426	0.0269
2.6445	0.043
2.6465	0.0356
2.6484	0.0187
2.6504	0.00592
2.6523	-0.00752
2.6543	-0.0319
2.6563	-0.0513
2.6582	-0.0397
2.6602	-0.0143
2.6621	0.00563
2.6641	0.0218
2.666	0.0384
2.668	0.0358
2.6699	0.0195
2.6719	0.00813
2.6738	-0.00023
2.6758	-0.0211
2.6777	-0.0478
2.6797	-0.0466
2.6816	-0.0231
2.6836	-0.00158
2.6855	0.0152
2.6875	0.0359
2.6895	0.0426
2.6914	0.0284
2.6934	0.0128
2.6953	-0.00243
2.6973	-0.0227
2.6992	-0.0489
2.7012	-0.0488
2.7031	-0.025
2.7051	-0.00119
2.707	0.0191
2.709	0.04
2.7109	0.0433
2.7129	0.024
2.7148	0.00664
2.7168	-0.0015
2.7188	-0.0172
2.7207	-0.044
2.7227	-0.0479
2.7246	-0.0267
2.7266	-0.00459
2.7285	0.0134
2.7305	0.0335
2.7324	0.0431
2.7344	0.0299
2.7363	0.0154
2.7383	0.00229
2.7402	-0.0187
2.7422	-0.0478
2.7441	-0.0525
2.7461	-0.0294
2.748	-0.00449
2.75	0.0172
2.752	0.0408
2.7539	0.0466
2.7559	0.0277
2.7578	0.0108
2.7598	-0.00297
2.7617	-0.0231
2.7637	-0.0507
2.7656	-0.0502
2.7676	-0.0248
2.7695	-0.000327
2.7715	0.0205
2.7734	0.0416
2.7754	0.0439
2.7773	0.0258
2.7793	0.00873
2.7813	-0.00449
2.7832	-0.0262
2.7852	-0.0517
2.7871	-0.0472
2.7891	-0.0227
2.791	0.000469
2.793	0.0214
2.7949	0.0435
2.7969	0.0417
2.7988	0.0239
2.8008	0.00883
2.8027	-0.00599
2.8047	-0.0321
2.8066	-0.0557
2.8086	-0.0458
2.8105	-0.0181
2.8125	0.00667
2.8145	0.0315
2.8164	0.0512
2.8184	0.041
2.8203	0.0186
2.8223	0.00247
2.8242	-0.0147
2.8262	-0.0438
2.8281	-0.0573
2.8301	-0.0375
2.832	-0.00929
2.834	0.0145
2.8359	0.0379
2.8379	0.0495
2.8398	0.0334
2.8418	0.0131
2.8438	-0.0015
2.8457	-0.022
2.8477	-0.0506
2.8496	-0.0532
2.8516	-0.0282
2.8535	-0.00174
2.8555	0.0225
2.8574	0.0472
2.8594	0.0474
2.8613	0.0261
2.8633	0.00897
2.8652	-0.00726
2.8672	-0.0358
2.8691	-0.0598
2.8711	-0.0473
2.873	-0.0188
2.875	0.00932
2.877	0.0362
2.8789	0.0545
2.8809	0.0423
2.8828	0.0187
2.8848	-0.000689
2.8867	-0.0221
2.8887	-0.0532
2.8906	-0.0587
2.8926	-0.0327
2.8945	-0.00363
2.8965	0.0223
2.8984	0.0497
2.9004	0.0508
2.9023	0.0274
2.9043	0.00729
2.9063	-0.0102
2.9082	-0.037
2.9102	-0.0599
2.9121	-0.047
2.9141	-0.0166
2.916	0.0114
2.918	0.0409
2.9199	0.0579
2.9219	0.0409
2.9238	0.0146
2.9258	-0.00395
2.9277	-0.0264
2.9297	-0.057
2.9316	-0.0569
2.9336	-0.0298
2.9355	2.94e-05
2.9375	0.0293
2.9395	0.055
2.9414	0.0509
2.9434	0.0261
2.9453	0.00365
2.9473	-0.0179
2.9492	-0.0495
2.9512	-0.0636
2.9531	-0.0404
2.9551	-0.00835
2.957	0.0208
2.959	0.0525
2.9609	0.0582
2.9629	0.033
2.9648	0.00838
2.9668	-0.0119
2.9688	-0.0414
2.9707	-0.0648
2.9727	-0.0505
2.9746	-0.0194
2.9766	0.0142
2.9785	0.0472
2.9805	0.0629
2.9824	0.0432
2.9844	0.0143
2.9863	-0.00832
2.9883	-0.0373
2.9902	-0.0657
2.9922	-0.0573
2.9941	-0.0242
2.9961	0.00793
2.998	0.043
3	0.0652
3.002	0.0475
3.0039	0.0184
3.0059	-0.00628
3.0078	-0.033
3.0098	-0.0632
3.0117	-0.061
3.0137	-0.0301
3.0156	0.00491
3.0176	0.0422
3.0195	0.0681
3.0215	0.0541
3.0234	0.0205
3.0254	-0.00573
3.0273	-0.0327
3.0293	-0.0647
3.0313	-0.0635
3.0332	-0.0321
3.0352	0.00231
3.0371	0.0394
3.0391	0.0669
3.041	0.0552
3.043	0.0235
3.0449	-0.00269
3.0469	-0.0313
3.0488	-0.0647
3.0508	-0.0662
3.0527	-0.0338
3.0547	0.0027
3.0566	0.0414
3.0586	0.0717
3.0605	0.057
3.0625	0.0229
3.0645	-0.00489
3.0664	-0.0351
3.0684	-0.069
3.0703	-0.0669
3.0723	-0.034
3.0742	0.00443
3.0762	0.0469
3.0781	0.0748
3.0801	0.0595
3.082	0.0218
3.084	-0.00973
3.0859	-0.0428
3.0879	-0.0739
3.0898	-0.0662
3.0918	-0.0273
3.0938	0.0106
3.0957	0.054
3.0977	0.0771
3.0996	0.0534
3.1016	0.0163
3.1035	-0.0151
3.1055	-0.0488
3.1074	-0.0756
3.1094	-0.0612
3.1113	-0.0227
3.1133	0.0192
3.1152	0.0643
3.1172	0.0807
3.1191	0.0508
3.1211	0.00913
3.123	-0.0245
3.125	-0.0614
3.127	-0.0792
3.1289	-0.0535
3.1309	-0.0135
3.1328	0.0295
3.1348	0.0738
3.1367	0.0768
3.1387	0.0407
3.1406	0.00136
3.1426	-0.0357
3.1445	-0.0716
3.1465	-0.0779
3.1484	-0.0428
3.1504	-0.000915
3.1523	0.0462
3.1543	0.0849
3.1563	0.072
3.1582	0.0274
3.1602	-0.012
3.1621	-0.0511
3.1641	-0.0819
3.166	-0.0696
3.168	-0.0317
3.1699	0.0128
3.1719	0.0655
3.1738	0.0907
3.1758	0.0621
3.1777	0.0133
3.1797	-0.0292
3.1816	-0.0707
3.1836	-0.0872
3.1855	-0.0558
3.1875	-0.0119
3.1895	0.0364
3.1914	0.0865
3.1934	0.085
3.1953	0.0417
3.1973	-0.00728
3.1992	-0.0523
3.2012	-0.0855
3.2031	-0.0774
3.2051	-0.0366
3.207	0.00978
3.209	0.0652
3.2109	0.098
3.2129	0.0727
3.2148	0.0175
3.2168	-0.0325
3.2188	-0.0786
3.2207	-0.0924
3.2227	-0.0568
3.2246	-0.0116
3.2266	0.0386
3.2285	0.0892
3.2305	0.0913
3.2324	0.0476
3.2344	-0.00806
3.2363	-0.0623
3.2383	-0.0977
3.2402	-0.0813
3.2422	-0.0307
3.2441	0.0186
3.2461	0.0753
3.248	0.103
3.25	0.071
3.252	0.0141
3.2539	-0.0441
3.2559	-0.0947
3.2578	-0.0973
3.2598	-0.0514
3.2617	0.000726
3.2637	0.0567
3.2656	0.101
3.2676	0.0918
3.2695	0.0384
3.2715	-0.0241
3.2734	-0.0852
3.2754	-0.111
3.2773	-0.0737
3.2793	-0.0133
3.2813	0.0428
3.2832	0.0983
3.2852	0.103
3.2871	0.0568
3.2891	-0.00553
3.291	-0.0727
3.293	-0.115
3.2949	-0.0927
3.2969	-0.0311
3.2988	0.0314
3.3008	0.0921
3.3027	0.115
3.3047	0.0745
3.3066	0.00924
3.3086	-0.0605
3.3105	-0.118
3.3125	-0.11
3.3145	-0.0459
3.3164	0.0203
3.3184	0.0869
3.3203	0.118
3.3223	0.0863
3.3242	0.0241
3.3262	-0.0492
3.3281	-0.115
3.3301	-0.123
3.332	-0.0626
3.334	0.0108
3.3359	0.0845
3.3379	0.127
3.3398	0.0988
3.3418	0.0322
3.3438	-0.0418
3.3457	-0.114
3.3477	-0.131
3.3496	-0.0755
3.3516	0.000393
3.3535	0.0798
3.3555	0.131
3.3574	0.111
3.3594	0.0429
3.3613	-0.038
3.3633	-0.116
3.3652	-0.141
3.3672	-0.0855
3.3691	-0.00362
3.3711	0.0805
3.373	0.139
3.375	0.118
3.377	0.0477
3.3789	-0.0368
3.3809	-0.12
3.3828	-0.148
3.3848	-0.093
3.3867	-0.00704
3.3887	0.0847
3.3906	0.146
3.3926	0.128
3.3945	0.0505
3.3965	-0.04
3.3984	-0.128
3.4004	-0.157
3.4023	-0.0956
3.4043	-0.00491
3.4063	0.0923
3.4082	0.154
3.4102	0.129
3.4121	0.0505
3.4141	-0.0479
3.416	-0.138
3.418	-0.163
3.4199	-0.0957
3.4219	0.00184
3.4238	0.105
3.4258	0.166
3.4277	0.133
3.4297	0.0426
3.4316	-0.0614
3.4336	-0.155
3.4355	-0.165
3.4375	-0.0898
3.4395	0.0132
3.4414	0.12
3.4434	0.173
3.4453	0.131
3.4473	0.0339
3.4492	-0.0803
3.4512	-0.171
3.4531	-0.169
3.4551	-0.0786
3.457	0.033
3.459	0.145
3.4609	0.182
3.4629	0.12
3.4648	0.0144
3.4668	-0.106
3.4688	-0.188
3.4707	-0.164
3.4727	-0.0637
3.4746	0.0597
3.4766	0.169
3.4785	0.189
3.4805	0.108
3.4824	-0.0143
3.4844	-0.139
3.4863	-0.204
3.4883	-0.149
3.4902	-0.037
3.4922	0.094
3.4941	0.193
3.4961	0.183
3.498	0.0849
3.5	-0.0507
3.502	-0.176
3.5039	-0.209
3.5059	-0.129
3.5078	0.000146
3.5098	0.138
3.5117	0.216
3.5137	0.172
3.5156	0.0495
3.5176	-0.0992
3.5195	-0.214
3.5215	-0.204
3.5234	-0.0958
3.5254	0.0482
3.5273	0.184
3.5293	0.224
3.5313	0.147
3.5332	-0.000586
3.5352	-0.16
3.5371	-0.242
3.5391	-0.183
3.541	-0.045
3.543	0.113
3.5449	0.229
3.5469	0.216
3.5488	0.0997
3.5508	-0.0687
3.5527	-0.221
3.5547	-0.248
3.5566	-0.142
3.5586	0.0203
3.5605	0.184
3.5625	0.257
3.5645	0.192
3.5664	0.0334
3.5684	-0.154
3.5703	-0.272
3.5723	-0.225
3.5742	-0.0767
3.5762	0.106
3.5781	0.248
3.5801	0.254
3.582	0.137
3.584	-0.0578
3.5859	-0.242
3.5879	-0.289
3.5898	-0.173
3.5918	0.0144
3.5938	0.204
3.5957	0.291
3.5977	0.224
3.5996	0.0493
3.6016	-0.171
3.6035	-0.312
3.6055	-0.264
3.6074	-0.0904
3.6094	0.128
3.6113	0.288
3.6133	0.291
3.6152	0.15
3.6172	-0.0768
3.6191	-0.287
3.6211	-0.331
3.623	-0.189
3.625	0.034
3.627	0.251
3.6289	0.332
3.6309	0.241
3.6328	0.0307
3.6348	-0.224
3.6367	-0.362
3.6387	-0.286
3.6406	-0.0693
3.6426	0.187
3.6445	0.345
3.6465	0.318
3.6484	0.133
3.6504	-0.134
3.6523	-0.354
3.6543	-0.361
3.6563	-0.177
3.6582	0.0966
3.6602	0.325
3.6621	0.37
3.6641	0.232
3.666	-0.036
3.668	-0.312
3.6699	-0.411
3.6719	-0.273
3.6738	0.00127
3.6758	0.283
3.6777	0.406
3.6797	0.315
3.6816	0.0677
3.6836	-0.247
3.6855	-0.433
3.6875	-0.363
3.6895	-0.105
3.6914	0.221
3.6934	0.417
3.6953	0.386
3.6973	0.16
3.6992	-0.169
3.7012	-0.426
3.7031	-0.429
3.7051	-0.201
3.707	0.14
3.709	0.406
3.7109	0.44
3.7129	0.253
3.7148	-0.0847
3.7168	-0.403
3.7188	-0.485
3.7207	-0.293
3.7227	0.0651
3.7246	0.389
3.7266	0.484
3.7285	0.329
3.7305	-0.00175
3.7324	-0.362
3.7344	-0.517
3.7363	-0.377
3.7383	-0.0261
3.7402	0.352
3.7422	0.513
3.7441	0.401
3.7461	0.0745
3.748	-0.319
3.75	-0.534
3.752	-0.441
3.7539	-0.101
3.7559	0.308
3.7578	0.531
3.7598	0.462
3.7617	0.152
3.7637	-0.269
3.7656	-0.546
3.7676	-0.506
3.7695	-0.178
3.7715	0.269
3.7734	0.546
3.7754	0.512
3.7773	0.21
3.7793	-0.225
3.7813	-0.542
3.7832	-0.547
3.7852	-0.244
3.7871	0.218
3.7891	0.548
3.791	0.559
3.793	0.271
3.7949	-0.188
3.7969	-0.547
3.7988	-0.588
3.8008	-0.293
3.8027	0.19
3.8047	0.554
3.8066	0.594
3.8086	0.315
3.8105	-0.153
3.8125	-0.546
3.8145	-0.622
3.8164	-0.345
3.8184	0.157
3.8203	0.561
3.8223	0.63
3.8242	0.352
3.8262	-0.135
3.8281	-0.548
3.8301	-0.642
3.832	-0.372
3.834	0.135
3.8359	0.562
3.8379	0.655
3.8398	0.385
3.8418	-0.118
3.8438	-0.56
3.8457	-0.673
3.8477	-0.399
3.8496	0.133
3.8516	0.578
3.8535	0.677
3.8555	0.397
3.8574	-0.116
3.8594	-0.565
3.8613	-0.688
3.8633	-0.418
3.8652	0.124
3.8672	0.591
3.8691	0.703
3.8711	0.414
3.873	-0.128
3.875	-0.59
3.877	-0.707
3.8789	-0.416
3.8809	0.143
3.8828	0.612
3.8848	0.716
3.8867	0.41
3.8887	-0.145
3.8906	-0.613
3.8926	-0.725
3.8945	-0.415
3.8965	0.169
3.8984	0.643
3.9004	0.732
3.9023	0.397
[truncated: 2,098 more rows]
