# Supplementary material for: Effect of the Supports’ Positions on the Vibration Characteristics of a Flexible Rotor Shafting
Source: Hindawi journal article supplement (doi:10.1155/2020/1592794), 2020-02-12
Supplement: f1 [file 1592794.f1.zip › 1592794.f1/test_data/Table10_7.xlsx]

## Sheet: Sheet1
Time t/s	vibration deformation amount u/mm
0	0.000805
0.002	0.00119
0.0039	0.00104
0.0059	0.00152
0.0078	0.00162
0.0098	0.00127
0.0117	0.00145
0.0137	0.00182
0.0156	0.00154
0.0176	0.00165
0.0195	0.00204
0.0215	0.00239
0.0234	0.00218
0.0254	0.00198
0.0273	0.00217
0.0293	0.00292
0.0313	0.00272
0.0332	0.00271
0.0352	0.00276
0.0371	0.00276
0.0391	0.00352
0.041	0.00352
0.043	0.00379
0.0449	0.00357
0.0469	0.00371
0.0488	0.004
0.0508	0.0044
0.0527	0.00467
0.0547	0.00477
0.0566	0.00471
0.0586	0.00487
0.0605	0.00507
0.0625	0.00537
0.0645	0.00539
0.0664	0.00546
0.0684	0.00575
0.0703	0.00602
0.0723	0.00635
0.0742	0.0067
0.0762	0.0065
0.0781	0.00688
0.0801	0.00693
0.082	0.00763
0.084	0.00764
0.0859	0.00795
0.0879	0.00792
0.0898	0.00838
0.0918	0.00812
0.0938	0.00821
0.0957	0.0087
0.0977	0.00873
0.0996	0.00874
0.1016	0.00875
0.1035	0.00903
0.1055	0.00867
0.1074	0.0086
0.1094	0.0085
0.1113	0.00872
0.1133	0.00855
0.1152	0.00877
0.1172	0.00854
0.1191	0.00841
0.1211	0.00842
0.123	0.00846
0.125	0.008
0.127	0.00794
0.1289	0.00769
0.1309	0.00778
0.1328	0.00778
0.1348	0.00739
0.1367	0.00738
0.1387	0.00657
0.1406	0.00652
0.1426	0.00656
0.1445	0.00621
0.1465	0.00675
0.1484	0.00643
0.1504	0.00594
0.1523	0.00513
0.1543	0.00544
0.1563	0.00484
0.1582	0.00478
0.1602	0.0041
0.1621	0.00258
0.1641	0.00232
0.166	0.00172
0.168	0.00259
0.1699	0.00302
0.1719	0.00197
0.1738	-7.34e-05
0.1758	-0.00162
0.1777	-0.00267
0.1797	-0.00105
0.1816	-0.000558
0.1836	-0.00159
0.1855	-0.00166
0.1875	-0.00242
0.1895	-0.00237
0.1914	-0.00288
0.1934	-0.00291
0.1953	-0.00434
0.1973	-0.00525
0.1992	-0.00508
0.2012	-0.00504
0.2031	-0.00453
0.2051	-0.00384
0.207	-0.00447
0.209	-0.0048
0.2109	-0.00529
0.2129	-0.00531
0.2148	-0.00532
0.2168	-0.0055
0.2188	-0.00524
0.2207	-0.0048
0.2227	-0.00494
0.2246	-0.00567
0.2266	-0.00576
0.2285	-0.00614
0.2305	-0.00548
0.2324	-0.00492
0.2344	-0.0041
0.2363	-0.00375
0.2383	-0.00358
0.2402	-0.00344
0.2422	-0.0032
0.2441	-0.00367
0.2461	-0.00301
0.248	-0.00163
0.25	-0.000376
0.252	-0.000367
0.2539	-0.0021
0.2559	-0.00444
0.2578	-0.00552
0.2598	-0.00497
0.2617	-0.00463
0.2637	-0.00471
0.2656	-0.00587
0.2676	-0.00778
0.2695	-0.0106
0.2715	-0.0136
0.2734	-0.0155
0.2754	-0.0175
0.2773	-0.0181
0.2793	-0.0193
0.2813	-0.0215
0.2832	-0.0253
0.2852	-0.0306
0.2871	-0.0343
0.2891	-0.0366
0.291	-0.0373
0.293	-0.0374
0.2949	-0.0373
0.2969	-0.0384
0.2988	-0.039
0.3008	-0.0387
0.3027	-0.038
0.3047	-0.0372
0.3066	-0.0343
0.3086	-0.0318
0.3105	-0.0296
0.3125	-0.0279
0.3145	-0.0266
0.3164	-0.0264
0.3184	-0.0255
0.3203	-0.0242
0.3223	-0.0211
0.3242	-0.017
0.3262	-0.0139
0.3281	-0.0131
0.3301	-0.0162
0.332	-0.0199
0.334	-0.0231
0.3359	-0.0234
0.3379	-0.0234
0.3398	-0.022
0.3418	-0.0205
0.3438	-0.0198
0.3457	-0.0201
0.3477	-0.0222
0.3496	-0.0231
0.3516	-0.0204
0.3535	-0.0151
0.3555	-0.00952
0.3574	-0.0062
0.3594	-0.00467
0.3613	-0.00329
0.3633	-0.00123
0.3652	0.00221
0.3672	0.00621
0.3691	0.0104
0.3711	0.0152
0.373	0.0171
0.375	0.0152
0.377	0.0103
0.3789	0.00474
0.3809	0.00121
0.3828	0.0007
0.3848	0.00169
0.3867	0.00369
0.3887	0.00431
0.3906	0.00377
0.3926	0.00152
0.3945	-0.00215
0.3965	-0.00374
0.3984	-0.00311
0.4004	2.76e-05
0.4023	0.00368
0.4043	0.0059
0.4063	0.00588
0.4082	0.00349
0.4102	-0.00107
0.4121	-0.0054
0.4141	-0.00866
0.416	-0.00948
0.418	-0.0101
0.4199	-0.0113
0.4219	-0.016
0.4238	-0.024
0.4258	-0.0314
0.4277	-0.0368
0.4297	-0.0364
0.4316	-0.0337
0.4336	-0.0301
0.4355	-0.0271
0.4375	-0.0274
0.4395	-0.0287
0.4414	-0.0287
0.4434	-0.0292
0.4453	-0.028
0.4473	-0.0237
0.4492	-0.0191
0.4512	-0.0152
0.4531	-0.0143
0.4551	-0.0166
0.457	-0.0191
0.459	-0.0194
0.4609	-0.0177
0.4629	-0.0148
0.4648	-0.0123
0.4668	-0.00845
0.4688	-0.00399
0.4707	0.000359
0.4727	0.00375
0.4746	0.0065
0.4766	0.00841
0.4785	0.0104
0.4805	0.012
0.4824	0.0123
0.4844	0.0122
0.4863	0.0114
0.4883	0.0072
0.4902	0.000889
0.4922	-0.00586
0.4941	-0.0101
0.4961	-0.00873
0.498	-0.00343
0.5	0.00166
0.502	0.00368
0.5039	0.00237
0.5059	-0.000335
0.5078	-0.00261
0.5098	-0.00435
0.5117	-0.00702
0.5137	-0.0112
0.5156	-0.0188
0.5176	-0.0303
0.5195	-0.0402
0.5215	-0.0458
0.5234	-0.043
0.5254	-0.0369
0.5273	-0.0287
0.5293	-0.0217
0.5313	-0.0176
0.5332	-0.0162
0.5352	-0.0173
0.5371	-0.02
0.5391	-0.024
0.541	-0.0245
0.543	-0.0216
0.5449	-0.0187
0.5469	-0.0173
0.5488	-0.015
0.5508	-0.0109
0.5527	-0.0044
0.5547	0.00319
0.5566	0.0102
0.5586	0.0148
0.5605	0.0179
0.5625	0.0169
0.5645	0.0135
0.5664	0.00608
0.5684	-0.000778
0.5703	-0.00284
0.5723	0.00113
0.5742	0.00758
0.5762	0.0098
0.5781	0.00704
0.5801	0.00181
0.582	-0.0036
0.584	-0.00709
0.5859	-0.00852
0.5879	-0.00775
0.5898	-0.00746
0.5918	-0.0104
0.5938	-0.0185
0.5957	-0.0298
0.5977	-0.0385
0.5996	-0.0429
0.6016	-0.0407
0.6035	-0.035
0.6055	-0.0253
0.6074	-0.0188
0.6094	-0.0145
0.6113	-0.014
0.6133	-0.017
0.6152	-0.0189
0.6172	-0.0199
0.6191	-0.0197
0.6211	-0.0167
0.623	-0.0112
0.625	-0.00512
0.627	0.00143
0.6289	0.00829
0.6309	0.0128
0.6328	0.0142
0.6348	0.0159
0.6367	0.0147
0.6387	0.0104
0.6406	0.00242
0.6426	-0.00413
0.6445	-0.00663
0.6465	-0.00445
0.6484	-0.00194
0.6504	0.00256
0.6523	0.00494
0.6543	0.00618
0.6563	0.00241
0.6582	-0.00539
0.6602	-0.0179
0.6621	-0.0321
0.6641	-0.0418
0.666	-0.0431
0.668	-0.0361
0.6699	-0.0287
0.6719	-0.0201
0.6738	-0.0135
0.6758	-0.0121
0.6777	-0.0173
0.6797	-0.0263
0.6816	-0.032
0.6836	-0.0289
0.6855	-0.0182
0.6875	-0.00562
0.6895	0.00323
0.6914	0.00528
0.6934	0.00608
0.6953	0.0081
0.6973	0.00962
0.6992	0.0107
0.7012	0.0117
0.7031	0.0122
0.7051	0.011
0.707	0.0101
0.709	0.00648
0.7109	0.00185
0.7129	-0.00511
0.7148	-0.00737
0.7168	-0.00506
0.7188	-0.00177
0.7207	-0.00284
0.7227	-0.00763
0.7246	-0.0138
0.7266	-0.0242
0.7285	-0.0357
0.7305	-0.044
0.7324	-0.0462
0.7344	-0.0393
0.7363	-0.0266
0.7383	-0.0147
0.7402	-0.00606
0.7422	-0.00486
0.7441	-0.0104
0.7461	-0.0218
0.748	-0.0325
0.75	-0.0296
0.752	-0.0151
0.7539	0.00466
0.7559	0.0219
0.7578	0.0278
0.7598	0.0238
0.7617	0.0153
0.7637	0.00765
0.7656	0.000454
0.7676	-0.00454
0.7695	-0.00374
0.7715	0.00109
0.7734	0.00773
0.7754	0.0129
0.7773	0.00993
0.7793	0.00161
0.7813	-0.00996
0.7832	-0.0199
0.7852	-0.0281
0.7871	-0.036
0.7891	-0.0379
0.791	-0.0323
0.793	-0.0233
0.7949	-0.0169
0.7969	-0.0171
0.7988	-0.0213
0.8008	-0.0268
0.8027	-0.0268
0.8047	-0.0219
0.8066	-0.0139
0.8086	-0.0037
0.8105	0.00447
0.8125	0.00647
0.8145	0.00653
0.8164	0.00752
0.8184	0.0096
0.8203	0.0129
0.8223	0.0147
0.8242	0.0129
0.8262	0.00909
0.8281	0.00581
0.8301	-0.00158
0.832	-0.00893
0.834	-0.0105
0.8359	-0.00535
0.8379	0.00228
0.8398	0.00399
0.8418	-0.00425
0.8438	-0.0233
0.8457	-0.043
0.8477	-0.0535
0.8496	-0.0518
0.8516	-0.0374
0.8535	-0.0165
0.8555	0.00192
0.8574	0.00706
0.8594	-0.00306
0.8613	-0.0242
0.8633	-0.0417
0.8652	-0.0401
0.8672	-0.0181
0.8691	0.0119
0.8711	0.0386
0.873	0.0461
0.875	0.0336
0.877	0.0118
0.8789	-0.00899
0.8809	-0.0189
0.8828	-0.0128
0.8848	0.00277
0.8867	0.019
0.8887	0.0275
0.8906	0.0182
0.8926	-0.00462
0.8945	-0.0301
0.8965	-0.0429
0.8984	-0.041
0.9004	-0.0275
0.9023	-0.0139
0.9043	-0.0128
0.9063	-0.02
0.9082	-0.0291
0.9102	-0.0318
0.9121	-0.029
0.9141	-0.0209
0.916	-0.00957
0.918	0.000485
0.9199	0.00652
0.9219	0.00222
0.9238	-0.00451
0.9258	-0.0042
0.9277	0.00364
0.9297	0.018
0.9316	0.0268
0.9336	0.0251
0.9355	0.0145
0.9375	0.000899
0.9395	-0.011
0.9414	-0.0173
0.9434	-0.0127
0.9453	6.41e-05
0.9473	0.0116
0.9492	0.012
0.9512	-0.00894
0.9531	-0.0402
0.9551	-0.0607
0.957	-0.0608
0.959	-0.0398
0.9609	-0.0128
0.9629	0.00748
0.9648	0.0103
0.9668	-0.00321
0.9688	-0.0239
0.9707	-0.0401
0.9727	-0.0363
0.9746	-0.0129
0.9766	0.022
0.9785	0.0488
0.9805	0.0491
0.9824	0.028
0.9844	-0.000455
0.9863	-0.0175
0.9883	-0.0168
0.9902	-0.00383
0.9922	0.00939
0.9941	0.0182
0.9961	0.0178
0.998	0.00191
1	-0.0214
1.002	-0.0403
1.0039	-0.0473
1.0059	-0.0357
1.0078	-0.0245
1.0098	-0.0206
1.0117	-0.0219
1.0137	-0.0213
1.0156	-0.0157
1.0176	-0.0126
1.0195	-0.0139
1.0215	-0.0163
1.0234	-0.0103
1.0254	0.000363
1.0273	0.0112
1.0293	0.017
1.0313	0.0187
1.0332	0.0218
1.0352	0.0208
1.0371	0.0128
1.0391	0.00181
1.041	-0.00829
1.043	-0.00816
1.0449	0.00118
1.0469	0.00802
1.0488	0.00547
1.0508	-0.00596
1.0527	-0.025
1.0547	-0.0423
1.0566	-0.0481
1.0586	-0.0413
1.0605	-0.0241
1.0625	-0.00853
1.0645	-0.000993
1.0664	-0.00687
1.0684	-0.0177
1.0703	-0.0249
1.0723	-0.0187
1.0742	-0.00405
1.0762	0.0145
1.0781	0.029
1.0801	0.0318
1.082	0.0252
1.084	0.0113
1.0859	-0.00091
1.0879	-0.0052
1.0898	-0.0013
1.0918	0.00275
1.0938	0.00495
1.0957	0.00267
1.0977	-0.00508
1.0996	-0.0139
1.1016	-0.0261
1.1035	-0.0363
1.1055	-0.0423
1.1074	-0.0421
1.1094	-0.0327
1.1113	-0.0171
1.1133	-0.00196
1.1152	0.00289
1.1172	-0.00667
1.1191	-0.0209
1.1211	-0.0257
1.123	-0.0158
1.125	0.00963
1.127	0.0332
1.1289	0.0446
1.1309	0.0373
1.1328	0.0168
1.1348	-0.00468
1.1367	-0.0163
1.1387	-0.0146
1.1406	-0.00233
1.1426	0.0115
1.1445	0.0139
1.1465	0.00152
1.1484	-0.0246
1.1504	-0.0487
1.1523	-0.0552
1.1543	-0.044
1.1563	-0.0224
1.1582	-0.0038
1.1602	0.00257
1.1621	-0.0025
1.1641	-0.0143
1.166	-0.0219
1.168	-0.0195
1.1699	-0.00606
1.1719	0.0157
1.1738	0.0315
1.1758	0.037
1.1777	0.0283
1.1797	0.0116
1.1816	-0.00273
1.1836	-0.0114
1.1855	-0.014
1.1875	-0.00784
1.1895	0.000669
1.1914	0.00689
1.1934	0.00238
1.1953	-0.0189
1.1973	-0.044
1.1992	-0.0595
1.2012	-0.0531
1.2031	-0.0271
1.2051	0.00137
1.207	0.0145
1.209	0.00602
1.2109	-0.0121
1.2129	-0.025
1.2148	-0.0235
1.2168	-0.00272
1.2188	0.026
1.2207	0.0464
1.2227	0.0452
1.2246	0.0241
1.2266	-3.37e-05
1.2285	-0.0143
1.2305	-0.0167
1.2324	-0.00964
1.2344	-0.00304
1.2363	-0.00039
1.2383	-0.00416
1.2402	-0.0168
1.2422	-0.0323
1.2441	-0.047
1.2461	-0.0502
1.248	-0.0368
1.25	-0.0134
1.252	0.00478
1.2539	0.0076
1.2559	0.00102
1.2578	-0.00813
1.2598	-0.0114
1.2617	-0.0038
1.2637	0.00912
1.2656	0.0267
1.2676	0.0371
1.2695	0.0334
1.2715	0.015
1.2734	-0.00922
1.2754	-0.0218
1.2773	-0.0193
1.2793	-0.00853
1.2813	-0.00143
1.2832	-0.00892
1.2852	-0.024
1.2871	-0.0379
1.2891	-0.0416
1.291	-0.033
1.293	-0.0182
1.2949	-0.00688
1.2969	-0.00367
1.2988	-0.00335
1.3008	-0.000301
1.3027	0.00472
1.3047	0.0121
1.3066	0.0181
1.3086	0.0223
1.3105	0.0214
1.3125	0.0159
1.3145	0.00882
1.3164	0.000493
1.3184	-0.00507
1.3203	-0.0115
1.3223	-0.0167
1.3242	-0.0193
1.3262	-0.0199
1.3281	-0.0219
1.3301	-0.0306
1.332	-0.0408
1.334	-0.0377
1.3359	-0.0198
1.3379	-0.0016
1.3398	0.00448
1.3418	0.00114
1.3438	-0.00373
1.3457	0.00175
1.3477	0.0131
1.3496	0.0246
1.3516	0.0276
1.3535	0.0214
1.3555	0.0129
1.3574	0.00305
1.3594	-0.00269
1.3613	-0.00704
1.3633	-0.0121
1.3652	-0.0169
1.3672	-0.0241
1.3691	-0.0288
1.3711	-0.0324
1.373	-0.0317
1.375	-0.0246
1.377	-0.0145
1.3789	-0.0095
1.3809	-0.00867
1.3828	-0.00344
1.3848	0.0064
1.3867	0.0179
1.3887	0.0206
1.3906	0.0179
1.3926	0.0156
1.3945	0.0138
1.3965	0.0125
1.3984	0.00463
1.4004	-0.00318
1.4023	-0.011
1.4043	-0.0161
1.4063	-0.0197
1.4082	-0.0241
1.4102	-0.029
1.4121	-0.0361
1.4141	-0.0364
1.416	-0.0239
1.418	-0.00572
1.4199	0.00209
1.4219	-0.000286
1.4238	-0.00468
1.4258	0.00156
1.4277	0.0175
1.4297	0.0292
1.4316	0.0294
1.4336	0.0194
1.4355	0.011
1.4375	0.00399
1.4395	-8.13e-05
1.4414	-0.00718
1.4434	-0.0177
1.4453	-0.0259
1.4473	-0.0293
1.4492	-0.0255
1.4512	-0.0266
1.4531	-0.0301
1.4551	-0.0274
1.457	-0.0175
1.459	-0.00743
1.4609	0.00214
1.4629	0.00806
1.4648	0.0142
1.4668	0.0183
1.4688	0.0198
1.4707	0.0196
1.4727	0.017
1.4746	0.0131
1.4766	0.00375
1.4785	-0.00367
1.4805	-0.0106
1.4824	-0.0144
1.4844	-0.0216
1.4863	-0.0295
1.4883	-0.036
1.4902	-0.0365
1.4922	-0.0262
1.4941	-0.0111
1.4961	-0.00355
1.498	-0.00388
1.5	-0.00373
1.502	0.00494
1.5039	0.021
1.5059	0.0303
1.5078	0.0285
1.5098	0.0168
1.5117	0.00827
1.5137	0.00287
1.5156	0.00102
1.5176	-0.0089
1.5195	-0.0219
1.5215	-0.0315
1.5234	-0.0281
1.5254	-0.0219
1.5273	-0.0265
1.5293	-0.0339
1.5313	-0.0296
1.5332	-0.0122
1.5352	0.0038
1.5371	0.00958
1.5391	0.0089
1.541	0.0134
1.543	0.023
1.5449	0.0303
1.5469	0.024
1.5488	0.0101
1.5508	-0.00289
1.5527	-0.00566
1.5547	-0.00704
1.5566	-0.0153
1.5586	-0.0299
1.5605	-0.036
1.5625	-0.0326
1.5645	-0.0243
1.5664	-0.0165
1.5684	-0.0131
1.5703	-0.0106
1.5723	-0.00289
1.5742	0.00852
1.5762	0.02
1.5781	0.0237
1.5801	0.0229
1.582	0.0191
1.584	0.0151
1.5859	0.00691
1.5879	-0.0026
1.5898	-0.0118
1.5918	-0.0204
1.5938	-0.0267
1.5957	-0.0274
1.5977	-0.0263
1.5996	-0.0298
1.6016	-0.0304
1.6035	-0.0212
1.6055	-0.00671
1.6074	0.00499
1.6094	0.00939
1.6113	0.013
1.6133	0.0214
1.6152	0.0303
1.6172	0.0288
1.6191	0.0167
1.6211	0.00175
1.623	-0.00537
1.625	-0.00756
1.627	-0.0155
1.6289	-0.0289
1.6309	-0.0371
1.6328	-0.0324
1.6348	-0.0247
1.6367	-0.019
1.6387	-0.0162
1.6406	-0.0131
1.6426	-0.00193
1.6445	0.0124
1.6465	0.0228
1.6484	0.0225
1.6504	0.0202
1.6523	0.0217
1.6543	0.0211
1.6563	0.00999
1.6582	-0.00768
1.6602	-0.0219
1.6621	-0.0261
1.6641	-0.0265
1.666	-0.027
1.668	-0.0327
1.6699	-0.0333
1.6719	-0.0186
1.6738	-0.00331
1.6758	0.00377
1.6777	0.00339
1.6797	0.0081
1.6816	0.0232
1.6836	0.0358
1.6855	0.0318
1.6875	0.0131
1.6895	-0.00224
1.6914	-0.00388
1.6934	-0.0062
1.6953	-0.0208
1.6973	-0.0388
1.6992	-0.0379
1.7012	-0.0255
1.7031	-0.0202
1.7051	-0.0222
1.707	-0.0211
1.709	-0.00653
1.7109	0.0117
1.7129	0.0209
1.7148	0.0185
1.7168	0.0183
1.7188	0.0268
1.7207	0.0313
1.7227	0.0172
1.7246	-0.0073
1.7266	-0.0243
1.7285	-0.0293
1.7305	-0.0287
1.7324	-0.0285
1.7344	-0.0315
1.7363	-0.0287
1.7383	-0.0161
1.7402	-0.00312
1.7422	0.00292
1.7441	0.00696
1.7461	0.0143
1.748	0.0262
1.75	0.0337
1.752	0.0269
1.7539	0.00991
1.7559	-0.00399
1.7578	-0.00861
1.7598	-0.0148
1.7617	-0.0285
1.7637	-0.0376
1.7656	-0.0313
1.7676	-0.024
1.7695	-0.0212
1.7715	-0.0199
1.7734	-0.0102
1.7754	0.0079
1.7773	0.0213
1.7793	0.0241
1.7813	0.025
1.7832	0.0281
1.7852	0.0286
1.7871	0.0136
1.7891	-0.00786
1.791	-0.0249
1.793	-0.0331
1.7949	-0.0333
1.7969	-0.0298
1.7988	-0.0283
1.8008	-0.0242
1.8027	-0.0151
1.8047	-0.0062
1.8066	0.00481
1.8086	0.0149
1.8105	0.0227
1.8125	0.0273
1.8145	0.0297
1.8164	0.0248
1.8184	0.0113
1.8203	-0.00622
1.8223	-0.0223
1.8242	-0.032
1.8262	-0.0347
1.8281	-0.0293
1.8301	-0.0271
1.832	-0.0244
1.834	-0.0157
1.8359	-0.00293
1.8379	0.00963
1.8398	0.0159
1.8418	0.0211
1.8438	0.0289
1.8457	0.0359
1.8477	0.028
1.8496	0.00683
1.8516	-0.0144
1.8535	-0.0289
1.8555	-0.0387
1.8574	-0.0391
1.8594	-0.0308
1.8613	-0.0237
1.8633	-0.0171
1.8652	-0.0122
1.8672	-0.000141
1.8691	0.0142
1.8711	0.0224
1.873	0.0221
1.875	0.0235
1.877	0.0292
1.8789	0.026
1.8809	0.00571
1.8828	-0.0197
1.8848	-0.0367
1.8867	-0.0402
1.8887	-0.0333
1.8906	-0.0292
1.8926	-0.0232
1.8945	-0.0125
1.8965	0.00108
1.8984	0.0119
1.9004	0.0179
1.9023	0.0204
1.9043	0.0263
1.9063	0.0298
1.9082	0.0235
1.9102	0.00606
1.9121	-0.014
1.9141	-0.0329
1.916	-0.0444
1.918	-0.0385
1.9199	-0.0277
1.9219	-0.0229
1.9238	-0.0181
1.9258	-0.00476
1.9277	0.0151
1.9297	0.0258
1.9316	0.0209
1.9336	0.0172
1.9355	0.0256
1.9375	0.0331
1.9395	0.0183
1.9414	-0.0116
1.9434	-0.0388
1.9453	-0.0474
1.9473	-0.0391
1.9492	-0.0303
1.9512	-0.0261
1.9531	-0.0154
1.9551	0.00129
1.957	0.0208
1.959	0.0285
1.9609	0.0234
1.9629	0.0166
1.9648	0.0199
1.9668	0.0227
1.9688	0.0131
1.9707	-0.0107
1.9727	-0.0365
1.9746	-0.0471
1.9766	-0.0366
1.9785	-0.0285
1.9805	-0.0252
1.9824	-0.0167
1.9844	0.00491
1.9863	0.0272
1.9883	0.0325
1.9902	0.0229
1.9922	0.0193
1.9941	0.0252
1.9961	0.0218
1.998	0.00142
2	-0.0271
2.002	-0.0493
2.0039	-0.0478
2.0059	-0.0328
2.0078	-0.0237
2.0098	-0.0186
2.0117	-0.00839
2.0137	0.0162
2.0156	0.0357
2.0176	0.0326
2.0195	0.016
2.0215	0.0134
2.0234	0.0216
2.0254	0.0175
2.0273	-0.00837
2.0293	-0.0414
2.0313	-0.0514
2.0332	-0.0373
2.0352	-0.0251
2.0371	-0.0213
2.0391	-0.0136
2.041	0.00939
2.043	0.0329
2.0449	0.0366
2.0469	0.0252
2.0488	0.0182
2.0508	0.0176
2.0527	0.0108
2.0547	-0.00934
2.0566	-0.0377
2.0586	-0.0521
2.0605	-0.0395
2.0625	-0.0248
2.0645	-0.0203
2.0664	-0.0167
2.0684	0.00357
2.0703	0.0317
2.0723	0.0418
2.0742	0.0292
2.0762	0.0171
2.0781	0.0172
2.0801	0.0137
2.082	-0.00598
2.084	-0.038
2.0859	-0.0545
2.0879	-0.0432
2.0898	-0.0251
2.0918	-0.0147
2.0938	-0.00975
2.0957	0.00461
2.0977	0.0276
2.0996	0.0386
2.1016	0.032
2.1035	0.0201
2.1055	0.0132
2.1074	0.00514
2.1094	-0.0128
2.1113	-0.0397
2.1133	-0.0525
2.1152	-0.0401
2.1172	-0.0246
2.1191	-0.014
2.1211	-0.0046
2.123	0.0148
2.125	0.0326
2.127	0.0363
2.1289	0.029
2.1309	0.0231
2.1328	0.0147
2.1348	-0.0012
2.1367	-0.0268
2.1387	-0.0506
2.1406	-0.0508
2.1426	-0.0351
2.1445	-0.0198
2.1465	-0.00971
2.1484	0.00318
2.1504	0.0249
2.1523	0.0386
2.1543	0.0334
2.1563	0.0217
2.1582	0.0162
2.1602	0.00747
2.1621	-0.011
2.1641	-0.0386
2.166	-0.0525
2.168	-0.0418
2.1699	-0.0261
2.1719	-0.0139
2.1738	-0.0017
2.1758	0.0191
2.1777	0.0355
2.1797	0.037
2.1816	0.0284
2.1836	0.0215
2.1855	0.0106
2.1875	-0.00939
2.1895	-0.0367
2.1914	-0.0548
2.1934	-0.0464
2.1953	-0.0295
2.1973	-0.018
2.1992	-0.00813
2.2012	0.0133
2.2031	0.0363
2.2051	0.0406
2.207	0.0285
2.209	0.0209
2.2109	0.0159
2.2129	0.00119
2.2148	-0.0286
2.2168	-0.0541
2.2188	-0.052
2.2207	-0.0345
2.2227	-0.0195
2.2246	-0.00788
2.2266	0.0125
2.2285	0.0351
2.2305	0.0412
2.2324	0.032
2.2344	0.0223
2.2363	0.0137
2.2383	-0.00467
2.2402	-0.0321
2.2422	-0.0538
2.2441	-0.0486
2.2461	-0.0325
2.248	-0.0219
2.25	-0.0107
2.252	0.0155
2.2539	0.0408
2.2559	0.0425
2.2578	0.0287
2.2598	0.0207
2.2617	0.0161
2.2637	-0.00233
2.2656	-0.0372
2.2676	-0.0611
2.2695	-0.0516
2.2715	-0.0302
2.2734	-0.0172
2.2754	-0.0068
2.2773	0.0187
2.2793	0.0447
2.2813	0.0456
2.2832	0.0283
2.2852	0.0151
2.2871	0.00714
2.2891	-0.0113
2.291	-0.0422
2.293	-0.0576
2.2949	-0.0437
2.2969	-0.024
2.2988	-0.0117
2.3008	0.00328
2.3027	0.03
2.3047	0.045
2.3066	0.0387
2.3086	0.0258
2.3105	0.0156
2.3125	0.00161
2.3145	-0.0263
2.3164	-0.0569
2.3184	-0.0577
2.3203	-0.0369
2.3223	-0.0185
2.3242	-0.00741
2.3262	0.0136
2.3281	0.0413
2.3301	0.0487
2.332	0.0344
2.334	0.0191
2.3359	0.00827
2.3379	-0.00928
2.3398	-0.0406
2.3418	-0.0602
2.3438	-0.0508
2.3457	-0.0284
2.3477	-0.00986
2.3496	0.00891
2.3516	0.0342
2.3535	0.0467
2.3555	0.0399
2.3574	0.0275
2.3594	0.0128
2.3613	-0.00705
2.3633	-0.0353
2.3652	-0.0581
2.3672	-0.0518
2.3691	-0.0337
2.3711	-0.0188
2.373	-0.00216
2.375	0.0268
2.377	0.0513
2.3789	0.0476
2.3809	0.0313
2.3828	0.0169
2.3848	0.00152
2.3867	-0.027
2.3887	-0.0587
2.3906	-0.0613
2.3926	-0.04
2.3945	-0.0176
2.3965	-0.00164
2.3984	0.0218
2.4004	0.0462
2.4023	0.0483
2.4043	0.0333
2.4063	0.0183
2.4082	0.00192
2.4102	-0.023
2.4121	-0.0537
2.4141	-0.0597
2.416	-0.0416
2.418	-0.0219
2.4199	-0.00472
2.4219	0.0222
2.4238	0.0484
2.4258	0.0512
2.4277	0.0361
2.4297	0.0191
2.4316	0.0018
2.4336	-0.0245
2.4355	-0.0567
2.4375	-0.064
2.4395	-0.0447
2.4414	-0.0214
2.4434	-0.00295
2.4453	0.0223
2.4473	0.0479
2.4492	0.0505
2.4512	0.0358
2.4531	0.0207
2.4551	0.00281
2.457	-0.0259
2.459	-0.0571
2.4609	-0.062
2.4629	-0.043
2.4648	-0.0218
2.4668	-0.00194
2.4688	0.028
2.4707	0.0537
2.4727	0.0518
2.4746	0.0343
2.4766	0.0158
2.4785	-0.00375
2.4805	-0.0334
2.4824	-0.0618
2.4844	-0.0599
2.4863	-0.0377
2.4883	-0.0181
2.4902	0.00171
2.4922	0.031
2.4941	0.0551
2.4961	0.052
2.498	0.0354
2.5	0.0159
2.502	-0.00723
2.5039	-0.0416
2.5059	-0.0671
2.5078	-0.0611
2.5098	-0.0369
2.5117	-0.0132
2.5137	0.0125
2.5156	0.0449
2.5176	0.0591
2.5195	0.0468
2.5215	0.0267
2.5234	0.00467
2.5254	-0.0227
2.5273	-0.054
2.5293	-0.0644
2.5313	-0.0467
2.5332	-0.0238
2.5352	-0.00432
2.5371	0.0221
2.5391	0.0497
2.541	0.0536
2.543	0.0399
2.5449	0.0218
2.5469	0.00145
2.5488	-0.0317
2.5508	-0.0646
2.5527	-0.0661
2.5547	-0.0438
2.5566	-0.0201
2.5586	0.00382
2.5605	0.037
2.5625	0.0607
2.5645	0.054
2.5664	0.0339
2.5684	0.0118
2.5703	-0.0149
2.5723	-0.0507
2.5742	-0.0696
2.5762	-0.0553
2.5781	-0.0293
2.5801	-0.00658
2.582	0.0222
2.584	0.053
2.5859	0.0584
2.5879	0.042
2.5898	0.0206
2.5918	-0.00245
2.5938	-0.0346
2.5957	-0.0646
2.5977	-0.0638
2.5996	-0.0418
2.6016	-0.0197
2.6035	0.0046
2.6055	0.0389
2.6074	0.0625
2.6094	0.0551
2.6113	0.0347
2.6133	0.0106
2.6152	-0.0193
2.6172	-0.0572
2.6191	-0.0732
2.6211	-0.0555
2.623	-0.0284
2.625	-0.00248
2.627	0.0311
2.6289	0.06
2.6309	0.0599
2.6328	0.0411
2.6348	0.016
2.6367	-0.0129
2.6387	-0.049
2.6406	-0.0709
2.6426	-0.0584
2.6445	-0.0332
2.6465	-0.00937
2.6484	0.0195
2.6504	0.0531
2.6523	0.0613
2.6543	0.0462
2.6563	0.0243
2.6582	0.000379
2.6602	-0.0363
2.6621	-0.0706
2.6641	-0.0694
2.666	-0.0436
2.668	-0.0175
2.6699	0.0108
2.6719	0.0472
2.6738	0.0655
2.6758	0.0538
2.6777	0.0309
2.6797	0.00416
2.6816	-0.0298
2.6836	-0.0652
2.6855	-0.0709
2.6875	-0.049
2.6895	-0.022
2.6914	0.00726
2.6934	0.0448
2.6953	0.0656
2.6973	0.0554
2.6992	0.0337
2.7012	0.00874
2.7031	-0.0257
2.7051	-0.0654
2.707	-0.0756
2.709	-0.0529
2.7109	-0.0254
2.7129	0.00358
2.7148	0.041
2.7168	0.0679
2.7188	0.0616
2.7207	0.0391
2.7227	0.0103
2.7246	-0.025
2.7266	-0.065
2.7285	-0.0776
2.7305	-0.0559
2.7324	-0.0264
2.7344	0.00444
2.7363	0.0438
2.7383	0.0686
2.7402	0.0602
2.7422	0.0377
2.7441	0.00835
2.7461	-0.0279
2.748	-0.0679
2.75	-0.0761
2.752	-0.0521
2.7539	-0.023
2.7559	0.00665
2.7578	0.0458
2.7598	0.0706
2.7617	0.0616
2.7637	0.0356
2.7656	0.00565
2.7676	-0.031
2.7695	-0.0704
2.7715	-0.0774
2.7734	-0.0535
2.7754	-0.0232
2.7773	0.00868
2.7793	0.0499
2.7813	0.0719
2.7832	0.0617
2.7852	0.035
2.7871	0.00211
2.7891	-0.0385
2.791	-0.0748
2.793	-0.0744
2.7949	-0.0479
2.7969	-0.0175
2.7988	0.0174
2.8008	0.0592
2.8027	0.0737
2.8047	0.0564
2.8066	0.0273
2.8086	-0.00618
2.8105	-0.0479
2.8125	-0.0795
2.8145	-0.0718
2.8164	-0.0428
2.8184	-0.0118
2.8203	0.0251
2.8223	0.0655
2.8242	0.0733
2.8262	0.0526
2.8281	0.022
2.8301	-0.0146
2.832	-0.0578
2.834	-0.0816
2.8359	-0.0674
2.8379	-0.037
2.8398	-0.00356
2.8418	0.0407
2.8438	0.0755
2.8457	0.0701
2.8477	0.0443
2.8496	0.0097
2.8516	-0.0309
2.8535	-0.074
2.8555	-0.0824
2.8574	-0.0567
2.8594	-0.0238
2.8613	0.0131
2.8633	0.0575
2.8652	0.0803
2.8672	0.065
2.8691	0.0322
2.8711	-0.00541
2.873	-0.0497
2.875	-0.0835
2.877	-0.0766
2.8789	-0.0464
2.8809	-0.0122
2.8828	0.0313
2.8848	0.0729
2.8867	0.0774
2.8887	0.0539
2.8906	0.0187
2.8926	-0.0237
2.8945	-0.0707
2.8965	-0.087
2.8984	-0.0642
2.9004	-0.0303
2.9023	0.00872
2.9043	0.0575
2.9063	0.084
2.9082	0.0694
2.9102	0.0363
2.9121	-0.00455
2.9141	-0.052
2.916	-0.0875
2.918	-0.0786
2.9199	-0.0466
2.9219	-0.0104
2.9238	0.0335
2.9258	0.0764
2.9277	0.0813
2.9297	0.0551
2.9316	0.0163
2.9336	-0.0301
2.9355	-0.0763
2.9375	-0.0885
2.9395	-0.0629
2.9414	-0.0286
2.9434	0.0135
2.9453	0.0654
2.9473	0.0868
2.9492	0.0687
2.9512	0.0322
2.9531	-0.0133
2.9551	-0.0655
2.957	-0.0936
2.959	-0.0752
2.9609	-0.0396
2.9629	0.000773
2.9648	0.0518
2.9668	0.0886
2.9688	0.0814
2.9707	0.0463
2.9727	-0.00072
2.9746	-0.0525
2.9766	-0.0923
2.9785	-0.085
2.9805	-0.052
2.9824	-0.0131
2.9844	0.0374
2.9863	0.0833
2.9883	0.0864
2.9902	0.0569
2.9922	0.0127
2.9941	-0.0404
2.9961	-0.0866
2.998	-0.0905
3	-0.0589
3.002	-0.0211
3.0039	0.0262
3.0059	0.0783
3.0078	0.093
3.0098	0.0664
3.0117	0.0209
3.0137	-0.0321
3.0156	-0.0844
3.0176	-0.0959
3.0195	-0.0671
3.0215	-0.0295
3.0234	0.0175
3.0254	0.0723
3.0273	0.0963
3.0293	0.0757
3.0313	0.0316
3.0332	-0.025
3.0352	-0.0813
3.0371	-0.1
3.0391	-0.0731
3.041	-0.0338
3.043	0.0128
3.0449	0.0717
3.0469	0.0992
3.0488	0.0797
3.0508	0.0342
3.0527	-0.0245
3.0547	-0.0838
3.0566	-0.105
3.0586	-0.0761
3.0605	-0.0345
3.0625	0.0143
3.0645	0.0727
3.0664	0.103
3.0684	0.0848
3.0703	0.0373
3.0723	-0.0252
3.0742	-0.0882
3.0762	-0.109
3.0781	-0.0777
3.0801	-0.0359
3.082	0.0152
3.084	0.0769
3.0859	0.105
3.0879	0.0842
3.0898	0.0341
3.0918	-0.0316
3.0938	-0.0944
3.0957	-0.109
3.0977	-0.074
3.0996	-0.0291
3.1016	0.0244
3.1035	0.0849
3.1055	0.108
3.1074	0.0824
3.1094	0.0265
3.1113	-0.0441
3.1133	-0.106
3.1152	-0.11
3.1172	-0.0697
3.1191	-0.0233
3.1211	0.0345
3.123	0.0928
3.125	0.109
3.127	0.0794
3.1289	0.0187
3.1309	-0.0594
3.1328	-0.116
3.1348	-0.108
3.1367	-0.0597
3.1387	-0.0111
3.1406	0.0518
3.1426	0.106
3.1445	0.109
3.1465	0.0678
3.1484	-0.00299
3.1504	-0.085
3.1523	-0.127
3.1543	-0.0991
3.1563	-0.0452
3.1582	0.00947
3.1602	0.0729
3.1621	0.114
3.1641	0.105
3.166	0.0538
3.168	-0.0288
3.1699	-0.111
3.1719	-0.132
3.1738	-0.0847
3.1758	-0.0271
3.1777	0.0347
3.1797	0.0961
3.1816	0.116
3.1836	0.0903
3.1855	0.0258
3.1875	-0.0633
3.1895	-0.131
3.1914	-0.122
3.1934	-0.0628
3.1953	-0.00076
3.1973	0.0657
3.1992	0.115
3.2012	0.114
3.2031	0.0704
3.2051	-0.00914
3.207	-0.104
3.209	-0.144
3.2109	-0.104
3.2129	-0.0376
3.2148	0.0315
3.2168	0.0971
3.2188	0.122
3.2207	0.1
3.2227	0.0394
3.2246	-0.0554
3.2266	-0.136
3.2285	-0.137
3.2305	-0.0738
3.2324	-0.00273
3.2344	0.0727
3.2363	0.121
3.2383	0.117
3.2402	0.0728
3.2422	-0.00903
3.2441	-0.108
3.2461	-0.153
3.248	-0.113
3.25	-0.0379
3.252	0.0434
3.2539	0.113
3.2559	0.132
3.2578	0.101
3.2598	0.0312
3.2617	-0.0715
3.2637	-0.152
3.2656	-0.143
3.2676	-0.0727
3.2695	0.0112
3.2715	0.0968
3.2734	0.137
3.2754	0.119
3.2773	0.0596
3.2793	-0.0374
3.2813	-0.136
3.2832	-0.161
3.2852	-0.102
3.2871	-0.0164
3.2891	0.0772
3.291	0.139
3.293	0.137
3.2949	0.0851
3.2969	-0.00489
3.2988	-0.116
3.3008	-0.171
3.3027	-0.13
3.3047	-0.0461
3.3066	0.0545
3.3086	0.135
3.3105	0.148
3.3125	0.104
3.3145	0.0206
3.3164	-0.0914
3.3184	-0.168
3.3203	-0.15
3.3223	-0.0707
3.3242	0.031
3.3262	0.128
3.3281	0.158
3.3301	0.12
3.332	0.0396
3.334	-0.0749
3.3359	-0.165
3.3379	-0.163
3.3398	-0.0918
3.3418	0.0108
3.3438	0.118
3.3457	0.166
3.3477	0.138
3.3496	0.0578
3.3516	-0.0593
3.3535	-0.164
3.3555	-0.175
3.3574	-0.107
3.3594	-0.00637
3.3613	0.108
3.3633	0.168
3.3652	0.15
3.3672	0.0732
3.3691	-0.0484
3.3711	-0.162
3.373	-0.185
3.375	-0.119
3.377	-0.0137
3.3789	0.105
3.3809	0.175
3.3828	0.161
3.3848	0.0837
3.3867	-0.0425
3.3887	-0.167
3.3906	-0.195
3.3926	-0.129
3.3945	-0.0198
3.3965	0.106
3.3984	0.18
3.4004	0.168
3.4023	0.0894
3.4043	-0.0431
3.4063	-0.171
3.4082	-0.201
3.4102	-0.133
3.4121	-0.0179
3.4141	0.115
3.416	0.188
3.418	0.172
3.4199	0.0869
3.4219	-0.0539
3.4238	-0.183
3.4258	-0.206
3.4277	-0.133
3.4297	-0.00911
3.4316	0.128
3.4336	0.2
3.4355	0.176
3.4375	0.0787
3.4395	-0.0715
3.4414	-0.198
3.4434	-0.209
3.4453	-0.126
3.4473	0.00574
3.4492	0.146
3.4512	0.207
3.4531	0.173
3.4551	0.0626
3.457	-0.0982
3.459	-0.215
3.4609	-0.208
3.4629	-0.112
3.4648	0.0336
3.4668	0.171
3.4688	0.218
3.4707	0.164
3.4727	0.0364
3.4746	-0.133
3.4766	-0.232
3.4785	-0.201
3.4805	-0.09
3.4824	0.0664
3.4844	0.194
3.4863	0.22
3.4883	0.15
3.4902	-0.00042
3.4922	-0.172
3.4941	-0.243
3.4961	-0.186
3.498	-0.0545
3.5	0.112
3.502	0.22
3.5039	0.217
3.5059	0.121
3.5078	-0.0533
3.5098	-0.215
3.5117	-0.248
3.5137	-0.162
3.5156	-0.00502
3.5176	0.163
3.5195	0.243
3.5215	0.207
3.5234	0.0736
3.5254	-0.118
3.5273	-0.251
3.5293	-0.238
3.5313	-0.122
3.5332	0.0569
3.5352	0.212
3.5371	0.253
3.5391	0.178
3.541	0.00514
3.543	-0.191
3.5449	-0.274
3.5469	-0.211
3.5488	-0.0565
3.5508	0.135
3.5527	0.256
3.5547	0.247
3.5566	0.123
3.5586	-0.0838
3.5605	-0.255
3.5625	-0.273
3.5645	-0.165
3.5664	0.0258
3.5684	0.208
3.5703	0.279
3.5723	0.218
3.5742	0.0403
3.5762	-0.181
3.5781	-0.295
3.5801	-0.246
3.582	-0.0867
3.584	0.127
3.5859	0.272
3.5879	0.278
3.5898	0.152
3.5918	-0.0764
3.5938	-0.272
3.5957	-0.304
3.5977	-0.188
3.5996	0.0232
3.6016	0.228
3.6035	0.308
3.6055	0.241
3.6074	0.042
3.6094	-0.202
3.6113	-0.322
3.6133	-0.269
3.6152	-0.0901
3.6172	0.148
3.6191	0.3
3.6211	0.303
3.623	0.152
3.625	-0.104
3.627	-0.304
3.6289	-0.323
3.6309	-0.186
3.6328	0.0521
3.6348	0.264
3.6367	0.335
3.6387	0.244
3.6406	0.00693
3.6426	-0.25
3.6445	-0.35
3.6465	-0.27
3.6484	-0.0519
3.6504	0.201
3.6523	0.341
3.6543	0.314
3.6563	0.114
3.6582	-0.172
3.6602	-0.35
3.6621	-0.33
3.6641	-0.147
3.666	0.123
3.668	0.322
3.6699	0.358
3.6719	0.211
3.6738	-0.0801
3.6758	-0.326
3.6777	-0.376
3.6797	-0.234
3.6816	0.0393
3.6836	0.289
3.6855	0.383
3.6875	0.288
3.6895	0.0146
3.6914	-0.28
3.6934	-0.397
3.6953	-0.308
3.6973	-0.05
3.6992	0.239
3.7012	0.393
3.7031	0.355
3.7051	0.108
3.707	-0.223
3.709	-0.41
3.7109	-0.369
3.7129	-0.13
3.7148	0.186
3.7168	0.394
3.7188	0.406
3.7207	0.196
3.7227	-0.158
3.7246	-0.409
3.7266	-0.429
3.7285	-0.212
3.7305	0.131
3.7324	0.389
3.7344	0.447
3.7363	0.268
3.7383	-0.0904
3.7402	-0.394
3.7422	-0.468
3.7441	-0.288
3.7461	0.0664
3.748	0.376
3.75	0.486
3.752	0.34
3.7539	-0.0271
3.7559	-0.38
3.7578	-0.507
3.7598	-0.355
3.7617	0.0112
3.7637	0.362
3.7656	0.516
3.7676	0.402
3.7695	0.0369
3.7715	-0.36
3.7734	-0.539
3.7754	-0.425
3.7773	-0.0487
3.7793	0.347
3.7813	0.548
3.7832	0.459
3.7852	0.0899
3.7871	-0.341
3.7891	-0.563
3.791	-0.477
3.793	-0.105
3.7949	0.325
3.7969	0.573
3.7988	0.519
3.8008	0.147
3.8027	-0.324
3.8047	-0.593
3.8066	-0.532
3.8086	-0.15
3.8105	0.312
3.8125	0.594
3.8145	0.562
3.8164	0.193
3.8184	-0.303
3.8203	-0.612
3.8223	-0.581
3.8242	-0.201
3.8262	0.295
3.8281	0.62
3.8301	0.612
3.832	0.232
3.834	-0.296
3.8359	-0.638
3.8379	-0.618
3.8398	-0.228
3.8418	0.288
3.8438	0.636
3.8457	0.647
3.8477	0.266
3.8496	-0.289
3.8516	-0.67
3.8535	-0.667
3.8555	-0.256
3.8574	0.298
3.8594	0.673
3.8613	0.683
3.8633	0.282
3.8652	-0.297
3.8672	-0.698
3.8691	-0.7
3.8711	-0.275
3.873	0.309
3.875	0.712
3.877	0.722
3.8789	0.291
3.8809	-0.325
3.8828	-0.745
3.8848	-0.729
3.8867	-0.265
3.8887	0.344
3.8906	0.75
3.8926	0.741
3.8945	0.281
3.8965	-0.357
3.8984	-0.788
3.9004	-0.755
3.9023	-0.253
[truncated: 2,098 more rows]
