# Supplementary material for: Effect of the Supports’ Positions on the Vibration Characteristics of a Flexible Rotor Shafting
Source: Hindawi journal article supplement (doi:10.1155/2020/1592794), 2020-02-12
Supplement: f1 [file 1592794.f1.zip › 1592794.f1/test_data/Table11_8.xlsx]

## Sheet: Sheet1
Time t/s	vibration deformation amount u/mm
0	0.000943
0.002	0.00127
0.0039	0.00104
0.0059	0.000847
0.0078	0.00118
0.0098	0.00125
0.0117	0.00173
0.0137	0.00168
0.0156	0.00222
0.0176	0.00197
0.0195	0.00248
0.0215	0.00253
0.0234	0.00269
0.0254	0.00269
0.0273	0.00284
0.0293	0.00278
0.0313	0.00312
0.0332	0.00354
0.0352	0.00411
0.0371	0.00506
0.0391	0.00612
0.041	0.00652
0.043	0.00692
0.0449	0.00662
0.0469	0.00662
0.0488	0.00695
0.0508	0.00791
0.0527	0.00876
0.0547	0.0096
0.0566	0.0105
0.0586	0.0107
0.0605	0.0107
0.0625	0.011
0.0645	0.0114
0.0664	0.0122
0.0684	0.0134
0.0703	0.0144
0.0723	0.0151
0.0742	0.0154
0.0762	0.0155
0.0781	0.0156
0.0801	0.016
0.082	0.017
0.084	0.0183
0.0859	0.0197
0.0879	0.0209
0.0898	0.0215
0.0918	0.021
0.0938	0.0199
0.0957	0.0193
0.0977	0.0195
0.0996	0.0208
0.1016	0.0223
0.1035	0.0235
0.1055	0.0245
0.1074	0.0249
0.1094	0.026
0.1113	0.0275
0.1133	0.0287
0.1152	0.0275
0.1172	0.0238
0.1191	0.02
0.1211	0.0192
0.123	0.022
0.125	0.0255
0.127	0.0258
0.1289	0.0246
0.1309	0.0228
0.1328	0.0208
0.1348	0.0187
0.1367	0.0174
0.1387	0.0172
0.1406	0.0195
0.1426	0.0229
0.1445	0.0234
0.1465	0.0218
0.1484	0.019
0.1504	0.0165
0.1523	0.0143
0.1543	0.0141
0.1563	0.0176
0.1582	0.0251
0.1602	0.0325
0.1621	0.0355
0.1641	0.0319
0.166	0.0262
0.168	0.0231
0.1699	0.0246
0.1719	0.0287
0.1738	0.0342
0.1758	0.04
0.1777	0.0453
0.1797	0.0478
0.1816	0.0456
0.1836	0.0391
0.1855	0.0346
0.1875	0.0356
0.1895	0.0434
0.1914	0.0528
0.1934	0.0585
0.1953	0.0587
0.1973	0.0557
0.1992	0.0523
0.2012	0.0505
0.2031	0.051
0.2051	0.0551
0.207	0.0605
0.209	0.0657
0.2109	0.0668
0.2129	0.0618
0.2148	0.052
0.2168	0.0407
0.2188	0.0322
0.2207	0.0297
0.2227	0.0342
0.2246	0.0413
0.2266	0.0457
0.2285	0.0422
0.2305	0.0325
0.2324	0.0206
0.2344	0.0124
0.2363	0.0111
0.2383	0.0148
0.2402	0.0205
0.2422	0.0256
0.2441	0.0278
0.2461	0.0237
0.248	0.0164
0.25	0.00866
0.252	0.00612
0.2539	0.00912
0.2559	0.0175
0.2578	0.0262
0.2598	0.0323
0.2617	0.0316
0.2637	0.023
0.2656	0.0107
0.2676	0.000246
0.2695	-0.00255
0.2715	0.00166
0.2734	0.00927
0.2754	0.014
0.2773	0.0143
0.2793	0.00852
0.2813	-9.84e-05
0.2832	-0.00644
0.2852	-0.00916
0.2871	-0.00721
0.2891	-0.00518
0.291	-0.00272
0.293	-0.000958
0.2949	-0.000527
0.2969	-0.00155
0.2988	-0.00239
0.3008	0.000203
0.3027	0.00563
0.3047	0.0111
0.3066	0.0129
0.3086	0.0113
0.3105	0.00765
0.3125	0.00542
0.3145	0.00494
0.3164	0.00797
0.3184	0.0131
0.3203	0.0208
0.3223	0.0257
0.3242	0.0257
0.3262	0.0237
0.3281	0.0216
0.3301	0.0237
0.332	0.0291
0.334	0.0363
0.3359	0.0412
0.3379	0.0425
0.3398	0.0419
0.3418	0.0417
0.3438	0.0412
0.3457	0.0413
0.3477	0.0423
0.3496	0.0463
0.3516	0.0511
0.3535	0.055
0.3555	0.0536
0.3574	0.0469
0.3594	0.0395
0.3613	0.0337
0.3633	0.0279
0.3652	0.0179
0.3672	0.00761
0.3691	0.00234
0.3711	0.00598
0.373	0.012
0.375	0.0163
0.377	0.0155
0.3789	0.0147
0.3809	0.0155
0.3828	0.0155
0.3848	0.0111
0.3867	0.00644
0.3887	0.00484
0.3906	0.00648
0.3926	0.00319
0.3945	-0.00681
0.3965	-0.0198
0.3984	-0.0253
0.4004	-0.019
0.4023	-0.00824
0.4043	0.000652
0.4063	0.00443
0.4082	0.00703
0.4102	0.00863
0.4121	0.00913
0.4141	0.00714
0.416	0.00698
0.418	0.0112
0.4199	0.0174
0.4219	0.0182
0.4238	0.0117
0.4258	0.00608
0.4277	0.00705
0.4297	0.0179
0.4316	0.0315
0.4336	0.0419
0.4355	0.0493
0.4375	0.0552
0.4395	0.0584
0.4414	0.0557
0.4434	0.0467
0.4453	0.0356
0.4473	0.0283
0.4492	0.026
0.4512	0.0251
0.4531	0.0233
0.4551	0.0233
0.457	0.0245
0.459	0.0225
0.4609	0.0141
0.4629	0.00551
0.4648	0.00235
0.4668	0.00628
0.4688	0.0111
0.4707	0.0113
0.4727	0.00512
0.4746	-0.000225
0.4766	-0.00257
0.4785	-0.00538
0.4805	-0.00917
0.4824	-0.0117
0.4844	-0.0098
0.4863	-0.0054
0.4883	-0.000684
0.4902	0.00282
0.4922	0.00319
0.4941	0.00277
0.4961	0.00423
0.498	0.00895
0.5	0.016
0.502	0.0212
0.5039	0.0241
0.5059	0.0251
0.5078	0.0258
0.5098	0.0263
0.5117	0.0273
0.5137	0.0305
0.5156	0.0373
0.5176	0.046
0.5195	0.0536
0.5215	0.0564
0.5234	0.0538
0.5254	0.0437
0.5273	0.0279
0.5293	0.0102
0.5313	-0.00211
0.5332	-0.00662
0.5352	-0.00262
0.5371	0.00702
0.5391	0.017
0.541	0.022
0.543	0.0203
0.5449	0.0134
0.5469	0.00142
0.5488	-0.0123
0.5508	-0.0246
0.5527	-0.0305
0.5547	-0.0251
0.5566	-0.0111
0.5586	0.00274
0.5605	0.0101
0.5625	0.0109
0.5645	0.0102
0.5664	0.00823
0.5684	0.00583
0.5703	0.000561
0.5723	-0.00351
0.5742	0.00227
0.5762	0.0176
0.5781	0.0345
0.5801	0.0427
0.582	0.0436
0.584	0.0462
0.5859	0.0505
0.5879	0.0494
0.5898	0.0375
0.5918	0.0259
0.5938	0.0216
0.5957	0.0255
0.5977	0.0278
0.5996	0.0253
0.6016	0.0191
0.6035	0.0121
0.6055	0.00729
0.6074	-0.0016
0.6094	-0.0106
0.6113	-0.0122
0.6133	-0.00175
0.6152	0.0122
0.6172	0.0158
0.6191	0.00492
0.6211	-0.0112
0.623	-0.0241
0.625	-0.0294
0.627	-0.0257
0.6289	-0.0121
0.6309	0.00678
0.6328	0.0273
0.6348	0.0419
0.6367	0.0388
0.6387	0.0212
0.6406	0.00103
0.6426	-0.00815
0.6445	-0.000674
0.6465	0.0186
0.6484	0.0425
0.6504	0.0643
0.6523	0.0757
0.6543	0.0708
0.6563	0.0491
0.6582	0.016
0.6602	-0.0124
0.6621	-0.02
0.6641	-0.00807
0.666	0.0103
0.668	0.0246
0.6699	0.0303
0.6719	0.0249
0.6738	0.009
0.6758	-0.0127
0.6777	-0.0327
0.6797	-0.0371
0.6816	-0.0257
0.6836	-0.00628
0.6855	0.00815
0.6875	0.013
0.6895	0.0128
0.6914	0.00486
0.6934	-0.00422
0.6953	-0.00977
0.6973	-0.00674
0.6992	0.00505
0.7012	0.0228
0.7031	0.04
0.7051	0.05
0.707	0.0498
0.709	0.0434
0.7109	0.0322
0.7129	0.0228
0.7148	0.0206
0.7168	0.0285
0.7188	0.0378
0.7207	0.0405
0.7227	0.0336
0.7246	0.0161
0.7266	-0.00456
0.7285	-0.0188
0.7305	-0.0201
0.7324	-0.00882
0.7344	0.00795
0.7363	0.0193
0.7383	0.0172
0.7402	-0.00081
0.7422	-0.024
0.7441	-0.0429
0.7461	-0.0424
0.748	-0.0193
0.75	0.0123
0.752	0.0354
0.7539	0.0409
0.7559	0.0291
0.7578	0.00944
0.7598	-0.00859
0.7617	-0.0144
0.7637	-0.00325
0.7656	0.0278
0.7676	0.0663
0.7695	0.0897
0.7715	0.083
0.7734	0.0497
0.7754	0.00741
0.7773	-0.0251
0.7793	-0.0326
0.7813	-0.0147
0.7832	0.0166
0.7852	0.0451
0.7871	0.0527
0.7891	0.0321
0.791	-0.00865
0.793	-0.0457
0.7949	-0.0594
0.7969	-0.0456
0.7988	-0.0122
0.8008	0.0202
0.8027	0.0362
0.8047	0.0303
0.8066	0.00691
0.8086	-0.0168
0.8105	-0.0254
0.8125	-0.015
0.8145	0.00866
0.8164	0.0402
0.8184	0.0642
0.8203	0.0663
0.8223	0.0472
0.8242	0.02
0.8262	0.00275
0.8281	0.00677
0.8301	0.0281
0.832	0.0463
0.834	0.0508
0.8359	0.0336
0.8379	-0.000497
0.8398	-0.032
0.8418	-0.0445
0.8438	-0.0282
0.8457	0.00193
0.8477	0.0274
0.8496	0.031
0.8516	0.0104
0.8535	-0.0222
0.8555	-0.0513
0.8574	-0.0565
0.8594	-0.0324
0.8613	0.00806
0.8633	0.0464
0.8652	0.0603
0.8672	0.0461
0.8691	0.0136
0.8711	-0.0146
0.873	-0.022
0.875	0.00079
0.877	0.0436
0.8789	0.0826
0.8809	0.0945
0.8828	0.0714
0.8848	0.0214
0.8867	-0.0253
0.8887	-0.0441
0.8906	-0.0328
0.8926	-0.00143
0.8945	0.03
0.8965	0.0449
0.8984	0.0345
0.9004	0.00272
0.9023	-0.0337
0.9043	-0.0552
0.9063	-0.0496
0.9082	-0.0261
0.9102	0.00524
0.9121	0.0283
0.9141	0.0332
0.916	0.0257
0.918	0.00993
0.9199	-0.00112
0.9219	-0.00289
0.9238	0.00714
0.9258	0.0246
0.9277	0.046
0.9297	0.061
0.9316	0.0609
0.9336	0.0471
0.9355	0.0239
0.9375	-0.00129
0.9395	-0.0159
0.9414	-0.0206
0.9434	-0.0109
0.9453	0.00585
0.9473	0.0212
0.9492	0.0213
0.9512	0.00473
0.9531	-0.0209
0.9551	-0.0409
0.957	-0.0439
0.959	-0.0304
0.9609	-0.00513
0.9629	0.0199
0.9648	0.0323
0.9668	0.0292
0.9688	0.0109
0.9707	-0.00526
0.9727	-0.00449
0.9746	0.0144
0.9766	0.0419
0.9785	0.064
0.9805	0.0674
0.9824	0.0518
0.9844	0.0243
0.9863	-0.00338
0.9883	-0.0157
0.9902	-0.0106
0.9922	0.00352
0.9941	0.0167
0.9961	0.0195
0.998	0.0101
1	-0.00723
1.002	-0.0238
1.0039	-0.033
1.0059	-0.031
1.0078	-0.0213
1.0098	-0.00543
1.0117	0.0078
1.0137	0.0166
1.0156	0.0191
1.0176	0.0149
1.0195	0.0084
1.0215	0.00588
1.0234	0.0102
1.0254	0.0248
1.0273	0.0461
1.0293	0.0622
1.0313	0.063
1.0332	0.0431
1.0352	0.00798
1.0371	-0.0204
1.0391	-0.0321
1.041	-0.0219
1.043	0.00175
1.0449	0.0237
1.0469	0.0289
1.0488	0.0125
1.0508	-0.017
1.0527	-0.0429
1.0547	-0.0505
1.0566	-0.0349
1.0586	-0.00301
1.0605	0.0256
1.0625	0.0396
1.0645	0.0332
1.0664	0.0185
1.0684	0.00569
1.0703	0.00439
1.0723	0.0157
1.0742	0.0345
1.0762	0.0516
1.0781	0.059
1.0801	0.0524
1.082	0.0286
1.084	-0.0012
1.0859	-0.0283
1.0879	-0.0378
1.0898	-0.0276
1.0918	-0.00244
1.0938	0.02
1.0957	0.0253
1.0977	0.00829
1.0996	-0.0201
1.1016	-0.0461
1.1035	-0.0518
1.1055	-0.0331
1.1074	0.00125
1.1094	0.0359
1.1113	0.0515
1.1133	0.0442
1.1152	0.0222
1.1172	0.00232
1.1191	0.00109
1.1211	0.0191
1.123	0.0439
1.125	0.0592
1.127	0.0507
1.1289	0.0262
1.1309	-0.00318
1.1328	-0.0264
1.1348	-0.0335
1.1367	-0.0252
1.1387	-0.00799
1.1406	0.00772
1.1426	0.0142
1.1445	0.00802
1.1465	-0.0098
1.1484	-0.0288
1.1504	-0.0354
1.1523	-0.0246
1.1543	0.00329
1.1563	0.0323
1.1582	0.0507
1.1602	0.0518
1.1621	0.0375
1.1641	0.02
1.166	0.00733
1.168	0.00908
1.1699	0.0228
1.1719	0.0364
1.1738	0.0385
1.1758	0.0197
1.1777	-0.0116
1.1797	-0.0347
1.1816	-0.0375
1.1836	-0.0236
1.1855	-0.00798
1.1875	0.00206
1.1895	0.00501
1.1914	0.000207
1.1934	-0.0089
1.1953	-0.0185
1.1973	-0.0184
1.1992	-0.0057
1.2012	0.0166
1.2031	0.0384
1.2051	0.0514
1.207	0.0545
1.209	0.049
1.2109	0.0324
1.2129	0.0118
1.2148	-0.00457
1.2168	-0.00601
1.2188	0.00608
1.2207	0.0151
1.2227	0.0124
1.2246	-0.00211
1.2266	-0.0178
1.2285	-0.0264
1.2305	-0.0256
1.2324	-0.0202
1.2344	-0.0134
1.2363	-0.00423
1.2383	0.00406
1.2402	0.0107
1.2422	0.0142
1.2441	0.016
1.2461	0.0183
1.248	0.0221
1.25	0.0293
1.252	0.0372
1.2539	0.0429
1.2559	0.0393
1.2578	0.0241
1.2598	0.00274
1.2617	-0.0182
1.2637	-0.0272
1.2656	-0.0202
1.2676	-0.00513
1.2695	0.00285
1.2715	-0.000174
1.2734	-0.00989
1.2754	-0.0172
1.2773	-0.0173
1.2793	-0.0131
1.2813	-0.00425
1.2832	0.00874
1.2852	0.0233
1.2871	0.0372
1.2891	0.0443
1.291	0.0441
1.293	0.0363
1.2949	0.024
1.2969	0.014
1.2988	0.00871
1.3008	0.00932
1.3027	0.00542
1.3047	-0.0046
1.3066	-0.0149
1.3086	-0.0198
1.3105	-0.0205
1.3125	-0.0181
1.3145	-0.0148
1.3164	-0.0128
1.3184	-0.00891
1.3203	-0.00476
1.3223	0.00222
1.3242	0.00944
1.3262	0.0169
1.3281	0.0226
1.3301	0.0285
1.332	0.0378
1.334	0.0443
1.3359	0.0435
1.3379	0.0273
1.3398	0.0053
1.3418	-0.0115
1.3438	-0.0188
1.3457	-0.0154
1.3477	-0.00862
1.3496	-0.0055
1.3516	-0.00819
1.3535	-0.0089
1.3555	-0.0116
1.3574	-0.0145
1.3594	-0.0172
1.3613	-0.013
1.3633	0.0034
1.3652	0.0252
1.3672	0.0446
1.3691	0.0485
1.3711	0.0413
1.373	0.027
1.375	0.015
1.377	0.00856
1.3789	0.00867
1.3809	0.00961
1.3828	0.00121
1.3848	-0.0104
1.3867	-0.0191
1.3887	-0.0224
1.3906	-0.0233
1.3926	-0.0197
1.3945	-0.0143
1.3965	-0.00527
1.3984	0.00118
1.4004	0.00499
1.4023	0.00611
1.4043	0.0103
1.4063	0.0205
1.4082	0.035
1.4102	0.0481
1.4121	0.0497
1.4141	0.0361
1.416	0.0118
1.418	-0.00573
1.4199	-0.0116
1.4219	-0.0106
1.4238	-0.00971
1.4258	-0.0128
1.4277	-0.0162
1.4297	-0.0129
1.4316	-0.00954
1.4336	-0.0101
1.4355	-0.0138
1.4375	-0.0125
1.4395	0.00107
1.4414	0.0188
1.4434	0.0341
1.4453	0.0382
1.4473	0.0394
1.4492	0.0362
1.4512	0.0291
1.4531	0.0152
1.4551	0.00143
1.457	-0.00961
1.459	-0.0163
1.4609	-0.0161
1.4629	-0.0116
1.4648	-0.0106
1.4668	-0.0128
1.4688	-0.0148
1.4707	-0.0136
1.4727	-0.00768
1.4746	-0.000574
1.4766	0.00657
1.4785	0.0146
1.4805	0.0285
1.4824	0.0427
1.4844	0.0525
1.4863	0.0447
1.4883	0.0251
1.4902	0.00299
1.4922	-0.00674
1.4941	-0.0105
1.4961	-0.0142
1.498	-0.0182
1.5	-0.0182
1.502	-0.0145
1.5039	-0.00905
1.5059	-0.00895
1.5078	-0.0121
1.5098	-0.0145
1.5117	-0.00555
1.5137	0.0111
1.5156	0.0283
1.5176	0.0361
1.5195	0.039
1.5215	0.0402
1.5234	0.0371
1.5254	0.0213
1.5273	-0.00059
1.5293	-0.0182
1.5313	-0.0229
1.5332	-0.0157
1.5352	-0.00863
1.5371	-0.0117
1.5391	-0.014
1.541	-0.0125
1.543	-0.00655
1.5449	-0.0043
1.5469	-0.00524
1.5488	0.00203
1.5508	0.0221
1.5527	0.045
1.5547	0.056
1.5566	0.0465
1.5586	0.0244
1.5605	0.00432
1.5625	-0.00379
1.5645	-0.00915
1.5664	-0.0207
1.5684	-0.0262
1.5703	-0.0224
1.5723	-0.0113
1.5742	-0.00368
1.5762	-0.00569
1.5781	-0.0109
1.5801	-0.0109
1.582	-0.0009
1.584	0.0128
1.5859	0.024
1.5879	0.0354
1.5898	0.0479
1.5918	0.0515
1.5938	0.0358
1.5957	0.00413
1.5977	-0.0183
1.5996	-0.025
1.6016	-0.0167
1.6035	-0.0111
1.6055	-0.0155
1.6074	-0.0174
1.6094	-0.00986
1.6113	-0.000446
1.6133	-0.00132
1.6152	-0.00755
1.6172	-0.00268
1.6191	0.0179
1.6211	0.0415
1.623	0.0517
1.625	0.0429
1.627	0.0254
1.6289	0.00955
1.6309	-0.00121
1.6328	-0.0185
1.6348	-0.0364
1.6367	-0.0372
1.6387	-0.0193
1.6406	8.05e-05
1.6426	0.00468
1.6445	-0.00397
1.6465	-0.00925
1.6484	-0.00264
1.6504	0.00798
1.6523	0.0169
1.6543	0.0257
1.6563	0.0441
1.6582	0.0573
1.6602	0.046
1.6621	0.013
1.6641	-0.0181
1.666	-0.0301
1.668	-0.0264
1.6699	-0.0228
1.6719	-0.0244
1.6738	-0.0176
1.6758	-0.00181
1.6777	0.00934
1.6797	0.00319
1.6816	-0.00836
1.6836	-0.0029
1.6855	0.0201
1.6875	0.0434
1.6895	0.051
1.6914	0.041
1.6934	0.0238
1.6953	0.0078
1.6973	-0.00988
1.6992	-0.0337
1.7012	-0.0449
1.7031	-0.0343
1.7051	-0.00925
1.707	0.01
1.709	0.00948
1.7109	-0.00143
1.7129	-0.00694
1.7148	0.00128
1.7168	0.0155
1.7188	0.0295
1.7207	0.043
1.7227	0.0497
1.7246	0.0402
1.7266	0.0143
1.7285	-0.0134
1.7305	-0.0356
1.7324	-0.0403
1.7344	-0.0343
1.7363	-0.021
1.7383	-0.00527
1.7402	0.00778
1.7422	0.0108
1.7441	0.00371
1.7461	-0.00195
1.748	0.00249
1.75	0.0198
1.752	0.0416
1.7539	0.055
1.7559	0.0446
1.7578	0.0184
1.7598	-0.00942
1.7617	-0.0324
1.7637	-0.0418
1.7656	-0.0402
1.7676	-0.0255
1.7695	-0.0027
1.7715	0.0157
1.7734	0.0168
1.7754	0.00642
1.7773	-0.000621
1.7793	0.00569
1.7813	0.0215
1.7832	0.0369
1.7852	0.0412
1.7871	0.033
1.7891	0.021
1.791	-0.00138
1.793	-0.0328
1.7949	-0.0555
1.7969	-0.0531
1.7988	-0.0265
1.8008	0.00494
1.8027	0.0205
1.8047	0.0197
1.8066	0.0144
1.8086	0.0136
1.8105	0.0147
1.8125	0.019
1.8145	0.0288
1.8164	0.035
1.8184	0.0308
1.8203	0.0142
1.8223	-0.0121
1.8242	-0.0364
1.8262	-0.0482
1.8281	-0.044
1.8301	-0.0227
1.832	0.00189
1.834	0.0168
1.8359	0.0205
1.8379	0.0214
1.8398	0.0236
1.8418	0.0239
1.8438	0.0227
1.8457	0.0197
1.8477	0.0175
1.8496	0.0159
1.8516	0.000437
1.8535	-0.0258
1.8555	-0.0439
1.8574	-0.0418
1.8594	-0.0224
1.8613	-0.00434
1.8633	0.00795
1.8652	0.0163
1.8672	0.0282
1.8691	0.0345
1.8711	0.0336
1.873	0.0272
1.875	0.0194
1.877	0.0102
1.8789	0.00337
1.8809	-0.00877
1.8828	-0.0238
1.8848	-0.034
1.8867	-0.035
1.8887	-0.0237
1.8906	-0.0083
1.8926	0.00278
1.8945	0.011
1.8965	0.0231
1.8984	0.0344
1.9004	0.0385
1.9023	0.0339
1.9043	0.0214
1.9063	0.00786
1.9082	-0.00291
1.9102	-0.0185
1.9121	-0.0301
1.9141	-0.0348
1.916	-0.0231
1.918	-0.00683
1.9199	0.00243
1.9219	0.0014
1.9238	0.00857
1.9258	0.0244
1.9277	0.0385
1.9297	0.0393
1.9316	0.0282
1.9336	0.0137
1.9355	0.00552
1.9375	-0.00638
1.9395	-0.0297
1.9414	-0.0472
1.9434	-0.0435
1.9453	-0.0176
1.9473	0.00662
1.9492	0.0118
1.9512	0.00873
1.9531	0.0164
1.9551	0.0324
1.957	0.0384
1.959	0.0322
1.9609	0.0179
1.9629	0.00972
1.9648	0.00388
1.9668	-0.0149
1.9688	-0.0383
1.9707	-0.0479
1.9727	-0.0337
1.9746	-0.00636
1.9766	0.00876
1.9785	0.0102
1.9805	0.0156
1.9824	0.0306
1.9844	0.0404
1.9863	0.0347
1.9883	0.0166
1.9902	0.00221
1.9922	0.00141
1.9941	-0.00915
1.9961	-0.0303
1.998	-0.0467
2	-0.0356
2.002	-0.00785
2.0039	0.0114
2.0059	0.0131
2.0078	0.016
2.0098	0.0299
2.0117	0.0432
2.0137	0.0413
2.0156	0.0203
2.0176	0.000156
2.0195	-0.00668
2.0215	-0.0143
2.0234	-0.0307
2.0254	-0.0449
2.0273	-0.0367
2.0293	-0.00773
2.0313	0.0131
2.0332	0.0141
2.0352	0.013
2.0371	0.0251
2.0391	0.0395
2.041	0.0404
2.043	0.0217
2.0449	0.00255
2.0469	-0.00451
2.0488	-0.0156
2.0508	-0.0337
2.0527	-0.0476
2.0547	-0.0343
2.0566	-0.0044
2.0586	0.0173
2.0605	0.0221
2.0625	0.0249
2.0645	0.0334
2.0664	0.0408
2.0684	0.0309
2.0703	0.00691
2.0723	-0.00834
2.0742	-0.0119
2.0762	-0.0193
2.0781	-0.0338
2.0801	-0.0422
2.082	-0.0264
2.084	-0.00152
2.0859	0.0154
2.0879	0.0216
2.0898	0.0297
2.0918	0.039
2.0938	0.0425
2.0957	0.0288
2.0977	0.00497
2.0996	-0.0132
2.1016	-0.025
2.1035	-0.0336
2.1055	-0.0375
2.1074	-0.0273
2.1094	-0.0085
2.1113	0.00559
2.1133	0.014
2.1152	0.0242
2.1172	0.0342
2.1191	0.0378
2.1211	0.0295
2.123	0.013
2.125	0.000363
2.127	-0.0149
2.1289	-0.0357
2.1309	-0.0492
2.1328	-0.0386
2.1348	-0.0118
2.1367	0.0101
2.1387	0.0177
2.1406	0.0264
2.1426	0.0399
2.1445	0.0453
2.1465	0.0319
2.1484	0.00699
2.1504	-0.00892
2.1523	-0.0148
2.1543	-0.0257
2.1563	-0.039
2.1582	-0.0389
2.1602	-0.0178
2.1621	0.00391
2.1641	0.0141
2.166	0.0205
2.168	0.0335
2.1699	0.0415
2.1719	0.0358
2.1738	0.015
2.1758	-0.00259
2.1777	-0.0145
2.1797	-0.0289
2.1816	-0.0436
2.1836	-0.0389
2.1855	-0.0145
2.1875	0.00601
2.1895	0.0153
2.1914	0.0234
2.1934	0.038
2.1953	0.0467
2.1973	0.0345
2.1992	0.00781
2.2012	-0.00929
2.2031	-0.0181
2.2051	-0.0311
2.207	-0.0457
2.209	-0.0416
2.2109	-0.0154
2.2129	0.00879
2.2148	0.0194
2.2168	0.0268
2.2188	0.0381
2.2207	0.0443
2.2227	0.0325
2.2246	0.00845
2.2266	-0.00878
2.2285	-0.0227
2.2305	-0.0359
2.2324	-0.0449
2.2344	-0.032
2.2363	-0.00685
2.2383	0.00949
2.2402	0.0192
2.2422	0.0322
2.2441	0.0443
2.2461	0.0419
2.248	0.0185
2.25	-0.00434
2.252	-0.0146
2.2539	-0.0274
2.2559	-0.0431
2.2578	-0.047
2.2598	-0.0247
2.2617	0.0048
2.2637	0.0204
2.2656	0.0271
2.2676	0.0382
2.2695	0.047
2.2715	0.0379
2.2734	0.0109
2.2754	-0.0119
2.2773	-0.0268
2.2793	-0.0377
2.2813	-0.0439
2.2832	-0.0332
2.2852	-0.00916
2.2871	0.00901
2.2891	0.0226
2.291	0.0356
2.293	0.0427
2.2949	0.0368
2.2969	0.0158
2.2988	-0.00224
2.3008	-0.0132
2.3027	-0.0295
2.3047	-0.0452
2.3066	-0.0419
2.3086	-0.0156
2.3105	0.00758
2.3125	0.0185
2.3145	0.0299
2.3164	0.045
2.3184	0.049
2.3203	0.0279
2.3223	-0.001
2.3242	-0.0185
2.3262	-0.0324
2.3281	-0.0445
2.3301	-0.0457
2.332	-0.0245
2.334	0.00176
2.3359	0.0187
2.3379	0.0326
2.3398	0.0439
2.3418	0.0445
2.3438	0.0278
2.3457	0.0039
2.3477	-0.0103
2.3496	-0.0247
2.3516	-0.0413
2.3535	-0.0468
2.3555	-0.0258
2.3574	0.00171
2.3594	0.0164
2.3613	0.0281
2.3633	0.0442
2.3652	0.0498
2.3672	0.0319
2.3691	0.000751
2.3711	-0.018
2.373	-0.0309
2.375	-0.0442
2.377	-0.0473
2.3789	-0.0279
2.3809	0.000856
2.3828	0.0205
2.3848	0.0333
2.3867	0.0449
2.3887	0.0475
2.3906	0.0308
2.3926	0.00288
2.3945	-0.0158
2.3965	-0.0309
2.3984	-0.0453
2.4004	-0.0463
2.4023	-0.022
2.4043	0.00284
2.4063	0.0166
2.4082	0.0312
2.4102	0.0456
2.4121	0.0467
2.4141	0.0245
2.416	-0.00235
2.418	-0.0186
2.4199	-0.0325
2.4219	-0.0456
2.4238	-0.0425
2.4258	-0.0173
2.4277	0.00813
2.4297	0.0235
2.4316	0.0374
2.4336	0.0499
2.4355	0.0455
2.4375	0.0175
2.4395	-0.00889
2.4414	-0.0255
2.4434	-0.0417
2.4453	-0.0518
2.4473	-0.0388
2.4492	-0.00801
2.4512	0.0143
2.4531	0.0285
2.4551	0.0428
2.457	0.0499
2.459	0.0365
2.4609	0.00601
2.4629	-0.0146
2.4648	-0.0279
2.4668	-0.042
2.4688	-0.0462
2.4707	-0.0258
2.4727	0.00187
2.4746	0.0181
2.4766	0.0335
2.4785	0.0486
2.4805	0.0502
2.4824	0.0249
2.4844	-0.00542
2.4863	-0.0235
2.4883	-0.0407
2.4902	-0.0539
2.4922	-0.0448
2.4941	-0.0133
2.4961	0.0149
2.498	0.0318
2.5	0.0441
2.502	0.0518
2.5039	0.0397
2.5059	0.00882
2.5078	-0.0162
2.5098	-0.0327
2.5117	-0.0469
2.5137	-0.0483
2.5156	-0.0235
2.5176	0.00517
2.5195	0.0198
2.5215	0.0348
2.5234	0.0484
2.5254	0.0461
2.5273	0.0198
2.5293	-0.00879
2.5313	-0.0255
2.5332	-0.0412
2.5352	-0.0511
2.5371	-0.0372
2.5391	-0.00528
2.541	0.0175
2.543	0.0331
2.5449	0.047
2.5469	0.0535
2.5488	0.0338
2.5508	0.000412
2.5527	-0.0218
2.5547	-0.0405
2.5566	-0.0549
2.5586	-0.0483
2.5605	-0.0165
2.5625	0.0118
2.5645	0.0305
2.5664	0.0463
2.5684	0.0529
2.5703	0.0384
2.5723	0.00584
2.5742	-0.0191
2.5762	-0.0344
2.5781	-0.0486
2.5801	-0.0484
2.582	-0.0199
2.584	0.0102
2.5859	0.0262
2.5879	0.0398
2.5898	0.0524
2.5918	0.0458
2.5938	0.014
2.5957	-0.0145
2.5977	-0.0334
2.5996	-0.0509
2.6016	-0.056
2.6035	-0.0325
2.6055	0.00208
2.6074	0.0264
2.6094	0.0445
2.6113	0.0565
2.6133	0.0511
2.6152	0.0195
2.6172	-0.0126
2.6191	-0.0337
2.6211	-0.0514
2.623	-0.0577
2.625	-0.0324
2.627	0.0046
2.6289	0.0255
2.6309	0.0405
2.6328	0.0526
2.6348	0.048
2.6367	0.0176
2.6387	-0.0134
2.6406	-0.0328
2.6426	-0.049
2.6445	-0.0542
2.6465	-0.0329
2.6484	0.00258
2.6504	0.0258
2.6523	0.0412
2.6543	0.0541
2.6563	0.0514
2.6582	0.0224
2.6602	-0.00999
2.6621	-0.0314
2.6641	-0.052
2.666	-0.0605
2.668	-0.0368
2.6699	-0.000134
2.6719	0.0238
2.6738	0.044
2.6758	0.0579
2.6777	0.0524
2.6797	0.0199
2.6816	-0.015
2.6836	-0.0366
2.6855	-0.0535
2.6875	-0.0579
2.6895	-0.031
2.6914	0.00735
2.6934	0.0308
2.6953	0.0466
2.6973	0.0577
2.6992	0.049
2.7012	0.0139
2.7031	-0.0172
2.7051	-0.0391
2.707	-0.0585
2.709	-0.0595
2.7109	-0.029
2.7129	0.00851
2.7148	0.0328
2.7168	0.0509
2.7188	0.0606
2.7207	0.0472
2.7227	0.0104
2.7246	-0.0213
2.7266	-0.0425
2.7285	-0.0597
2.7305	-0.0557
2.7324	-0.0186
2.7344	0.0151
2.7363	0.0355
2.7383	0.0536
2.7402	0.0594
2.7422	0.037
2.7441	-0.00177
2.7461	-0.0291
2.748	-0.0507
2.75	-0.0635
2.752	-0.0485
2.7539	-0.0082
2.7559	0.0249
2.7578	0.0449
2.7598	0.0593
2.7617	0.0588
2.7637	0.0274
2.7656	-0.0107
2.7676	-0.0357
2.7695	-0.0559
2.7715	-0.065
2.7734	-0.0385
2.7754	0.00249
2.7773	0.0283
2.7793	0.0491
2.7813	0.0619
2.7832	0.0513
2.7852	0.0138
2.7871	-0.0208
2.7891	-0.0441
2.791	-0.0615
2.793	-0.0583
2.7949	-0.0216
2.7969	0.0158
2.7988	0.0393
2.8008	0.0582
2.8027	0.0648
2.8047	0.0405
2.8066	-0.00245
2.8086	-0.0325
2.8105	-0.0579
2.8125	-0.0706
2.8145	-0.0495
2.8164	-0.0051
2.8184	0.0284
2.8203	0.0526
2.8223	0.0672
2.8242	0.0592
2.8262	0.0203
2.8281	-0.0203
2.8301	-0.0471
2.832	-0.0657
2.834	-0.0619
2.8359	-0.0219
2.8379	0.0174
2.8398	0.0402
2.8418	0.0588
2.8438	0.0641
2.8457	0.0371
2.8477	-0.00507
2.8496	-0.0356
2.8516	-0.0599
2.8535	-0.0691
2.8555	-0.045
2.8574	0.000634
2.8594	0.0322
2.8613	0.0532
2.8633	0.0674
2.8652	0.0569
2.8672	0.0155
2.8691	-0.0236
2.8711	-0.0513
2.873	-0.0719
2.875	-0.0626
2.877	-0.0171
2.8789	0.0206
2.8809	0.0457
2.8828	0.0648
2.8848	0.0644
2.8867	0.0308
2.8887	-0.0126
2.8906	-0.0444
2.8926	-0.0681
2.8945	-0.0705
2.8965	-0.0326
2.8984	0.014
2.9004	0.0435
2.9023	0.0643
2.9043	0.0719
2.9063	0.0451
2.9082	-0.00189
2.9102	-0.038
2.9121	-0.0669
2.9141	-0.0791
2.916	-0.05
2.918	0.00101
2.9199	0.0385
2.9219	0.0636
2.9238	0.0739
2.9258	0.0549
2.9277	0.00886
2.9297	-0.0319
2.9316	-0.0611
2.9336	-0.0788
2.9355	-0.0582
2.9375	-0.00421
2.9395	0.0358
2.9414	0.0609
2.9434	0.0741
2.9453	0.0589
2.9473	0.0125
2.9492	-0.0279
2.9512	-0.0599
2.9531	-0.0814
2.9551	-0.0659
2.957	-0.0134
2.959	0.0338
2.9609	0.0616
2.9629	0.0761
2.9648	0.0646
2.9668	0.0207
2.9688	-0.0243
2.9707	-0.0563
2.9727	-0.0808
2.9746	-0.0712
2.9766	-0.018
2.9785	0.0297
2.9805	0.06
2.9824	0.0765
2.9844	0.0646
2.9863	0.0216
2.9883	-0.022
2.9902	-0.0556
2.9922	-0.0816
2.9941	-0.0734
2.9961	-0.0208
2.998	0.0316
3	0.0643
3.002	0.0815
3.0039	0.0706
3.0059	0.0234
3.0078	-0.0238
3.0098	-0.0598
3.0117	-0.09
3.0137	-0.0795
3.0156	-0.0231
3.0176	0.0331
3.0195	0.0707
3.0215	0.0865
3.0234	0.0693
3.0254	0.0198
3.0273	-0.0281
3.0293	-0.064
3.0313	-0.0907
3.0332	-0.075
3.0352	-0.0133
3.0371	0.0429
3.0391	0.0783
3.041	0.0908
3.043	0.0635
3.0449	0.00651
3.0469	-0.0392
3.0488	-0.0754
3.0508	-0.0964
3.0527	-0.0692
3.0547	-0.00358
3.0566	0.0533
3.0586	0.0869
3.0605	0.0914
3.0625	0.0546
3.0645	-0.00404
3.0664	-0.0471
3.0684	-0.0791
3.0703	-0.0956
3.0723	-0.0569
3.0742	0.00941
3.0762	0.0612
3.0781	0.0917
3.0801	0.0869
3.082	0.0387
3.084	-0.0172
3.0859	-0.0559
3.0879	-0.088
3.0898	-0.0916
3.0918	-0.0418
3.0938	0.025
3.0957	0.0741
3.0977	0.1
3.0996	0.0837
3.1016	0.0252
3.1035	-0.0293
3.1055	-0.0672
3.1074	-0.1
3.1094	-0.0888
3.1113	-0.0264
3.1133	0.0402
3.1152	0.0899
3.1172	0.105
3.1191	0.0687
3.1211	0.00439
3.123	-0.0453
3.125	-0.0824
3.127	-0.104
3.1289	-0.0699
3.1309	0.00178
3.1328	0.0653
3.1348	0.107
3.1367	0.104
3.1387	0.0431
3.1406	-0.0234
3.1426	-0.0689
3.1445	-0.105
3.1465	-0.101
3.1484	-0.0417
3.1504	0.0334
3.1523	0.0928
3.1543	0.117
3.1563	0.0834
3.1582	0.00949
3.1602	-0.0497
3.1621	-0.0883
3.1641	-0.111
3.166	-0.0764
3.168	-0.00374
3.1699	0.0638
3.1719	0.113
3.1738	0.11
3.1758	0.045
3.1777	-0.0283
3.1797	-0.076
3.1816	-0.108
3.1836	-0.0988
3.1855	-0.038
3.1875	0.0364
3.1895	0.0962
3.1914	0.124
3.1934	0.086
3.1953	0.00526
3.1973	-0.0566
3.1992	-0.0996
3.2012	-0.115
3.2031	-0.0703
3.2051	0.00239
3.207	0.0724
3.209	0.121
3.2109	0.109
3.2129	0.0388
3.2148	-0.0358
3.2168	-0.085
3.2188	-0.116
3.2207	-0.0936
3.2227	-0.0235
3.2246	0.0506
3.2266	0.111
3.2285	0.128
3.2305	0.0687
3.2324	-0.015
3.2344	-0.0763
3.2363	-0.12
3.2383	-0.112
3.2402	-0.0487
3.2422	0.0316
3.2441	0.102
3.2461	0.134
3.248	0.0944
3.25	0.00829
3.252	-0.0634
3.2539	-0.113
3.2559	-0.124
3.2578	-0.066
3.2598	0.0146
3.2617	0.0886
3.2637	0.135
3.2656	0.108
3.2676	0.0235
3.2695	-0.0551
3.2715	-0.11
3.2734	-0.128
3.2754	-0.0805
3.2773	0.0022
3.2793	0.0799
3.2813	0.135
3.2832	0.124
3.2852	0.0424
3.2871	-0.0436
3.2891	-0.105
3.291	-0.135
3.293	-0.0927
3.2949	-0.0106
3.2969	0.0705
3.2988	0.133
3.3008	0.13
3.3027	0.0535
3.3047	-0.0371
3.3066	-0.104
3.3086	-0.137
3.3105	-0.0997
3.3125	-0.0139
3.3145	0.07
3.3164	0.135
3.3184	0.139
3.3203	0.06
3.3223	-0.0349
3.3242	-0.11
3.3262	-0.148
3.3281	-0.107
3.3301	-0.0172
3.332	0.0736
3.334	0.141
3.3359	0.144
3.3379	0.0646
3.3398	-0.0375
3.3418	-0.114
3.3438	-0.154
3.3457	-0.11
3.3477	-0.012
3.3496	0.0803
3.3516	0.15
3.3535	0.147
3.3555	0.0587
3.3574	-0.0458
3.3594	-0.128
3.3613	-0.163
3.3633	-0.111
3.3652	-0.00505
3.3672	0.096
3.3691	0.164
3.3711	0.153
3.373	0.0552
3.375	-0.0555
3.377	-0.139
3.3789	-0.174
3.3809	-0.108
3.3828	0.00488
3.3848	0.111
3.3867	0.177
3.3887	0.15
3.3906	0.0415
3.3926	-0.0738
3.3945	-0.159
3.3965	-0.178
3.3984	-0.0969
3.4004	0.0273
3.4023	0.136
3.4043	0.194
3.4063	0.147
3.4082	0.0208
3.4102	-0.0982
3.4121	-0.186
3.4141	-0.185
3.416	-0.0817
3.418	0.0522
3.4199	0.166
3.4219	0.207
3.4238	0.134
3.4258	-0.00531
3.4277	-0.129
3.4297	-0.207
3.4316	-0.181
3.4336	-0.0526
3.4355	0.0894
3.4375	0.199
3.4395	0.215
3.4414	0.107
3.4434	-0.0424
3.4453	-0.17
3.4473	-0.231
3.4492	-0.166
3.4512	-0.0163
3.4531	0.136
3.4551	0.234
3.457	0.213
3.459	0.0731
3.4609	-0.0867
3.4629	-0.211
3.4648	-0.244
3.4668	-0.135
3.4688	0.0317
3.4707	0.188
3.4727	0.26
3.4746	0.189
3.4766	0.0225
3.4785	-0.145
3.4805	-0.255
3.4824	-0.236
3.4844	-0.0865
3.4863	0.1
3.4883	0.247
3.4902	0.276
3.4922	0.148
3.4941	-0.0428
3.4961	-0.213
3.498	-0.292
3.5	-0.208
3.502	-0.0219
3.5039	0.177
3.5059	0.299
3.5078	0.263
3.5098	0.086
3.5117	-0.122
3.5137	-0.281
3.5156	-0.3
3.5176	-0.149
3.5195	0.0698
3.5215	0.264
3.5234	0.331
3.5254	0.214
3.5273	-0.00252
3.5293	-0.221
3.5313	-0.34
3.5332	-0.271
3.5352	-0.0615
3.5371	0.179
3.5391	0.342
3.541	0.324
3.543	0.134
3.5449	-0.112
3.5469	-0.319
3.5488	-0.36
3.5508	-0.198
3.5527	0.057
3.5547	0.295
3.5566	0.383
3.5586	0.264
3.5605	0.0189
3.5625	-0.241
3.5645	-0.391
3.5664	-0.321
3.5684	-0.08
3.5703	0.201
3.5723	0.391
3.5742	0.368
3.5762	0.158
3.5781	-0.121
3.5801	-0.362
3.582	-0.404
3.584	-0.226
3.5859	0.069
3.5879	0.337
3.5898	0.425
3.5918	0.288
3.5938	0.0203
3.5957	-0.267
3.5977	-0.426
3.5996	-0.343
3.6016	-0.0833
3.6035	0.23
3.6055	0.427
3.6074	0.388
3.6094	0.168
3.6113	-0.137
3.6133	-0.386
3.6152	-0.424
3.6172	-0.239
3.6191	0.0797
3.6211	0.366
3.623	0.448
3.625	0.305
3.627	0.0287
3.6289	-0.279
3.6309	-0.439
3.6328	-0.367
3.6348	-0.106
3.6367	0.234
3.6387	0.435
3.6406	0.405
3.6426	0.187
3.6445	-0.127
3.6465	-0.378
3.6484	-0.426
3.6504	-0.262
3.6523	0.0566
3.6543	0.348
3.6563	0.44
3.6582	0.326
3.6602	0.0435
3.6621	-0.264
3.6641	-0.423
3.666	-0.372
3.668	-0.114
3.6699	0.209
3.6719	0.402
3.6738	0.397
3.6758	0.197
3.6777	-0.112
3.6797	-0.348
3.6816	-0.406
3.6836	-0.251
3.6855	0.0546
3.6875	0.308
3.6895	0.402
3.6914	0.296
3.6934	0.0286
3.6953	-0.236
3.6973	-0.38
3.6992	-0.323
3.7012	-0.0848
3.7031	0.189
3.7051	0.353
3.707	0.346
3.709	0.144
3.7109	-0.117
3.7129	-0.308
3.7148	-0.343
3.7168	-0.18
3.7188	0.0617
3.7207	0.265
3.7227	0.336
3.7246	0.218
3.7266	-0.01
3.7285	-0.215
3.7305	-0.31
3.7324	-0.223
3.7344	-0.0295
3.7363	0.163
3.7383	0.282
3.7402	0.237
3.7422	0.0695
3.7441	-0.119
3.7461	-0.248
3.748	-0.222
3.75	-0.0889
3.752	0.0776
3.7539	0.21
3.7559	0.219
3.7578	0.108
3.7598	-0.0398
3.7617	-0.17
3.7637	-0.186
3.7656	-0.106
3.7676	0.0107
3.7695	0.139
3.7715	0.174
3.7734	0.112
3.7754	-0.0026
3.7773	-0.112
3.7793	-0.141
3.7813	-0.0908
3.7832	-0.0113
3.7852	0.0882
3.7871	0.128
3.7891	0.0889
3.791	0.0141
3.793	-0.0763
3.7949	-0.0958
3.7969	-0.0624
3.7988	-0.0106
3.8008	0.0581
3.8027	0.0783
3.8047	0.0468
3.8066	-0.00458
3.8086	-0.0559
3.8105	-0.0518
3.8125	-0.0136
3.8145	0.0138
3.8164	0.0497
3.8184	0.0368
3.8203	-0.0029
3.8223	-0.0361
3.8242	-0.0565
3.8262	-0.0192
3.8281	0.0251
3.8301	0.0476
3.832	0.0526
3.834	0.011
3.8359	-0.0444
3.8379	-0.0687
3.8398	-0.0622
3.8418	0.00768
3.8438	0.0646
3.8457	0.0803
3.8477	0.0624
3.8496	-0.0167
3.8516	-0.083
3.8535	-0.108
3.8555	-0.0689
3.8574	0.0262
3.8594	0.097
3.8613	0.113
3.8633	0.076
3.8652	-0.0286
3.8672	-0.11
3.8691	-0.135
3.8711	-0.0772
3.873	0.043
3.875	0.117
3.877	0.137
3.8789	0.0765
3.8809	-0.0406
3.8828	-0.13
3.8848	-0.152
3.8867	-0.0773
3.8887	0.0525
3.8906	0.133
3.8926	0.155
3.8945	0.0796
3.8965	-0.0485
3.8984	-0.141
3.9004	-0.165
3.9023	-0.0736
[truncated: 2,098 more rows]
