# Supplementary material for: Effect of the Supports’ Positions on the Vibration Characteristics of a Flexible Rotor Shafting
Source: Hindawi journal article supplement (doi:10.1155/2020/1592794), 2020-02-12
Supplement: f1 [file 1592794.f1.zip › 1592794.f1/test_data/Table11_9.xlsx]

## Sheet: Sheet1
Time t/s	vibration deformation amount u/mm
0	0.000816
0.002	0.00102
0.0039	0.000921
0.0059	0.00109
0.0078	0.000918
0.0098	0.000938
0.0117	0.00129
0.0137	0.00105
0.0156	0.00146
0.0176	0.00131
0.0195	0.00158
0.0215	0.0017
0.0234	0.00158
0.0254	0.00206
0.0273	0.00211
0.0293	0.00209
0.0313	0.00262
0.0332	0.00275
0.0352	0.00267
0.0371	0.0031
0.0391	0.00275
0.041	0.00289
0.043	0.00291
0.0449	0.00261
0.0469	0.00317
0.0488	0.0031
0.0508	0.00324
0.0527	0.00328
0.0547	0.0028
0.0566	0.00292
0.0586	0.00268
0.0605	0.00282
0.0625	0.00346
0.0645	0.00411
0.0664	0.00406
0.0684	0.00414
0.0703	0.00402
0.0723	0.00376
0.0742	0.0039
0.0762	0.00408
0.0781	0.00466
0.0801	0.00514
0.082	0.0054
0.084	0.00538
0.0859	0.00574
0.0879	0.00573
0.0898	0.00618
0.0918	0.00613
0.0938	0.00681
0.0957	0.00758
0.0977	0.00813
0.0996	0.00846
0.1016	0.00863
0.1035	0.00886
0.1055	0.00877
0.1074	0.00878
0.1094	0.00934
0.1113	0.0103
0.1133	0.0111
0.1152	0.0118
0.1172	0.0125
0.1191	0.012
0.1211	0.012
0.123	0.0124
0.125	0.0125
0.127	0.0135
0.1289	0.0141
0.1309	0.015
0.1328	0.0156
0.1348	0.0156
0.1367	0.0155
0.1387	0.0155
0.1406	0.0162
0.1426	0.0173
0.1445	0.0185
0.1465	0.0187
0.1484	0.0179
0.1504	0.0169
0.1523	0.0164
0.1543	0.0162
0.1563	0.0171
0.1582	0.0181
0.1602	0.0191
0.1621	0.0197
0.1641	0.0191
0.166	0.0182
0.168	0.0169
0.1699	0.0162
0.1719	0.0171
0.1738	0.0174
0.1758	0.018
0.1777	0.0189
0.1797	0.0196
0.1816	0.0191
0.1836	0.0183
0.1855	0.018
0.1875	0.0178
0.1895	0.0176
0.1914	0.0178
0.1934	0.0184
0.1953	0.0189
0.1973	0.0193
0.1992	0.0189
0.2012	0.0189
0.2031	0.0187
0.2051	0.0186
0.207	0.0187
0.209	0.0191
0.2109	0.0203
0.2129	0.0212
0.2148	0.022
0.2168	0.0234
0.2188	0.0243
0.2207	0.0253
0.2227	0.0244
0.2246	0.0221
0.2266	0.0209
0.2285	0.0217
0.2305	0.0241
0.2324	0.0269
0.2344	0.0284
0.2363	0.0292
0.2383	0.0294
0.2402	0.0283
0.2422	0.027
0.2441	0.028
0.2461	0.03
0.248	0.0318
0.25	0.0337
0.252	0.0358
0.2539	0.037
0.2559	0.0372
0.2578	0.0371
0.2598	0.0375
0.2617	0.0383
0.2637	0.0389
0.2656	0.0388
0.2676	0.0387
0.2695	0.0374
0.2715	0.0358
0.2734	0.0342
0.2754	0.0331
0.2773	0.0325
0.2793	0.0308
0.2813	0.0279
0.2832	0.0244
0.2852	0.0205
0.2871	0.0164
0.2891	0.0119
0.291	0.0082
0.293	0.00471
0.2949	0.00235
0.2969	0.000442
0.2988	-0.000505
0.3008	-0.000812
0.3027	-0.00241
0.3047	-0.0032
0.3066	-0.00242
0.3086	1.18e-05
0.3105	0.00275
0.3125	0.00552
0.3145	0.00703
0.3164	0.00839
0.3184	0.00914
0.3203	0.00933
0.3223	0.00942
0.3242	0.0113
0.3262	0.0129
0.3281	0.0137
0.3301	0.0139
0.332	0.0102
0.334	0.00396
0.3359	-0.00496
0.3379	-0.0125
0.3398	-0.0168
0.3418	-0.0174
0.3438	-0.0151
0.3457	-0.0122
0.3477	-0.00915
0.3496	-0.00808
0.3516	-0.00873
0.3535	-0.00935
0.3555	-0.00735
0.3574	-0.00248
0.3594	0.00312
0.3613	0.00798
0.3633	0.0119
0.3652	0.0146
0.3672	0.017
0.3691	0.0186
0.3711	0.0198
0.373	0.0195
0.375	0.0174
0.377	0.0127
0.3789	0.00781
0.3809	0.00565
0.3828	0.00525
0.3848	0.00995
0.3867	0.0156
0.3887	0.0214
0.3906	0.0254
0.3926	0.0268
0.3945	0.0266
0.3965	0.0278
0.3984	0.0305
0.4004	0.0356
0.4023	0.0409
0.4043	0.0443
0.4063	0.0431
0.4082	0.0382
0.4102	0.0311
0.4121	0.0237
0.4141	0.0178
0.416	0.0134
0.418	0.0108
0.4199	0.0084
0.4219	0.00622
0.4238	0.00507
0.4258	0.00352
0.4277	0.00237
0.4297	0.00179
0.4316	0.00376
0.4336	0.00495
0.4355	0.00596
0.4375	0.00448
0.4395	0.00254
0.4414	0.00113
0.4434	-0.000825
0.4453	-0.00203
0.4473	-0.0022
0.4492	-0.00286
0.4512	-0.00489
0.4531	-0.00754
0.4551	-0.0102
0.457	-0.0119
0.459	-0.0112
0.4609	-0.00668
0.4629	0.000965
0.4648	0.00917
0.4668	0.014
0.4688	0.0164
0.4707	0.0145
0.4727	0.0123
0.4746	0.0118
0.4766	0.0134
0.4785	0.0162
0.4805	0.0198
0.4824	0.0209
0.4844	0.0183
0.4863	0.0132
0.4883	0.00969
0.4902	0.0108
0.4922	0.0166
0.4941	0.027
0.4961	0.0377
0.498	0.0458
0.5	0.0469
0.502	0.0412
0.5039	0.0313
0.5059	0.0196
0.5078	0.00749
0.5098	-0.00166
0.5117	-0.00588
0.5137	-0.00583
0.5156	-0.00338
0.5176	-0.00295
0.5195	-0.00159
0.5215	0.00028
0.5234	0.00213
0.5254	0.00536
0.5273	0.0106
0.5293	0.0124
0.5313	0.00776
0.5332	-0.00324
0.5352	-0.0168
0.5371	-0.0276
0.5391	-0.0298
0.541	-0.024
0.543	-0.0123
0.5449	0.00137
0.5469	0.015
0.5488	0.0232
0.5508	0.0237
0.5527	0.0187
0.5547	0.00988
0.5566	0.00409
0.5586	0.00117
0.5605	0.00454
0.5625	0.0121
0.5645	0.0229
0.5664	0.0315
0.5684	0.0347
0.5703	0.0344
0.5723	0.0322
0.5742	0.0292
0.5762	0.0271
0.5781	0.026
0.5801	0.0264
0.582	0.0251
0.584	0.0204
0.5859	0.0119
0.5879	0.0038
0.5898	-0.00194
0.5918	-0.00706
0.5938	-0.00836
0.5957	-0.00649
0.5977	-0.00322
0.5996	0.000961
0.6016	0.00562
0.6035	0.00722
0.6055	0.00535
0.6074	-0.00237
0.6094	-0.0124
0.6113	-0.0212
0.6133	-0.024
0.6152	-0.0216
0.6172	-0.00915
0.6191	0.0069
0.6211	0.0204
0.623	0.026
0.625	0.0257
0.627	0.0219
0.6289	0.0145
0.6309	0.00584
0.6328	-0.000622
0.6348	-0.00072
0.6367	0.00703
0.6387	0.0196
0.6406	0.0339
0.6426	0.0456
0.6445	0.051
0.6465	0.0463
0.6484	0.0338
0.6504	0.016
0.6523	-0.00307
0.6543	-0.0154
0.6563	-0.0173
0.6582	-0.00997
0.6602	-0.000617
0.6621	0.00925
0.6641	0.0142
0.666	0.0137
0.668	0.00616
0.6699	-0.00566
0.6719	-0.0174
0.6738	-0.0241
0.6758	-0.0248
0.6777	-0.0173
0.6797	-0.0078
0.6816	0.0033
0.6836	0.0142
0.6855	0.0203
0.6875	0.0194
0.6895	0.0139
0.6914	0.00801
0.6934	0.0044
0.6953	0.00533
0.6973	0.0131
0.6992	0.0256
0.7012	0.0343
0.7031	0.0366
0.7051	0.033
0.707	0.0278
0.709	0.0222
0.7109	0.018
0.7129	0.018
0.7148	0.0183
0.7168	0.0162
0.7188	0.00904
0.7207	-0.00308
0.7227	-0.0159
0.7246	-0.0223
0.7266	-0.0201
0.7285	-0.00843
0.7305	0.00904
0.7324	0.0218
0.7344	0.0193
0.7363	0.00158
0.7383	-0.0234
0.7402	-0.0412
0.7422	-0.0441
0.7441	-0.0271
0.7461	0.0034
0.748	0.0317
0.75	0.0491
0.752	0.0477
0.7539	0.0303
0.7559	0.00326
0.7578	-0.0184
0.7598	-0.0229
0.7617	-0.00567
0.7637	0.0262
0.7656	0.0586
0.7676	0.075
0.7695	0.0672
0.7715	0.0381
0.7734	-0.0013
0.7754	-0.0352
0.7773	-0.044
0.7793	-0.0285
0.7813	0.000257
0.7832	0.0268
0.7852	0.0386
0.7871	0.0285
0.7891	0.00171
0.791	-0.0285
0.793	-0.0465
0.7949	-0.0443
0.7969	-0.0243
0.7988	0.00166
0.8008	0.0219
0.8027	0.031
0.8047	0.026
0.8066	0.0133
0.8086	0.000594
0.8105	-0.00418
0.8125	0.00249
0.8145	0.0154
0.8164	0.026
0.8184	0.0308
0.8203	0.0288
0.8223	0.0257
0.8242	0.0218
0.8262	0.0209
0.8281	0.0246
0.8301	0.0251
0.832	0.0162
0.834	0.000498
0.8359	-0.0171
0.8379	-0.0295
0.8398	-0.0294
0.8418	-0.0166
0.8438	0.00653
0.8457	0.0269
0.8477	0.0295
0.8496	0.00773
0.8516	-0.0244
0.8535	-0.0494
0.8555	-0.0554
0.8574	-0.0348
0.8594	0.00401
0.8613	0.0425
0.8633	0.0642
0.8652	0.0576
0.8672	0.0297
0.8691	-0.00448
0.8711	-0.027
0.873	-0.027
0.875	0.000871
0.877	0.0426
0.8789	0.0747
0.8809	0.0788
0.8828	0.0549
0.8848	0.00934
0.8867	-0.0343
0.8887	-0.054
0.8906	-0.0459
0.8926	-0.0161
0.8945	0.0169
0.8965	0.0375
0.8984	0.036
0.9004	0.0142
0.9023	-0.0191
0.9043	-0.0463
0.9063	-0.0528
0.9082	-0.0394
0.9102	-0.00986
0.9121	0.0225
0.9141	0.0419
0.916	0.0453
0.918	0.0328
0.9199	0.0139
0.9219	-0.00531
0.9238	-0.0144
0.9258	-0.011
0.9277	0.00973
0.9297	0.036
0.9316	0.056
0.9336	0.0587
0.9355	0.0456
0.9375	0.0143
0.9395	-0.0193
0.9414	-0.0418
0.9434	-0.0426
0.9453	-0.0248
0.9473	-5.91e-05
0.9492	0.023
0.9512	0.0308
0.9531	0.0195
0.9551	-0.0104
0.957	-0.0379
0.959	-0.0495
0.9609	-0.0391
0.9629	-0.0103
0.9648	0.0221
0.9668	0.0449
0.9688	0.0515
0.9707	0.0358
0.9727	0.0134
0.9746	-0.00431
0.9766	-0.00773
0.9785	0.00303
0.9805	0.0233
0.9824	0.0421
0.9844	0.049
0.9863	0.0401
0.9883	0.0168
0.9902	-0.00773
0.9922	-0.0235
0.9941	-0.0323
0.9961	-0.0271
0.998	-0.0132
1	0.00587
1.002	0.0165
1.0039	0.0134
1.0059	-0.00277
1.0078	-0.022
1.0098	-0.0363
1.0117	-0.0339
1.0137	-0.0154
1.0156	0.0101
1.0176	0.0324
1.0195	0.0442
1.0215	0.038
1.0234	0.0205
1.0254	-6.77e-05
1.0273	-0.00967
1.0293	0.00115
1.0313	0.0258
1.0332	0.047
1.0352	0.0532
1.0371	0.0359
1.0391	0.00356
1.041	-0.0278
1.043	-0.0443
1.0449	-0.0362
1.0469	-0.013
1.0488	0.0134
1.0508	0.0248
1.0527	0.0177
1.0547	-0.00554
1.0566	-0.0289
1.0586	-0.0408
1.0605	-0.0305
1.0625	-0.00368
1.0645	0.025
1.0664	0.0437
1.0684	0.0472
1.0703	0.0347
1.0723	0.0141
1.0742	-0.00666
1.0762	-0.0127
1.0781	0.000974
1.0801	0.0247
1.082	0.0474
1.084	0.0542
1.0859	0.0359
1.0879	0.0022
1.0898	-0.0356
1.0918	-0.0597
1.0938	-0.0547
1.0957	-0.0229
1.0977	0.0175
1.0996	0.0425
1.1016	0.0378
1.1035	0.00532
1.1055	-0.0353
1.1074	-0.0593
1.1094	-0.0506
1.1113	-0.016
1.1133	0.0299
1.1152	0.0641
1.1172	0.0713
1.1191	0.0513
1.1211	0.0133
1.123	-0.0177
1.125	-0.0249
1.127	-0.00727
1.1289	0.0252
1.1309	0.0499
1.1328	0.0518
1.1348	0.0321
1.1367	-0.00441
1.1387	-0.0423
1.1406	-0.06
1.1426	-0.0501
1.1445	-0.0197
1.1465	0.015
1.1484	0.0352
1.1504	0.0328
1.1523	0.00856
1.1543	-0.0183
1.1563	-0.0348
1.1582	-0.0293
1.1602	-0.00421
1.1621	0.0306
1.1641	0.0569
1.166	0.0587
1.168	0.036
1.1699	0.008
1.1719	-0.0107
1.1738	-0.0112
1.1758	0.00263
1.1777	0.0194
1.1797	0.0286
1.1816	0.0206
1.1836	-0.00453
1.1855	-0.028
1.1875	-0.0398
1.1895	-0.0345
1.1914	-0.0187
1.1934	0.000147
1.1953	0.0128
1.1973	0.0134
1.1992	0.00752
1.2012	-0.00067
1.2031	-0.00459
1.2051	-0.00132
1.207	0.00822
1.209	0.0244
1.2109	0.0387
1.2129	0.0429
1.2148	0.036
1.2168	0.0215
1.2188	0.00612
1.2207	-0.00378
1.2227	-0.00859
1.2246	-0.00331
1.2266	-2.15e-06
1.2285	-0.00108
1.2305	-0.00792
1.2324	-0.0144
1.2344	-0.0157
1.2363	-0.0162
1.2383	-0.0146
1.2402	-0.012
1.2422	-0.00585
1.2441	0.00189
1.2461	0.00859
1.248	0.0165
1.25	0.0216
1.252	0.0227
1.2539	0.019
1.2559	0.0121
1.2578	0.014
1.2598	0.0215
1.2617	0.0276
1.2637	0.0265
1.2656	0.0137
1.2676	-0.0015
1.2695	-0.0185
1.2715	-0.0272
1.2734	-0.0262
1.2754	-0.0147
1.2773	-0.0041
1.2793	0.000794
1.2813	0.00118
1.2832	-0.00297
1.2852	-0.00717
1.2871	-0.00565
1.2891	0.000106
1.291	0.0111
1.293	0.0227
1.2949	0.0334
1.2969	0.0363
1.2988	0.0281
1.3008	0.0172
1.3027	0.00611
1.3047	0.00446
1.3066	0.00507
1.3086	0.00725
1.3105	0.00479
1.3125	-0.00495
1.3145	-0.018
1.3164	-0.0263
1.3184	-0.0233
1.3203	-0.0147
1.3223	-0.0065
1.3242	-0.00309
1.3262	-0.00401
1.3281	-0.0014
1.3301	0.00235
1.332	0.00922
1.334	0.0161
1.3359	0.0234
1.3379	0.0271
1.3398	0.0266
1.3418	0.0253
1.3438	0.0221
1.3457	0.0175
1.3477	0.00758
1.3496	-0.00235
1.3516	-0.00651
1.3535	-0.0101
1.3555	-0.0133
1.3574	-0.0151
1.3594	-0.0163
1.3613	-0.0141
1.3633	-0.0103
1.3652	-0.0062
1.3672	-0.00173
1.3691	0.00386
1.3711	0.00701
1.373	0.0135
1.375	0.0191
1.377	0.0256
1.3789	0.0246
1.3809	0.0208
1.3828	0.0142
1.3848	0.0134
1.3867	0.0128
1.3887	0.00946
1.3906	0.00352
1.3926	-0.00546
1.3945	-0.0166
1.3965	-0.0227
1.3984	-0.0226
1.4004	-0.016
1.4023	-0.0104
1.4043	-0.00636
1.4063	-0.00492
1.4082	0.000382
1.4102	0.0065
1.4121	0.0136
1.4141	0.0175
1.416	0.0212
1.418	0.026
1.4199	0.0276
1.4219	0.0268
1.4238	0.0202
1.4258	0.012
1.4277	0.00333
1.4297	-0.00354
1.4316	-0.00907
1.4336	-0.0134
1.4355	-0.0182
1.4375	-0.0199
1.4395	-0.0158
1.4414	-0.0112
1.4434	-0.00583
1.4453	-0.00404
1.4473	-0.00237
1.4492	0.000607
1.4512	0.00852
1.4531	0.0179
1.4551	0.0257
1.457	0.028
1.459	0.0242
1.4609	0.0204
1.4629	0.0154
1.4648	0.011
1.4668	0.00106
1.4688	-0.00513
1.4707	-0.0124
1.4727	-0.0147
1.4746	-0.0173
1.4766	-0.0163
1.4785	-0.0174
1.4805	-0.0129
1.4824	-0.00828
1.4844	0.0005
1.4863	0.00814
1.4883	0.0156
1.4902	0.0199
1.4922	0.0231
1.4941	0.0258
1.4961	0.0246
1.498	0.0219
1.5	0.0129
1.502	0.00722
1.5039	0.00156
1.5059	-0.000968
1.5078	-0.00707
1.5098	-0.017
1.5117	-0.0236
1.5137	-0.0218
1.5156	-0.0179
1.5176	-0.0108
1.5195	-0.00604
1.5215	-0.00249
1.5234	0.00118
1.5254	0.00592
1.5273	0.0151
1.5293	0.0248
1.5313	0.0294
1.5332	0.0293
1.5352	0.0266
1.5371	0.0198
1.5391	0.00782
1.541	-0.00659
1.543	-0.0124
1.5449	-0.0115
1.5469	-0.0107
1.5488	-0.0113
1.5508	-0.0162
1.5527	-0.0184
1.5547	-0.0146
1.5566	-0.00843
1.5586	0.00128
1.5605	0.0088
1.5625	0.0169
1.5645	0.0232
1.5664	0.0274
1.5684	0.0261
1.5703	0.0213
1.5723	0.0125
1.5742	0.00638
1.5762	0.000149
1.5781	-0.00203
1.5801	-0.00701
1.582	-0.0153
1.584	-0.0188
1.5859	-0.019
1.5879	-0.0172
1.5898	-0.0155
1.5918	-0.0117
1.5938	-0.00272
1.5957	0.00797
1.5977	0.0175
1.5996	0.0244
1.6016	0.0296
1.6035	0.0299
1.6055	0.0266
1.6074	0.0204
1.6094	0.00889
1.6113	-0.00304
1.6133	-0.00886
1.6152	-0.00964
1.6172	-0.0123
1.6191	-0.0163
1.6211	-0.0193
1.623	-0.0191
1.625	-0.0141
1.627	-0.00614
1.6289	0.00102
1.6309	0.00671
1.6328	0.0131
1.6348	0.0213
1.6367	0.0273
1.6387	0.0279
1.6406	0.0234
1.6426	0.0168
1.6445	0.00752
1.6465	-0.00431
1.6484	-0.0114
1.6504	-0.0169
1.6523	-0.0188
1.6543	-0.0166
1.6563	-0.0165
1.6582	-0.0154
1.6602	-0.00953
1.6621	-0.000778
1.6641	0.00979
1.666	0.0161
1.668	0.0209
1.6699	0.0278
1.6719	0.0304
1.6738	0.0296
1.6758	0.0203
1.6777	0.00539
1.6797	-0.00616
1.6816	-0.0126
1.6836	-0.0134
1.6855	-0.0195
1.6875	-0.0205
1.6895	-0.0176
1.6914	-0.0131
1.6934	-0.00888
1.6953	-0.00422
1.6973	0.00108
1.6992	0.00855
1.7012	0.0167
1.7031	0.026
1.7051	0.031
1.707	0.0313
1.709	0.0252
1.7109	0.0132
1.7129	-0.00519
1.7148	-0.0172
1.7168	-0.0201
1.7188	-0.0187
1.7207	-0.0146
1.7227	-0.0163
1.7246	-0.0148
1.7266	-0.00875
1.7285	0.00189
1.7305	0.00836
1.7324	0.0135
1.7344	0.021
1.7363	0.0287
1.7383	0.0303
1.7402	0.0248
1.7422	0.014
1.7441	0.00217
1.7461	-0.00965
1.748	-0.0135
1.75	-0.0194
1.752	-0.0221
1.7539	-0.0197
1.7559	-0.0153
1.7578	-0.0114
1.7598	-0.00708
1.7617	-0.0006
1.7637	0.00864
1.7656	0.0189
1.7676	0.0291
1.7695	0.0354
1.7715	0.0345
1.7734	0.0259
1.7754	0.00793
1.7773	-0.0116
1.7793	-0.0186
1.7813	-0.0185
1.7832	-0.0165
1.7852	-0.0181
1.7871	-0.0173
1.7891	-0.0131
1.791	-0.00487
1.793	0.000789
1.7949	0.00422
1.7969	0.0124
1.7988	0.0244
1.8008	0.0331
1.8027	0.0324
1.8047	0.0249
1.8066	0.0105
1.8086	-0.00879
1.8105	-0.0201
1.8125	-0.0242
1.8145	-0.0234
1.8164	-0.0176
1.8184	-0.014
1.8203	-0.00986
1.8223	-0.00441
1.8242	0.00179
1.8262	0.00908
1.8281	0.0151
1.8301	0.0262
1.832	0.0344
1.834	0.038
1.8359	0.0281
1.8379	0.00642
1.8398	-0.0151
1.8418	-0.0245
1.8438	-0.0265
1.8457	-0.0283
1.8477	-0.0225
1.8496	-0.0135
1.8516	-0.000994
1.8535	0.005
1.8555	0.00627
1.8574	0.00614
1.8594	0.015
1.8613	0.025
1.8633	0.03
1.8652	0.031
1.8672	0.0243
1.8691	0.00629
1.8711	-0.0155
1.873	-0.0269
1.875	-0.0309
1.877	-0.0248
1.8789	-0.0224
1.8809	-0.0131
1.8828	0.000102
1.8848	0.0138
1.8867	0.0179
1.8887	0.0179
1.8906	0.0223
1.8926	0.0275
1.8945	0.0266
1.8965	0.0161
1.8984	0.002
1.9004	-0.0107
1.9023	-0.0141
1.9043	-0.025
1.9063	-0.0293
1.9082	-0.0279
1.9102	-0.0153
1.9121	-0.00481
1.9141	0.00502
1.916	0.0107
1.918	0.0216
1.9199	0.0303
1.9219	0.0338
1.9238	0.0301
1.9258	0.0218
1.9277	0.00339
1.9297	-0.0154
1.9316	-0.0242
1.9336	-0.0233
1.9355	-0.0207
1.9375	-0.0229
1.9395	-0.019
1.9414	-0.0055
1.9434	0.00949
1.9453	0.0136
1.9473	0.0163
1.9492	0.0257
1.9512	0.0339
1.9531	0.0295
1.9551	0.0172
1.957	-0.00205
1.959	-0.0159
1.9609	-0.0246
1.9629	-0.031
1.9648	-0.0287
1.9668	-0.0198
1.9688	-0.011
1.9707	0.000569
1.9727	0.00858
1.9746	0.019
1.9766	0.0262
1.9785	0.0323
1.9805	0.0322
1.9824	0.0295
1.9844	0.0113
1.9863	-0.0107
1.9883	-0.0253
1.9902	-0.0262
1.9922	-0.0276
1.9941	-0.0261
1.9961	-0.0212
1.998	-0.00469
2	0.0094
2.002	0.0144
2.0039	0.0145
2.0059	0.0272
2.0078	0.0348
2.0098	0.0325
2.0117	0.0191
2.0137	0.000618
2.0156	-0.0173
2.0176	-0.0263
2.0195	-0.0347
2.0215	-0.0288
2.0234	-0.0217
2.0254	-0.00776
2.0273	0.00478
2.0293	0.0174
2.0313	0.0252
2.0332	0.0302
2.0352	0.0281
2.0371	0.026
2.0391	0.0153
2.041	-0.00168
2.043	-0.0181
2.0449	-0.0203
2.0469	-0.023
2.0488	-0.0257
2.0508	-0.0271
2.0527	-0.0167
2.0547	-0.00216
2.0566	0.0107
2.0586	0.0159
2.0605	0.0293
2.0625	0.0418
2.0645	0.0409
2.0664	0.026
2.0684	0.00104
2.0703	-0.0221
2.0723	-0.0322
2.0742	-0.0354
2.0762	-0.0279
2.0781	-0.0192
2.0801	-0.00618
2.082	0.00791
2.084	0.016
2.0859	0.0195
2.0879	0.0219
2.0898	0.0257
2.0918	0.0255
2.0938	0.0191
2.0957	0.0024
2.0977	-0.0139
2.0996	-0.0222
2.1016	-0.0307
2.1035	-0.033
2.1055	-0.029
2.1074	-0.0136
2.1094	0.00472
2.1113	0.0204
2.1133	0.0299
2.1152	0.0415
2.1172	0.0417
2.1191	0.0318
2.1211	0.00905
2.123	-0.0169
2.125	-0.0316
2.127	-0.033
2.1289	-0.0295
2.1309	-0.0222
2.1328	-0.013
2.1348	0.00255
2.1367	0.0133
2.1387	0.0161
2.1406	0.0194
2.1426	0.0277
2.1445	0.0309
2.1465	0.0251
2.1484	0.00791
2.1504	-0.0132
2.1523	-0.0244
2.1543	-0.0341
2.1563	-0.0355
2.1582	-0.0294
2.1602	-0.0131
2.1621	0.00697
2.1641	0.0215
2.166	0.0315
2.168	0.0398
2.1699	0.0382
2.1719	0.0256
2.1738	0.00334
2.1758	-0.0208
2.1777	-0.0315
2.1797	-0.0318
2.1816	-0.0306
2.1836	-0.0229
2.1855	-0.011
2.1875	0.00341
2.1895	0.0123
2.1914	0.017
2.1934	0.0276
2.1953	0.0386
2.1973	0.037
2.1992	0.0228
2.2012	-0.00447
2.2031	-0.0268
2.2051	-0.0384
2.207	-0.0415
2.209	-0.0342
2.2109	-0.0179
2.2129	0.00622
2.2148	0.0226
2.2168	0.0311
2.2188	0.0337
2.2207	0.0333
2.2227	0.0214
2.2246	0.00539
2.2266	-0.0127
2.2285	-0.0229
2.2305	-0.026
2.2324	-0.0293
2.2344	-0.0283
2.2363	-0.0188
2.2383	-0.00349
2.2402	0.00995
2.2422	0.0216
2.2441	0.0378
2.2461	0.0491
2.248	0.0429
2.25	0.0176
2.252	-0.0147
2.2539	-0.0356
2.2559	-0.0463
2.2578	-0.0449
2.2598	-0.0327
2.2617	-0.00899
2.2637	0.0165
2.2656	0.0258
2.2676	0.0258
2.2695	0.0301
2.2715	0.0314
2.2734	0.0219
2.2754	0.00372
2.2773	-0.0149
2.2793	-0.021
2.2813	-0.0276
2.2832	-0.0345
2.2852	-0.0316
2.2871	-0.0157
2.2891	0.00528
2.291	0.0173
2.293	0.0313
2.2949	0.0484
2.2969	0.0501
2.2988	0.0306
2.3008	-0.00553
2.3027	-0.0335
2.3047	-0.0441
2.3066	-0.0464
2.3086	-0.0384
2.3105	-0.0162
2.3125	0.0115
2.3145	0.0281
2.3164	0.0259
2.3184	0.0289
2.3203	0.0349
2.3223	0.0289
2.3242	0.0117
2.3262	-0.0126
2.3281	-0.0242
2.3301	-0.0311
2.332	-0.0369
2.334	-0.0353
2.3359	-0.0166
2.3379	0.00888
2.3398	0.0229
2.3418	0.0336
2.3438	0.0466
2.3457	0.0462
2.3477	0.0241
2.3496	-0.0103
2.3516	-0.034
2.3535	-0.0412
2.3555	-0.0459
2.3574	-0.0391
2.3594	-0.015
2.3613	0.0148
2.3633	0.0321
2.3652	0.0314
2.3672	0.038
2.3691	0.0428
2.3711	0.0297
2.373	-8.34e-05
2.375	-0.0257
2.377	-0.0335
2.3789	-0.0381
2.3809	-0.0412
2.3828	-0.0296
2.3848	-0.000217
2.3867	0.0238
2.3887	0.029
2.3906	0.0363
2.3926	0.0468
2.3945	0.037
2.3965	0.00799
2.3984	-0.0256
2.4004	-0.0372
2.4023	-0.0409
2.4043	-0.044
2.4063	-0.0318
2.4082	-0.00174
2.4102	0.0285
2.4121	0.0354
2.4141	0.0392
2.416	0.047
2.418	0.0388
2.4199	0.00735
2.4219	-0.0274
2.4238	-0.0406
2.4258	-0.0414
2.4277	-0.0427
2.4297	-0.031
2.4316	-0.00139
2.4336	0.0276
2.4355	0.0328
2.4375	0.0344
2.4395	0.0428
2.4414	0.037
2.4434	0.0104
2.4453	-0.0234
2.4473	-0.0353
2.4492	-0.038
2.4512	-0.0426
2.4531	-0.0355
2.4551	-0.00431
2.457	0.0271
2.459	0.0372
2.4609	0.0417
2.4629	0.0485
2.4648	0.0371
2.4668	0.000632
2.4688	-0.0338
2.4707	-0.0449
2.4727	-0.0437
2.4746	-0.0439
2.4766	-0.0266
2.4785	0.00642
2.4805	0.0362
2.4824	0.0385
2.4844	0.0413
2.4863	0.0454
2.4883	0.0327
2.4902	-0.00434
2.4922	-0.0352
2.4941	-0.0425
2.4961	-0.0421
2.498	-0.0428
2.5	-0.0244
2.502	0.0119
2.5039	0.0366
2.5059	0.0401
2.5078	0.045
2.5098	0.0438
2.5117	0.0207
2.5137	-0.019
2.5156	-0.0433
2.5176	-0.0446
2.5195	-0.0435
2.5215	-0.0357
2.5234	-0.00957
2.5254	0.0265
2.5273	0.0411
2.5293	0.0449
2.5313	0.0478
2.5332	0.0396
2.5352	0.00526
2.5371	-0.0333
2.5391	-0.0477
2.541	-0.0461
2.543	-0.0436
2.5449	-0.0269
2.5469	0.00765
2.5488	0.0353
2.5508	0.0401
2.5527	0.0442
2.5547	0.0438
2.5566	0.0266
2.5586	-0.0123
2.5605	-0.04
2.5625	-0.0438
2.5645	-0.0424
2.5664	-0.0387
2.5684	-0.0154
2.5703	0.0212
2.5723	0.0402
2.5742	0.0458
2.5762	0.0496
2.5781	0.0418
2.5801	0.00591
2.582	-0.0347
2.584	-0.0517
2.5859	-0.0507
2.5879	-0.0468
2.5898	-0.0264
2.5918	0.00953
2.5938	0.0407
2.5957	0.0472
2.5977	0.0505
2.5996	0.0479
2.6016	0.0246
2.6035	-0.0206
2.6055	-0.049
2.6074	-0.0517
2.6094	-0.0467
2.6113	-0.0371
2.6133	-0.00443
2.6152	0.0311
2.6172	0.0463
2.6191	0.0486
2.6211	0.0479
2.623	0.0303
2.625	-0.00793
2.627	-0.0447
2.6289	-0.0519
2.6309	-0.0493
2.6328	-0.0389
2.6348	-0.0148
2.6367	0.0232
2.6387	0.0449
2.6406	0.0505
2.6426	0.0527
2.6445	0.0426
2.6465	0.00602
2.6484	-0.0379
2.6504	-0.0551
2.6523	-0.0529
2.6543	-0.0472
2.6563	-0.0247
2.6582	0.0149
2.6602	0.0431
2.6621	0.0491
2.6641	0.0515
2.666	0.0439
2.668	0.0149
2.6699	-0.0306
2.6719	-0.0527
2.6738	-0.0514
2.6758	-0.0454
2.6777	-0.0298
2.6797	0.00706
2.6816	0.0389
2.6836	0.0515
2.6855	0.0532
2.6875	0.0495
2.6895	0.0203
2.6914	-0.0266
2.6934	-0.0548
2.6953	-0.0579
2.6973	-0.0532
2.6992	-0.0342
2.7012	0.00366
2.7031	0.0398
2.7051	0.0525
2.707	0.0567
2.709	0.0532
2.7109	0.0275
2.7129	-0.0216
2.7148	-0.0552
2.7168	-0.0605
2.7188	-0.0538
2.7207	-0.0383
2.7227	0.00164
2.7246	0.0397
2.7266	0.0563
2.7285	0.0595
2.7305	0.0528
2.7324	0.0219
2.7344	-0.0267
2.7363	-0.0591
2.7383	-0.0617
2.7402	-0.0549
2.7422	-0.0327
2.7441	0.00513
2.7461	0.0447
2.748	0.0571
2.75	0.0612
2.752	0.0539
2.7539	0.0238
2.7559	-0.0287
2.7578	-0.0607
2.7598	-0.0634
2.7617	-0.055
2.7637	-0.0345
2.7656	0.00796
2.7676	0.0453
2.7695	0.058
2.7715	0.0601
2.7734	0.0493
2.7754	0.0175
2.7773	-0.0331
2.7793	-0.0613
2.7813	-0.0619
2.7832	-0.051
2.7852	-0.0287
2.7871	0.014
2.7891	0.0471
2.791	0.0596
2.793	0.0617
2.7949	0.0502
2.7969	0.0103
2.7988	-0.0414
2.8008	-0.0654
2.8027	-0.0665
2.8047	-0.0562
2.8066	-0.0242
2.8086	0.0226
2.8105	0.0543
2.8125	0.0644
2.8145	0.0657
2.8164	0.0484
2.8184	0.0012
2.8203	-0.0503
2.8223	-0.0703
2.8242	-0.0662
2.8262	-0.0522
2.8281	-0.0141
2.8301	0.0349
2.832	0.0612
2.834	0.069
2.8359	0.0631
2.8379	0.0326
2.8398	-0.0223
2.8418	-0.0642
2.8438	-0.0737
2.8457	-0.0655
2.8477	-0.0392
2.8496	0.0072
2.8516	0.0521
2.8535	0.0688
2.8555	0.0717
2.8574	0.0589
2.8594	0.0172
2.8613	-0.0423
2.8633	-0.0737
2.8652	-0.0734
2.8672	-0.059
2.8691	-0.0253
2.8711	0.0275
2.873	0.0594
2.875	0.0699
2.877	0.0667
2.8789	0.0419
2.8809	-0.00927
2.8828	-0.0598
2.8848	-0.0745
2.8867	-0.0681
2.8887	-0.0449
2.8906	-0.00141
2.8926	0.0467
2.8945	0.0678
2.8965	0.0733
2.8984	0.0621
2.9004	0.0211
2.9023	-0.0404
2.9043	-0.0741
2.9063	-0.0791
2.9082	-0.0659
2.9102	-0.0285
2.9121	0.027
2.9141	0.0642
2.916	0.0769
2.918	0.0746
2.9199	0.048
2.9219	-0.0114
2.9238	-0.0661
2.9258	-0.0834
2.9277	-0.0749
2.9297	-0.0486
2.9316	0.00469
2.9336	0.0551
2.9355	0.0777
2.9375	0.0814
2.9395	0.0615
2.9414	0.00777
2.9434	-0.0561
2.9453	-0.0857
2.9473	-0.0847
2.9492	-0.0621
2.9512	-0.013
2.9531	0.0459
2.9551	0.0778
2.957	0.0846
2.959	0.0745
2.9609	0.0313
2.9629	-0.0363
2.9648	-0.0836
2.9668	-0.088
2.9688	-0.0727
2.9707	-0.0308
2.9727	0.0299
2.9746	0.0699
2.9766	0.0844
2.9785	0.0794
2.9805	0.0443
2.9824	-0.0195
2.9844	-0.0758
2.9863	-0.0904
2.9883	-0.0803
2.9902	-0.0441
2.9922	0.016
2.9941	0.0675
2.9961	0.0872
2.998	0.0883
3	0.0597
3.002	-0.00669
3.0039	-0.0725
3.0059	-0.097
3.0078	-0.0917
3.0098	-0.0586
3.0117	0.00496
3.0137	0.0636
3.0156	0.0911
3.0176	0.0945
3.0195	0.0704
3.0215	0.00652
3.0234	-0.0665
3.0254	-0.1
3.0273	-0.0961
3.0293	-0.0654
3.0313	-0.00172
3.0332	0.0622
3.0352	0.0931
3.0371	0.099
3.0391	0.0739
3.041	0.00673
3.043	-0.0688
3.0449	-0.105
3.0469	-0.103
3.0488	-0.0695
3.0508	-0.00285
3.0527	0.0654
3.0547	0.0993
3.0566	0.105
3.0586	0.0795
3.0605	0.011
3.0625	-0.0696
3.0645	-0.11
3.0664	-0.105
3.0684	-0.0724
3.0703	-0.000617
3.0723	0.067
3.0742	0.0999
3.0762	0.106
3.0781	0.0754
3.0801	0.00439
3.082	-0.0757
3.084	-0.111
3.0859	-0.107
3.0879	-0.0682
3.0898	0.00513
3.0918	0.075
3.0938	0.107
3.0957	0.11
3.0977	0.0761
3.0996	-0.00484
3.1016	-0.0861
3.1035	-0.119
3.1055	-0.113
3.1074	-0.0666
3.1094	0.0148
3.1113	0.0836
3.1133	0.116
3.1152	0.115
3.1172	0.0711
3.1191	-0.0163
3.1211	-0.0969
3.123	-0.126
3.125	-0.113
3.127	-0.0562
3.1289	0.0326
3.1309	0.0976
3.1328	0.125
3.1348	0.116
3.1367	0.054
3.1387	-0.0452
3.1406	-0.116
3.1426	-0.136
3.1445	-0.11
3.1465	-0.036
3.1484	0.0581
3.1504	0.117
3.1523	0.137
3.1543	0.113
3.1563	0.0313
3.1582	-0.0719
3.1602	-0.135
3.1621	-0.139
3.1641	-0.098
3.166	-0.0044
3.168	0.0843
3.1699	0.131
3.1719	0.137
3.1738	0.0902
3.1758	-0.00876
3.1777	-0.106
3.1797	-0.145
3.1816	-0.133
3.1836	-0.0674
3.1855	0.0339
3.1875	0.112
3.1895	0.145
3.1914	0.134
3.1934	0.0602
3.1953	-0.0537
3.1973	-0.134
3.1992	-0.154
3.2012	-0.121
3.2031	-0.0292
3.2051	0.072
3.207	0.134
3.209	0.152
3.2109	0.115
3.2129	0.0145
3.2148	-0.096
3.2168	-0.152
3.2188	-0.151
3.2207	-0.0889
3.2227	0.0211
3.2246	0.111
3.2266	0.154
3.2285	0.148
3.2305	0.0727
3.2324	-0.0491
3.2344	-0.138
3.2363	-0.168
3.2383	-0.133
3.2402	-0.0363
3.2422	0.0772
3.2441	0.147
3.2461	0.169
3.248	0.125
3.25	0.0112
3.252	-0.109
3.2539	-0.169
3.2559	-0.165
3.2578	-0.0896
3.2598	0.0344
3.2617	0.126
3.2637	0.172
3.2656	0.154
3.2676	0.0605
3.2695	-0.0717
3.2715	-0.159
3.2734	-0.18
3.2754	-0.127
3.2773	-0.0102
3.2793	0.105
3.2813	0.169
3.2832	0.179
3.2852	0.105
3.2871	-0.03
3.2891	-0.145
3.291	-0.188
3.293	-0.162
3.2949	-0.0519
3.2969	0.075
3.2988	0.161
3.3008	0.189
3.3027	0.139
3.3047	0.012
3.3066	-0.121
3.3086	-0.188
3.3105	-0.181
3.3125	-0.087
3.3145	0.049
3.3164	0.15
3.3184	0.195
3.3203	0.165
3.3223	0.0414
3.3242	-0.102
3.3262	-0.19
3.3281	-0.199
3.3301	-0.116
3.332	0.0259
3.334	0.143
3.3359	0.202
3.3379	0.186
3.3398	0.0724
3.3418	-0.0828
3.3438	-0.189
3.3457	-0.212
3.3477	-0.142
3.3496	0.00866
3.3516	0.135
3.3535	0.207
3.3555	0.199
3.3574	0.0908
3.3594	-0.0724
3.3613	-0.191
3.3633	-0.226
3.3652	-0.157
3.3672	-0.00556
3.3691	0.138
3.3711	0.216
3.373	0.217
3.375	0.108
3.377	-0.0646
3.3789	-0.198
3.3809	-0.241
3.3828	-0.176
3.3848	-0.0134
3.3867	0.137
3.3887	0.228
3.3906	0.231
3.3926	0.121
3.3945	-0.0615
3.3965	-0.205
3.3984	-0.258
3.4004	-0.187
3.4023	-0.0162
3.4043	0.149
3.4063	0.243
3.4082	0.248
3.4102	0.124
3.4121	-0.0708
3.4141	-0.224
3.416	-0.277
3.418	-0.195
3.4199	-0.0101
3.4219	0.166
3.4238	0.266
3.4258	0.263
3.4277	0.126
3.4297	-0.0829
3.4316	-0.246
3.4336	-0.297
3.4355	-0.201
3.4375	0.0071
3.4395	0.189
3.4414	0.291
3.4434	0.273
3.4453	0.112
3.4473	-0.111
3.4492	-0.276
3.4512	-0.318
3.4531	-0.194
3.4551	0.0339
3.457	0.227
3.459	0.323
3.4609	0.282
3.4629	0.0912
3.4648	-0.148
3.4668	-0.315
3.4688	-0.34
3.4707	-0.178
3.4727	0.0712
3.4746	0.269
3.4766	0.354
3.4785	0.279
3.4805	0.058
3.4824	-0.195
3.4844	-0.357
3.4863	-0.352
3.4883	-0.146
3.4902	0.126
3.4922	0.324
3.4941	0.385
3.4961	0.264
3.498	0.00305
3.5	-0.258
3.502	-0.408
3.5039	-0.35
3.5059	-0.0947
3.5078	0.196
3.5098	0.387
3.5117	0.406
3.5137	0.229
3.5156	-0.0678
3.5176	-0.331
3.5195	-0.451
3.5215	-0.328
3.5234	-0.0192
3.5254	0.28
3.5273	0.449
3.5293	0.406
3.5313	0.163
3.5332	-0.159
3.5352	-0.416
3.5371	-0.479
3.5391	-0.273
3.541	0.0803
3.543	0.384
3.5449	0.504
3.5469	0.381
3.5488	0.0732
3.5508	-0.266
3.5527	-0.499
3.5547	-0.48
3.5566	-0.185
3.5586	0.2
3.5605	0.488
3.5625	0.531
3.5645	0.317
3.5664	-0.0441
3.5684	-0.388
3.5703	-0.567
3.5723	-0.438
3.5742	-0.0643
3.5762	0.343
3.5781	0.579
3.5801	0.52
3.582	0.211
3.584	-0.184
3.5859	-0.512
3.5879	-0.594
3.5898	-0.346
3.5918	0.0929
3.5938	0.494
3.5957	0.634
3.5977	0.454
3.5996	0.0692
3.6016	-0.339
3.6035	-0.613
3.6055	-0.564
3.6074	-0.207
3.6094	0.273
3.6113	0.62
3.6133	0.628
3.6152	0.333
3.6172	-0.105
3.6191	-0.499
3.6211	-0.664
3.623	-0.471
3.625	-0.022
3.627	0.466
3.6289	0.698
3.6309	0.559
3.6328	0.165
3.6348	-0.295
3.6367	-0.631
3.6387	-0.641
3.6406	-0.319
3.6426	0.2
3.6445	0.628
3.6465	0.698
3.6484	0.421
3.6504	-0.0425
3.6523	-0.484
3.6543	-0.692
3.6563	-0.547
3.6582	-0.111
3.6602	0.424
3.6621	0.72
3.6641	0.62
3.666	0.228
3.668	-0.269
3.6699	-0.624
3.6719	-0.671
3.6738	-0.379
3.6758	0.14
3.6777	0.606
3.6797	0.717
3.6816	0.463
3.6836	-0.0117
3.6855	-0.47
3.6875	-0.678
3.6895	-0.562
3.6914	-0.146
3.6934	0.384
3.6953	0.69
3.6973	0.62
3.6992	0.236
3.7012	-0.26
3.7031	-0.595
3.7051	-0.641
3.707	-0.371
3.709	0.122
3.7109	0.562
3.7129	0.678
3.7148	0.444
3.7168	-0.0314
3.7188	-0.452
3.7207	-0.63
3.7227	-0.516
3.7246	-0.119
3.7266	0.356
3.7285	0.634
3.7305	0.565
3.7324	0.19
3.7344	-0.271
3.7363	-0.546
3.7383	-0.568
3.7402	-0.299
3.7422	0.139
3.7441	0.5
3.7461	0.592
3.748	0.35
3.75	-0.0805
3.752	-0.42
3.7539	-0.544
3.7559	-0.4
3.7578	-0.0395
3.7598	0.338
3.7617	0.537
3.7637	0.436
3.7656	0.0816
3.7676	-0.275
3.7695	-0.467
3.7715	-0.431
3.7734	-0.164
3.7754	0.174
3.7773	0.427
3.7793	0.441
3.7813	0.191
3.7832	-0.139
3.7852	-0.359
3.7871	-0.396
3.7891	-0.221
3.791	0.0563
3.793	0.297
3.7949	0.386
3.7969	0.227
3.7988	-0.0377
3.8008	-0.255
3.8027	-0.325
3.8047	-0.221
3.8066	-0.0112
3.8086	0.194
3.8105	0.3
3.8125	0.212
3.8145	0.00862
3.8164	-0.169
3.8184	-0.243
3.8203	-0.174
3.8223	-0.0269
3.8242	0.121
3.8262	0.214
3.8281	0.155
3.8301	0.00859
3.832	-0.126
3.834	-0.17
3.8359	-0.109
3.8379	0.001
3.8398	0.0966
3.8418	0.153
3.8438	0.0965
3.8457	-0.0259
3.8477	-0.114
3.8496	-0.13
3.8516	-0.0469
3.8535	0.0421
3.8555	0.101
3.8574	0.116
3.8594	0.0433
3.8613	-0.0699
3.8633	-0.134
3.8652	-0.112
3.8672	-0.00244
3.8691	0.0968
3.8711	0.128
3.873	0.108
3.875	0.00595
3.877	-0.11
3.8789	-0.164
3.8809	-0.123
3.8828	0.0149
3.8848	0.128
3.8867	0.162
3.8887	0.116
3.8906	-0.0062
3.8926	-0.134
3.8945	-0.183
3.8965	-0.137
3.8984	0.0143
3.9004	0.138
3.9023	0.179
[truncated: 2,098 more rows]
