# Supplementary material for: Effect of the Supports’ Positions on the Vibration Characteristics of a Flexible Rotor Shafting
Source: Hindawi journal article supplement (doi:10.1155/2020/1592794), 2020-02-12
Supplement: f1 [file 1592794.f1.zip › 1592794.f1/test_data/Table11_10.xlsx]

## Sheet: Sheet1
Time t/s	vibration deformation amount u/mm
0	-0.000404
0.002	-0.00122
0.0039	-0.00152
0.0059	-0.00244
0.0078	-0.00267
0.0098	-0.00295
0.0117	-0.00255
0.0137	-0.00262
0.0156	-0.00285
0.0176	-0.00241
0.0195	-0.00312
0.0215	-0.00322
0.0234	-0.00326
0.0254	-0.00374
0.0273	-0.00385
0.0293	-0.00363
0.0313	-0.0037
0.0332	-0.00393
0.0352	-0.00459
0.0371	-0.00483
0.0391	-0.00534
0.041	-0.0049
0.043	-0.00509
0.0449	-0.0053
0.0469	-0.00526
0.0488	-0.00532
0.0508	-0.00511
0.0527	-0.00532
0.0547	-0.00612
0.0566	-0.00563
0.0586	-0.00582
0.0605	-0.0056
0.0625	-0.00507
0.0645	-0.00496
0.0664	-0.00531
0.0684	-0.00539
0.0703	-0.00549
0.0723	-0.00559
0.0742	-0.0049
0.0762	-0.00503
0.0781	-0.00503
0.0801	-0.00489
0.082	-0.00457
0.084	-0.00454
0.0859	-0.00459
0.0879	-0.00387
0.0898	-0.00314
0.0918	-0.00205
0.0938	-0.000798
0.0957	-0.00131
0.0977	-0.00334
0.0996	-0.00505
0.1016	-0.00508
0.1035	-0.00274
0.1055	0.000513
0.1074	0.00243
0.1094	0.00311
0.1113	0.00271
0.1133	0.00222
0.1152	0.00195
0.1172	0.00197
0.1191	0.00323
0.1211	0.0053
0.123	0.00717
0.125	0.00736
0.127	0.006
0.1289	0.00463
0.1309	0.00355
0.1328	0.00302
0.1348	0.00305
0.1367	0.00358
0.1387	0.00386
0.1406	0.00377
0.1426	0.00306
0.1445	0.000406
0.1465	-0.0036
0.1484	-0.00775
0.1504	-0.011
0.1523	-0.013
0.1543	-0.015
0.1563	-0.0177
0.1582	-0.0202
0.1602	-0.0224
0.1621	-0.0253
0.1641	-0.0279
0.166	-0.0302
0.168	-0.029
0.1699	-0.0253
0.1719	-0.0224
0.1738	-0.0228
0.1758	-0.0246
0.1777	-0.0256
0.1797	-0.023
0.1816	-0.0189
0.1836	-0.0159
0.1855	-0.0137
0.1875	-0.0121
0.1895	-0.00961
0.1914	-0.00581
0.1934	-0.00533
0.1953	-0.00716
0.1973	-0.0109
0.1992	-0.0124
0.2012	-0.0119
0.2031	-0.0123
0.2051	-0.0168
0.207	-0.0235
0.209	-0.0273
0.2109	-0.0272
0.2129	-0.0247
0.2148	-0.0234
0.2168	-0.0218
0.2188	-0.0193
0.2207	-0.0156
0.2227	-0.0131
0.2246	-0.0137
0.2266	-0.014
0.2285	-0.0103
0.2305	-0.00273
0.2324	0.00499
0.2344	0.00895
0.2363	0.00864
0.2383	0.00588
0.2402	0.00301
0.2422	-0.00128
0.2441	-0.00652
0.2461	-0.0108
0.248	-0.0118
0.25	-0.00721
0.252	-0.00151
0.2539	0.00104
0.2559	-0.000371
0.2578	-0.00262
0.2598	-0.00383
0.2617	-0.00177
0.2637	0.00181
0.2656	0.00636
0.2676	0.0104
0.2695	0.0132
0.2715	0.0131
0.2734	0.00874
0.2754	0.00137
0.2773	-0.00578
0.2793	-0.01
0.2813	-0.0124
0.2832	-0.0146
0.2852	-0.0165
0.2871	-0.018
0.2891	-0.0184
0.291	-0.0189
0.293	-0.0208
0.2949	-0.0215
0.2969	-0.0207
0.2988	-0.0188
0.3008	-0.0177
0.3027	-0.0163
0.3047	-0.0138
0.3066	-0.0113
0.3086	-0.00952
0.3105	-0.00992
0.3125	-0.0117
0.3145	-0.0142
0.3164	-0.0157
0.3184	-0.0163
0.3203	-0.0179
0.3223	-0.0185
0.3242	-0.0166
0.3262	-0.0104
0.3281	-0.00267
0.3301	0.00468
0.332	0.00954
0.334	0.0105
0.3359	0.00883
0.3379	0.00315
0.3398	-0.00339
0.3418	-0.0101
0.3438	-0.0125
0.3457	-0.0113
0.3477	-0.00705
0.3496	-0.00247
0.3516	0.00233
0.3535	0.00677
0.3555	0.00961
0.3574	0.0095
0.3594	0.00607
0.3613	0.00251
0.3633	-0.00117
0.3652	-0.00824
0.3672	-0.0182
0.3691	-0.0281
0.3711	-0.0321
0.373	-0.0303
0.375	-0.024
0.377	-0.0155
0.3789	-0.00918
0.3809	-0.00406
0.3828	-0.00128
0.3848	-0.00286
0.3867	-0.0114
0.3887	-0.0242
0.3906	-0.0339
0.3926	-0.0342
0.3945	-0.0236
0.3965	-0.00997
0.3984	2.08e-05
0.4004	0.00694
0.4023	0.0104
0.4043	0.00863
0.4063	0.000377
0.4082	-0.00867
0.4102	-0.0132
0.4121	-0.00995
0.4141	-0.000872
0.416	0.00852
0.418	0.0109
0.4199	0.00848
0.4219	0.00508
0.4238	0.00148
0.4258	-0.00216
0.4277	-0.00442
0.4297	-0.00432
0.4316	0.000673
0.4336	0.00435
0.4355	-0.000863
0.4375	-0.0124
0.4395	-0.0241
0.4414	-0.0305
0.4434	-0.033
0.4453	-0.031
0.4473	-0.0256
0.4492	-0.0152
0.4512	-0.00202
0.4531	0.00512
0.4551	0.00215
0.457	-0.00829
0.459	-0.0211
0.4609	-0.0295
0.4629	-0.032
0.4648	-0.0287
0.4668	-0.0157
0.4688	0.00309
0.4707	0.0194
0.4727	0.0256
0.4746	0.0195
0.4766	0.00437
0.4785	-0.0112
0.4805	-0.0205
0.4824	-0.0218
0.4844	-0.0155
0.4863	-0.00238
0.4883	0.015
0.4902	0.0277
0.4922	0.0285
0.4941	0.0149
0.4961	-0.00477
0.498	-0.0254
0.5	-0.0388
0.502	-0.04
0.5039	-0.0308
0.5059	-0.0155
0.5078	0.000361
0.5098	0.00932
0.5117	0.00435
0.5137	-0.011
0.5156	-0.0282
0.5176	-0.0374
0.5195	-0.0346
0.5215	-0.0207
0.5234	-0.00215
0.5254	0.0131
0.5273	0.0212
0.5293	0.0164
0.5313	-0.000255
0.5332	-0.016
0.5352	-0.0205
0.5371	-0.0115
0.5391	0.00508
0.541	0.0197
0.543	0.0232
0.5449	0.0137
0.5469	-0.000868
0.5488	-0.0129
0.5508	-0.0179
0.5527	-0.014
0.5547	-0.00305
0.5566	0.00572
0.5586	0.0042
0.5605	-0.00699
0.5625	-0.0282
0.5645	-0.0465
0.5664	-0.0489
0.5684	-0.0323
0.5703	-0.00607
0.5723	0.0159
0.5742	0.0225
0.5762	0.0104
0.5781	-0.0156
0.5801	-0.0414
0.582	-0.0546
0.584	-0.0428
0.5859	-0.00884
0.5879	0.0284
0.5898	0.0519
0.5918	0.0478
0.5938	0.0184
0.5957	-0.019
0.5977	-0.0442
0.5996	-0.0469
0.6016	-0.0245
0.6035	0.0132
0.6055	0.0454
0.6074	0.0557
0.6094	0.0375
0.6113	-0.00421
0.6133	-0.0513
0.6152	-0.0757
0.6172	-0.0661
0.6191	-0.0287
0.6211	0.0128
0.623	0.0347
0.625	0.0291
0.627	0.000943
0.6289	-0.0313
0.6309	-0.0531
0.6328	-0.0515
0.6348	-0.0272
0.6367	0.00638
0.6387	0.0342
0.6406	0.0398
0.6426	0.0216
0.6445	-0.00581
0.6465	-0.0267
0.6484	-0.028
0.6504	-0.0128
0.6523	0.00818
0.6543	0.0197
0.6563	0.0211
0.6582	0.0137
0.6602	0.000626
0.6621	-0.0132
0.6641	-0.0226
0.666	-0.0264
0.668	-0.0198
0.6699	-0.0128
0.6719	-0.0116
0.6738	-0.0151
0.6758	-0.0183
0.6777	-0.015
0.6797	-0.0104
0.6816	-0.00844
0.6836	-0.0127
0.6855	-0.0172
0.6875	-0.0166
0.6895	-0.0107
0.6914	0.00132
0.6934	0.00813
0.6953	0.0124
0.6973	0.0117
0.6992	0.00645
0.7012	0.000698
0.7031	-0.00483
0.7051	-0.00608
0.707	-0.00126
0.709	0.00661
0.7109	0.0115
0.7129	0.00838
0.7148	-0.000593
0.7168	-0.0171
0.7188	-0.0273
0.7207	-0.0302
0.7227	-0.0281
0.7246	-0.0214
0.7266	-0.0158
0.7285	-0.00907
0.7305	-0.00579
0.7324	-0.00412
0.7344	-0.00671
0.7363	-0.01
0.7383	-0.015
0.7402	-0.0179
0.7422	-0.0132
0.7441	-0.00367
0.7461	0.00912
0.748	0.0187
0.75	0.0199
0.752	0.0134
0.7539	-0.000102
0.7559	-0.0125
0.7578	-0.0179
0.7598	-0.0123
0.7617	0.00116
0.7637	0.0145
0.7656	0.0164
0.7676	0.000975
0.7695	-0.0214
0.7715	-0.0421
0.7734	-0.0469
0.7754	-0.0328
0.7773	-0.01
0.7793	0.00799
0.7813	0.0117
0.7832	0.00194
0.7852	-0.0111
0.7871	-0.0215
0.7891	-0.023
0.791	-0.0111
0.793	0.00523
0.7949	0.0194
0.7969	0.0238
0.7988	0.017
0.8008	0.0058
0.8027	-0.00408
0.8047	-0.00988
0.8066	-0.00918
0.8086	-0.00441
0.8105	0.00222
0.8125	0.00816
0.8145	0.00579
0.8164	-0.0074
0.8184	-0.0246
0.8203	-0.0411
0.8223	-0.0434
0.8242	-0.0314
0.8262	-0.00935
0.8281	0.0091
0.8301	0.0169
0.832	0.00929
0.834	-0.00761
0.8359	-0.0286
0.8379	-0.0395
0.8398	-0.0298
0.8418	-0.00237
0.8438	0.0312
0.8457	0.0478
0.8477	0.0382
0.8496	0.00899
0.8516	-0.0222
0.8535	-0.0367
0.8555	-0.029
0.8574	-0.0077
0.8594	0.0175
0.8613	0.0312
0.8633	0.022
0.8652	-0.00374
0.8672	-0.0384
0.8691	-0.0604
0.8711	-0.0562
0.873	-0.029
0.875	0.00225
0.877	0.0214
0.8789	0.0236
0.8809	0.0145
0.8828	-0.00334
0.8848	-0.0218
0.8867	-0.0331
0.8887	-0.0291
0.8906	-0.0049
0.8926	0.0251
0.8945	0.0452
0.8965	0.041
0.8984	0.0142
0.9004	-0.0169
0.9023	-0.0357
0.9043	-0.0363
0.9063	-0.0197
0.9082	0.0026
0.9102	0.0189
0.9121	0.02
0.9141	-0.00323
0.916	-0.0358
0.918	-0.0567
0.9199	-0.0496
0.9219	-0.0206
0.9238	0.00926
0.9258	0.0224
0.9277	0.0181
0.9297	0.00169
0.9316	-0.0121
0.9336	-0.0206
0.9355	-0.0187
0.9375	-0.00487
0.9395	0.0144
0.9414	0.0312
0.9434	0.0308
0.9453	0.016
0.9473	-0.00419
0.9492	-0.0175
0.9512	-0.0205
0.9531	-0.0157
0.9551	-0.0113
0.957	-0.00476
0.959	-0.00176
0.9609	-0.00675
0.9629	-0.0195
0.9648	-0.0323
0.9668	-0.035
0.9688	-0.0228
0.9707	-0.00233
0.9727	0.0159
0.9746	0.018
0.9766	0.00692
0.9785	-0.0081
0.9805	-0.0175
0.9824	-0.0137
0.9844	-0.00255
0.9863	0.0132
0.9883	0.023
0.9902	0.0218
0.9922	0.0103
0.9941	-0.00595
0.9961	-0.0181
0.998	-0.0206
1	-0.0172
1.002	-0.0111
1.0039	-0.00959
1.0059	-0.0134
1.0078	-0.0161
1.0098	-0.0142
1.0117	-0.0125
1.0137	-0.0147
1.0156	-0.0167
1.0176	-0.0119
1.0195	-0.00162
1.0215	0.0119
1.0234	0.0172
1.0254	0.0131
1.0273	0.00503
1.0293	-0.000193
1.0313	0.00164
1.0332	0.00438
1.0352	0.00485
1.0371	0.00512
1.0391	0.00165
1.041	-0.000836
1.043	-0.00691
1.0449	-0.0156
1.0469	-0.0228
1.0488	-0.0279
1.0508	-0.0279
1.0527	-0.0224
1.0547	-0.0117
1.0566	-0.00172
1.0586	0.00522
1.0605	0.00557
1.0625	-0.00257
1.0645	-0.0141
1.0664	-0.0192
1.0684	-0.0126
1.0703	0.00658
1.0723	0.0241
1.0742	0.0302
1.0762	0.0202
1.0781	0.00133
1.0801	-0.0115
1.082	-0.0172
1.084	-0.014
1.0859	-0.00977
1.0879	-0.0064
1.0898	-0.00365
1.0918	-0.00727
1.0938	-0.0157
1.0957	-0.0236
1.0977	-0.0263
1.0996	-0.0234
1.1016	-0.0126
1.1035	0.0026
1.1055	0.0146
1.1074	0.0198
1.1094	0.0129
1.1113	-0.000401
1.1133	-0.0106
1.1152	-0.0107
1.1172	0.00183
1.1191	0.0145
1.1211	0.02
1.123	0.0126
1.125	-0.00194
1.127	-0.0148
1.1289	-0.023
1.1309	-0.0231
1.1328	-0.0211
1.1348	-0.0205
1.1367	-0.017
1.1387	-0.00936
1.1406	-0.00219
1.1426	-0.00121
1.1445	-0.00661
1.1465	-0.0131
1.1484	-0.0136
1.1504	-0.0049
1.1523	0.00615
1.1543	0.017
1.1563	0.0205
1.1582	0.0177
1.1602	0.00759
1.1621	-0.00172
1.1641	-0.00704
1.166	-0.00721
1.168	-0.00415
1.1699	-0.00571
1.1719	-0.00992
1.1738	-0.0138
1.1758	-0.0195
1.1777	-0.023
1.1797	-0.0247
1.1816	-0.0204
1.1836	-0.0127
1.1855	0.00112
1.1875	0.0132
1.1895	0.0149
1.1914	0.00523
1.1934	-0.00768
1.1953	-0.0115
1.1973	-0.00407
1.1992	0.011
1.2012	0.0199
1.2031	0.0181
1.2051	0.00762
1.207	-0.00512
1.209	-0.0158
1.2109	-0.0226
1.2129	-0.0228
1.2148	-0.0205
1.2168	-0.0178
1.2188	-0.0125
1.2207	-0.00615
1.2227	-0.00327
1.2246	-0.00749
1.2266	-0.0114
1.2285	-0.0116
1.2305	-0.0021
1.2324	0.00986
1.2344	0.0176
1.2363	0.017
1.2383	0.0121
1.2402	0.0086
1.2422	0.0055
1.2441	0.00234
1.2461	-0.00631
1.248	-0.0136
1.25	-0.0161
1.252	-0.0131
1.2539	-0.00867
1.2559	-0.0135
1.2578	-0.022
1.2598	-0.0259
1.2617	-0.0193
1.2637	-0.00824
1.2656	0.00335
1.2676	0.00788
1.2695	0.00637
1.2715	0.000434
1.2734	-0.0019
1.2754	0.000574
1.2773	0.00719
1.2793	0.0129
1.2813	0.0126
1.2832	0.00834
1.2852	-0.000399
1.2871	-0.0082
1.2891	-0.0172
1.291	-0.0207
1.293	-0.021
1.2949	-0.0185
1.2969	-0.0143
1.2988	-0.00805
1.3008	-0.00682
1.3027	-0.00834
1.3047	-0.00663
1.3066	0.000472
1.3086	0.0112
1.3105	0.0145
1.3125	0.01
1.3145	0.00246
1.3164	0.00344
1.3184	0.00802
1.3203	0.0112
1.3223	0.00401
1.3242	-0.0101
1.3262	-0.0207
1.3281	-0.0211
1.3301	-0.0141
1.332	-0.0141
1.334	-0.0204
1.3359	-0.0214
1.3379	-0.0119
1.3398	-5.12e-05
1.3418	0.00492
1.3438	-0.000708
1.3457	-0.00502
1.3477	-0.00354
1.3496	0.00752
1.3516	0.0161
1.3535	0.0171
1.3555	0.0103
1.3574	0.0047
1.3594	0.00183
1.3613	-0.002
1.3633	-0.0128
1.3652	-0.0236
1.3672	-0.0235
1.3691	-0.017
1.3711	-0.0103
1.373	-0.0103
1.375	-0.0152
1.377	-0.0149
1.3789	-0.00255
1.3809	0.0109
1.3828	0.0141
1.3848	0.00696
1.3867	-0.000223
1.3887	0.00142
1.3906	0.0116
1.3926	0.0145
1.3945	0.00856
1.3965	-0.00423
1.3984	-0.0141
1.4004	-0.0188
1.4023	-0.0157
1.4043	-0.0162
1.4063	-0.0208
1.4082	-0.0218
1.4102	-0.0122
1.4121	-0.00242
1.4141	0.00218
1.416	-0.00103
1.418	-0.000865
1.4199	0.00527
1.4219	0.0145
1.4238	0.0166
1.4258	0.0104
1.4277	0.00537
1.4297	0.00647
1.4316	0.00763
1.4336	-0.0017
1.4355	-0.0198
1.4375	-0.031
1.4395	-0.026
1.4414	-0.0152
1.4434	-0.0102
1.4453	-0.0132
1.4473	-0.0149
1.4492	-0.00577
1.4512	0.00891
1.4531	0.0145
1.4551	0.00481
1.457	-0.00586
1.459	-0.00139
1.4609	0.0163
1.4629	0.0239
1.4648	0.013
1.4668	-0.00618
1.4688	-0.0179
1.4707	-0.0193
1.4727	-0.0157
1.4746	-0.0176
1.4766	-0.0249
1.4785	-0.0183
1.4805	-0.00292
1.4824	0.00599
1.4844	0.00351
1.4863	-0.00401
1.4883	0.000156
1.4902	0.0119
1.4922	0.0179
1.4941	0.0105
1.4961	0.000533
1.498	0.00185
1.5	0.0104
1.502	0.00674
1.5039	-0.0143
1.5059	-0.0353
1.5078	-0.0324
1.5098	-0.0178
1.5117	-0.00918
1.5137	-0.0122
1.5156	-0.0162
1.5176	-0.00539
1.5195	0.0124
1.5215	0.0172
1.5234	0.00419
1.5254	-0.00808
1.5273	0.00055
1.5293	0.0209
1.5313	0.0264
1.5332	0.00979
1.5352	-0.0129
1.5371	-0.0226
1.5391	-0.0192
1.541	-0.0135
1.543	-0.0216
1.5449	-0.0275
1.5469	-0.0179
1.5488	0.000344
1.5508	0.0121
1.5527	0.00922
1.5547	0.00148
1.5566	0.00174
1.5586	0.00958
1.5605	0.0127
1.5625	0.00596
1.5645	0.00139
1.5664	0.00433
1.5684	0.00454
1.5703	-0.00904
1.5723	-0.0263
1.5742	-0.0323
1.5762	-0.0258
1.5781	-0.0144
1.5801	-0.00977
1.582	-0.00751
1.584	-0.00142
1.5859	0.0103
1.5879	0.0167
1.5898	0.0138
1.5918	0.0075
1.5938	0.00682
1.5957	0.0102
1.5977	0.011
1.5996	0.00348
1.6016	-0.0122
1.6035	-0.0246
1.6055	-0.0247
1.6074	-0.0194
1.6094	-0.0174
1.6113	-0.0167
1.6133	-0.0138
1.6152	-0.00177
1.6172	0.0132
1.6191	0.0165
1.6211	0.00824
1.623	-0.000291
1.625	0.00296
1.627	0.0128
1.6289	0.0153
1.6309	0.00483
1.6328	-0.0121
1.6348	-0.0238
1.6367	-0.0216
1.6387	-0.0162
1.6406	-0.0195
1.6426	-0.0211
1.6445	-0.0134
1.6465	0.00295
1.6484	0.0164
1.6504	0.0174
1.6523	0.0115
1.6543	0.00783
1.6563	0.0116
1.6582	0.0118
1.6602	0.00641
1.6621	-0.00452
1.6641	-0.0149
1.666	-0.021
1.668	-0.0208
1.6699	-0.02
1.6719	-0.0226
1.6738	-0.0191
1.6758	-0.00994
1.6777	0.00509
1.6797	0.014
1.6816	0.0116
1.6836	0.00251
1.6855	0.00434
1.6875	0.0144
1.6895	0.0199
1.6914	0.00993
1.6934	-0.00674
1.6953	-0.0201
1.6973	-0.0235
1.6992	-0.0191
1.7012	-0.0219
1.7031	-0.0232
1.7051	-0.0164
1.707	-0.000561
1.709	0.0154
1.7109	0.0205
1.7129	0.0143
1.7148	0.00686
1.7168	0.0057
1.7188	0.00811
1.7207	0.00739
1.7227	0.000134
1.7246	-0.0125
1.7266	-0.0233
1.7285	-0.0209
1.7305	-0.0176
1.7324	-0.0196
1.7344	-0.0217
1.7363	-0.0137
1.7383	0.00473
1.7402	0.019
1.7422	0.0177
1.7441	0.00981
1.7461	0.0112
1.748	0.0197
1.75	0.0172
1.752	0.000336
1.7539	-0.0201
1.7559	-0.0304
1.7578	-0.0227
1.7598	-0.0156
1.7617	-0.0173
1.7637	-0.019
1.7656	-0.0106
1.7676	0.00778
1.7695	0.0207
1.7715	0.0164
1.7734	0.00384
1.7754	0.00129
1.7773	0.0114
1.7793	0.0171
1.7813	0.00733
1.7832	-0.0154
1.7852	-0.0317
1.7871	-0.0264
1.7891	-0.0149
1.791	-0.0147
1.793	-0.0199
1.7949	-0.0144
1.7969	0.00909
1.7988	0.028
1.8008	0.0266
1.8027	0.0104
1.8047	0.00568
1.8066	0.0107
1.8086	0.0134
1.8105	-0.00165
1.8125	-0.0272
1.8145	-0.038
1.8164	-0.0249
1.8184	-0.0117
1.8203	-0.0112
1.8223	-0.0166
1.8242	-0.0083
1.8262	0.014
1.8281	0.0254
1.8301	0.0143
1.832	-0.000565
1.834	0.00276
1.8359	0.0176
1.8379	0.018
1.8398	-0.00473
1.8418	-0.0344
1.8438	-0.0371
1.8457	-0.0214
1.8477	-0.0107
1.8496	-0.0147
1.8516	-0.0151
1.8535	0.00393
1.8555	0.0292
1.8574	0.0353
1.8594	0.0181
1.8613	0.000852
1.8633	-0.00222
1.8652	0.00439
1.8672	-0.000306
1.8691	-0.0215
1.8711	-0.0362
1.873	-0.0282
1.875	-0.0126
1.877	-0.00606
1.8789	-0.0093
1.8809	-0.00598
1.8828	0.00865
1.8848	0.0209
1.8867	0.0216
1.8887	0.0162
1.8906	0.0142
1.8926	0.0103
1.8945	-7.23e-05
1.8965	-0.0211
1.8984	-0.0359
1.9004	-0.0346
1.9023	-0.0241
1.9043	-0.0122
1.9063	-0.00335
1.9082	0.00877
1.9102	0.0218
1.9121	0.0236
1.9141	0.0143
1.916	0.00588
1.918	0.00286
1.9199	0.0025
1.9219	-0.00384
1.9238	-0.0203
1.9258	-0.0289
1.9277	-0.0239
1.9297	-0.0178
1.9316	-0.0148
1.9336	-0.0113
1.9355	0.00366
1.9375	0.0201
1.9395	0.0268
1.9414	0.0224
1.9434	0.0181
1.9453	0.0123
1.9473	0.00269
1.9492	-0.0158
1.9512	-0.0347
1.9531	-0.0366
1.9551	-0.0259
1.957	-0.016
1.959	-0.00825
1.9609	0.000924
1.9629	0.016
1.9648	0.0233
1.9668	0.0151
1.9688	0.00562
1.9707	0.00653
1.9727	0.0106
1.9746	0.00552
1.9766	-0.0146
1.9785	-0.033
1.9805	-0.03
1.9824	-0.0212
1.9844	-0.0156
1.9863	-0.0129
1.9883	0.00204
1.9902	0.0224
1.9922	0.0328
1.9941	0.0263
1.9961	0.0149
1.998	0.00458
2	-0.00325
2.002	-0.0167
2.0039	-0.0322
2.0059	-0.0334
2.0078	-0.0242
2.0098	-0.0161
2.0117	-0.00789
2.0137	0.00357
2.0156	0.0166
2.0176	0.0199
2.0195	0.0142
2.0215	0.0128
2.0234	0.0186
2.0254	0.0154
2.0273	-0.00423
2.0293	-0.0305
2.0313	-0.0385
2.0332	-0.028
2.0352	-0.0198
2.0371	-0.0167
2.0391	-0.00548
2.041	0.0188
2.043	0.0357
2.0449	0.0307
2.0469	0.012
2.0488	0.00156
2.0508	-0.00111
2.0527	-0.00786
2.0547	-0.0246
2.0566	-0.0343
2.0586	-0.0277
2.0605	-0.0168
2.0625	-0.01
2.0645	-0.00273
2.0664	0.0106
2.0684	0.0202
2.0703	0.0227
2.0723	0.0224
2.0742	0.022
2.0762	0.0126
2.0781	-0.00915
2.0801	-0.035
2.082	-0.0419
2.084	-0.0315
2.0859	-0.0215
2.0879	-0.014
2.0898	0.00076
2.0918	0.0262
2.0938	0.036
2.0957	0.0224
2.0977	0.0046
2.0996	0.000378
2.1016	0.00327
2.1035	-0.00526
2.1055	-0.0265
2.1074	-0.0334
2.1094	-0.0245
2.1113	-0.0142
2.1133	-0.0118
2.1152	-0.00428
2.1172	0.0144
2.1191	0.0283
2.1211	0.0313
2.123	0.0266
2.125	0.0163
2.127	-0.001
2.1289	-0.0262
2.1309	-0.0445
2.1328	-0.0395
2.1348	-0.0261
2.1367	-0.0152
2.1387	-0.00238
2.1406	0.0192
2.1426	0.0337
2.1445	0.0268
2.1465	0.00999
2.1484	0.00465
2.1504	0.00685
2.1523	0.000903
2.1543	-0.0211
2.1563	-0.0351
2.1582	-0.0293
2.1602	-0.0182
2.1621	-0.013
2.1641	-0.00561
2.166	0.0133
2.168	0.0297
2.1699	0.0325
2.1719	0.0276
2.1738	0.0148
2.1758	-0.00373
2.1777	-0.0279
2.1797	-0.0442
2.1816	-0.0378
2.1836	-0.025
2.1855	-0.0135
2.1875	0.000147
2.1895	0.0219
2.1914	0.035
2.1934	0.0269
2.1953	0.013
2.1973	0.00772
2.1992	0.00573
2.2012	-0.00903
2.2031	-0.0325
2.2051	-0.0373
2.207	-0.0273
2.209	-0.0165
2.2109	-0.00972
2.2129	0.00501
2.2148	0.0249
2.2168	0.0302
2.2188	0.0243
2.2207	0.018
2.2227	0.00866
2.2246	-0.00936
2.2266	-0.0345
2.2285	-0.042
2.2305	-0.0302
2.2324	-0.0175
2.2344	-0.00851
2.2363	0.00692
2.2383	0.0291
2.2402	0.0357
2.2422	0.0267
2.2441	0.0163
2.2461	0.00616
2.248	-0.00923
2.25	-0.0331
2.252	-0.0428
2.2539	-0.033
2.2559	-0.0196
2.2578	-0.00927
2.2598	0.00675
2.2617	0.0271
2.2637	0.0304
2.2656	0.0215
2.2676	0.0153
2.2695	0.0105
2.2715	-0.00323
2.2734	-0.0293
2.2754	-0.0413
2.2773	-0.0332
2.2793	-0.0198
2.2813	-0.00991
2.2832	0.00723
2.2852	0.0296
2.2871	0.0365
2.2891	0.0291
2.291	0.0189
2.293	0.0056
2.2949	-0.0178
2.2969	-0.0434
2.2988	-0.0459
2.3008	-0.0288
2.3027	-0.0144
2.3047	-0.00283
2.3066	0.0158
2.3086	0.0335
2.3105	0.0325
2.3125	0.0204
2.3145	0.0113
2.3164	0.00326
2.3184	-0.0154
2.3203	-0.0384
2.3223	-0.0405
2.3242	-0.0284
2.3262	-0.0161
2.3281	-0.00371
2.3301	0.0198
2.332	0.0363
2.334	0.0318
2.3359	0.0209
2.3379	0.0115
2.3398	-0.00316
2.3418	-0.0294
2.3438	-0.0473
2.3457	-0.0389
2.3477	-0.0211
2.3496	-0.00727
2.3516	0.00826
2.3535	0.0297
2.3555	0.0374
2.3574	0.0291
2.3594	0.0192
2.3613	0.00731
2.3633	-0.0133
2.3652	-0.041
2.3672	-0.0479
2.3691	-0.0329
2.3711	-0.0181
2.373	-0.00497
2.375	0.0169
2.377	0.0367
2.3789	0.0345
2.3809	0.0228
2.3828	0.0123
2.3848	-0.000516
2.3867	-0.0242
2.3887	-0.0451
2.3906	-0.0406
2.3926	-0.0245
2.3945	-0.011
2.3965	0.0059
2.3984	0.0313
2.4004	0.0413
2.4023	0.0331
2.4043	0.0205
2.4063	0.00668
2.4082	-0.0176
2.4102	-0.0468
2.4121	-0.0521
2.4141	-0.0342
2.416	-0.0162
2.418	0.00172
2.4199	0.0251
2.4219	0.0415
2.4238	0.0355
2.4258	0.0229
2.4277	0.0111
2.4297	-0.00525
2.4316	-0.0343
2.4336	-0.051
2.4355	-0.0396
2.4375	-0.021
2.4395	-0.00679
2.4414	0.0135
2.4434	0.0378
2.4453	0.0414
2.4473	0.0284
2.4492	0.0144
2.4512	-0.0019
2.4531	-0.0282
2.4551	-0.0502
2.457	-0.0454
2.459	-0.0263
2.4609	-0.00932
2.4629	0.0101
2.4648	0.0339
2.4668	0.0428
2.4688	0.0335
2.4707	0.021
2.4727	0.0067
2.4746	-0.0186
2.4766	-0.0494
2.4785	-0.0521
2.4805	-0.0345
2.4824	-0.0168
2.4844	0.00236
2.4863	0.0301
2.4883	0.0449
2.4902	0.0357
2.4922	0.0222
2.4941	0.00779
2.4961	-0.013
2.498	-0.0431
2.5	-0.0523
2.502	-0.0361
2.5039	-0.0158
2.5059	0.00139
2.5078	0.0266
2.5098	0.0448
2.5117	0.0401
2.5137	0.0276
2.5156	0.012
2.5176	-0.012
2.5195	-0.0469
2.5215	-0.0592
2.5234	-0.0417
2.5254	-0.0207
2.5273	-0.000192
2.5293	0.0265
2.5313	0.0465
2.5332	0.0424
2.5352	0.0275
2.5371	0.0122
2.5391	-0.00917
2.541	-0.0416
2.543	-0.0573
2.5449	-0.0431
2.5469	-0.0206
2.5488	-0.00162
2.5508	0.0251
2.5527	0.048
2.5547	0.0437
2.5566	0.0284
2.5586	0.0103
2.5605	-0.0138
2.5625	-0.0462
2.5645	-0.0585
2.5664	-0.0411
2.5684	-0.0193
2.5703	0.00214
2.5723	0.0274
2.5742	0.0471
2.5762	0.0428
2.5781	0.0284
2.5801	0.0127
2.582	-0.00977
2.584	-0.0439
2.5859	-0.0591
2.5879	-0.0438
2.5898	-0.0231
2.5918	-0.00209
2.5938	0.028
2.5957	0.0493
2.5977	0.043
2.5996	0.0285
2.6016	0.0107
2.6035	-0.0144
2.6055	-0.0472
2.6074	-0.0581
2.6094	-0.0412
2.6113	-0.0189
2.6133	0.00377
2.6152	0.0344
2.6172	0.0527
2.6191	0.0452
2.6211	0.0284
2.623	0.00817
2.625	-0.0226
2.627	-0.0587
2.6289	-0.062
2.6309	-0.0407
2.6328	-0.0159
2.6348	0.0116
2.6367	0.0426
2.6387	0.0534
2.6406	0.0401
2.6426	0.0228
2.6445	0.00259
2.6465	-0.029
2.6484	-0.0596
2.6504	-0.0563
2.6523	-0.0324
2.6543	-0.00881
2.6563	0.0184
2.6582	0.049
2.6602	0.0533
2.6621	0.0375
2.6641	0.0179
2.666	-0.00858
2.668	-0.0449
2.6699	-0.0658
2.6719	-0.0515
2.6738	-0.0251
2.6758	0.000289
2.6777	0.0306
2.6797	0.0541
2.6816	0.049
2.6836	0.032
2.6855	0.0126
2.6875	-0.0159
2.6895	-0.0532
2.6914	-0.0644
2.6934	-0.0445
2.6953	-0.0197
2.6973	0.00706
2.6992	0.0411
2.7012	0.0569
2.7031	0.044
2.7051	0.0253
2.707	0.00126
2.709	-0.0328
2.7109	-0.0628
2.7129	-0.0579
2.7148	-0.0328
2.7168	-0.00704
2.7188	0.0225
2.7207	0.0531
2.7227	0.0563
2.7246	0.0402
2.7266	0.0175
2.7285	-0.012
2.7305	-0.0536
2.7324	-0.0716
2.7344	-0.0523
2.7363	-0.0242
2.7383	0.00549
2.7402	0.0422
2.7422	0.0612
2.7441	0.0502
2.7461	0.0293
2.748	0.00406
2.75	-0.0329
2.752	-0.0673
2.7539	-0.0638
2.7559	-0.036
2.7578	-0.00742
2.7598	0.0261
2.7617	0.0589
2.7637	0.0606
2.7656	0.0414
2.7676	0.0152
2.7695	-0.0199
2.7715	-0.0622
2.7734	-0.0744
2.7754	-0.0499
2.7773	-0.0184
2.7793	0.0139
2.7813	0.0493
2.7832	0.0641
2.7852	0.0493
2.7871	0.0266
2.7891	-0.00224
2.791	-0.0441
2.793	-0.0743
2.7949	-0.0623
2.7969	-0.0318
2.7988	-0.00144
2.8008	0.0365
2.8027	0.0648
2.8047	0.0579
2.8066	0.0366
2.8086	0.00767
2.8105	-0.032
2.8125	-0.0712
2.8145	-0.0703
2.8164	-0.0412
2.8184	-0.00908
2.8203	0.0277
2.8223	0.0621
2.8242	0.0661
2.8262	0.0466
2.8281	0.0188
2.8301	-0.0211
2.832	-0.07
2.834	-0.0818
2.8359	-0.0546
2.8379	-0.0197
2.8398	0.0189
2.8418	0.0596
2.8438	0.0705
2.8457	0.0527
2.8477	0.0248
2.8496	-0.0133
2.8516	-0.0618
2.8535	-0.0842
2.8555	-0.0606
2.8574	-0.0236
2.8594	0.0148
2.8613	0.0579
2.8633	0.0752
2.8652	0.0589
2.8672	0.0295
2.8691	-0.0107
2.8711	-0.0637
2.873	-0.0911
2.875	-0.0677
2.877	-0.0271
2.8789	0.0143
2.8809	0.0565
2.8828	0.075
2.8848	0.0602
2.8867	0.0324
2.8887	-0.00473
2.8906	-0.0567
2.8926	-0.0905
2.8945	-0.0719
2.8965	-0.031
2.8984	0.00969
2.9004	0.0553
2.9023	0.0764
2.9043	0.0619
2.9063	0.0347
2.9082	-0.00481
2.9102	-0.0581
2.9121	-0.0919
2.9141	-0.0726
2.916	-0.0314
2.918	0.0129
2.9199	0.0592
2.9219	0.0805
2.9238	0.0662
2.9258	0.0377
2.9277	-0.00398
2.9297	-0.0638
2.9316	-0.102
2.9336	-0.08
2.9355	-0.0355
2.9375	0.0152
2.9395	0.0665
2.9414	0.0848
2.9434	0.067
2.9453	0.0354
2.9473	-0.0106
2.9492	-0.0715
2.9512	-0.103
2.9531	-0.0787
2.9551	-0.0285
2.957	0.0271
2.959	0.0796
2.9609	0.0916
2.9629	0.0662
2.9648	0.0284
2.9668	-0.0247
2.9688	-0.0887
2.9707	-0.109
2.9727	-0.0738
2.9746	-0.0195
2.9766	0.0429
2.9785	0.0895
2.9805	0.0901
2.9824	0.0582
2.9844	0.0177
2.9863	-0.0378
2.9883	-0.0955
2.9902	-0.105
2.9922	-0.063
2.9941	-0.0065
2.9961	0.0568
2.998	0.0979
3	0.0847
3.002	0.0477
3.0039	0.00266
3.0059	-0.0585
3.0078	-0.105
3.0098	-0.0965
3.0117	-0.0489
3.0137	0.0112
3.0156	0.0756
3.0176	0.104
3.0195	0.0811
3.0215	0.0398
3.0234	-0.0127
3.0254	-0.0799
3.0273	-0.116
3.0293	-0.0901
3.0313	-0.0379
3.0332	0.0317
3.0352	0.0951
3.0371	0.105
3.0391	0.0733
3.041	0.0245
3.043	-0.0402
3.0449	-0.103
3.0469	-0.116
3.0488	-0.0744
3.0508	-0.012
3.0527	0.0654
3.0547	0.116
3.0566	0.105
3.0586	0.0594
3.0605	-0.00241
3.0625	-0.0823
3.0645	-0.129
3.0664	-0.108
3.0684	-0.052
3.0703	0.026
3.0723	0.101
3.0742	0.123
3.0762	0.0908
3.0781	0.0333
3.0801	-0.043
3.082	-0.116
3.084	-0.13
3.0859	-0.0826
3.0879	-0.0134
3.0898	0.0717
3.0918	0.127
3.0938	0.114
3.0957	0.0639
3.0977	-0.00985
3.0996	-0.0955
3.1016	-0.139
3.1035	-0.111
3.1055	-0.0453
3.1074	0.0387
3.1094	0.114
3.1113	0.131
3.1133	0.0932
3.1152	0.0271
3.1172	-0.0611
3.1191	-0.137
3.1211	-0.137
3.123	-0.0798
3.125	0.00113
3.127	0.0934
3.1289	0.137
3.1309	0.116
3.1328	0.0571
3.1348	-0.0291
3.1367	-0.118
3.1387	-0.149
3.1406	-0.106
3.1426	-0.0279
3.1445	0.0694
3.1465	0.139
3.1484	0.137
3.1504	0.083
3.1523	7.37e-05
3.1543	-0.105
3.1563	-0.16
3.1582	-0.132
3.1602	-0.0583
3.1621	0.0442
3.1641	0.132
3.166	0.15
3.168	0.106
3.1699	0.027
3.1719	-0.0794
3.1738	-0.157
3.1758	-0.15
3.1777	-0.081
3.1797	0.0196
3.1816	0.124
3.1836	0.16
3.1855	0.124
3.1875	0.0462
3.1895	-0.0659
3.1914	-0.158
3.1934	-0.163
3.1953	-0.0987
3.1973	0.00299
3.1992	0.114
3.2012	0.165
3.2031	0.14
3.2051	0.0654
3.207	-0.0485
3.209	-0.157
3.2109	-0.177
3.2129	-0.117
3.2148	-0.0142
3.2168	0.107
3.2188	0.17
3.2207	0.152
3.2227	0.0789
3.2246	-0.0393
3.2266	-0.155
3.2285	-0.185
3.2305	-0.127
3.2324	-0.0206
3.2344	0.107
3.2363	0.18
3.2383	0.164
3.2402	0.0873
3.2422	-0.0379
3.2441	-0.165
3.2461	-0.197
3.248	-0.139
3.25	-0.024
3.252	0.111
3.2539	0.186
3.2559	0.172
3.2578	0.0928
3.2598	-0.0387
3.2617	-0.168
3.2637	-0.204
3.2656	-0.141
3.2676	-0.0199
3.2695	0.123
3.2715	0.197
3.2734	0.176
3.2754	0.0906
3.2773	-0.0542
3.2793	-0.187
3.2813	-0.213
3.2832	-0.14
3.2852	-0.00574
3.2871	0.14
3.2891	0.209
3.291	0.181
3.293	0.0838
3.2949	-0.0718
3.2969	-0.207
3.2988	-0.223
3.3008	-0.138
3.3027	0.0117
3.3047	0.164
3.3066	0.22
3.3086	0.183
3.3105	0.0679
3.3125	-0.101
3.3145	-0.228
3.3164	-0.226
3.3184	-0.124
3.3203	0.045
3.3223	0.195
3.3242	0.238
3.3262	0.18
3.3281	0.0435
3.3301	-0.143
3.332	-0.255
3.334	-0.232
3.3359	-0.105
3.3379	0.0844
3.3398	0.224
3.3418	0.247
3.3438	0.171
3.3457	0.00805
3.3477	-0.184
3.3496	-0.275
3.3516	-0.225
3.3535	-0.0686
3.3555	0.135
3.3574	0.259
3.3594	0.253
3.3613	0.148
3.3633	-0.0487
3.3652	-0.235
3.3672	-0.293
3.3691	-0.208
3.3711	-0.014
3.373	0.191
3.375	0.288
3.377	0.253
3.3789	0.109
3.3809	-0.113
3.3828	-0.284
3.3848	-0.302
3.3867	-0.177
3.3887	0.0536
3.3906	0.25
3.3926	0.309
3.3945	0.236
3.3965	0.0448
3.3984	-0.19
3.4004	-0.323
3.4023	-0.295
3.4043	-0.116
3.4063	0.136
3.4082	0.305
3.4102	0.324
3.4121	0.2
3.4141	-0.0407
3.416	-0.271
3.418	-0.357
3.4199	-0.271
3.4219	-0.0309
3.4238	0.219
3.4258	0.347
3.4277	0.317
3.4297	0.135
3.4316	-0.136
3.4336	-0.336
3.4355	-0.368
3.4375	-0.213
3.4395	0.0743
3.4414	0.305
3.4434	0.381
3.4453	0.284
3.4473	0.0338
3.4492	-0.239
3.4512	-0.39
3.4531	-0.355
3.4551	-0.122
3.457	0.177
3.459	0.372
3.4609	0.396
3.4629	0.228
3.4648	-0.0692
3.4668	-0.328
3.4688	-0.432
3.4707	-0.318
3.4727	-0.0182
3.4746	0.272
3.4766	0.427
3.4785	0.382
3.4805	0.138
3.4824	-0.177
3.4844	-0.407
3.4863	-0.445
3.4883	-0.237
3.4902	0.101
3.4922	0.375
3.4941	0.468
3.4961	0.324
3.498	0.0114
3.5	-0.302
3.502	-0.482
3.5039	-0.408
3.5059	-0.111
3.5078	0.235
3.5098	0.463
3.5117	0.459
3.5137	0.218
3.5156	-0.129
3.5176	-0.418
3.5195	-0.507
3.5215	-0.313
3.5234	0.043
3.5254	0.371
3.5273	0.512
3.5293	0.384
3.5313	0.0717
3.5332	-0.28
3.5352	-0.507
3.5371	-0.461
3.5391	-0.167
3.541	0.215
3.543	0.483
3.5449	0.492
3.5469	0.25
3.5488	-0.105
3.5508	-0.429
3.5527	-0.529
3.5547	-0.341
3.5566	0.0235
3.5586	0.383
3.5605	0.523
3.5625	0.39
3.5645	0.0741
3.5664	-0.29
3.5684	-0.515
3.5703	-0.462
3.5723	-0.167
3.5742	0.225
3.5762	0.489
3.5781	0.477
3.5801	0.236
3.582	-0.128
3.584	-0.441
3.5859	-0.509
3.5879	-0.315
3.5898	0.0578
3.5918	0.394
3.5938	0.496
3.5957	0.345
3.5977	0.0315
3.5996	-0.318
3.6016	-0.492
3.6035	-0.408
3.6055	-0.105
3.6074	0.267
3.6094	0.461
3.6113	0.406
3.6133	0.153
3.6152	-0.191
3.6172	-0.427
3.6191	-0.437
3.6211	-0.216
3.623	0.135
3.625	0.389
3.627	0.416
3.6289	0.239
3.6309	-0.077
3.6328	-0.346
3.6348	-0.419
3.6367	-0.277
3.6387	0.0359
3.6406	0.302
3.6426	0.381
3.6445	0.265
3.6465	0.002
3.6484	-0.259
3.6504	-0.368
3.6523	-0.288
3.6543	-0.0336
3.6563	0.228
3.6582	0.333
3.6602	0.265
3.6621	0.0417
3.6641	-0.196
3.666	-0.311
3.668	-0.268
3.6699	-0.0664
3.6719	0.159
3.6738	0.271
3.6758	0.24
3.6777	0.0726
3.6797	-0.135
3.6816	-0.249
3.6836	-0.239
3.6855	-0.0812
3.6875	0.11
3.6895	0.208
3.6914	0.199
3.6934	0.0684
3.6953	-0.0923
3.6973	-0.187
3.6992	-0.185
3.7012	-0.0705
3.7031	0.0751
3.7051	0.15
3.707	0.151
3.709	0.0544
3.7109	-0.0705
3.7129	-0.136
3.7148	-0.135
3.7168	-0.0389
3.7188	0.0608
3.7207	0.102
3.7227	0.0923
3.7246	0.0198
3.7266	-0.0594
3.7285	-0.0904
3.7305	-0.076
3.7324	0.000194
3.7344	0.0653
3.7363	0.0693
3.7383	0.0431
3.7402	-0.0286
3.7422	-0.0728
3.7441	-0.0673
3.7461	-0.0247
3.748	0.0493
3.75	0.0801
3.752	0.0516
3.7539	-0.000827
3.7559	-0.0707
3.7578	-0.0894
3.7598	-0.0495
3.7617	0.0179
3.7637	0.096
3.7656	0.0952
3.7676	0.0401
3.7695	-0.0421
3.7715	-0.118
3.7734	-0.113
3.7754	-0.0427
3.7773	0.0632
3.7793	0.142
3.7813	0.119
3.7832	0.0313
3.7852	-0.078
3.7871	-0.16
3.7891	-0.133
3.791	-0.0399
3.793	0.0977
3.7949	0.174
3.7969	0.132
3.7988	0.0254
3.8008	-0.109
3.8027	-0.185
3.8047	-0.148
3.8066	-0.0291
3.8086	0.126
3.8105	0.195
3.8125	0.138
3.8145	0.0141
3.8164	-0.138
3.8184	-0.199
3.8203	-0.153
3.8223	-0.0162
3.8242	0.141
3.8262	0.195
3.8281	0.137
3.8301	0.00337
3.832	-0.143
3.834	-0.191
3.8359	-0.141
3.8379	-1.32e-05
3.8398	0.139
3.8418	0.171
3.8438	0.118
3.8457	-0.0163
3.8477	-0.133
3.8496	-0.168
3.8516	-0.111
3.8535	0.0215
3.8555	0.122
3.8574	0.137
3.8594	0.0843
3.8613	-0.0338
3.8633	-0.11
3.8652	-0.127
3.8672	-0.065
3.8691	0.0388
3.8711	0.0863
3.873	0.0886
3.875	0.0317
3.877	-0.0442
3.8789	-0.0768
3.8809	-0.0677
3.8828	-0.00257
3.8848	0.0519
3.8867	0.0523
3.8887	0.0309
3.8906	-0.0305
3.8926	-0.0547
3.8945	-0.0467
3.8965	-0.00028
3.8984	0.0556
3.9004	0.0527
3.9023	0.0192
[truncated: 2,098 more rows]
