# Supplementary material for: Effect of the Supports’ Positions on the Vibration Characteristics of a Flexible Rotor Shafting
Source: Hindawi journal article supplement (doi:10.1155/2020/1592794), 2020-02-12
Supplement: f1 [file 1592794.f1.zip › 1592794.f1/test_data/Table11_11.xlsx]

## Sheet: Sheet1
Time t/s	vibration deformation amount u/mm
0	-0.000534
0.002	-0.00101
0.0039	-0.00125
0.0059	-0.00097
0.0078	-0.000952
0.0098	-0.000942
0.0117	-0.00111
0.0137	-0.00109
0.0156	-0.00127
0.0176	-0.00135
0.0195	-0.00118
0.0215	-0.00107
0.0234	-0.00132
0.0254	-0.000926
0.0273	-0.0012
0.0293	-0.00173
0.0313	-0.00125
0.0332	-0.00171
0.0352	-0.00155
0.0371	-0.0014
0.0391	-0.0017
0.041	-0.00179
0.043	-0.0021
0.0449	-0.00217
0.0469	-0.00209
0.0488	-0.00257
0.0508	-0.00212
0.0527	-0.00268
0.0547	-0.00256
0.0566	-0.00308
0.0586	-0.00324
0.0605	-0.00328
0.0625	-0.00339
0.0645	-0.00339
0.0664	-0.00353
0.0684	-0.00385
0.0703	-0.00377
0.0723	-0.00393
0.0742	-0.00399
0.0762	-0.00416
0.0781	-0.00396
0.0801	-0.00421
0.082	-0.00459
0.084	-0.00517
0.0859	-0.00492
0.0879	-0.00519
0.0898	-0.00567
0.0918	-0.00599
0.0938	-0.00552
0.0957	-0.00632
0.0977	-0.00644
0.0996	-0.00665
0.1016	-0.00668
0.1035	-0.00755
0.1055	-0.00725
0.1074	-0.00731
0.1094	-0.0073
0.1113	-0.00765
0.1133	-0.00777
0.1152	-0.00821
0.1172	-0.00868
0.1191	-0.00897
0.1211	-0.00937
0.123	-0.00926
0.125	-0.0093
0.127	-0.00889
0.1289	-0.0094
0.1309	-0.00992
0.1328	-0.0102
0.1348	-0.0109
0.1367	-0.0105
0.1387	-0.0106
0.1406	-0.00976
0.1426	-0.00899
0.1445	-0.00889
0.1465	-0.00883
0.1484	-0.00943
0.1504	-0.0099
0.1523	-0.00983
0.1543	-0.00957
0.1563	-0.00886
0.1582	-0.00836
0.1602	-0.00796
0.1621	-0.00723
0.1641	-0.0073
0.166	-0.0074
0.168	-0.00722
0.1699	-0.00706
0.1719	-0.00626
0.1738	-0.00427
0.1758	-0.00239
0.1777	-0.000844
0.1797	-0.000652
0.1816	-0.00203
0.1836	-0.00331
0.1855	-0.0036
0.1875	-0.00156
0.1895	0.000538
0.1914	0.00289
0.1934	0.0056
0.1953	0.00693
0.1973	0.00669
0.1992	0.00494
0.2012	0.00496
0.2031	0.00473
0.2051	0.00668
0.207	0.00932
0.209	0.0112
0.2109	0.0124
0.2129	0.0127
0.2148	0.0125
0.2168	0.0122
0.2188	0.0123
0.2207	0.0135
0.2227	0.0152
0.2246	0.0175
0.2266	0.0194
0.2285	0.02
0.2305	0.0205
0.2324	0.0202
0.2344	0.0198
0.2363	0.0205
0.2383	0.0211
0.2402	0.0219
0.2422	0.0218
0.2441	0.0214
0.2461	0.0214
0.248	0.0216
0.25	0.022
0.252	0.0223
0.2539	0.0218
0.2559	0.0208
0.2578	0.0185
0.2598	0.0171
0.2617	0.0151
0.2637	0.0139
0.2656	0.0142
0.2676	0.0144
0.2695	0.0143
0.2715	0.013
0.2734	0.0113
0.2754	0.00955
0.2773	0.00665
0.2793	0.00487
0.2813	0.0044
0.2832	0.00455
0.2852	0.00538
0.2871	0.00576
0.2891	0.00614
0.291	0.00524
0.293	0.00444
0.2949	0.00476
0.2969	0.00639
0.2988	0.0081
0.3008	0.00936
0.3027	0.00995
0.3047	0.00974
0.3066	0.0108
0.3086	0.011
0.3105	0.0123
0.3125	0.0141
0.3145	0.0162
0.3164	0.0182
0.3184	0.0194
0.3203	0.0213
0.3223	0.0228
0.3242	0.0241
0.3262	0.0254
0.3281	0.0274
0.3301	0.0285
0.332	0.0283
0.334	0.0253
0.3359	0.0197
0.3379	0.0142
0.3398	0.00935
0.3418	0.00689
0.3438	0.00647
0.3457	0.00752
0.3477	0.00728
0.3496	0.00567
0.3516	0.00148
0.3535	-0.0017
0.3555	-0.00415
0.3574	-0.00451
0.3594	-0.00339
0.3613	-0.00118
0.3633	0.00217
0.3652	0.00443
0.3672	0.00394
0.3691	0.00333
0.3711	0.00363
0.373	0.0068
0.375	0.0109
0.377	0.0132
0.3789	0.0142
0.3809	0.0137
0.3828	0.0125
0.3848	0.0104
0.3867	0.00818
0.3887	0.00651
0.3906	0.0054
0.3926	0.00411
0.3945	0.00234
0.3965	0.000522
0.3984	-0.0015
0.4004	-0.00529
0.4023	-0.00994
0.4043	-0.0124
0.4063	-0.0118
0.4082	-0.00786
0.4102	-0.00281
0.4121	0.00172
0.4141	0.00383
0.416	0.00471
0.418	0.00349
0.4199	0.00269
0.4219	0.0028
0.4238	0.00438
0.4258	0.00766
0.4277	0.012
0.4297	0.0166
0.4316	0.0185
0.4336	0.0176
0.4355	0.0137
0.4375	0.0107
0.4395	0.00864
0.4414	0.0079
0.4434	0.00906
0.4453	0.0114
0.4473	0.0142
0.4492	0.0152
0.4512	0.0136
0.4531	0.0112
0.4551	0.011
0.457	0.0133
0.459	0.0164
0.4609	0.0207
0.4629	0.0237
0.4648	0.024
0.4668	0.0206
0.4688	0.016
0.4707	0.0121
0.4727	0.00847
0.4746	0.00528
0.4766	0.000479
0.4785	-0.00531
0.4805	-0.00885
0.4824	-0.0102
0.4844	-0.0101
0.4863	-0.0069
0.4883	0.00052
0.4902	0.00778
0.4922	0.0121
0.4941	0.0126
0.4961	0.0116
0.498	0.0101
0.5	0.00792
0.502	0.00261
0.5039	-0.00377
0.5059	-0.0115
0.5078	-0.0173
0.5098	-0.0203
0.5117	-0.0178
0.5137	-0.0129
0.5156	-0.00573
0.5176	0.000707
0.5195	0.0072
0.5215	0.0136
0.5234	0.0205
0.5254	0.0237
0.5273	0.0216
0.5293	0.0147
0.5313	0.00661
0.5332	-0.00192
0.5352	-0.0059
0.5371	-0.00299
0.5391	0.00513
0.541	0.0132
0.543	0.0193
0.5449	0.0233
0.5469	0.0262
0.5488	0.0254
0.5508	0.0216
0.5527	0.0163
0.5547	0.0117
0.5566	0.00743
0.5586	0.00223
0.5605	-0.000224
0.5625	-4.01e-05
0.5645	0.00222
0.5664	0.00486
0.5684	0.00573
0.5703	0.00642
0.5723	0.00644
0.5742	0.00503
0.5762	0.00248
0.5781	0.000377
0.5801	-0.000975
0.582	-0.00248
0.584	-0.00323
0.5859	-0.00448
0.5879	-0.00481
0.5898	-0.00537
0.5918	-0.0068
0.5938	-0.00949
0.5957	-0.00846
0.5977	-0.00579
0.5996	0.000586
0.6016	0.0103
0.6035	0.0206
0.6055	0.0266
0.6074	0.0268
0.6094	0.0198
0.6113	0.00821
0.6133	-0.0024
0.6152	-0.0073
0.6172	-0.00457
0.6191	0.00658
0.6211	0.0205
0.623	0.0323
0.625	0.0357
0.627	0.0317
0.6289	0.0224
0.6309	0.00857
0.6328	-0.00703
0.6348	-0.0181
0.6367	-0.0221
0.6387	-0.0165
0.6406	-0.00582
0.6426	0.00634
0.6445	0.0149
0.6465	0.0186
0.6484	0.0173
0.6504	0.0107
0.6523	0.000214
0.6543	-0.0143
0.6563	-0.0257
0.6582	-0.0279
0.6602	-0.0215
0.6621	-0.0109
0.6641	0.00231
0.666	0.0154
0.668	0.0234
0.6699	0.0237
0.6719	0.0165
0.6738	0.00456
0.6758	-0.00456
0.6777	-0.00759
0.6797	-0.00139
0.6816	0.0113
0.6836	0.0243
0.6855	0.0326
0.6875	0.0343
0.6895	0.0261
0.6914	0.0135
0.6934	0.00173
0.6953	-0.00304
0.6973	-0.00274
0.6992	0.00439
0.7012	0.0135
0.7031	0.0174
0.7051	0.012
0.707	-0.000229
0.709	-0.0124
0.7109	-0.0179
0.7129	-0.0162
0.7148	-0.0072
0.7168	0.00442
0.7188	0.0117
0.7207	0.0118
0.7227	0.00216
0.7246	-0.0146
0.7266	-0.0289
0.7285	-0.0288
0.7305	-0.0166
0.7324	0.00678
0.7344	0.0313
0.7363	0.0482
0.7383	0.0459
0.7402	0.0231
0.7422	-0.00818
0.7441	-0.0289
0.7461	-0.0316
0.748	-0.0112
0.75	0.0188
0.752	0.0481
0.7539	0.063
0.7559	0.0535
0.7578	0.02
0.7598	-0.0216
0.7617	-0.0486
0.7637	-0.0513
0.7656	-0.0319
0.7676	0.00242
0.7695	0.0384
0.7715	0.0556
0.7734	0.0445
0.7754	0.0105
0.7773	-0.0295
0.7793	-0.0578
0.7813	-0.0607
0.7832	-0.0381
0.7852	0.000387
0.7871	0.0366
0.7891	0.0522
0.791	0.041
0.793	0.0141
0.7949	-0.0137
0.7969	-0.0291
0.7988	-0.0258
0.8008	-0.00285
0.8027	0.0279
0.8047	0.0493
0.8066	0.0511
0.8086	0.0336
0.8105	0.00933
0.8125	-0.0101
0.8145	-0.0173
0.8164	-0.00917
0.8184	0.00791
0.8203	0.0201
0.8223	0.0158
0.8242	-0.000285
0.8262	-0.015
0.8281	-0.0218
0.8301	-0.0187
0.832	-0.00455
0.834	0.0119
0.8359	0.0174
0.8379	0.0081
0.8398	-0.0137
0.8418	-0.0346
0.8438	-0.0393
0.8457	-0.0253
0.8477	0.00558
0.8496	0.0392
0.8516	0.0601
0.8535	0.05
0.8555	0.0161
0.8574	-0.0209
0.8594	-0.0407
0.8613	-0.0341
0.8633	-0.0031
0.8652	0.0369
0.8672	0.0696
0.8691	0.0713
0.8711	0.0383
0.873	-0.0128
0.875	-0.0502
0.877	-0.061
0.8789	-0.0417
0.8809	-0.00133
0.8828	0.0414
0.8848	0.0605
0.8867	0.0455
0.8887	0.0019
0.8906	-0.0437
0.8926	-0.0664
0.8945	-0.0595
0.8965	-0.0272
0.8984	0.0149
0.9004	0.0498
0.9023	0.0591
0.9043	0.0412
0.9063	0.00833
0.9082	-0.0201
0.9102	-0.0313
0.9121	-0.0229
0.9141	0.000447
0.916	0.0325
0.918	0.0517
0.9199	0.051
0.9219	0.0323
0.9238	0.00587
0.9258	-0.018
0.9277	-0.0338
0.9297	-0.0367
0.9316	-0.022
0.9336	0.00203
0.9355	0.0225
0.9375	0.0281
0.9395	0.023
0.9414	0.00356
0.9434	-0.0238
0.9453	-0.0435
0.9473	-0.0465
0.9492	-0.0269
0.9512	0.00162
0.9531	0.0294
0.9551	0.0442
0.957	0.0414
0.959	0.02
0.9609	-0.00749
0.9629	-0.0221
0.9648	-0.0174
0.9668	0.00221
0.9688	0.0274
0.9707	0.0416
0.9727	0.0444
0.9746	0.0279
0.9766	0.00223
0.9785	-0.0199
0.9805	-0.0254
0.9824	-0.0198
0.9844	-0.00656
0.9863	0.00541
0.9883	0.0116
0.9902	0.0084
0.9922	-0.00139
0.9941	-0.0167
0.9961	-0.0204
0.998	-0.0207
1	-0.015
1.002	-0.00774
1.0039	0.00437
1.0059	0.0184
1.0078	0.026
1.0098	0.0241
1.0117	0.0159
1.0137	0.00419
1.0156	-0.0049
1.0176	-0.00538
1.0195	0.00373
1.0215	0.0177
1.0234	0.0305
1.0254	0.0308
1.0273	0.0166
1.0293	-0.0049
1.0313	-0.0255
1.0332	-0.032
1.0352	-0.0219
1.0371	-0.000913
1.0391	0.0183
1.041	0.0241
1.043	0.00901
1.0449	-0.0143
1.0469	-0.0345
1.0488	-0.0381
1.0508	-0.023
1.0527	0.00351
1.0547	0.0289
1.0566	0.0393
1.0586	0.033
1.0605	0.0149
1.0625	-0.00255
1.0645	-0.0119
1.0664	-0.00489
1.0684	0.0108
1.0703	0.0257
1.0723	0.0347
1.0742	0.0304
1.0762	0.0157
1.0781	-0.00473
1.0801	-0.0246
1.082	-0.0343
1.084	-0.0272
1.0859	-0.0106
1.0879	0.0104
1.0898	0.0222
1.0918	0.0173
1.0938	-0.000427
1.0957	-0.0247
1.0977	-0.043
1.0996	-0.0405
1.1016	-0.0137
1.1035	0.0222
1.1055	0.0499
1.1074	0.0535
1.1094	0.0339
1.1113	0.000628
1.1133	-0.0275
1.1152	-0.031
1.1172	-0.0122
1.1191	0.0211
1.1211	0.0481
1.123	0.0516
1.125	0.0309
1.127	-0.00496
1.1289	-0.0369
1.1309	-0.0482
1.1328	-0.0351
1.1348	-0.00812
1.1367	0.0192
1.1387	0.0284
1.1406	0.0204
1.1426	-0.00121
1.1445	-0.0264
1.1465	-0.039
1.1484	-0.0333
1.1504	-0.0073
1.1523	0.0252
1.1543	0.0485
1.1563	0.0526
1.1582	0.0374
1.1602	0.00805
1.1621	-0.0171
1.1641	-0.0282
1.166	-0.0163
1.168	0.0105
1.1699	0.0347
1.1719	0.041
1.1738	0.0209
1.1758	-0.0119
1.1777	-0.0399
1.1797	-0.0484
1.1816	-0.0335
1.1836	-0.00496
1.1855	0.018
1.1875	0.0267
1.1895	0.0123
1.1914	-0.0108
1.1934	-0.0285
1.1953	-0.0294
1.1973	-0.0114
1.1992	0.0133
1.2012	0.035
1.2031	0.0445
1.2051	0.0367
1.207	0.0205
1.209	0.00099
1.2109	-0.0119
1.2129	-0.0127
1.2148	-0.00263
1.2168	0.0128
1.2188	0.0245
1.2207	0.0209
1.2227	0.0058
1.2246	-0.015
1.2266	-0.0322
1.2285	-0.0364
1.2305	-0.027
1.2324	-0.00569
1.2344	0.0125
1.2363	0.0174
1.2383	0.00953
1.2402	-0.0025
1.2422	-0.00669
1.2441	-0.00427
1.2461	0.00618
1.248	0.0175
1.25	0.0245
1.252	0.0244
1.2539	0.0183
1.2559	0.00954
1.2578	0.00508
1.2598	0.000781
1.2617	-0.00305
1.2637	-0.00922
1.2656	-0.0106
1.2676	-0.00575
1.2695	-0.000675
1.2715	0.0026
1.2734	-0.00255
1.2754	-0.0118
1.2773	-0.0189
1.2793	-0.02
1.2813	-0.0127
1.2832	0.00107
1.2852	0.0148
1.2871	0.0197
1.2891	0.0189
1.291	0.0167
1.293	0.0135
1.2949	0.0115
1.2969	0.0106
1.2988	0.00973
1.3008	0.0115
1.3027	0.011
1.3047	0.01
1.3066	0.00487
1.3086	-0.00564
1.3105	-0.017
1.3125	-0.0251
1.3145	-0.0207
1.3164	-0.0113
1.3184	-0.00059
1.3203	0.0044
1.3223	0.000153
1.3242	-0.0103
1.3262	-0.015
1.3281	-0.0099
1.3301	0.00509
1.332	0.0204
1.334	0.0282
1.3359	0.0254
1.3379	0.0169
1.3398	0.00792
1.3418	0.00188
1.3438	0.00103
1.3457	0.00321
1.3477	0.00696
1.3496	0.00584
1.3516	0.0025
1.3535	-0.00258
1.3555	-0.00903
1.3574	-0.0154
1.3594	-0.0229
1.3613	-0.021
1.3633	-0.0107
1.3652	0.00103
1.3672	0.00898
1.3691	0.01
1.3711	0.00898
1.373	0.00586
1.375	0.00764
1.377	0.013
1.3789	0.0184
1.3809	0.021
1.3828	0.0175
1.3848	0.0132
1.3867	0.00705
1.3887	0.00246
1.3906	-0.00567
1.3926	-0.0157
1.3945	-0.0214
1.3965	-0.0176
1.3984	-0.0085
1.4004	-0.00191
1.4023	0.000311
1.4043	-0.00335
1.4063	-0.0131
1.4082	-0.0167
1.4102	-0.0111
1.4121	0.00276
1.4141	0.016
1.416	0.0261
1.418	0.028
1.4199	0.0256
1.4219	0.018
1.4238	0.00856
1.4258	-0.000226
1.4277	-0.00429
1.4297	-0.000779
1.4316	0.00431
1.4336	0.00471
1.4355	0.000616
1.4375	-0.011
1.4395	-0.0212
1.4414	-0.0271
1.4434	-0.0201
1.4453	-0.00926
1.4473	0.00183
1.4492	0.00672
1.4512	0.0106
1.4531	0.0124
1.4551	0.0146
1.457	0.0149
1.459	0.0129
1.4609	0.0104
1.4629	0.00867
1.4648	0.0106
1.4668	0.0122
1.4688	0.00973
1.4707	0.000715
1.4727	-0.0124
1.4746	-0.0193
1.4766	-0.0195
1.4785	-0.0128
1.4805	-0.0103
1.4824	-0.00616
1.4844	-0.00558
1.4863	-0.00262
1.4883	-0.000788
1.4902	0.00239
1.4922	0.0032
1.4941	0.00942
1.4961	0.0191
1.498	0.0279
1.5	0.0283
1.502	0.0206
1.5039	0.00879
1.5059	-0.00117
1.5078	-0.00501
1.5098	-0.00687
1.5117	-0.00672
1.5137	-0.0108
1.5156	-0.015
1.5176	-0.0166
1.5195	-0.0143
1.5215	-0.0085
1.5234	-0.00832
1.5254	-0.00774
1.5273	-0.00237
1.5293	0.00714
1.5313	0.0157
1.5332	0.0205
1.5352	0.0192
1.5371	0.0165
1.5391	0.0102
1.541	0.00774
1.543	0.00575
1.5449	0.00535
1.5469	0.00186
1.5488	-0.00351
1.5508	-0.00857
1.5527	-0.0131
1.5547	-0.0193
1.5566	-0.0243
1.5586	-0.0177
1.5605	-0.00641
1.5625	0.00557
1.5645	0.011
1.5664	0.01
1.5684	0.00795
1.5703	0.0114
1.5723	0.0173
1.5742	0.0207
1.5762	0.0177
1.5781	0.0141
1.5801	0.00919
1.582	0.00432
1.584	-0.00384
1.5859	-0.0148
1.5879	-0.0241
1.5898	-0.0258
1.5918	-0.0209
1.5938	-0.0103
1.5957	-0.00111
1.5977	-0.00066
1.5996	-0.00129
1.6016	0.0003
1.6035	0.00417
1.6055	0.00797
1.6074	0.013
1.6094	0.0204
1.6113	0.026
1.6133	0.0245
1.6152	0.0156
1.6172	0.00358
1.6191	-0.00338
1.6211	-0.00927
1.623	-0.0132
1.625	-0.0189
1.627	-0.0222
1.6289	-0.0199
1.6309	-0.00982
1.6328	-0.00188
1.6348	0.00281
1.6367	0.00382
1.6387	0.00504
1.6406	0.00755
1.6426	0.0159
1.6445	0.0221
1.6465	0.0221
1.6484	0.0145
1.6504	0.00936
1.6523	0.00528
1.6543	-0.000657
1.6563	-0.012
1.6582	-0.0195
1.6602	-0.0203
1.6621	-0.0182
1.6641	-0.0165
1.666	-0.0112
1.668	-0.00543
1.6699	0.0019
1.6719	0.00827
1.6738	0.00777
1.6758	0.00888
1.6777	0.0159
1.6797	0.023
1.6816	0.0259
1.6836	0.0181
1.6855	0.00906
1.6875	0.0027
1.6895	-0.00214
1.6914	-0.00853
1.6934	-0.0187
1.6953	-0.0276
1.6973	-0.0292
1.6992	-0.0187
1.7012	-0.00432
1.7031	0.000577
1.7051	0.00532
1.707	0.00849
1.709	0.013
1.7109	0.0155
1.7129	0.0153
1.7148	0.0136
1.7168	0.0123
1.7188	0.011
1.7207	0.00885
1.7227	0.0028
1.7246	-0.00419
1.7266	-0.0116
1.7285	-0.0196
1.7305	-0.0275
1.7324	-0.0278
1.7344	-0.0163
1.7363	-0.00289
1.7383	0.0114
1.7402	0.0152
1.7422	0.0146
1.7441	0.016
1.7461	0.0218
1.748	0.0218
1.75	0.0139
1.752	0.00562
1.7539	0.00383
1.7559	0.00218
1.7578	-0.00566
1.7598	-0.019
1.7617	-0.0276
1.7637	-0.0296
1.7656	-0.0188
1.7676	-0.00912
1.7695	-0.00279
1.7715	0.00457
1.7734	0.0125
1.7754	0.0179
1.7773	0.0183
1.7793	0.0187
1.7813	0.0189
1.7832	0.0164
1.7852	0.00836
1.7871	0.00148
1.7891	-0.0023
1.791	-0.00503
1.793	-0.0142
1.7949	-0.0284
1.7969	-0.0314
1.7988	-0.0202
1.8008	-0.00424
1.8027	0.00521
1.8047	0.0103
1.8066	0.0141
1.8086	0.0199
1.8105	0.0235
1.8125	0.0207
1.8145	0.0134
1.8164	0.00679
1.8184	0.00325
1.8203	-0.00218
1.8223	-0.0119
1.8242	-0.0208
1.8262	-0.0251
1.8281	-0.0258
1.8301	-0.0176
1.832	-0.00836
1.834	0.00148
1.8359	0.0106
1.8379	0.0145
1.8398	0.0157
1.8418	0.0184
1.8438	0.0221
1.8457	0.0222
1.8477	0.014
1.8496	0.0064
1.8516	-0.000256
1.8535	-0.00429
1.8555	-0.0175
1.8574	-0.0352
1.8594	-0.0403
1.8613	-0.0232
1.8633	-0.00348
1.8652	0.00633
1.8672	0.0128
1.8691	0.0186
1.8711	0.0267
1.873	0.021
1.875	0.011
1.877	0.00369
1.8789	0.00726
1.8809	0.00713
1.8828	0.000577
1.8848	-0.00766
1.8867	-0.0132
1.8887	-0.0237
1.8906	-0.0337
1.8926	-0.028
1.8945	-0.0115
1.8965	0.0105
1.8984	0.0177
1.9004	0.0199
1.9023	0.0262
1.9043	0.0326
1.9063	0.0232
1.9082	0.00581
1.9102	-0.00411
1.9121	-0.00314
1.9141	-0.00469
1.916	-0.0181
1.918	-0.0319
1.9199	-0.0334
1.9219	-0.017
1.9238	-0.00854
1.9258	-0.00325
1.9277	0.00573
1.9297	0.0217
1.9316	0.0295
1.9336	0.0255
1.9355	0.0178
1.9375	0.0142
1.9395	0.00948
1.9414	-0.00158
1.9434	-0.0107
1.9453	-0.0122
1.9473	-0.017
1.9492	-0.0305
1.9512	-0.0321
1.9531	-0.0175
1.9551	0.00404
1.957	0.0121
1.959	0.0131
1.9609	0.0207
1.9629	0.0347
1.9648	0.0298
1.9668	0.011
1.9688	-0.00341
1.9707	-0.00201
1.9727	-0.00677
1.9746	-0.0217
1.9766	-0.0347
1.9785	-0.0319
1.9805	-0.0164
1.9824	-0.00745
1.9844	-0.00438
1.9863	0.00979
1.9883	0.023
1.9902	0.0283
1.9922	0.0224
1.9941	0.0194
1.9961	0.0181
1.998	0.0111
2	-0.00498
2.002	-0.0128
2.0039	-0.0149
2.0059	-0.0271
2.0078	-0.039
2.0098	-0.0304
2.0117	-0.00686
2.0137	0.0105
2.0156	0.0124
2.0176	0.0168
2.0195	0.0308
2.0215	0.0339
2.0234	0.016
2.0254	-0.00204
2.0273	-0.0014
2.0293	-0.000207
2.0313	-0.0129
2.0332	-0.0298
2.0352	-0.0342
2.0371	-0.0238
2.0391	-0.0132
2.041	-0.00865
2.043	0.00837
2.0449	0.0248
2.0469	0.0324
2.0488	0.0282
2.0508	0.0234
2.0527	0.0178
2.0547	0.00761
2.0566	-0.00926
2.0586	-0.0181
2.0605	-0.0219
2.0625	-0.0325
2.0645	-0.0368
2.0664	-0.0216
2.0684	-0.00186
2.0703	0.011
2.0723	0.0131
2.0742	0.0227
2.0762	0.0335
2.0781	0.031
2.0801	0.0135
2.082	0.00297
2.084	0.000414
2.0859	-0.00639
2.0879	-0.0215
2.0898	-0.0355
2.0918	-0.0351
2.0938	-0.021
2.0957	-0.00879
2.0977	0.00634
2.0996	0.02
2.1016	0.0303
2.1035	0.0335
2.1055	0.0268
2.1074	0.0153
2.1094	0.0049
2.1113	-0.00507
2.1133	-0.0154
2.1152	-0.0243
2.1172	-0.0335
2.1191	-0.0345
2.1211	-0.021
2.123	-0.00666
2.125	0.0064
2.127	0.0159
2.1289	0.0285
2.1309	0.0358
2.1328	0.0315
2.1348	0.0171
2.1367	0.00709
2.1387	-0.00245
2.1406	-0.0138
2.1426	-0.0264
2.1445	-0.0391
2.1465	-0.0363
2.1484	-0.0197
2.1504	-0.00156
2.1523	0.0127
2.1543	0.0227
2.1563	0.0313
2.1582	0.0341
2.1602	0.0231
2.1621	0.00766
2.1641	-0.000615
2.166	-0.0074
2.168	-0.0187
2.1699	-0.0309
2.1719	-0.0387
2.1738	-0.0279
2.1758	-0.0133
2.1777	0.00049
2.1797	0.0142
2.1816	0.0285
2.1836	0.0391
2.1855	0.0354
2.1875	0.0215
2.1895	0.00892
2.1914	-0.00216
2.1934	-0.0164
2.1953	-0.031
2.1973	-0.0427
2.1992	-0.0392
2.2012	-0.0202
2.2031	-0.00242
2.2051	0.0117
2.207	0.0236
2.209	0.0344
2.2109	0.0351
2.2129	0.0234
2.2148	0.00887
2.2168	0.00145
2.2188	-0.00768
2.2207	-0.0202
2.2227	-0.0349
2.2246	-0.0398
2.2266	-0.0287
2.2285	-0.0125
2.2305	0.00486
2.2324	0.0202
2.2344	0.0351
2.2363	0.0417
2.2383	0.033
2.2402	0.0155
2.2422	0.00102
2.2441	-0.0118
2.2461	-0.0284
2.248	-0.0411
2.25	-0.0447
2.252	-0.0282
2.2539	-0.00767
2.2559	0.00665
2.2578	0.0186
2.2598	0.0317
2.2617	0.0376
2.2637	0.0299
2.2656	0.0151
2.2676	0.00619
2.2695	-0.00162
2.2715	-0.0169
2.2734	-0.0358
2.2754	-0.0453
2.2773	-0.0361
2.2793	-0.0173
2.2813	0.000135
2.2832	0.019
2.2852	0.0379
2.2871	0.0461
2.2891	0.0338
2.291	0.0145
2.293	-0.000171
2.2949	-0.0125
2.2969	-0.0295
2.2988	-0.0431
2.3008	-0.0435
2.3027	-0.0235
2.3047	-0.00621
2.3066	0.00723
2.3086	0.0197
2.3105	0.0361
2.3125	0.042
2.3145	0.0291
2.3164	0.0144
2.3184	0.00669
2.3203	-0.00599
2.3223	-0.0272
2.3242	-0.0503
2.3262	-0.0502
2.3281	-0.0291
2.3301	-0.00823
2.332	0.00869
2.334	0.0297
2.3359	0.0487
2.3379	0.0471
2.3398	0.0239
2.3418	0.00394
2.3438	-0.00533
2.3457	-0.0185
2.3477	-0.0372
2.3496	-0.0485
2.3516	-0.0346
2.3535	-0.0121
2.3555	0.0025
2.3574	0.0146
2.3594	0.0329
2.3613	0.0475
2.3633	0.0385
2.3652	0.0174
2.3672	0.00492
2.3691	-0.00486
2.3711	-0.0268
2.373	-0.0516
2.375	-0.0559
2.377	-0.0306
2.3789	-0.007
2.3809	0.00875
2.3828	0.0283
2.3848	0.0494
2.3867	0.051
2.3887	0.0271
2.3906	0.00431
2.3926	-0.00471
2.3945	-0.0159
2.3965	-0.0383
2.3984	-0.0533
2.4004	-0.0387
2.4023	-0.0126
2.4043	0.00335
2.4063	0.0155
2.4082	0.0371
2.4102	0.0516
2.4121	0.0376
2.4141	0.0111
2.416	-0.00121
2.418	-0.0117
2.4199	-0.034
2.4219	-0.0565
2.4238	-0.051
2.4258	-0.0194
2.4277	0.00284
2.4297	0.0162
2.4316	0.0346
2.4336	0.0557
2.4355	0.0482
2.4375	0.0194
2.4395	-0.00132
2.4414	-0.00984
2.4434	-0.0265
2.4453	-0.0538
2.4473	-0.0583
2.4492	-0.0293
2.4512	-0.000386
2.4531	0.0137
2.4551	0.03
2.457	0.0514
2.459	0.0511
2.4609	0.0233
2.4629	-0.00135
2.4648	-0.0133
2.4668	-0.0258
2.4688	-0.0494
2.4707	-0.0569
2.4727	-0.032
2.4746	-5.01e-05
2.4766	0.0173
2.4785	0.0297
2.4805	0.0512
2.4824	0.0533
2.4844	0.0283
2.4863	0.000971
2.4883	-0.0136
2.4902	-0.0297
2.4922	-0.0544
2.4941	-0.0617
2.4961	-0.0348
2.498	-0.00089
2.5	0.0192
2.502	0.034
2.5039	0.0521
2.5059	0.0517
2.5078	0.0264
2.5098	0.000269
2.5117	-0.0151
2.5137	-0.0278
2.5156	-0.05
2.5176	-0.0561
2.5195	-0.0316
2.5215	-0.000561
2.5234	0.0179
2.5254	0.0342
2.5273	0.0518
2.5293	0.0499
2.5313	0.0247
2.5332	-0.000509
2.5352	-0.0189
2.5371	-0.0377
2.5391	-0.0585
2.541	-0.0569
2.543	-0.027
2.5449	0.00523
2.5469	0.026
2.5488	0.044
2.5508	0.0582
2.5527	0.0471
2.5547	0.0193
2.5566	-0.00514
2.5586	-0.0218
2.5605	-0.0424
2.5625	-0.0617
2.5645	-0.0512
2.5664	-0.0195
2.5684	0.00935
2.5703	0.0291
2.5723	0.0486
2.5742	0.0568
2.5762	0.0378
2.5781	0.0108
2.5801	-0.0106
2.582	-0.0296
2.584	-0.0511
2.5859	-0.0617
2.5879	-0.0401
2.5898	-0.00684
2.5918	0.0184
2.5938	0.0366
2.5957	0.0576
2.5977	0.0552
2.5996	0.0299
2.6016	0.00192
2.6035	-0.0176
2.6055	-0.0396
2.6074	-0.0636
2.6094	-0.0617
2.6113	-0.0286
2.6133	0.00486
2.6152	0.0275
2.6172	0.0475
2.6191	0.0607
2.6211	0.0468
2.623	0.0164
2.625	-0.00867
2.627	-0.0258
2.6289	-0.0466
2.6309	-0.0628
2.6328	-0.0472
2.6348	-0.0128
2.6367	0.0155
2.6387	0.0343
2.6406	0.0549
2.6426	0.0569
2.6445	0.0333
2.6465	0.00506
2.6484	-0.0177
2.6504	-0.042
2.6523	-0.0634
2.6543	-0.0627
2.6563	-0.0306
2.6582	0.00283
2.6602	0.0293
2.6621	0.051
2.6641	0.0648
2.666	0.0481
2.668	0.0188
2.6699	-0.00727
2.6719	-0.0289
2.6738	-0.056
2.6758	-0.0695
2.6777	-0.0478
2.6797	-0.0104
2.6816	0.018
2.6836	0.0427
2.6855	0.0639
2.6875	0.0592
2.6895	0.0285
2.6914	-0.0006
2.6934	-0.0258
2.6953	-0.0496
2.6973	-0.0702
2.6992	-0.0578
2.7012	-0.0204
2.7031	0.0152
2.7051	0.0381
2.707	0.0612
2.709	0.0659
2.7109	0.0399
2.7129	0.00612
2.7148	-0.0194
2.7168	-0.0446
2.7188	-0.0703
2.7207	-0.0681
2.7227	-0.0334
2.7246	0.00544
2.7266	0.0341
2.7285	0.0569
2.7305	0.0671
2.7324	0.0482
2.7344	0.015
2.7363	-0.0139
2.7383	-0.0371
2.7402	-0.0619
2.7422	-0.0676
2.7441	-0.041
2.7461	-0.00244
2.748	0.0267
2.75	0.0527
2.752	0.0695
2.7539	0.054
2.7559	0.0206
2.7578	-0.00754
2.7598	-0.036
2.7617	-0.0652
2.7637	-0.0772
2.7656	-0.049
2.7676	-0.00882
2.7695	0.0249
2.7715	0.0531
2.7734	0.0739
2.7754	0.0634
2.7773	0.0283
2.7793	-0.0052
2.7813	-0.033
2.7832	-0.0627
2.7852	-0.0797
2.7871	-0.0559
2.7891	-0.0133
2.791	0.0236
2.793	0.053
2.7949	0.0746
2.7969	0.0637
2.7988	0.0294
2.8008	-0.00558
2.8027	-0.0373
2.8047	-0.0664
2.8066	-0.0803
2.8086	-0.0541
2.8105	-0.0106
2.8125	0.0271
2.8145	0.0563
2.8164	0.0793
2.8184	0.0659
2.8203	0.0287
2.8223	-0.0085
2.8242	-0.0387
2.8262	-0.0725
2.8281	-0.0841
2.8301	-0.0549
2.832	-0.00926
2.834	0.0299
2.8359	0.0627
2.8379	0.0796
2.8398	0.0631
2.8418	0.0247
2.8438	-0.0113
2.8457	-0.0439
2.8477	-0.0736
2.8496	-0.0799
2.8516	-0.0472
2.8535	-0.00203
2.8555	0.0338
2.8574	0.066
2.8594	0.0823
2.8613	0.0572
2.8633	0.0172
2.8652	-0.0178
2.8672	-0.0528
2.8691	-0.0837
2.8711	-0.0814
2.873	-0.0401
2.875	0.00677
2.877	0.0442
2.8789	0.0747
2.8809	0.0838
2.8828	0.0542
2.8848	0.0123
2.8867	-0.0261
2.8887	-0.0611
2.8906	-0.0884
2.8926	-0.0758
2.8945	-0.0306
2.8965	0.0153
2.8984	0.0548
2.9004	0.0859
2.9023	0.0788
2.9043	0.0404
2.9063	-0.000894
2.9082	-0.0418
2.9102	-0.0797
2.9121	-0.0949
2.9141	-0.0619
2.916	-0.00942
2.918	0.0359
2.9199	0.072
2.9219	0.0938
2.9238	0.0712
2.9258	0.0255
2.9277	-0.0206
2.9297	-0.0598
2.9316	-0.0953
2.9336	-0.0896
2.9355	-0.0438
2.9375	0.00902
2.9395	0.0551
2.9414	0.0894
2.9434	0.0881
2.9453	0.0503
2.9473	0.00337
2.9492	-0.0396
2.9512	-0.0795
2.9531	-0.099
2.9551	-0.0691
2.957	-0.0137
2.959	0.0344
2.9609	0.0737
2.9629	0.0974
2.9648	0.0745
2.9668	0.0257
2.9688	-0.0215
2.9707	-0.0657
2.9727	-0.101
2.9746	-0.0926
2.9766	-0.0431
2.9785	0.0132
2.9805	0.0614
2.9824	0.0958
2.9844	0.0931
2.9863	0.0511
2.9883	0.0012
2.9902	-0.0468
2.9922	-0.0908
2.9941	-0.106
2.9961	-0.0678
2.998	-0.00895
3	0.0431
3.002	0.0885
3.0039	0.106
3.0059	0.0705
3.0078	0.0188
3.0098	-0.0352
3.0117	-0.0844
3.0137	-0.114
3.0156	-0.0896
3.0176	-0.0275
3.0195	0.0339
3.0215	0.0832
3.0234	0.113
3.0254	0.091
3.0273	0.0371
3.0293	-0.0222
3.0313	-0.0755
3.0332	-0.118
3.0352	-0.106
3.0371	-0.0467
3.0391	0.0185
3.041	0.0758
3.043	0.115
3.0449	0.102
3.0469	0.0495
3.0488	-0.0121
3.0508	-0.0685
3.0527	-0.115
3.0547	-0.115
3.0566	-0.0586
3.0586	0.012
3.0605	0.07
3.0625	0.115
3.0645	0.112
3.0664	0.0604
3.0684	-0.00326
3.0703	-0.0652
3.0723	-0.119
3.0742	-0.125
3.0762	-0.0712
3.0781	0.00105
3.0801	0.0677
3.082	0.118
3.084	0.12
3.0859	0.072
3.0879	0.00524
3.0898	-0.0605
3.0918	-0.118
3.0938	-0.132
3.0957	-0.0799
3.0977	-0.00338
3.0996	0.0654
3.1016	0.123
3.1035	0.128
3.1055	0.0756
3.1074	0.00663
3.1094	-0.0669
3.1113	-0.129
3.1133	-0.141
3.1152	-0.0843
3.1172	-0.000352
3.1191	0.0762
3.1211	0.134
3.123	0.138
3.125	0.0803
3.127	0.00209
3.1289	-0.0755
3.1309	-0.141
3.1328	-0.148
3.1348	-0.0821
3.1367	0.00522
3.1387	0.0872
3.1406	0.145
3.1426	0.138
3.1445	0.0739
3.1465	-0.00941
3.1484	-0.0906
3.1504	-0.15
3.1523	-0.146
3.1543	-0.071
3.1563	0.022
3.1582	0.103
3.1602	0.155
3.1621	0.136
3.1641	0.0625
3.166	-0.0245
3.168	-0.11
3.1699	-0.166
3.1719	-0.142
3.1738	-0.058
3.1758	0.0384
3.1777	0.123
3.1797	0.164
3.1816	0.132
3.1836	0.0495
3.1855	-0.0433
3.1875	-0.13
3.1895	-0.174
3.1914	-0.133
3.1934	-0.0371
3.1953	0.0613
3.1973	0.145
3.1992	0.172
3.2012	0.118
3.2031	0.0275
3.2051	-0.0739
3.207	-0.161
3.209	-0.182
3.2109	-0.115
3.2129	-0.00803
3.2148	0.0987
3.2168	0.175
3.2188	0.175
3.2207	0.1
3.2227	-0.0051
3.2246	-0.113
3.2266	-0.193
3.2285	-0.18
3.2305	-0.0854
3.2324	0.0309
3.2344	0.141
3.2363	0.197
3.2383	0.162
3.2402	0.0663
3.2422	-0.0529
3.2441	-0.162
3.2461	-0.211
3.248	-0.155
3.25	-0.0371
3.252	0.0876
3.2539	0.187
3.2559	0.206
3.2578	0.132
3.2598	0.0145
3.2617	-0.114
3.2637	-0.213
3.2656	-0.21
3.2676	-0.111
3.2695	0.023
3.2715	0.151
3.2734	0.22
3.2754	0.189
3.2773	0.0838
3.2793	-0.0495
3.2813	-0.178
3.2832	-0.235
3.2852	-0.176
3.2871	-0.0446
3.2891	0.0957
3.291	0.21
3.293	0.226
3.2949	0.145
3.2969	0.0134
3.2988	-0.135
3.3008	-0.239
3.3027	-0.226
3.3047	-0.112
3.3066	0.0396
3.3086	0.181
3.3105	0.248
3.3125	0.2
3.3145	0.0761
3.3164	-0.0794
3.3184	-0.221
3.3203	-0.262
3.3223	-0.172
3.3242	-0.0223
3.3262	0.141
3.3281	0.248
3.3301	0.239
3.332	0.133
3.334	-0.0261
3.3359	-0.189
3.3379	-0.275
3.3398	-0.221
3.3418	-0.0747
3.3438	0.0982
3.3457	0.239
3.3477	0.269
3.3496	0.18
3.3516	0.025
3.3535	-0.157
3.3555	-0.282
3.3574	-0.261
3.3594	-0.127
3.3613	0.0561
3.3633	0.221
3.3652	0.286
3.3672	0.222
3.3691	0.0729
3.3711	-0.12
3.373	-0.274
3.375	-0.291
3.377	-0.168
3.3789	0.016
3.3809	0.203
3.3828	0.299
3.3848	0.254
3.3867	0.111
3.3887	-0.091
3.3906	-0.272
3.3926	-0.317
3.3945	-0.207
3.3965	-0.0141
3.3984	0.191
3.4004	0.311
3.4023	0.286
3.4043	0.144
3.4063	-0.0657
3.4082	-0.269
3.4102	-0.34
3.4121	-0.239
3.4141	-0.0414
3.416	0.183
3.418	0.322
3.4199	0.309
3.4219	0.17
3.4238	-0.0502
3.4258	-0.27
3.4277	-0.359
3.4297	-0.264
3.4316	-0.056
3.4336	0.184
3.4355	0.34
3.4375	0.333
3.4395	0.189
3.4414	-0.0414
3.4434	-0.285
3.4453	-0.383
3.4473	-0.289
3.4492	-0.0658
3.4512	0.192
3.4531	0.358
3.4551	0.354
3.457	0.205
3.459	-0.0426
3.4609	-0.297
3.4629	-0.405
3.4648	-0.303
3.4668	-0.0659
3.4688	0.211
3.4707	0.385
3.4727	0.372
3.4746	0.21
3.4766	-0.0575
3.4785	-0.326
3.4805	-0.428
3.4824	-0.314
3.4844	-0.0522
3.4863	0.243
3.4883	0.415
3.4902	0.389
3.4922	0.205
3.4941	-0.0818
3.4961	-0.36
3.498	-0.449
3.5	-0.316
3.502	-0.0298
3.5039	0.284
3.5059	0.444
3.5078	0.399
3.5098	0.187
3.5117	-0.12
3.5137	-0.396
3.5156	-0.465
3.5176	-0.305
3.5195	0.0126
3.5215	0.336
3.5234	0.478
3.5254	0.399
3.5273	0.157
3.5293	-0.178
3.5313	-0.444
3.5332	-0.48
3.5352	-0.285
3.5371	0.0702
3.5391	0.392
3.541	0.506
3.543	0.393
3.5449	0.114
3.5469	-0.235
3.5488	-0.486
3.5508	-0.486
3.5527	-0.251
3.5547	0.138
3.5566	0.454
3.5586	0.528
3.5605	0.378
3.5625	0.057
3.5645	-0.309
3.5664	-0.531
3.5684	-0.488
3.5703	-0.197
3.5723	0.225
3.5742	0.519
3.5762	0.549
3.5781	0.347
3.5801	-0.0156
3.582	-0.39
3.584	-0.574
3.5859	-0.481
3.5879	-0.126
3.5898	0.319
3.5918	0.576
3.5938	0.557
3.5957	0.3
3.5977	-0.101
3.5996	-0.466
3.6016	-0.608
3.6035	-0.453
3.6055	-0.0317
3.6074	0.418
3.6094	0.63
3.6113	0.548
3.6133	0.228
3.6152	-0.206
3.6172	-0.543
3.6191	-0.633
3.6211	-0.389
3.623	0.0899
3.625	0.522
3.627	0.668
3.6289	0.509
3.6309	0.122
3.6328	-0.321
3.6348	-0.616
3.6367	-0.627
3.6387	-0.292
3.6406	0.229
3.6426	0.616
3.6445	0.684
3.6465	0.434
3.6484	-0.00642
3.6504	-0.437
3.6523	-0.676
3.6543	-0.587
3.6563	-0.153
3.6582	0.378
3.6602	0.701
3.6621	0.661
3.6641	0.319
3.666	-0.16
3.668	-0.552
3.6699	-0.71
3.6719	-0.494
3.6738	0.0157
3.6758	0.527
3.6777	0.752
3.6797	0.59
3.6816	0.166
3.6836	-0.315
3.6855	-0.653
3.6875	-0.697
3.6895	-0.356
3.6914	0.201
3.6934	0.656
3.6953	0.758
3.6973	0.474
3.6992	-0.00425
3.7012	-0.465
3.7031	-0.725
3.7051	-0.627
3.707	-0.177
3.709	0.391
3.7109	0.753
3.7129	0.698
3.7148	0.309
3.7168	-0.194
3.7188	-0.601
3.7207	-0.739
3.7227	-0.489
3.7246	0.035
3.7266	0.567
3.7285	0.781
3.7305	0.569
3.7324	0.108
3.7344	-0.384
3.7363	-0.697
3.7383	-0.674
3.7402	-0.299
3.7422	0.259
3.7441	0.696
3.7461	0.731
3.748	0.388
3.75	-0.11
3.752	-0.552
3.7539	-0.719
3.7559	-0.531
3.7578	-0.0621
3.7598	0.474
3.7617	0.741
3.7637	0.594
3.7656	0.161
3.7676	-0.331
3.7695	-0.655
3.7715	-0.648
3.7734	-0.328
3.7754	0.188
3.7773	0.619
3.7793	0.688
3.7813	0.395
3.7832	-0.0818
3.7852	-0.512
3.7871	-0.662
3.7891	-0.5
3.791	-0.0772
3.793	0.407
3.7949	0.66
3.7969	0.545
3.7988	0.158
3.8008	-0.31
3.8027	-0.596
3.8047	-0.574
3.8066	-0.285
3.8086	0.177
3.8105	0.531
3.8125	0.587
3.8145	0.334
3.8164	-0.0951
3.8184	-0.461
3.8203	-0.568
3.8223	-0.407
3.8242	-0.0264
3.8262	0.364
3.8281	0.538
3.8301	0.426
3.832	0.0894
3.834	-0.296
3.8359	-0.491
3.8379	-0.451
3.8398	-0.173
3.8418	0.191
3.8438	0.427
3.8457	0.43
3.8477	0.208
3.8496	-0.132
3.8516	-0.37
3.8535	-0.416
3.8555	-0.249
3.8574	0.056
3.8594	0.299
3.8613	0.367
3.8633	0.245
3.8652	-0.02
3.8672	-0.244
3.8691	-0.334
3.8711	-0.249
3.873	-0.0254
3.875	0.192
3.877	0.28
3.8789	0.223
3.8809	0.0308
3.8828	-0.152
3.8848	-0.233
3.8867	-0.2
3.8887	-0.0431
3.8906	0.114
3.8926	0.192
3.8945	0.164
3.8965	0.025
3.8984	-0.108
3.9004	-0.154
3.9023	-0.119
[truncated: 2,098 more rows]
