# Supplementary material for: Effect of the Supports’ Positions on the Vibration Characteristics of a Flexible Rotor Shafting
Source: Hindawi journal article supplement (doi:10.1155/2020/1592794), 2020-02-12
Supplement: f1 [file 1592794.f1.zip › 1592794.f1/test_data/Table11_13.xlsx]

## Sheet: Sheet1
Time t/s	vibration deformation amount u/mm
0	0.000498
0.002	0.00118
0.0039	0.000849
0.0059	0.00104
0.0078	0.00124
0.0098	0.000889
0.0117	0.000988
0.0137	0.000935
0.0156	0.000794
0.0176	0.00126
0.0195	0.00102
0.0215	0.00135
0.0234	0.00179
0.0254	0.00176
0.0273	0.00167
0.0293	0.00154
0.0313	0.00206
0.0332	0.00242
0.0352	0.00238
0.0371	0.00286
0.0391	0.00283
0.041	0.00322
0.043	0.00284
0.0449	0.00225
0.0469	0.00241
0.0488	0.002
0.0508	0.00225
0.0527	0.00232
0.0547	0.00274
0.0566	0.00339
0.0586	0.0041
0.0605	0.00482
0.0625	0.00494
0.0645	0.00543
0.0664	0.00542
0.0684	0.00512
0.0703	0.00557
0.0723	0.00578
0.0742	0.00609
0.0762	0.00631
0.0781	0.00776
0.0801	0.0078
0.082	0.00795
0.084	0.00786
0.0859	0.00785
0.0879	0.00818
0.0898	0.00823
0.0918	0.00885
0.0938	0.00971
0.0957	0.0103
0.0977	0.0105
0.0996	0.0109
0.1016	0.0105
0.1035	0.01
0.1055	0.00999
0.1074	0.0104
0.1094	0.0107
0.1113	0.0111
0.1133	0.0112
0.1152	0.0112
0.1172	0.0107
0.1191	0.00972
0.1211	0.00887
0.123	0.00759
0.125	0.00831
0.127	0.01
0.1289	0.0125
0.1309	0.0143
0.1328	0.0144
0.1348	0.0121
0.1367	0.00902
0.1387	0.00576
0.1406	0.00447
0.1426	0.00467
0.1445	0.00679
0.1465	0.00893
0.1484	0.00982
0.1504	0.00904
0.1523	0.00667
0.1543	0.00349
0.1563	0.00137
0.1582	0.000881
0.1602	0.00248
0.1621	0.00513
0.1641	0.0079
0.166	0.00972
0.168	0.00993
0.1699	0.00829
0.1719	0.00662
0.1738	0.00608
0.1758	0.00741
0.1777	0.01
0.1797	0.0135
0.1816	0.0171
0.1836	0.0195
0.1855	0.0208
0.1875	0.0211
0.1895	0.0221
0.1914	0.0234
0.1934	0.025
0.1953	0.0265
0.1973	0.0279
0.1992	0.0298
0.2012	0.0305
0.2031	0.0307
0.2051	0.0308
0.207	0.0317
0.209	0.0316
0.2109	0.0322
0.2129	0.0321
0.2148	0.0307
0.2168	0.0271
0.2188	0.0218
0.2207	0.0157
0.2227	0.0123
0.2246	0.0111
0.2266	0.0125
0.2285	0.0147
0.2305	0.016
0.2324	0.0173
0.2344	0.0161
0.2363	0.0151
0.2383	0.0137
0.2402	0.0147
0.2422	0.0158
0.2441	0.0191
0.2461	0.0225
0.248	0.0261
0.25	0.0277
0.252	0.0278
0.2539	0.0264
0.2559	0.0266
0.2578	0.0259
0.2598	0.0253
0.2617	0.0224
0.2637	0.018
0.2656	0.0113
0.2676	0.00307
0.2695	-0.00592
0.2715	-0.0125
0.2734	-0.0148
0.2754	-0.0144
0.2773	-0.0118
0.2793	-0.00934
0.2813	-0.00739
0.2832	-0.00717
0.2852	-0.00739
0.2871	-0.00643
0.2891	-0.00329
0.291	0.0027
0.293	0.0102
0.2949	0.0165
0.2969	0.0196
0.2988	0.016
0.3008	0.00694
0.3027	-0.00337
0.3047	-0.00987
0.3066	-0.0113
0.3086	-0.00722
0.3105	-0.000801
0.3125	0.00628
0.3145	0.0106
0.3164	0.0111
0.3184	0.00828
0.3203	0.00544
0.3223	0.00795
0.3242	0.0146
0.3262	0.0242
0.3281	0.032
0.3301	0.0368
0.332	0.0344
0.334	0.0267
0.3359	0.0176
0.3379	0.011
0.3398	0.0102
0.3418	0.0141
0.3438	0.0219
0.3457	0.0296
0.3477	0.0345
0.3496	0.0318
0.3516	0.0236
0.3535	0.0141
0.3555	0.0108
0.3574	0.0122
0.3594	0.0169
0.3613	0.021
0.3633	0.0231
0.3652	0.0215
0.3672	0.0154
0.3691	0.00586
0.3711	-0.0024
0.373	-0.00707
0.375	-0.00861
0.377	-0.00894
0.3789	-0.00973
0.3809	-0.0116
0.3828	-0.0119
0.3848	-0.0124
0.3867	-0.00973
0.3887	-0.0034
0.3906	0.00806
0.3926	0.0164
0.3945	0.0201
0.3965	0.0174
0.3984	0.0104
0.4004	-0.00183
0.4023	-0.0127
0.4043	-0.0168
0.4063	-0.0109
0.4082	0.00141
0.4102	0.0158
0.4121	0.0284
0.4141	0.0356
0.416	0.0352
0.418	0.0293
0.4199	0.0228
0.4219	0.02
0.4238	0.0167
0.4258	0.0131
0.4277	0.0084
0.4297	0.00592
0.4316	0.00863
0.4336	0.0128
0.4355	0.0167
0.4375	0.0232
0.4395	0.0301
0.4414	0.0344
0.4434	0.0298
0.4453	0.0189
0.4473	0.0035
0.4492	-0.0117
0.4512	-0.0247
0.4531	-0.0275
0.4551	-0.0201
0.457	-0.00729
0.459	0.00378
0.4609	0.011
0.4629	0.0117
0.4648	0.00833
0.4668	0.000894
0.4688	-0.00738
0.4707	-0.0122
0.4727	-0.00828
0.4746	-0.000131
0.4766	0.00948
0.4785	0.016
0.4805	0.0184
0.4824	0.016
0.4844	0.0137
0.4863	0.0126
0.4883	0.015
0.4902	0.0206
0.4922	0.0284
0.4941	0.0323
0.4961	0.0314
0.498	0.0283
0.5	0.0227
0.502	0.0145
0.5039	0.00528
0.5059	0.00209
0.5078	0.00487
0.5098	0.0129
0.5117	0.0181
0.5137	0.0214
0.5156	0.0216
0.5176	0.0154
0.5195	0.00161
0.5215	-0.0163
0.5234	-0.0298
0.5254	-0.0365
0.5273	-0.0304
0.5293	-0.0168
0.5313	0.002
0.5332	0.0216
0.5352	0.0341
0.5371	0.0322
0.5391	0.0155
0.541	-0.0104
0.543	-0.0312
0.5449	-0.0357
0.5469	-0.0225
0.5488	0.00493
0.5508	0.036
0.5527	0.0574
0.5547	0.0618
0.5566	0.0484
0.5586	0.0223
0.5605	-0.00742
0.5625	-0.0233
0.5645	-0.02
0.5664	0.0014
0.5684	0.0288
0.5703	0.0517
0.5723	0.0601
0.5742	0.0487
0.5762	0.0198
0.5781	-0.0129
0.5801	-0.0385
0.582	-0.0465
0.584	-0.033
0.5859	-0.00642
0.5879	0.0194
0.5898	0.0311
0.5918	0.0255
0.5938	0.00355
0.5957	-0.0197
0.5977	-0.0339
0.5996	-0.0281
0.6016	-0.00864
0.6035	0.0166
0.6055	0.0352
0.6074	0.039
0.6094	0.0283
0.6113	0.0124
0.6133	-0.0029
0.6152	-0.00442
0.6172	0.00779
0.6191	0.0286
0.6211	0.0443
0.623	0.0459
0.625	0.0301
0.627	0.00546
0.6289	-0.0139
0.6309	-0.0183
0.6328	-0.00696
0.6348	0.014
0.6367	0.0338
0.6387	0.0383
0.6406	0.0184
0.6426	-0.0143
0.6445	-0.0462
0.6465	-0.0588
0.6484	-0.0457
0.6504	-0.0145
0.6523	0.0242
0.6543	0.051
0.6563	0.0515
0.6582	0.0222
0.6602	-0.0197
0.6621	-0.0473
0.6641	-0.0462
0.666	-0.0183
0.668	0.0259
0.6699	0.0633
0.6719	0.0805
0.6738	0.0663
0.6758	0.0268
0.6777	-0.0154
0.6797	-0.0343
0.6816	-0.0237
0.6836	0.00599
0.6855	0.0394
0.6875	0.0601
0.6895	0.0567
0.6914	0.0273
0.6934	-0.0151
0.6953	-0.0497
0.6973	-0.0553
0.6992	-0.0352
0.7012	-0.00522
0.7031	0.0183
0.7051	0.0275
0.707	0.0211
0.709	0.000919
0.7109	-0.0174
0.7129	-0.0238
0.7148	-0.0143
0.7168	0.00314
0.7188	0.0176
0.7207	0.0271
0.7227	0.0305
0.7246	0.0249
0.7266	0.0182
0.7285	0.015
0.7305	0.0161
0.7324	0.018
0.7344	0.0141
0.7363	0.00926
0.7383	0.00702
0.7402	0.00977
0.7422	0.0123
0.7441	0.0134
0.7461	0.0131
0.748	0.00347
0.75	-0.0118
0.752	-0.0271
0.7539	-0.0334
0.7559	-0.0256
0.7578	-0.00979
0.7598	0.00762
0.7617	0.0197
0.7637	0.0216
0.7656	0.0123
0.7676	-0.00282
0.7695	-0.0113
0.7715	-0.00963
0.7734	0.00537
0.7754	0.0218
0.7773	0.0346
0.7793	0.0415
0.7813	0.0384
0.7832	0.0293
0.7852	0.016
0.7871	0.0053
0.7891	-0.00112
0.791	-0.00168
0.793	0.000784
0.7949	0.0057
0.7969	0.012
0.7988	0.0124
0.8008	0.0034
0.8027	-0.00832
0.8047	-0.026
0.8066	-0.0361
0.8086	-0.0353
0.8105	-0.0168
0.8125	0.0087
0.8145	0.031
0.8164	0.0351
0.8184	0.0217
0.8203	-0.00156
0.8223	-0.0202
0.8242	-0.021
0.8262	-0.00503
0.8281	0.0208
0.8301	0.0479
0.832	0.0573
0.834	0.046
0.8359	0.0184
0.8379	-0.00895
0.8398	-0.0202
0.8418	-0.0125
0.8438	0.00569
0.8457	0.0228
0.8477	0.0259
0.8496	0.0112
0.8516	-0.011
0.8535	-0.0307
0.8555	-0.0374
0.8574	-0.0272
0.8594	-0.00896
0.8613	0.00954
0.8633	0.0203
0.8652	0.0219
0.8672	0.0144
0.8691	0.00311
0.8711	-0.00614
0.873	-0.00249
0.875	0.00847
0.877	0.025
0.8789	0.0385
0.8809	0.0442
0.8828	0.038
0.8848	0.0191
0.8867	-0.00557
0.8887	-0.0191
0.8906	-0.0174
0.8926	-0.0016
0.8945	0.0181
0.8965	0.0262
0.8984	0.0178
0.9004	-0.00682
0.9023	-0.0381
0.9043	-0.0557
0.9063	-0.0461
0.9082	-0.0123
0.9102	0.0252
0.9121	0.0464
0.9141	0.0411
0.916	0.0166
0.918	-0.0144
0.9199	-0.0311
0.9219	-0.0239
0.9238	0.00491
0.9258	0.0411
0.9277	0.0642
0.9297	0.064
0.9316	0.0418
0.9336	0.00894
0.9355	-0.0198
0.9375	-0.0297
0.9395	-0.0219
0.9414	-0.000564
0.9434	0.0177
0.9453	0.0242
0.9473	0.0175
0.9492	-0.00461
0.9512	-0.031
0.9531	-0.047
0.9551	-0.0428
0.957	-0.0166
0.959	0.0177
0.9609	0.0437
0.9629	0.0491
0.9648	0.031
0.9668	0.00372
0.9688	-0.0191
0.9707	-0.0221
0.9727	-0.00146
0.9746	0.0299
0.9766	0.0534
0.9785	0.0532
0.9805	0.0299
0.9824	-0.000548
0.9844	-0.0221
0.9863	-0.0291
0.9883	-0.0199
0.9902	-0.00599
0.9922	0.00641
0.9941	0.00723
0.9961	-0.00318
0.998	-0.0146
1	-0.021
1.002	-0.0183
1.0039	-0.0101
1.0059	0.00219
1.0078	0.0166
1.0098	0.0261
1.0117	0.0283
1.0137	0.0237
1.0156	0.0143
1.0176	0.01
1.0195	0.0103
1.0215	0.0193
1.0234	0.0284
1.0254	0.0314
1.0273	0.0228
1.0293	0.00663
1.0313	-0.0124
1.0332	-0.0221
1.0352	-0.0238
1.0371	-0.0148
1.0391	-0.00665
1.041	-0.00412
1.043	-0.00662
1.0449	-0.00894
1.0469	-0.00667
1.0488	-0.000895
1.0508	0.00406
1.0527	0.00809
1.0547	0.00915
1.0566	0.0113
1.0586	0.0154
1.0605	0.0208
1.0625	0.0262
1.0645	0.0254
1.0664	0.0217
1.0684	0.0111
1.0703	0.00394
1.0723	0.00354
1.0742	0.00573
1.0762	0.00654
1.0781	-0.00297
1.0801	-0.0134
1.082	-0.0208
1.084	-0.0216
1.0859	-0.017
1.0879	-0.00888
1.0898	-0.000752
1.0918	0.00448
1.0938	0.00851
1.0957	0.0117
1.0977	0.0119
1.0996	0.0129
1.1016	0.0125
1.1035	0.0147
1.1055	0.0208
1.1074	0.0279
1.1094	0.0324
1.1113	0.0259
1.1133	0.0109
1.1152	-0.00577
1.1172	-0.0168
1.1191	-0.0156
1.1211	-0.0104
1.123	-0.00349
1.125	-0.00295
1.127	-0.0117
1.1289	-0.0208
1.1309	-0.0196
1.1328	-0.0106
1.1348	0.00108
1.1367	0.00949
1.1387	0.0136
1.1406	0.0142
1.1426	0.0164
1.1445	0.0157
1.1465	0.0182
1.1484	0.0205
1.1504	0.0224
1.1523	0.0243
1.1543	0.0213
1.1563	0.0173
1.1582	0.00902
1.1602	-0.00304
1.1621	-0.0171
1.1641	-0.0259
1.166	-0.0214
1.168	-0.0121
1.1699	-0.00542
1.1719	-0.00361
1.1738	-0.00384
1.1758	-0.00304
1.1777	0.00129
1.1797	0.00732
1.1816	0.0113
1.1836	0.015
1.1855	0.0163
1.1875	0.0203
1.1895	0.0242
1.1914	0.0268
1.1934	0.0236
1.1953	0.0116
1.1973	-0.00136
1.1992	-0.00794
1.2012	-0.00713
1.2031	-0.00573
1.2051	-0.00811
1.207	-0.0119
1.209	-0.0188
1.2109	-0.0203
1.2129	-0.0167
1.2148	-0.00702
1.2168	0.00196
1.2188	0.00862
1.2207	0.0137
1.2227	0.0168
1.2246	0.0194
1.2266	0.0195
1.2285	0.0187
1.2305	0.0179
1.2324	0.0227
1.2344	0.0266
1.2363	0.0246
1.2383	0.0138
1.2402	-0.00483
1.2422	-0.0199
1.2441	-0.0278
1.2461	-0.0238
1.248	-0.0151
1.25	-0.00864
1.252	-0.00534
1.2539	-0.00239
1.2559	0.000757
1.2578	0.00366
1.2598	0.00626
1.2617	0.00652
1.2637	0.00838
1.2656	0.0126
1.2676	0.0213
1.2695	0.0286
1.2715	0.0297
1.2734	0.0228
1.2754	0.00988
1.2773	0.000923
1.2793	-0.00607
1.2813	-0.00887
1.2832	-0.0158
1.2852	-0.0174
1.2871	-0.0165
1.2891	-0.0114
1.291	-0.0072
1.293	-0.00357
1.2949	-0.00498
1.2969	-0.00132
1.2988	0.0067
1.3008	0.017
1.3027	0.0233
1.3047	0.0233
1.3066	0.0221
1.3086	0.0233
1.3105	0.0246
1.3125	0.0208
1.3145	0.0117
1.3164	-0.00222
1.3184	-0.014
1.3203	-0.0197
1.3223	-0.019
1.3242	-0.0138
1.3262	-0.0145
1.3281	-0.0156
1.3301	-0.012
1.332	-0.00235
1.334	0.00459
1.3359	0.00863
1.3379	0.009
1.3398	0.0128
1.3418	0.0157
1.3438	0.0205
1.3457	0.0232
1.3477	0.026
1.3496	0.0261
1.3516	0.0219
1.3535	0.0119
1.3555	-0.00247
1.3574	-0.0201
1.3594	-0.0324
1.3613	-0.0286
1.3633	-0.0177
1.3652	-0.00441
1.3672	0.00259
1.3691	0.00253
1.3711	0.000368
1.373	0.00395
1.375	0.00903
1.377	0.0127
1.3789	0.0149
1.3809	0.0201
1.3828	0.0276
1.3848	0.0317
1.3867	0.0248
1.3887	0.00951
1.3906	-0.00699
1.3926	-0.0177
1.3945	-0.0233
1.3965	-0.0224
1.3984	-0.0176
1.4004	-0.0143
1.4023	-0.00997
1.4043	-0.00348
1.4063	0.0021
1.4082	0.00268
1.4102	0.0039
1.4121	0.00905
1.4141	0.0184
1.416	0.0248
1.418	0.0262
1.4199	0.0251
1.4219	0.0269
1.4238	0.0243
1.4258	0.0141
1.4277	-0.0063
1.4297	-0.0256
1.4316	-0.0349
1.4336	-0.0273
1.4355	-0.0165
1.4375	-0.00845
1.4395	-0.00226
1.4414	0.004
1.4434	0.00682
1.4453	0.00991
1.4473	0.00859
1.4492	0.00859
1.4512	0.0106
1.4531	0.0187
1.4551	0.0266
1.457	0.03
1.459	0.0229
1.4609	0.0108
1.4629	-0.00412
1.4648	-0.0181
1.4668	-0.0307
1.4688	-0.0321
1.4707	-0.0254
1.4727	-0.013
1.4746	0.00284
1.4766	0.0089
1.4785	0.00816
1.4805	0.00963
1.4824	0.0129
1.4844	0.0177
1.4863	0.0154
1.4883	0.0161
1.4902	0.0241
1.4922	0.032
1.4941	0.0284
1.4961	0.00882
1.498	-0.0164
1.5	-0.0333
1.502	-0.037
1.5039	-0.0275
1.5059	-0.0218
1.5078	-0.0103
1.5098	0.00358
1.5117	0.0139
1.5137	0.0166
1.5156	0.0126
1.5176	0.0079
1.5195	0.00874
1.5215	0.0135
1.5234	0.0208
1.5254	0.0266
1.5273	0.029
1.5293	0.0244
1.5313	0.00788
1.5332	-0.0182
1.5352	-0.0407
1.5371	-0.0424
1.5391	-0.0307
1.541	-0.0125
1.543	0.00217
1.5449	0.0102
1.5469	0.0179
1.5488	0.0226
1.5508	0.0214
1.5527	0.0132
1.5547	0.00836
1.5566	0.0127
1.5586	0.0215
1.5605	0.0235
1.5625	0.0136
1.5645	-0.00268
1.5664	-0.0189
1.5684	-0.0289
1.5703	-0.0308
1.5723	-0.0315
1.5742	-0.0235
1.5762	-0.00546
1.5781	0.0116
1.5801	0.0191
1.582	0.0203
1.584	0.0206
1.5859	0.0215
1.5879	0.0198
1.5898	0.0158
1.5918	0.0175
1.5938	0.0219
1.5957	0.0201
1.5977	-0.00157
1.5996	-0.0286
1.6016	-0.04
1.6035	-0.0316
1.6055	-0.0211
1.6074	-0.0129
1.6094	-0.00269
1.6113	0.0136
1.6133	0.0274
1.6152	0.0257
1.6172	0.0149
1.6191	0.01
1.6211	0.0156
1.623	0.0217
1.625	0.0173
1.627	0.0106
1.6289	0.00308
1.6309	-0.0115
1.6328	-0.0285
1.6348	-0.0379
1.6367	-0.0329
1.6387	-0.0176
1.6406	0.00013
1.6426	0.00891
1.6445	0.0184
1.6465	0.0255
1.6484	0.0274
1.6504	0.0201
1.6523	0.0133
1.6543	0.0155
1.6563	0.0232
1.6582	0.0235
1.6602	0.00527
1.6621	-0.0206
1.6641	-0.0395
1.666	-0.0382
1.668	-0.0325
1.6699	-0.0241
1.6719	-0.00827
1.6738	0.0143
1.6758	0.0322
1.6777	0.0326
1.6797	0.0207
1.6816	0.00956
1.6836	0.00987
1.6855	0.0128
1.6875	0.0144
1.6895	0.016
1.6914	0.0151
1.6934	-0.00158
1.6953	-0.0281
1.6973	-0.0423
1.6992	-0.0415
1.7012	-0.0245
1.7031	-0.00896
1.7051	0.00678
1.707	0.0276
1.709	0.045
1.7109	0.0419
1.7129	0.0224
1.7148	0.00669
1.7168	0.00453
1.7188	0.00651
1.7207	-0.0019
1.7227	-0.014
1.7246	-0.0211
1.7266	-0.0173
1.7285	-0.0206
1.7305	-0.029
1.7324	-0.0269
1.7344	-0.0072
1.7363	0.0139
1.7383	0.0265
1.7402	0.0311
1.7422	0.0348
1.7441	0.0342
1.7461	0.0229
1.748	0.00877
1.75	0.000451
1.752	-0.00414
1.7539	-0.0223
1.7559	-0.0365
1.7578	-0.0337
1.7598	-0.0166
1.7617	-0.00592
1.7637	-0.00566
1.7656	0.00179
1.7676	0.0224
1.7695	0.0338
1.7715	0.0263
1.7734	0.0149
1.7754	0.0188
1.7773	0.0237
1.7793	0.0103
1.7813	-0.0116
1.7832	-0.027
1.7852	-0.0287
1.7871	-0.0258
1.7891	-0.0309
1.791	-0.0228
1.793	7.95e-05
1.7949	0.0188
1.7969	0.0242
1.7988	0.0248
1.8008	0.029
1.8027	0.0305
1.8047	0.024
1.8066	0.0114
1.8086	0.00828
1.8105	-0.000441
1.8125	-0.0234
1.8145	-0.0449
1.8164	-0.0406
1.8184	-0.0248
1.8203	-0.00959
1.8223	-0.0048
1.8242	0.012
1.8262	0.033
1.8281	0.0402
1.8301	0.0226
1.832	0.0128
1.834	0.0151
1.8359	0.0192
1.8379	0.00626
1.8398	-0.0113
1.8418	-0.0263
1.8438	-0.0268
1.8457	-0.0299
1.8477	-0.0301
1.8496	-0.0179
1.8516	0.00555
1.8535	0.0241
1.8555	0.0332
1.8574	0.0342
1.8594	0.0334
1.8613	0.0279
1.8633	0.0152
1.8652	0.00103
1.8672	-0.0122
1.8691	-0.0274
1.8711	-0.0383
1.873	-0.034
1.875	-0.0248
1.877	-0.0127
1.8789	-0.00287
1.8809	0.0121
1.8828	0.0271
1.8848	0.0332
1.8867	0.0272
1.8887	0.0237
1.8906	0.0238
1.8926	0.0194
1.8945	0.00487
1.8965	-0.0166
1.8984	-0.0365
1.9004	-0.041
1.9023	-0.0354
1.9043	-0.0225
1.9063	-0.00602
1.9082	0.0143
1.9102	0.033
1.9121	0.0394
1.9141	0.0315
1.916	0.0214
1.918	0.0157
1.9199	0.00965
1.9219	-0.00293
1.9238	-0.0188
1.9258	-0.0319
1.9277	-0.0302
1.9297	-0.0277
1.9316	-0.0242
1.9336	-0.0129
1.9355	0.00714
1.9375	0.0282
1.9395	0.036
1.9414	0.0341
1.9434	0.0301
1.9453	0.0284
1.9473	0.0171
1.9492	0.000648
1.9512	-0.022
1.9531	-0.0395
1.9551	-0.0429
1.957	-0.0349
1.959	-0.0225
1.9609	-0.00371
1.9629	0.0146
1.9648	0.0336
1.9668	0.0378
1.9688	0.0301
1.9707	0.0222
1.9727	0.0192
1.9746	0.0107
1.9766	-0.00266
1.9785	-0.0216
1.9805	-0.0352
1.9824	-0.0347
1.9844	-0.0311
1.9863	-0.0215
1.9883	-0.00422
1.9902	0.0181
1.9922	0.0364
1.9941	0.0398
1.9961	0.034
1.998	0.0289
2	0.0206
2.002	0.00599
2.0039	-0.0174
2.0059	-0.0391
2.0078	-0.0453
2.0098	-0.0362
2.0117	-0.0265
2.0137	-0.0122
2.0156	0.00708
2.0176	0.0312
2.0195	0.0412
2.0215	0.0351
2.0234	0.0253
2.0254	0.024
2.0273	0.0165
2.0293	0.000555
2.0313	-0.023
2.0332	-0.0396
2.0352	-0.0391
2.0371	-0.033
2.0391	-0.0219
2.041	-0.00345
2.043	0.0219
2.0449	0.0408
2.0469	0.042
2.0488	0.0313
2.0508	0.0238
2.0527	0.0168
2.0547	-0.00124
2.0566	-0.0245
2.0586	-0.0419
2.0605	-0.0396
2.0625	-0.0303
2.0645	-0.0243
2.0664	-0.0106
2.0684	0.013
2.0703	0.0363
2.0723	0.042
2.0742	0.0341
2.0762	0.0291
2.0781	0.0277
2.0801	0.0123
2.082	-0.0144
2.084	-0.0422
2.0859	-0.0498
2.0879	-0.0419
2.0898	-0.0295
2.0918	-0.0123
2.0938	0.0146
2.0957	0.0419
2.0977	0.0481
2.0996	0.0354
2.1016	0.0237
2.1035	0.0176
2.1055	0.00398
2.1074	-0.0173
2.1094	-0.0382
2.1113	-0.0393
2.1133	-0.0301
2.1152	-0.0249
2.1172	-0.016
2.1191	0.00794
2.1211	0.0346
2.123	0.0433
2.125	0.0375
2.127	0.0337
2.1289	0.03
2.1309	0.0125
2.1328	-0.0238
2.1348	-0.0522
2.1367	-0.0557
2.1387	-0.0422
2.1406	-0.0289
2.1426	-0.00838
2.1445	0.0233
2.1465	0.0529
2.1484	0.0513
2.1504	0.0319
2.1523	0.02
2.1543	0.0163
2.1563	0.000284
2.1582	-0.0265
2.1602	-0.0446
2.1621	-0.0368
2.1641	-0.0266
2.166	-0.0213
2.168	-0.0102
2.1699	0.0216
2.1719	0.0465
2.1738	0.0446
2.1758	0.0319
2.1777	0.0283
2.1797	0.0209
2.1816	-0.00845
2.1836	-0.0466
2.1855	-0.0603
2.1875	-0.0432
2.1895	-0.0279
2.1914	-0.0167
2.1934	0.00817
2.1953	0.0445
2.1973	0.059
2.1992	0.0415
2.2012	0.0219
2.2031	0.0182
2.2051	0.00995
2.207	-0.0197
2.209	-0.0511
2.2109	-0.0509
2.2129	-0.0317
2.2148	-0.0194
2.2168	-0.0108
2.2188	0.0179
2.2207	0.0495
2.2227	0.053
2.2246	0.0348
2.2266	0.0228
2.2285	0.0138
2.2305	-0.00842
2.2324	-0.0448
2.2344	-0.0608
2.2363	-0.0445
2.2383	-0.0227
2.2402	-0.00746
2.2422	0.0132
2.2441	0.0451
2.2461	0.0578
2.248	0.044
2.25	0.0253
2.252	0.0139
2.2539	-0.00248
2.2559	-0.0366
2.2578	-0.0607
2.2598	-0.054
2.2617	-0.0311
2.2637	-0.0125
2.2656	0.00768
2.2676	0.0381
2.2695	0.0573
2.2715	0.0492
2.2734	0.0316
2.2754	0.0151
2.2773	-2.86e-05
2.2793	-0.0291
2.2813	-0.0548
2.2832	-0.0533
2.2852	-0.0341
2.2871	-0.0131
2.2891	0.00741
2.291	0.0365
2.293	0.055
2.2949	0.0492
2.2969	0.0333
2.2988	0.0173
2.3008	-0.00446
2.3027	-0.0363
2.3047	-0.0604
2.3066	-0.0558
2.3086	-0.0354
2.3105	-0.0147
2.3125	0.0103
2.3145	0.04
2.3164	0.0578
2.3184	0.0484
2.3203	0.0322
2.3223	0.0178
2.3242	-4.01e-05
2.3262	-0.0328
2.3281	-0.0574
2.3301	-0.0542
2.332	-0.0343
2.334	-0.0155
2.3359	0.00925
2.3379	0.0419
2.3398	0.0585
2.3418	0.0494
2.3438	0.0333
2.3457	0.0152
2.3477	-0.0101
2.3496	-0.045
2.3516	-0.0652
2.3535	-0.0525
2.3555	-0.0304
2.3574	-0.00678
2.3594	0.0213
2.3613	0.0536
2.3633	0.0621
2.3652	0.0467
2.3672	0.0273
2.3691	0.0101
2.3711	-0.0186
2.373	-0.0555
2.375	-0.0675
2.377	-0.051
2.3789	-0.0257
2.3809	-0.000315
2.3828	0.0323
2.3848	0.0598
2.3867	0.0603
2.3887	0.0431
2.3906	0.0222
2.3926	-0.000649
2.3945	-0.0325
2.3965	-0.0622
2.3984	-0.0605
2.4004	-0.0395
2.4023	-0.0134
2.4043	0.0133
2.4063	0.0481
2.4082	0.0635
2.4102	0.0538
2.4121	0.033
2.4141	0.0132
2.416	-0.0176
2.418	-0.0553
2.4199	-0.0718
2.4219	-0.0557
2.4238	-0.0293
2.4258	-0.00112
2.4277	0.0312
2.4297	0.0619
2.4316	0.0648
2.4336	0.0457
2.4355	0.0244
2.4375	0.00179
2.4395	-0.0325
2.4414	-0.0643
2.4434	-0.0662
2.4453	-0.043
2.4473	-0.016
2.4492	0.0147
2.4512	0.0515
2.4531	0.0669
2.4551	0.0555
2.457	0.0357
2.459	0.0108
2.4609	-0.0235
2.4629	-0.0617
2.4648	-0.0738
2.4668	-0.0541
2.4688	-0.0268
2.4707	0.00505
2.4727	0.042
2.4746	0.0714
2.4766	0.0653
2.4785	0.0441
2.4805	0.0195
2.4824	-0.00894
2.4844	-0.0518
2.4863	-0.078
2.4883	-0.0672
2.4902	-0.0375
2.4922	-0.0059
2.4941	0.0321
2.4961	0.0667
2.498	0.0711
2.5	0.0522
2.502	0.0266
2.5039	-0.00374
2.5059	-0.0423
2.5078	-0.0744
2.5098	-0.0696
2.5117	-0.0429
2.5137	-0.0108
2.5156	0.0248
2.5176	0.0636
2.5195	0.0734
2.5215	0.0563
2.5234	0.0308
2.5254	0.00359
2.5273	-0.0376
2.5293	-0.0752
2.5313	-0.0782
2.5332	-0.0515
2.5352	-0.019
2.5371	0.0182
2.5391	0.0572
2.541	0.0771
2.543	0.0633
2.5449	0.038
2.5469	0.00836
2.5488	-0.0278
2.5508	-0.0682
2.5527	-0.0772
2.5547	-0.0573
2.5566	-0.0239
2.5586	0.0133
2.5605	0.0572
2.5625	0.0773
2.5645	0.0655
2.5664	0.0413
2.5684	0.0114
2.5703	-0.0317
2.5723	-0.0748
2.5742	-0.0846
2.5762	-0.0585
2.5781	-0.0253
2.5801	0.0136
2.582	0.0573
2.584	0.0839
2.5859	0.0709
2.5879	0.0432
2.5898	0.0105
2.5918	-0.0279
2.5938	-0.0743
2.5957	-0.0867
2.5977	-0.0648
2.5996	-0.0274
2.6016	0.0146
2.6035	0.0618
2.6055	0.0831
2.6074	0.0716
2.6094	0.0448
2.6113	0.00816
2.6133	-0.0367
2.6152	-0.0811
2.6172	-0.0862
2.6191	-0.0576
2.6211	-0.0203
2.623	0.0216
2.625	0.0691
2.627	0.0878
2.6289	0.0698
2.6309	0.0373
2.6328	0.00168
2.6348	-0.0459
2.6367	-0.0874
2.6387	-0.0879
2.6406	-0.0572
2.6426	-0.0152
2.6445	0.0312
2.6465	0.0741
2.6484	0.0861
2.6504	0.0669
2.6523	0.0355
2.6543	-0.00474
2.6563	-0.0528
2.6582	-0.0881
2.6602	-0.08
2.6621	-0.0479
2.6641	-0.00913
2.666	0.0397
2.668	0.0833
2.6699	0.0852
2.6719	0.06
2.6738	0.0265
2.6758	-0.0176
2.6777	-0.0709
2.6797	-0.0974
2.6816	-0.0795
2.6836	-0.04
2.6855	0.00715
2.6875	0.0573
2.6895	0.0925
2.6914	0.0861
2.6934	0.0562
2.6953	0.0157
2.6973	-0.0348
2.6992	-0.0863
2.7012	-0.0982
2.7031	-0.071
2.7051	-0.0284
2.707	0.0237
2.709	0.0794
2.7109	0.0975
2.7129	0.0771
2.7148	0.0419
2.7168	-0.00567
2.7188	-0.0616
2.7207	-0.103
2.7227	-0.0924
2.7246	-0.0519
2.7266	-0.0019
2.7285	0.0528
2.7305	0.0966
2.7324	0.0951
2.7344	0.0643
2.7363	0.0201
2.7383	-0.0332
2.7402	-0.091
2.7422	-0.107
2.7441	-0.0793
2.7461	-0.0319
2.748	0.024
2.75	0.0816
2.752	0.103
2.7539	0.0838
2.7559	0.0443
2.7578	-0.00409
2.7598	-0.0637
2.7617	-0.105
2.7637	-0.0959
2.7656	-0.0532
2.7676	-0.0018
2.7695	0.0577
2.7715	0.102
2.7734	0.0976
2.7754	0.0644
2.7773	0.0177
2.7793	-0.0426
2.7813	-0.1
2.7832	-0.112
2.7852	-0.0783
2.7871	-0.0258
2.7891	0.0355
2.791	0.0934
2.793	0.111
2.7949	0.085
2.7969	0.0407
2.7988	-0.0175
2.8008	-0.0831
2.8027	-0.118
2.8047	-0.097
2.8066	-0.0489
2.8086	0.0132
2.8105	0.0807
2.8125	0.116
2.8145	0.0993
2.8164	0.0583
2.8184	-0.00171
2.8203	-0.0708
2.8223	-0.122
2.8242	-0.113
2.8262	-0.0642
2.8281	-0.000164
2.8301	0.0693
2.832	0.119
2.834	0.113
2.8359	0.0726
2.8379	0.0137
2.8398	-0.0585
2.8418	-0.122
2.8438	-0.124
2.8457	-0.0818
2.8477	-0.0165
2.8496	0.0581
2.8516	0.117
2.8535	0.121
2.8555	0.0847
2.8574	0.0256
2.8594	-0.0466
2.8613	-0.115
2.8633	-0.13
2.8652	-0.0895
2.8672	-0.0246
2.8691	0.0499
2.8711	0.116
2.873	0.128
2.875	0.0925
2.877	0.034
2.8789	-0.0421
2.8809	-0.118
2.8828	-0.139
2.8848	-0.102
2.8867	-0.0352
2.8887	0.0444
2.8906	0.116
2.8926	0.136
2.8945	0.103
2.8965	0.0437
2.8984	-0.036
2.9004	-0.116
2.9023	-0.145
2.9043	-0.109
2.9063	-0.0419
2.9082	0.0417
2.9102	0.121
2.9121	0.142
2.9141	0.109
2.916	0.0449
2.918	-0.0405
2.9199	-0.125
2.9219	-0.154
2.9238	-0.114
2.9258	-0.0393
2.9277	0.0515
2.9297	0.131
2.9316	0.152
2.9336	0.113
2.9355	0.0435
2.9375	-0.0486
2.9395	-0.138
2.9414	-0.161
2.9434	-0.116
2.9453	-0.036
2.9473	0.0615
2.9492	0.141
2.9512	0.155
2.9531	0.112
2.9551	0.0343
2.957	-0.0617
2.959	-0.148
2.9609	-0.162
2.9629	-0.107
2.9648	-0.0217
2.9668	0.0791
2.9688	0.154
2.9707	0.156
2.9727	0.104
2.9746	0.0207
2.9766	-0.0848
2.9785	-0.165
2.9805	-0.165
2.9824	-0.102
2.9844	-0.0051
2.9863	0.0994
2.9883	0.167
2.9902	0.158
2.9922	0.098
2.9941	0.00363
2.9961	-0.107
2.998	-0.178
3	-0.162
3.002	-0.0866
3.0039	0.0173
3.0059	0.127
3.0078	0.178
3.0098	0.154
3.0117	0.081
3.0137	-0.0284
3.0156	-0.142
3.0176	-0.193
3.0195	-0.154
3.0215	-0.0632
3.0234	0.056
3.0254	0.16
3.0273	0.191
3.0293	0.146
3.0313	0.0552
3.0332	-0.0697
3.0352	-0.179
3.0371	-0.2
3.0391	-0.138
3.041	-0.029
3.043	0.101
3.0449	0.189
3.0469	0.191
3.0488	0.126
3.0508	0.0112
3.0527	-0.122
3.0547	-0.208
3.0566	-0.19
3.0586	-0.102
3.0605	0.0264
3.0625	0.154
3.0645	0.211
3.0664	0.177
3.0684	0.0857
3.0703	-0.0496
3.0723	-0.181
3.0742	-0.223
3.0762	-0.169
3.0781	-0.0532
3.0801	0.0902
3.082	0.199
3.084	0.215
3.0859	0.151
3.0879	0.0314
3.0898	-0.117
3.0918	-0.22
3.0938	-0.214
3.0957	-0.123
3.0977	0.0142
3.0996	0.159
3.1016	0.226
3.1035	0.198
3.1055	0.101
3.1074	-0.0488
3.1094	-0.192
3.1113	-0.241
3.1133	-0.183
3.1152	-0.0569
3.1172	0.101
3.1191	0.218
3.1211	0.233
3.123	0.161
3.125	0.0253
3.127	-0.141
3.1289	-0.245
3.1309	-0.228
3.1328	-0.124
3.1348	0.0351
3.1367	0.186
3.1387	0.247
3.1406	0.209
3.1426	0.09
3.1445	-0.0799
3.1465	-0.226
3.1484	-0.256
3.1504	-0.176
3.1523	-0.0269
3.1543	0.146
3.1563	0.25
3.1582	0.241
3.1602	0.145
3.1621	-0.0214
3.1641	-0.198
3.166	-0.273
3.168	-0.225
3.1699	-0.0851
3.1719	0.0979
3.1738	0.238
3.1758	0.266
3.1777	0.194
3.1797	0.0373
3.1816	-0.154
3.1836	-0.275
3.1855	-0.257
3.1875	-0.137
3.1895	0.0502
3.1914	0.22
3.1934	0.28
3.1953	0.231
3.1973	0.086
3.1992	-0.117
3.2012	-0.272
3.2031	-0.288
3.2051	-0.181
3.207	0.00632
3.209	0.199
3.2109	0.294
3.2129	0.265
3.2148	0.133
3.2168	-0.0754
3.2188	-0.26
3.2207	-0.309
3.2227	-0.222
3.2246	-0.0371
3.2266	0.175
3.2285	0.295
3.2305	0.291
3.2324	0.169
3.2344	-0.0379
3.2363	-0.246
3.2383	-0.324
3.2402	-0.251
3.2422	-0.0701
3.2441	0.154
3.2461	0.301
3.248	0.311
3.25	0.201
3.252	-0.00977
3.2539	-0.237
3.2559	-0.338
3.2578	-0.283
3.2598	-0.101
3.2617	0.136
3.2637	0.304
3.2656	0.331
3.2676	0.23
3.2695	0.0181
3.2715	-0.221
3.2734	-0.348
3.2754	-0.304
3.2773	-0.127
3.2793	0.125
3.2813	0.308
3.2832	0.349
3.2852	0.251
3.2871	0.0337
3.2891	-0.219
3.291	-0.36
3.293	-0.327
3.2949	-0.144
3.2969	0.119
3.2988	0.32
3.3008	0.368
3.3027	0.271
3.3047	0.0465
3.3066	-0.218
3.3086	-0.371
3.3105	-0.344
3.3125	-0.161
3.3145	0.12
3.3164	0.328
3.3184	0.385
3.3203	0.283
3.3223	0.0519
3.3242	-0.221
3.3262	-0.38
3.3281	-0.357
3.3301	-0.168
3.332	0.123
3.334	0.344
3.3359	0.402
3.3379	0.301
3.3398	0.0568
3.3418	-0.227
3.3438	-0.398
3.3457	-0.382
3.3477	-0.181
3.3496	0.129
3.3516	0.362
3.3535	0.426
3.3555	0.323
3.3574	0.0693
3.3594	-0.232
3.3613	-0.422
3.3633	-0.412
3.3652	-0.196
3.3672	0.144
3.3691	0.387
3.3711	0.457
3.373	0.344
3.375	0.0687
3.377	-0.251
3.3789	-0.458
3.3809	-0.445
3.3828	-0.196
3.3848	0.172
3.3867	0.427
3.3887	0.49
3.3906	0.356
3.3926	0.0574
3.3945	-0.282
3.3965	-0.495
3.3984	-0.473
3.4004	-0.184
3.4023	0.21
3.4043	0.472
3.4063	0.522
3.4082	0.359
3.4102	0.0301
3.4121	-0.324
3.4141	-0.54
3.416	-0.489
3.418	-0.155
3.4199	0.267
3.4219	0.528
3.4238	0.553
3.4258	0.345
3.4277	-0.0187
3.4297	-0.383
3.4316	-0.589
3.4336	-0.489
3.4355	-0.104
3.4375	0.337
3.4395	0.585
3.4414	0.571
3.4434	0.312
3.4453	-0.0827
3.4473	-0.453
3.4492	-0.632
3.4512	-0.473
3.4531	-0.0323
3.4551	0.42
3.457	0.644
3.459	0.575
3.4609	0.26
3.4629	-0.162
3.4648	-0.534
3.4668	-0.665
3.4688	-0.43
3.4707	0.0616
3.4727	0.516
3.4746	0.695
3.4766	0.557
3.4785	0.181
3.4805	-0.261
3.4824	-0.615
3.4844	-0.678
3.4863	-0.355
3.4883	0.176
3.4902	0.614
3.4922	0.723
3.4941	0.505
3.4961	0.0801
3.498	-0.369
3.5	-0.687
3.502	-0.656
3.5039	-0.256
3.5059	0.307
3.5078	0.698
3.5098	0.725
3.5117	0.424
3.5137	-0.0301
3.5156	-0.479
3.5176	-0.731
3.5195	-0.602
3.5215	-0.127
3.5234	0.446
3.5254	0.763
3.5273	0.683
3.5293	0.308
3.5313	-0.165
3.5332	-0.583
3.5352	-0.743
3.5371	-0.51
3.5391	0.0239
3.541	0.575
3.543	0.791
3.5449	0.607
3.5469	0.174
3.5488	-0.303
3.5508	-0.667
3.5527	-0.713
3.5547	-0.387
3.5566	0.193
3.5586	0.68
3.5605	0.776
3.5625	0.49
3.5645	0.0217
3.5664	-0.437
3.5684	-0.711
3.5703	-0.635
3.5723	-0.228
3.5742	0.365
3.5762	0.746
3.5781	0.712
3.5801	0.338
3.582	-0.143
3.584	-0.553
3.5859	-0.704
3.5879	-0.521
3.5898	-0.0432
3.5918	0.511
3.5938	0.761
3.5957	0.602
3.5977	0.17
3.5996	-0.307
3.6016	-0.627
3.6035	-0.649
3.6055	-0.368
3.6074	0.151
3.6094	0.612
3.6113	0.716
3.6133	0.45
3.6152	-0.0152
3.6172	-0.443
3.6191	-0.641
3.6211	-0.543
3.623	-0.185
3.625	0.326
3.627	0.651
3.6289	0.615
3.6309	0.267
3.6328	-0.198
3.6348	-0.53
3.6367	-0.594
3.6387	-0.396
3.6406	0.015
3.6426	0.453
3.6445	0.628
3.6465	0.473
3.6484	0.0697
3.6504	-0.351
3.6523	-0.552
3.6543	-0.499
3.6563	-0.218
3.6582	0.195
3.6602	0.506
3.6621	0.544
3.6641	0.296
3.666	-0.118
3.668	-0.436
3.6699	-0.509
3.6719	-0.359
3.6738	-0.0243
3.6758	0.322
3.6777	0.491
3.6797	0.411
3.6816	0.0939
3.6836	-0.265
3.6855	-0.448
3.6875	-0.415
3.6895	-0.177
3.6914	0.146
3.6934	0.376
3.6953	0.418
3.6973	0.237
3.6992	-0.0894
3.7012	-0.335
3.7031	-0.402
3.7051	-0.266
3.707	0.0116
3.709	0.244
3.7109	0.348
3.7129	0.27
3.7148	0.0364
3.7168	-0.204
3.7188	-0.318
3.7207	-0.273
3.7227	-0.069
3.7246	0.142
3.7266	0.255
3.7285	0.239
3.7305	0.0837
3.7324	-0.107
3.7344	-0.223
3.7363	-0.229
3.7383	-0.0907
3.7402	0.0768
3.7422	0.178
3.7441	0.178
3.7461	0.0737
3.748	-0.0713
3.75	-0.149
3.752	-0.155
3.7539	-0.0597
3.7559	0.0662
3.7578	0.129
3.7598	0.122
3.7617	0.0273
3.7637	-0.088
3.7656	-0.133
3.7676	-0.103
3.7695	-0.00343
3.7715	0.0989
3.7734	0.132
3.7754	0.0928
3.7773	-0.00807
3.7793	-0.13
3.7813	-0.155
3.7832	-0.0962
3.7852	0.0373
3.7871	0.147
3.7891	0.158
3.791	0.0951
3.793	-0.0312
3.7949	-0.16
3.7969	-0.198
3.7988	-0.121
3.8008	0.044
3.8027	0.186
3.8047	0.199
3.8066	0.116
3.8086	-0.0322
3.8105	-0.176
3.8125	-0.22
3.8145	-0.157
3.8164	0.0233
3.8184	0.184
3.8203	0.221
3.8223	0.138
3.8242	-0.0213
3.8262	-0.171
3.8281	-0.218
3.8301	-0.164
3.832	0.000561
3.834	0.161
3.8359	0.21
3.8379	0.147
3.8398	-0.0165
3.8418	-0.157
3.8438	-0.203
3.8457	-0.149
3.8477	-0.00042
3.8496	0.131
3.8516	0.177
3.8535	0.125
3.8555	-0.0135
3.8574	-0.133
3.8594	-0.166
3.8613	-0.116
3.8633	0.0193
3.8652	0.103
3.8672	0.126
3.8691	0.0715
3.8711	-0.0365
3.873	-0.111
3.875	-0.118
3.877	-0.0527
3.8789	0.0561
3.8809	0.0982
3.8828	0.0808
3.8848	0.00629
3.8867	-0.0856
3.8887	-0.104
3.8906	-0.0745
3.8926	0.0216
3.8945	0.0964
3.8965	0.0999
3.8984	0.0436
3.9004	-0.0574
3.9023	-0.133
[truncated: 2,098 more rows]
