# Supplementary material for: Effect of the Supports’ Positions on the Vibration Characteristics of a Flexible Rotor Shafting
Source: Hindawi journal article supplement (doi:10.1155/2020/1592794), 2020-02-12
Supplement: f1 [file 1592794.f1.zip › 1592794.f1/test_data/Test data description.docx]

The Excel sheets under folder test data is the collected test data. Through the m file read_data, read the test data to get the picture in Figure 11-15 (Note: when the m file reads different data, you need to replace the data name)

Detailed instructions are as follows,

The Excel sheet named Table10_1 represents the test data under test number 1 in the manuscript table 10 (Figure 11(a)).

Similarly, the Excel sheet named Table10_2 represents the test data under test number 2 in the manuscript table 10 (Figure 11(b)),

and the Excel sheet named Table10_3 represents the test under test number 3 in the manuscript table 10 (Figure 11(c)),

the Excel sheet named Table10_4 represents the test data under test number 4 in the manuscript table 10 (Figure 12(a)),

and the Excel sheet named Table10_5 represents the test data under test number 5 in the manuscript table 10 (Figure 12(b)),

the Excel sheet named Table10_6 represents the test data under test number 6 in the manuscript table 10 (Figure 13(a)),

and the Excel sheet named Table10_7 represents the test data under test number 7 in the manuscript table 10 (Figure 13(b)),

the Excel sheet named Table11_8 represents the test data under test number 8 in the manuscript table 11 (Figure 14(f)),

the Excel sheet named Table11_9 represents the test data under test number 9 in the manuscript table 11 (Figure 14(e)),

and the Excel sheet named Table11_10 represents the test data under test number 10 in the manuscript table 11 (Figure 14(d)),

the Excel sheet named Table11_11 represents the test data under test number 11 in the manuscript table 11 (Figure 14(c)),

the Excel sheet named Table11_12 represents the test data under test number 12 in the manuscript table 11 (Figure 14(b)).

the Excel sheet named Table11_13 represents the test data under test number 13 in the manuscript table 11 (Figure 14(a)).

and the Excel sheet named figure 15 represents the test data when the critical speed vibration amount is the smallest (Figure 15),
